# Supplementary material for: Identification of a conserved S2 epitope present on spike proteins from all highly pathogenic coronaviruses
Source: eLife journal article supplement (doi:10.7554/elife.83710), 2023-03-07
Supplement: fig1-data1 [file elife-83710-fig1-data1-v1.xlsx]

## Sheet: Fig. 1 Source Data 1
Data Set	SARS-2 HexaPro spike	SARS-2	SARS-2
		HexaPro spike	HexaPro spike
		+ 3A3 IgG	+ 3A3 Fab
HDX reaction details	200 mM NaCl, 20 mM Tris
	0.5 μM S2	0.5 μM S2	0.5 μM S2
		0.55 μM 3A3 IgG	0.55 μM 3A3 Fab
	pHread = 7.6
HDX time course (s)	10, 100, 1000, 10000 at 25°C
HDX control samples	Unlabeled S2
Back-exchange (mean %)	~40
# of peptides	192
Sequence coverage (%)	56.3
Average peptide length (aa)/redundancy	13/3.34
Replicates (biological or technical)	4 (technical)
Average standard deviation (Da)	0.1
Significance	Average ΔHDX >0.2 Da, p-value<0.01

## Sheet: Fig. 1 Source Data 2
Protein	Start	End	Sequence	Modification	Fragment	MaxUptake	MHP	State	Exposure	Center	Center SD	Uptake	Uptake SD	RT	RT SD
P00001	24	36	QQSGAELLKPGAS			11	1285.67	S2_3A3Fab_complex	0.167	1289.11	0.097266	NaN	NaN	6.43037	0.002286
P00001	24	36	QQSGAELLKPGAS			11	1285.67	S2_3A3Fab_complex	1.667	1290.3	0.078823	NaN	NaN	6.42903	0.006267
P00001	24	36	QQSGAELLKPGAS			11	1285.67	S2_3A3Fab_complex	16.667	1291.02	0.143524	NaN	NaN	6.38174	0.049815
P00001	24	36	QQSGAELLKPGAS			11	1285.67	S2_3A3Fab_complex	166.667	1291.33	0.106087	NaN	NaN	6.43098	0.014456
P00001	24	36	QQSGAELLKPGAS			11	1285.67	S2_Alone	0	1286.2	0.039722	0	0	6.3589	0.033761
P00001	24	36	QQSGAELLKPGAS			11	1285.67	S2_Alone	0.167	1294.98	1.3573	8.77499	1.35789	6.3966	0.045863
P00001	24	36	QQSGAELLKPGAS			11	1285.67	S2_Alone	1.667	1294.87	2.21283	8.66978	2.21319	6.39699	0.050467
P00001	24	36	QQSGAELLKPGAS			11	1285.67	S2_Alone	16.667	1287.66	2.22958	1.45962	2.22993	6.43437	0.009323
P00001	24	36	QQSGAELLKPGAS			11	1285.67	S2_Alone	166.667	1289.11	4.54094	2.91483	4.54111	6.35937	0.044077
P00001	24	36	QQSGAELLKPGAS			11	1285.67	S2_FL_complex	0	1286.2	0.039722	0	0	6.3589	0.033761
P00001	24	36	QQSGAELLKPGAS			11	1285.67	S2_FL_complex	0.167	1295.48	0.244278	9.28168	0.247487	6.43253	0.049314
P00001	24	36	QQSGAELLKPGAS			11	1285.67	S2_FL_complex	1.667	1294.35	2.65736	8.14735	2.65765	6.45022	0.021985
P00001	24	36	QQSGAELLKPGAS			11	1285.67	S2_FL_complex	16.667	1296.51	0.538503	10.3102	0.539966	6.43478	0.05229
P00001	24	36	QQSGAELLKPGAS			11	1285.67	S2_FL_complex	166.667	1293.61	2.87893	7.40843	2.8792	6.39839	0.044063
P00001	47	64	NIKDTYIHWLKQRPEQGL			16	2239.2	S2_3A3Fab_complex	0	2240.48	0.033266	0	0	7.21709	0.021942
P00001	47	64	NIKDTYIHWLKQRPEQGL			16	2239.2	S2_3A3Fab_complex	0.167	2243.64	0.030321	3.16565	0.045012	7.25037	0.002513
P00001	47	64	NIKDTYIHWLKQRPEQGL			16	2239.2	S2_3A3Fab_complex	1.667	2245.12	0.068207	4.63998	0.075887	7.24658	0.007574
P00001	47	64	NIKDTYIHWLKQRPEQGL			16	2239.2	S2_3A3Fab_complex	16.667	2245.42	0.085388	4.94309	0.091639	7.21939	0.033211
P00001	47	64	NIKDTYIHWLKQRPEQGL			16	2239.2	S2_3A3Fab_complex	166.667	2245.63	0.027916	5.15278	0.043428	7.24714	0.014273
P00001	47	64	NIKDTYIHWLKQRPEQGL			16	2239.2	S2_Alone	0	2240.48	0.033266	0	0	7.21709	0.021942
P00001	47	64	NIKDTYIHWLKQRPEQGL			16	2239.2	S2_Alone	0.167	2241.45	0.290509	0.973494	0.292408	7.237	0.020927
P00001	47	64	NIKDTYIHWLKQRPEQGL			16	2239.2	S2_Alone	1.667	2241.29	0.145091	0.817771	0.148856	7.27136	0.016747
P00001	47	64	NIKDTYIHWLKQRPEQGL			16	2239.2	S2_Alone	16.667	2241.69	0.51835	1.21219	0.519417	7.25813	0.011252
P00001	47	64	NIKDTYIHWLKQRPEQGL			16	2239.2	S2_Alone	166.667	2241.23	0.190412	0.758936	0.193296	7.21205	0.030874
P00001	47	64	NIKDTYIHWLKQRPEQGL			16	2239.2	S2_FL_complex	0	2240.48	0.033266	0	0	7.21709	0.021942
P00001	47	64	NIKDTYIHWLKQRPEQGL			16	2239.2	S2_FL_complex	0.167	2243.73	0.032758	3.25426	0.046688	7.23079	0.030285
P00001	47	64	NIKDTYIHWLKQRPEQGL			16	2239.2	S2_FL_complex	1.667	2245.11	0.075515	4.63711	0.082517	7.24139	0.01267
P00001	47	64	NIKDTYIHWLKQRPEQGL			16	2239.2	S2_FL_complex	16.667	2245.4	0.024588	4.91938	0.041367	7.23208	0.031558
P00001	47	64	NIKDTYIHWLKQRPEQGL			16	2239.2	S2_FL_complex	166.667	2245.68	0.148127	5.20726	0.151817	7.22627	0.006878
P00001	47	65	NIKDTYIHWLKQRPEQGLE			17	2368.24	S2_3A3Fab_complex	0	2369.51	0.02707	0	0	7.15454	0.020251
P00001	47	65	NIKDTYIHWLKQRPEQGLE			17	2368.24	S2_3A3Fab_complex	0.167	2372.72	0.047347	3.20624	0.054539	7.19367	0.002869
P00001	47	65	NIKDTYIHWLKQRPEQGLE			17	2368.24	S2_3A3Fab_complex	1.667	2374.16	0.051678	4.65036	0.058338	7.18888	0.009279
P00001	47	65	NIKDTYIHWLKQRPEQGLE			17	2368.24	S2_3A3Fab_complex	16.667	2374.47	0.068267	4.96429	0.073438	7.15971	0.035462
P00001	47	65	NIKDTYIHWLKQRPEQGLE			17	2368.24	S2_3A3Fab_complex	166.667	2374.77	0.028864	5.26171	0.039572	7.19069	0.012557
P00001	47	65	NIKDTYIHWLKQRPEQGLE			17	2368.24	S2_Alone	0	2369.51	0.02707	0	0	7.15454	0.020251
P00001	47	65	NIKDTYIHWLKQRPEQGLE			17	2368.24	S2_Alone	0.167	2369.4	0.62391	-0.107626	0.624497	7.19295	0.017359
P00001	47	65	NIKDTYIHWLKQRPEQGLE			17	2368.24	S2_Alone	1.667	2370.12	0.958602	0.607826	0.958985	7.20771	0.013563
P00001	47	65	NIKDTYIHWLKQRPEQGLE			17	2368.24	S2_Alone	16.667	2370.9	0.905413	1.38726	0.905818	7.21151	0.018888
P00001	47	65	NIKDTYIHWLKQRPEQGLE			17	2368.24	S2_Alone	166.667	2370.41	1.20602	0.905266	1.20633	7.16246	0.005996
P00001	47	65	NIKDTYIHWLKQRPEQGLE			17	2368.24	S2_FL_complex	0	2369.51	0.02707	0	0	7.15454	0.020251
P00001	47	65	NIKDTYIHWLKQRPEQGLE			17	2368.24	S2_FL_complex	0.167	2372.79	0.040909	3.2832	0.049054	7.1781	0.033176
P00001	47	65	NIKDTYIHWLKQRPEQGLE			17	2368.24	S2_FL_complex	1.667	2374.14	0.113505	4.62577	0.116688	7.1892	0.013492
P00001	47	65	NIKDTYIHWLKQRPEQGLE			17	2368.24	S2_FL_complex	16.667	2374.5	0.066195	4.98925	0.071516	7.16986	0.037072
P00001	47	65	NIKDTYIHWLKQRPEQGLE			17	2368.24	S2_FL_complex	166.667	2374.75	0.074423	5.23726	0.079193	7.16	0.023741
P00001	56	64	LKQRPEQGL			7	1068.62	S2_3A3Fab_complex	0	1069.21	0.064536	0	0	5.74651	0.034132
P00001	56	64	LKQRPEQGL			7	1068.62	S2_3A3Fab_complex	16.667	1071.98	0.007844	2.77	0.065011	5.74208	0.003649
P00001	56	64	LKQRPEQGL			7	1068.62	S2_Alone	0	1069.21	0.064536	0	0	5.74651	0.034132
P00001	56	64	LKQRPEQGL			7	1068.62	S2_Alone	1.667	1069.92	0	0.702175	0.064536	5.73286	0
P00001	56	64	LKQRPEQGL			7	1068.62	S2_Alone	166.667	1069.41	0.076644	0.194424	0.100196	5.72181	0.001371
P00001	56	64	LKQRPEQGL			7	1068.62	S2_FL_complex	0	1069.21	0.064536	0	0	5.74651	0.034132
P00001	56	64	LKQRPEQGL			7	1068.62	S2_FL_complex	0.167	1071.06	0.051558	1.84285	0.082602	5.73284	0.005979
P00001	56	64	LKQRPEQGL			7	1068.62	S2_FL_complex	1.667	1072.48	0	3.26326	0.064536	5.8077	0
P00001	56	64	LKQRPEQGL			7	1068.62	S2_FL_complex	16.667	1071.9	0.000282	2.68812	0.064537	5.7255	0.007447
P00001	56	64	LKQRPEQGL			7	1068.62	S2_FL_complex	166.667	1072.23	0.654488	3.01956	0.657662	5.74005	0.023565
P00001	65	80	EWIGRIGPAIGNTIYA			14	1730.92	S2_3A3Fab_complex	0	1732.22	0.362248	0	0	7.68992	0.008347
P00001	65	80	EWIGRIGPAIGNTIYA			14	1730.92	S2_3A3Fab_complex	0.167	1733.77	0.183182	1.5461	0.405931	7.71203	0.003382
P00001	65	80	EWIGRIGPAIGNTIYA			14	1730.92	S2_3A3Fab_complex	1.667	1735.45	0.220773	3.22567	0.424223	7.70255	0.008897
P00001	65	80	EWIGRIGPAIGNTIYA			14	1730.92	S2_3A3Fab_complex	16.667	1735.48	1.64243	3.26237	1.68191	7.70282	0.002938
P00001	65	80	EWIGRIGPAIGNTIYA			14	1730.92	S2_3A3Fab_complex	166.667	1736.51	0.805801	4.28712	0.883481	7.70473	0.012344
P00001	65	80	EWIGRIGPAIGNTIYA			14	1730.92	S2_Alone	0	1732.22	0.362248	0	0	7.68992	0.008347
P00001	65	80	EWIGRIGPAIGNTIYA			14	1730.92	S2_Alone	0.167	1734.71	3.0877	2.49222	3.10887	7.7033	0.00761
P00001	65	80	EWIGRIGPAIGNTIYA			14	1730.92	S2_Alone	1.667	1733.21	1.8068	0.988141	1.84276	7.71506	0.006871
P00001	65	80	EWIGRIGPAIGNTIYA			14	1730.92	S2_Alone	16.667	1732.8	0.410625	0.580019	0.547573	7.70507	0.010548
P00001	65	80	EWIGRIGPAIGNTIYA			14	1730.92	S2_Alone	166.667	1733.51	3.13117	1.28899	3.15205	7.67607	0.012686
P00001	65	80	EWIGRIGPAIGNTIYA			14	1730.92	S2_FL_complex	0	1732.22	0.362248	0	0	7.68992	0.008347
P00001	65	80	EWIGRIGPAIGNTIYA			14	1730.92	S2_FL_complex	0.167	1734.58	0.491373	2.35283	0.610468	7.70298	0.021033
P00001	65	80	EWIGRIGPAIGNTIYA			14	1730.92	S2_FL_complex	1.667	1735.51	0.603228	3.29124	0.703639	7.70144	0.014245
P00001	65	80	EWIGRIGPAIGNTIYA			14	1730.92	S2_FL_complex	16.667	1735.55	1.04614	3.32674	1.10708	7.71023	0.002807
P00001	65	80	EWIGRIGPAIGNTIYA			14	1730.92	S2_FL_complex	166.667	1737.2	0.568082	4.98053	0.673751	7.68915	0.008185
P00001	65	83	EWIGRIGPAIGNTIYAPKF			16	2103.14	S2_3A3Fab_complex	0	2104.35	0.000387	0	0	7.65129	0.009169
P00001	65	83	EWIGRIGPAIGNTIYAPKF			16	2103.14	S2_3A3Fab_complex	0.167	2105.07	0.147457	0.720974	0.147458	7.68075	0.002403
P00001	65	83	EWIGRIGPAIGNTIYAPKF			16	2103.14	S2_3A3Fab_complex	1.667	2105.64	0.608458	1.28366	0.608458	7.67501	0.007082
P00001	65	83	EWIGRIGPAIGNTIYAPKF			16	2103.14	S2_3A3Fab_complex	16.667	2105.45	0.11998	1.09203	0.11998	7.65899	0.022035
P00001	65	83	EWIGRIGPAIGNTIYAPKF			16	2103.14	S2_3A3Fab_complex	166.667	2105.2	0.185633	0.848442	0.185633	7.69192	0.008654
P00001	65	83	EWIGRIGPAIGNTIYAPKF			16	2103.14	S2_Alone	0	2104.35	0.000387	0	0	7.65129	0.009169
P00001	65	83	EWIGRIGPAIGNTIYAPKF			16	2103.14	S2_Alone	0.167	2113.57	8.21124	9.21976	8.21124	7.64831	0.019533
P00001	65	83	EWIGRIGPAIGNTIYAPKF			16	2103.14	S2_Alone	1.667	2106.58	4.41918	2.23062	4.41918	7.68264	0.020805
P00001	65	83	EWIGRIGPAIGNTIYAPKF			16	2103.14	S2_Alone	16.667	2105.13	0.362007	0.774912	0.362007	7.67768	0.006967
P00001	65	83	EWIGRIGPAIGNTIYAPKF			16	2103.14	S2_Alone	166.667	2105.53	3.75315	1.18152	3.75315	7.64635	0.01393
P00001	65	83	EWIGRIGPAIGNTIYAPKF			16	2103.14	S2_FL_complex	0	2104.35	0.000387	0	0	7.65129	0.009169
P00001	65	83	EWIGRIGPAIGNTIYAPKF			16	2103.14	S2_FL_complex	0.167	2105.42	0.154291	1.06521	0.154291	7.68657	0.017936
P00001	65	83	EWIGRIGPAIGNTIYAPKF			16	2103.14	S2_FL_complex	1.667	2106.33	3.69569	1.97657	3.69569	7.67308	0.0222
P00001	65	83	EWIGRIGPAIGNTIYAPKF			16	2103.14	S2_FL_complex	16.667	2105.3	0.332011	0.949398	0.332012	7.67512	0.016471
P00001	65	83	EWIGRIGPAIGNTIYAPKF			16	2103.14	S2_FL_complex	166.667	2107.6	6.35507	3.24579	6.35507	7.66838	0.021689
P00001	103	109	SSLTSED			6	738.315	S2_3A3Fab_complex	0.167	739.924	0.032913	NaN	NaN	6.11189	0.002386
P00001	103	109	SSLTSED			6	738.315	S2_3A3Fab_complex	1.667	740.256	0.26984	NaN	NaN	6.11014	0.006112
P00001	103	109	SSLTSED			6	738.315	S2_3A3Fab_complex	16.667	741.161	0.292047	NaN	NaN	6.04545	0.054131
P00001	103	109	SSLTSED			6	738.315	S2_3A3Fab_complex	166.667	741.402	0.029968	NaN	NaN	6.10121	0.00381
P00001	103	109	SSLTSED			6	738.315	S2_Alone	0	738.592	0.055924	0	0	6.02816	0.032923
P00001	103	109	SSLTSED			6	738.315	S2_Alone	0.167	740.373	1.38981	1.78127	1.39093	6.03869	0.068383
P00001	103	109	SSLTSED			6	738.315	S2_Alone	1.667	741.356	1.11351	2.76389	1.11492	6.03688	0.081758
P00001	103	109	SSLTSED			6	738.315	S2_Alone	16.667	739.425	0.744615	0.833367	0.746712	6.1027	0.007615
P00001	103	109	SSLTSED			6	738.315	S2_Alone	166.667	739.491	1.07434	0.899783	1.0758	6.02638	0.048562
P00001	103	109	SSLTSED			6	738.315	S2_FL_complex	0	738.592	0.055924	0	0	6.02816	0.032923
P00001	103	109	SSLTSED			6	738.315	S2_FL_complex	0.167	740.046	0.563709	1.45419	0.566476	6.04959	0.056576
P00001	103	109	SSLTSED			6	738.315	S2_FL_complex	1.667	740.351	0.110751	1.75959	0.124069	6.10236	0.010888
P00001	103	109	SSLTSED			6	738.315	S2_FL_complex	16.667	741.467	0.309842	2.8751	0.314849	6.06096	0.064913
P00001	103	109	SSLTSED			6	738.315	S2_FL_complex	166.667	741.374	0.092725	2.78247	0.108284	6.04709	0.044968
P00001	106	112	TSEDTAV			6	722.32	S2_3A3Fab_complex	0	722.587	0.069972	0	0	5.90099	0.046491
P00001	106	112	TSEDTAV			6	722.32	S2_3A3Fab_complex	0.167	724.287	0.641715	1.70005	0.645519	6.01782	0.00101
P00001	106	112	TSEDTAV			6	722.32	S2_3A3Fab_complex	1.667	723.321	0.010172	0.734329	0.070708	5.86155	0.009368
P00001	106	112	TSEDTAV			6	722.32	S2_3A3Fab_complex	16.667	723.859	0.156863	1.27163	0.171762	5.90303	0.01276
P00001	106	112	TSEDTAV			6	722.32	S2_3A3Fab_complex	166.667	724.026	0.054933	1.43933	0.088959	5.86144	0.014373
P00001	106	112	TSEDTAV			6	722.32	S2_Alone	0	722.587	0.069972	0	0	5.90099	0.046491
P00001	106	112	TSEDTAV			6	722.32	S2_Alone	0.167	722.815	0.05725	0.227814	0.090408	5.99105	0.026729
P00001	106	112	TSEDTAV			6	722.32	S2_Alone	1.667	723.769	1.74707	1.18164	1.74847	5.8795	0.028009
P00001	106	112	TSEDTAV			6	722.32	S2_Alone	16.667	723.399	0.251572	0.811949	0.261122	5.91419	0.062002
P00001	106	112	TSEDTAV			6	722.32	S2_Alone	166.667	723.772	0.50492	1.18528	0.509746	5.87744	0.015587
P00001	106	112	TSEDTAV			6	722.32	S2_FL_complex	0	722.587	0.069972	0	0	5.90099	0.046491
P00001	106	112	TSEDTAV			6	722.32	S2_FL_complex	0.167	723.607	0.455904	1.01954	0.461242	5.92167	0.045921
P00001	106	112	TSEDTAV			6	722.32	S2_FL_complex	1.667	723.328	0.117334	0.741299	0.136614	5.95652	0.048048
P00001	106	112	TSEDTAV			6	722.32	S2_FL_complex	16.667	724.047	0.45788	1.4601	0.463196	5.91978	0.053992
P00001	106	112	TSEDTAV			6	722.32	S2_FL_complex	166.667	724.178	0	1.59089	0.069972	5.97842	0
P00001	124	135	YYFDYWGQGTTL			11	1513.66	S2_3A3Fab_complex	0.167	1516.22	0.09346	NaN	NaN	8.5868	0.001677
P00001	124	135	YYFDYWGQGTTL			11	1513.66	S2_3A3Fab_complex	1.667	1517.15	0.094481	NaN	NaN	8.57427	0.014345
P00001	124	135	YYFDYWGQGTTL			11	1513.66	S2_3A3Fab_complex	16.667	1518.47	0.20213	NaN	NaN	8.57719	0.004866
P00001	124	135	YYFDYWGQGTTL			11	1513.66	S2_3A3Fab_complex	166.667	1519.19	0.363075	NaN	NaN	8.56249	0.016663
P00001	124	135	YYFDYWGQGTTL			11	1513.66	S2_Alone	0	1514.42	0.040422	0	0	8.58486	0.006834
P00001	124	135	YYFDYWGQGTTL			11	1513.66	S2_Alone	0.167	1515.81	0.345075	1.38824	0.347434	8.5536	0.008985
P00001	124	135	YYFDYWGQGTTL			11	1513.66	S2_Alone	1.667	1515.36	0.184693	0.943952	0.189064	8.57348	0.013288
P00001	124	135	YYFDYWGQGTTL			11	1513.66	S2_Alone	16.667	1515.83	0.450172	1.41214	0.451983	8.58114	0.006365
P00001	124	135	YYFDYWGQGTTL			11	1513.66	S2_Alone	166.667	1515.6	0.287575	1.18477	0.290402	8.58366	0.006796
P00001	124	135	YYFDYWGQGTTL			11	1513.66	S2_FL_complex	0	1514.42	0.040422	0	0	8.58486	0.006834
P00001	124	135	YYFDYWGQGTTL			11	1513.66	S2_FL_complex	0.167	1516.34	0.029792	1.92535	0.050215	8.58094	0.013194
P00001	124	135	YYFDYWGQGTTL			11	1513.66	S2_FL_complex	1.667	1517.08	0.100052	2.66114	0.107909	8.57045	0.018783
P00001	124	135	YYFDYWGQGTTL			11	1513.66	S2_FL_complex	16.667	1518.5	0.160108	4.0847	0.165132	8.584	0.003642
P00001	124	135	YYFDYWGQGTTL			11	1513.66	S2_FL_complex	166.667	1519.46	0.111733	5.04133	0.11882	8.55999	0.01666
P00001	125	135	YFDYWGQGTTL			10	1350.6	S2_3A3Fab_complex	0	1351.33	0.05153	0	0	8.40776	0.005629
P00001	125	135	YFDYWGQGTTL			10	1350.6	S2_3A3Fab_complex	0.167	1352.73	0.046706	1.39278	0.069547	8.41837	0.005186
P00001	125	135	YFDYWGQGTTL			10	1350.6	S2_3A3Fab_complex	1.667	1353.36	0.074128	2.0241	0.090279	8.40381	0.012706
P00001	125	135	YFDYWGQGTTL			10	1350.6	S2_3A3Fab_complex	16.667	1354.4	0.134441	3.06628	0.143978	8.40257	0.005501
P00001	125	135	YFDYWGQGTTL			10	1350.6	S2_3A3Fab_complex	166.667	1355.12	0.212681	3.78395	0.218834	8.40263	0.01711
P00001	125	135	YFDYWGQGTTL			10	1350.6	S2_Alone	0	1351.33	0.05153	0	0	8.40776	0.005629
P00001	125	135	YFDYWGQGTTL			10	1350.6	S2_Alone	0.167	1352.25	0.220166	0.919116	0.226116	8.39155	0.019974
P00001	125	135	YFDYWGQGTTL			10	1350.6	S2_Alone	1.667	1352.04	0.187571	0.70636	0.19452	8.4197	0.011208
P00001	125	135	YFDYWGQGTTL			10	1350.6	S2_Alone	16.667	1352.31	0.417411	0.976374	0.42058	8.41637	0.008656
P00001	125	135	YFDYWGQGTTL			10	1350.6	S2_Alone	166.667	1352.35	0.646448	1.01926	0.648499	8.41117	0.01034
P00001	125	135	YFDYWGQGTTL			10	1350.6	S2_FL_complex	0	1351.33	0.05153	0	0	8.40776	0.005629
P00001	125	135	YFDYWGQGTTL			10	1350.6	S2_FL_complex	0.167	1352.81	0.041744	1.47921	0.066317	8.41116	0.014383
P00001	125	135	YFDYWGQGTTL			10	1350.6	S2_FL_complex	1.667	1353.35	0.042451	2.01604	0.066764	8.39753	0.018067
P00001	125	135	YFDYWGQGTTL			10	1350.6	S2_FL_complex	16.667	1354.4	0.0701	3.06453	0.087002	8.40929	0.004911
P00001	125	135	YFDYWGQGTTL			10	1350.6	S2_FL_complex	166.667	1355.15	0.158837	3.81694	0.166986	8.3948	0.009921
P00001	127	135	DYWGQGTTL			8	1040.47	S2_3A3Fab_complex	0	1041.03	0.053409	0	0	7.92468	0.012642
P00001	127	135	DYWGQGTTL			8	1040.47	S2_3A3Fab_complex	0.167	1048.35	0.049922	7.32747	0.073108	7.9004	0.002148
P00001	127	135	DYWGQGTTL			8	1040.47	S2_3A3Fab_complex	1.667	1042.91	0.429095	1.88237	0.432406	7.93744	0.011678
P00001	127	135	DYWGQGTTL			8	1040.47	S2_3A3Fab_complex	16.667	1048.68	0.321015	7.65657	0.325427	7.88384	0.015712
P00001	127	135	DYWGQGTTL			8	1040.47	S2_3A3Fab_complex	166.667	1048.89	0.058552	7.8661	0.079251	7.89546	0.009409
P00001	127	135	DYWGQGTTL			8	1040.47	S2_Alone	0	1041.03	0.053409	0	0	7.92468	0.012642
P00001	127	135	DYWGQGTTL			8	1040.47	S2_Alone	0.167	1041.7	0.276252	0.677228	0.281368	7.92732	0.013306
P00001	127	135	DYWGQGTTL			8	1040.47	S2_Alone	1.667	1041.63	0.145528	0.606026	0.155019	7.95372	0.007298
P00001	127	135	DYWGQGTTL			8	1040.47	S2_Alone	16.667	1041.84	0.294081	0.813538	0.298891	7.94309	0.006949
P00001	127	135	DYWGQGTTL			8	1040.47	S2_Alone	166.667	1041.72	0.224815	0.691878	0.231072	7.91874	0.018058
P00001	127	135	DYWGQGTTL			8	1040.47	S2_FL_complex	0	1041.03	0.053409	0	0	7.92468	0.012642
P00001	127	135	DYWGQGTTL			8	1040.47	S2_FL_complex	0.167	1042.64	1.01086	1.60987	1.01227	7.90852	0.00206
P00001	127	135	DYWGQGTTL			8	1040.47	S2_FL_complex	1.667	1042.9	0.505134	1.87189	0.507949	7.93023	0.012954
P00001	127	135	DYWGQGTTL			8	1040.47	S2_FL_complex	16.667	1043.57	0.433536	2.53954	0.436814	7.94413	0.006144
P00001	127	135	DYWGQGTTL			8	1040.47	S2_FL_complex	166.667	1048.98	0.031586	7.9515	0.06205	7.87958	0.0122
P00001	136	164	TVSSASTKGPSVFPLAPSSKSTSGGTAAL			25	2693.4	S2_3A3Fab_complex	0	2694.86	0.079625	0	0	6.97311	0.020369
P00001	136	164	TVSSASTKGPSVFPLAPSSKSTSGGTAAL			25	2693.4	S2_3A3Fab_complex	0.167	2695.34	0.062441	0.479693	0.101188	7.02117	0.004507
P00001	136	164	TVSSASTKGPSVFPLAPSSKSTSGGTAAL			25	2693.4	S2_3A3Fab_complex	1.667	2696.32	2.03064	1.45956	2.0322	7.00984	0.03183
P00001	136	164	TVSSASTKGPSVFPLAPSSKSTSGGTAAL			25	2693.4	S2_3A3Fab_complex	16.667	2695.86	1.36723	1.00445	1.36955	6.99429	0.0284
P00001	136	164	TVSSASTKGPSVFPLAPSSKSTSGGTAAL			25	2693.4	S2_3A3Fab_complex	166.667	2696.54	2.5646	1.68468	2.56583	6.99911	0.041362
P00001	136	164	TVSSASTKGPSVFPLAPSSKSTSGGTAAL			25	2693.4	S2_Alone	0	2694.86	0.079625	0	0	6.97311	0.020369
P00001	136	164	TVSSASTKGPSVFPLAPSSKSTSGGTAAL			25	2693.4	S2_Alone	0.167	2695.14	1.69709	0.281124	1.69896	6.9766	0.049017
P00001	136	164	TVSSASTKGPSVFPLAPSSKSTSGGTAAL			25	2693.4	S2_Alone	1.667	2695.46	1.17775	0.599842	1.18044	6.88939	0.075915
P00001	136	164	TVSSASTKGPSVFPLAPSSKSTSGGTAAL			25	2693.4	S2_Alone	16.667	2695.9	1.35392	1.04468	1.35626	7.00584	0.026852
P00001	136	164	TVSSASTKGPSVFPLAPSSKSTSGGTAAL			25	2693.4	S2_Alone	166.667	2695.53	0.27433	0.66609	0.285652	6.95396	0.019365
P00001	136	164	TVSSASTKGPSVFPLAPSSKSTSGGTAAL			25	2693.4	S2_FL_complex	0	2694.86	0.079625	0	0	6.97311	0.020369
P00001	136	164	TVSSASTKGPSVFPLAPSSKSTSGGTAAL			25	2693.4	S2_FL_complex	0.167	2700.72	0.582861	5.86066	0.588275	6.99883	0.034905
P00001	136	164	TVSSASTKGPSVFPLAPSSKSTSGGTAAL			25	2693.4	S2_FL_complex	1.667	2701.29	0.652171	6.43167	0.657013	7.01112	0.00972
P00001	136	164	TVSSASTKGPSVFPLAPSSKSTSGGTAAL			25	2693.4	S2_FL_complex	16.667	2701.46	0.811795	6.59843	0.815691	6.99732	0.040247
P00001	136	164	TVSSASTKGPSVFPLAPSSKSTSGGTAAL			25	2693.4	S2_FL_complex	166.667	2702.72	0.423531	7.86169	0.43095	6.98417	0.023923
P00001	149	164	PLAPSSKSTSGGTAAL			13	1444.76	S2_3A3Fab_complex	0	1445.57	0.364695	0	0	6.27828	0.025535
P00001	149	164	PLAPSSKSTSGGTAAL			13	1444.76	S2_3A3Fab_complex	0.167	1445.46	1.32916	-0.108776	1.37828	6.35415	0.018051
P00001	149	164	PLAPSSKSTSGGTAAL			13	1444.76	S2_3A3Fab_complex	1.667	1445.74	0.722961	0.172481	0.809738	6.35256	0.016473
P00001	149	164	PLAPSSKSTSGGTAAL			13	1444.76	S2_3A3Fab_complex	16.667	1445.98	0.870757	0.414634	0.944044	6.2514	0.001439
P00001	149	164	PLAPSSKSTSGGTAAL			13	1444.76	S2_3A3Fab_complex	166.667	1445.98	1.73337	0.411719	1.77132	6.3322	0.023745
P00001	149	164	PLAPSSKSTSGGTAAL			13	1444.76	S2_Alone	0	1445.57	0.364695	0	0	6.27828	0.025535
P00001	149	164	PLAPSSKSTSGGTAAL			13	1444.76	S2_Alone	0.167	1445.67	0.226205	0.108612	0.429151	6.32707	0.03007
P00001	149	164	PLAPSSKSTSGGTAAL			13	1444.76	S2_Alone	1.667	1445.7	1.04785	0.133547	1.1095	6.38199	0.001189
P00001	149	164	PLAPSSKSTSGGTAAL			13	1444.76	S2_Alone	16.667	1445.67	0.231582	0.101305	0.43201	6.35902	0.017552
P00001	149	164	PLAPSSKSTSGGTAAL			13	1444.76	S2_Alone	166.667	1445.8	0.081846	0.229693	0.373766	6.26405	0.042922
P00001	149	164	PLAPSSKSTSGGTAAL			13	1444.76	S2_FL_complex	0	1445.57	0.364695	0	0	6.27828	0.025535
P00001	149	164	PLAPSSKSTSGGTAAL			13	1444.76	S2_FL_complex	0.167	1446.94	0.59515	1.37013	0.698002	6.34369	0.052535
P00001	149	164	PLAPSSKSTSGGTAAL			13	1444.76	S2_FL_complex	1.667	1447.64	1.15861	2.07225	1.21465	6.33666	0.031217
P00001	149	164	PLAPSSKSTSGGTAAL			13	1444.76	S2_FL_complex	16.667	1447.25	1.11744	1.68518	1.17544	6.31625	0.061314
P00001	149	164	PLAPSSKSTSGGTAAL			13	1444.76	S2_FL_complex	166.667	1448.83	0.938004	3.26569	1.00641	6.30157	0.035682
P00001	158	167	SGGTAALGCL			9	849.413	S2_3A3Fab_complex	0	849.822	0.016815	0	0	7.90417	0.018592
P00001	158	167	SGGTAALGCL			9	849.413	S2_3A3Fab_complex	0.167	851.476	0.053971	1.65429	0.056529	7.92636	0.002386
P00001	158	167	SGGTAALGCL			9	849.413	S2_3A3Fab_complex	1.667	851.764	0.015324	1.94245	0.02275	7.92342	0.010617
P00001	158	167	SGGTAALGCL			9	849.413	S2_3A3Fab_complex	16.667	851.809	0.042552	1.98717	0.045753	7.90576	0.016359
P00001	158	167	SGGTAALGCL			9	849.413	S2_3A3Fab_complex	166.667	851.891	0.021953	2.06927	0.027653	7.91947	0.012314
P00001	158	167	SGGTAALGCL			9	849.413	S2_Alone	0	849.822	0.016815	0	0	7.90417	0.018592
P00001	158	167	SGGTAALGCL			9	849.413	S2_Alone	0.167	851.446	0.016915	1.62437	0.02385	7.90311	0.017541
P00001	158	167	SGGTAALGCL			9	849.413	S2_Alone	1.667	851.722	0.016338	1.89965	0.023445	7.91011	0.02168
P00001	158	167	SGGTAALGCL			9	849.413	S2_Alone	16.667	851.792	0.031085	1.96997	0.035341	7.92501	0.007406
P00001	158	167	SGGTAALGCL			9	849.413	S2_Alone	166.667	851.864	0.04458	2.04232	0.047646	7.90152	0.021198
P00001	158	167	SGGTAALGCL			9	849.413	S2_FL_complex	0	849.822	0.016815	0	0	7.90417	0.018592
P00001	158	167	SGGTAALGCL			9	849.413	S2_FL_complex	0.167	851.47	0.01612	1.64824	0.023293	7.91235	0.021318
P00001	158	167	SGGTAALGCL			9	849.413	S2_FL_complex	1.667	851.741	0.031641	1.91942	0.035832	7.91756	0.010563
P00001	158	167	SGGTAALGCL			9	849.413	S2_FL_complex	16.667	851.796	0.03051	1.97398	0.034837	7.90827	0.02351
P00001	158	167	SGGTAALGCL			9	849.413	S2_FL_complex	166.667	851.892	0.0594	2.07007	0.061734	7.90018	0.012465
P00001	168	177	VKDYFPEPVT			7	1194.6	S2_3A3Fab_complex	0	1195.28	0.121532	0	0	7.08221	0.020004
P00001	168	177	VKDYFPEPVT			7	1194.6	S2_3A3Fab_complex	0.167	1195.53	0.432274	0.247478	0.449033	7.13249	0.010401
P00001	168	177	VKDYFPEPVT			7	1194.6	S2_3A3Fab_complex	1.667	1195.18	0.029555	-0.10075	0.125074	7.10611	0.001663
P00001	168	177	VKDYFPEPVT			7	1194.6	S2_3A3Fab_complex	16.667	1195.58	0.299187	0.299353	0.322929	7.12661	0.001723
P00001	168	177	VKDYFPEPVT			7	1194.6	S2_3A3Fab_complex	166.667	1197.64	3.64721	2.35882	3.64923	7.12865	0.013818
P00001	168	177	VKDYFPEPVT			7	1194.6	S2_Alone	0	1195.28	0.121532	0	0	7.08221	0.020004
P00001	168	177	VKDYFPEPVT			7	1194.6	S2_Alone	0.167	1197.31	2.67443	2.02814	2.67719	7.10954	0.022513
P00001	168	177	VKDYFPEPVT			7	1194.6	S2_Alone	1.667	1197.97	2.52954	2.69051	2.53246	7.12459	0.002494
P00001	168	177	VKDYFPEPVT			7	1194.6	S2_Alone	16.667	1195.52	0.960567	0.24313	0.968225	7.1345	0.022005
P00001	168	177	VKDYFPEPVT			7	1194.6	S2_Alone	166.667	1195.56	1.18568	0.284476	1.19189	7.06788	0.020995
P00001	168	177	VKDYFPEPVT			7	1194.6	S2_FL_complex	0	1195.28	0.121532	0	0	7.08221	0.020004
P00001	168	177	VKDYFPEPVT			7	1194.6	S2_FL_complex	0.167	1195.66	0.032549	0.385613	0.125815	7.14079	0.011563
P00001	168	177	VKDYFPEPVT			7	1194.6	S2_FL_complex	1.667	1196.51	0.156974	1.23502	0.198522	7.12804	0.014346
P00001	168	177	VKDYFPEPVT			7	1194.6	S2_FL_complex	16.667	1197.1	0.13912	1.82584	0.184728	7.13655	0.004516
P00001	168	177	VKDYFPEPVT			7	1194.6	S2_FL_complex	166.667	1197.61	0.195736	2.32943	0.230396	7.11468	0.007439
P00001	178	196	VSWNSGALTSGVHTFPAVL			17	1943	S2_3A3Fab_complex	0	1944.47	0.325348	0	0	7.90428	0.00576
P00001	178	196	VSWNSGALTSGVHTFPAVL			17	1943	S2_3A3Fab_complex	0.167	1944.48	0.022872	0.010304	0.326151	7.93076	0.001718
P00001	178	196	VSWNSGALTSGVHTFPAVL			17	1943	S2_3A3Fab_complex	1.667	1944.7	0.080619	0.232592	0.335187	7.92488	0.010539
P00001	178	196	VSWNSGALTSGVHTFPAVL			17	1943	S2_3A3Fab_complex	16.667	1944.77	0.097145	0.297807	0.339541	7.92019	0.009925
P00001	178	196	VSWNSGALTSGVHTFPAVL			17	1943	S2_3A3Fab_complex	166.667	1944.73	0.186632	0.26364	0.375077	7.92334	0.014145
P00001	178	196	VSWNSGALTSGVHTFPAVL			17	1943	S2_Alone	0	1944.47	0.325348	0	0	7.90428	0.00576
P00001	178	196	VSWNSGALTSGVHTFPAVL			17	1943	S2_Alone	0.167	1944.66	0.192692	0.192146	0.378129	7.91222	0.013183
P00001	178	196	VSWNSGALTSGVHTFPAVL			17	1943	S2_Alone	1.667	1944.7	0.162407	0.229533	0.36363	7.92727	0.006334
P00001	178	196	VSWNSGALTSGVHTFPAVL			17	1943	S2_Alone	16.667	1944.63	0.058465	0.162351	0.330559	7.92448	0.005616
P00001	178	196	VSWNSGALTSGVHTFPAVL			17	1943	S2_Alone	166.667	1944.63	0.160212	0.160524	0.362655	7.90144	0.017364
P00001	178	196	VSWNSGALTSGVHTFPAVL			17	1943	S2_FL_complex	0	1944.47	0.325348	0	0	7.90428	0.00576
P00001	178	196	VSWNSGALTSGVHTFPAVL			17	1943	S2_FL_complex	0.167	1947.39	1.18923	2.9198	1.23293	7.91569	0.016381
P00001	178	196	VSWNSGALTSGVHTFPAVL			17	1943	S2_FL_complex	1.667	1948.01	2.12512	3.53943	2.14988	7.9102	0.010387
P00001	178	196	VSWNSGALTSGVHTFPAVL			17	1943	S2_FL_complex	16.667	1947.61	1.64538	3.14189	1.67724	7.91413	0.017904
P00001	178	196	VSWNSGALTSGVHTFPAVL			17	1943	S2_FL_complex	166.667	1950.19	0.752271	5.72052	0.819611	7.90166	0.010895
P00001	181	196	NSGALTSGVHTFPAVL			14	1570.82	S2_3A3Fab_complex	0	1573.81	1.36104	0	0	7.51094	0.044301
P00001	181	196	NSGALTSGVHTFPAVL			14	1570.82	S2_3A3Fab_complex	0.167	1576.89	0.168498	3.07363	1.37143	7.5438	0.002708
P00001	181	196	NSGALTSGVHTFPAVL			14	1570.82	S2_3A3Fab_complex	16.667	1577.39	0.579223	3.57489	1.47917	7.5419	0.000145
P00001	181	196	NSGALTSGVHTFPAVL			14	1570.82	S2_Alone	0	1573.86	1.32993	0	0	7.5097	0.043131
P00001	181	196	NSGALTSGVHTFPAVL			14	1570.82	S2_Alone	1.667	1577.24	0.177904	3.37493	1.34178	7.52714	0.011433
P00001	181	196	NSGALTSGVHTFPAVL			14	1570.82	S2_Alone	16.667	1578.02	0.21834	4.15531	1.34773	7.53923	0.007599
P00001	181	196	NSGALTSGVHTFPAVL			14	1570.82	S2_Alone	166.667	1579.19	0.243335	5.32802	1.35201	7.54316	0.002725
P00001	181	196	NSGALTSGVHTFPAVL			14	1570.82	S2_FL_complex	0	1573.86	1.32993	0	0	7.5097	0.043131
P00001	181	196	NSGALTSGVHTFPAVL			14	1570.82	S2_FL_complex	0.167	1575.68	0	1.82188	1.32993	7.53663	0
P00001	181	196	NSGALTSGVHTFPAVL			14	1570.82	S2_FL_complex	1.667	1576.42	0	2.55823	1.32993	7.58336	0
P00001	181	196	NSGALTSGVHTFPAVL			14	1570.82	S2_FL_complex	16.667	1576.64	0.466486	2.78231	1.40937	7.59278	0.008987
P00001	181	196	NSGALTSGVHTFPAVL			14	1570.82	S2_FL_complex	166.667	1577.63	0.149366	3.77286	1.33829	7.55857	0.020146
P00001	264	274	LFPPKPKDTLM			7	1286.72	S2_3A3Fab_complex	0	1287.45	0.117424	0	0	6.68463	0.025852
P00001	264	274	LFPPKPKDTLM			7	1286.72	S2_3A3Fab_complex	0.167	1287.42	0.167904	-0.029127	0.204891	6.74012	0.005497
P00001	264	274	LFPPKPKDTLM			7	1286.72	S2_3A3Fab_complex	1.667	1287.73	0.342581	0.277957	0.362146	6.74525	0.008564
P00001	264	274	LFPPKPKDTLM			7	1286.72	S2_3A3Fab_complex	16.667	1287.79	0.091656	0.344312	0.14896	6.72177	0.037311
P00001	264	274	LFPPKPKDTLM			7	1286.72	S2_3A3Fab_complex	166.667	1287.75	0.758112	0.299275	0.767152	6.74286	0.025953
P00001	264	274	LFPPKPKDTLM			7	1286.72	S2_Alone	0	1287.45	0.117424	0	0	6.68463	0.025852
P00001	264	274	LFPPKPKDTLM			7	1286.72	S2_Alone	0.167	1287.47	0.111423	0.02347	0.161875	6.70305	0.042748
P00001	264	274	LFPPKPKDTLM			7	1286.72	S2_Alone	1.667	1287.6	0.492626	0.154288	0.506428	6.76214	0.023655
P00001	264	274	LFPPKPKDTLM			7	1286.72	S2_Alone	16.667	1287.64	0.343496	0.194385	0.363013	6.74977	0.01699
P00001	264	274	LFPPKPKDTLM			7	1286.72	S2_Alone	166.667	1287.66	0.414177	0.212908	0.430501	6.67783	0.030701
P00001	264	274	LFPPKPKDTLM			7	1286.72	S2_FL_complex	0	1287.45	0.117424	0	0	6.68463	0.025852
P00001	264	274	LFPPKPKDTLM			7	1286.72	S2_FL_complex	0.167	1289.02	0.054649	1.57684	0.129518	6.72992	0.042476
P00001	264	274	LFPPKPKDTLM			7	1286.72	S2_FL_complex	1.667	1290.26	0.096908	2.81173	0.152249	6.74105	0.014168
P00001	264	274	LFPPKPKDTLM			7	1286.72	S2_FL_complex	16.667	1290.86	0.079999	3.40849	0.142086	6.7221	0.046407
P00001	264	274	LFPPKPKDTLM			7	1286.72	S2_FL_complex	166.667	1290.81	0.085534	3.36095	0.145274	6.72556	0.009101
P00001	266	274	PPKPKDTLM			5	1026.57	S2_3A3Fab_complex	0	1027.09	0.054482	0	0	6.68648	0.029285
P00001	266	274	PPKPKDTLM			5	1026.57	S2_3A3Fab_complex	0.167	1027.32	0.244535	0.228749	0.250531	6.74801	0.009747
P00001	266	274	PPKPKDTLM			5	1026.57	S2_3A3Fab_complex	1.667	1027.45	0.296318	0.35755	0.301284	6.7402	0.013002
P00001	266	274	PPKPKDTLM			5	1026.57	S2_3A3Fab_complex	16.667	1027.57	0.088891	0.484218	0.104258	6.74641	0.004336
P00001	266	274	PPKPKDTLM			5	1026.57	S2_3A3Fab_complex	166.667	1027.41	0.272959	0.321787	0.278343	6.75843	0.016679
P00001	266	274	PPKPKDTLM			5	1026.57	S2_Alone	0	1027.09	0.054482	0	0	6.68648	0.029285
P00001	266	274	PPKPKDTLM			5	1026.57	S2_Alone	0.167	1032.7	2.49715	5.61154	2.49774	6.64618	0.03829
P00001	266	274	PPKPKDTLM			5	1026.57	S2_Alone	1.667	1027.3	0.064428	0.212811	0.084376	6.77097	0.010734
P00001	266	274	PPKPKDTLM			5	1026.57	S2_Alone	16.667	1027.31	0.116939	0.222609	0.129008	6.75479	0.019295
P00001	266	274	PPKPKDTLM			5	1026.57	S2_Alone	166.667	1027.37	0.12555	0.275846	0.136862	6.67706	0.036345
P00001	266	274	PPKPKDTLM			5	1026.57	S2_FL_complex	0	1027.09	0.054482	0	0	6.68648	0.029285
P00001	266	274	PPKPKDTLM			5	1026.57	S2_FL_complex	0.167	1028.51	0.062504	1.42112	0.082916	6.73364	0.040964
P00001	266	274	PPKPKDTLM			5	1026.57	S2_FL_complex	1.667	1029.53	0.124731	2.43567	0.13611	6.74717	0.016645
P00001	266	274	PPKPKDTLM			5	1026.57	S2_FL_complex	16.667	1030	0.089732	2.90897	0.104976	6.72613	0.046674
P00001	266	274	PPKPKDTLM			5	1026.57	S2_FL_complex	166.667	1030.01	0.095307	2.91673	0.10978	6.71412	0.032434
P00002	24	37	TQSAPSVPVTPGES			10	1356.66	S2_3A3Fab_complex	0	1357.33	0.143702	0	0	6.31631	0.028724
P00002	24	37	TQSAPSVPVTPGES			10	1356.66	S2_3A3Fab_complex	0.167	1361.16	0.050937	3.83409	0.152463	6.38898	0.002123
P00002	24	37	TQSAPSVPVTPGES			10	1356.66	S2_3A3Fab_complex	1.667	1361.88	0.027751	4.55275	0.146357	6.38923	0.00741
P00002	24	37	TQSAPSVPVTPGES			10	1356.66	S2_3A3Fab_complex	16.667	1362.6	0.249975	5.27095	0.288336	6.34811	0.051183
P00002	24	37	TQSAPSVPVTPGES			10	1356.66	S2_3A3Fab_complex	166.667	1362.65	0.559853	5.32078	0.578002	6.38227	0.005689
P00002	24	37	TQSAPSVPVTPGES			10	1356.66	S2_Alone	0	1357.32	0.037597	0	0	6.31776	0.029898
P00002	24	37	TQSAPSVPVTPGES			10	1356.66	S2_Alone	0.167	1358.12	0.246282	0.798666	0.249135	6.37326	0.019447
P00002	24	37	TQSAPSVPVTPGES			10	1356.66	S2_Alone	1.667	1358.86	1.20529	1.54314	1.20588	6.38888	0.03323
P00002	24	37	TQSAPSVPVTPGES			10	1356.66	S2_Alone	16.667	1358.5	0.373187	1.18232	0.375076	6.38365	0.00657
P00002	24	37	TQSAPSVPVTPGES			10	1356.66	S2_Alone	166.667	1358.04	0.168639	0.724116	0.172779	6.30391	0.034885
P00002	24	37	TQSAPSVPVTPGES			10	1356.66	S2_FL_complex	0	1357.32	0.037597	0	0	6.31776	0.029898
P00002	24	37	TQSAPSVPVTPGES			10	1356.66	S2_FL_complex	0.167	1360.99	0.120113	3.66587	0.12586	6.35356	0.048287
P00002	24	37	TQSAPSVPVTPGES			10	1356.66	S2_FL_complex	1.667	1361.86	0.290536	4.53995	0.292958	6.37936	0.011389
P00002	24	37	TQSAPSVPVTPGES			10	1356.66	S2_FL_complex	16.667	1362.43	0.058052	5.10493	0.069163	6.35964	0.053869
P00002	24	37	TQSAPSVPVTPGES			10	1356.66	S2_FL_complex	166.667	1362.57	0.147783	5.25274	0.152491	6.34514	0.038663
P00002	31	37	PVTPGES			4	686.336	S2_3A3Fab_complex	0	686.711	0.530779	0	0	6.31111	0.034344
P00002	31	37	PVTPGES			4	686.336	S2_3A3Fab_complex	0.167	688.662	0.495495	1.95139	0.726114	6.39775	0.002826
P00002	31	37	PVTPGES			4	686.336	S2_3A3Fab_complex	1.667	689.024	0.525928	2.31325	0.747212	6.39456	0.005348
P00002	31	37	PVTPGES			4	686.336	S2_3A3Fab_complex	16.667	689.234	0.152365	2.52266	0.552215	6.34489	0.046201
P00002	31	37	PVTPGES			4	686.336	S2_3A3Fab_complex	166.667	689.239	0.046851	2.52768	0.532842	6.39226	0.004192
P00002	31	37	PVTPGES			4	686.336	S2_Alone	0	686.711	0.530779	0	0	6.31111	0.034344
P00002	31	37	PVTPGES			4	686.336	S2_Alone	0.167	688.195	1.34064	1.4839	1.44189	6.29887	0.047849
P00002	31	37	PVTPGES			4	686.336	S2_Alone	1.667	688.414	1.32114	1.70312	1.42377	6.28196	0.049252
P00002	31	37	PVTPGES			4	686.336	S2_Alone	16.667	687.591	1.08603	0.880547	1.20879	6.36831	0.027382
P00002	31	37	PVTPGES			4	686.336	S2_Alone	166.667	686.788	0.103346	0.077206	0.540746	6.31215	0.050356
P00002	31	37	PVTPGES			4	686.336	S2_FL_complex	0	686.711	0.530779	0	0	6.31111	0.034344
P00002	31	37	PVTPGES			4	686.336	S2_FL_complex	0.167	688.356	0.077938	1.64498	0.53647	6.35222	0.048767
P00002	31	37	PVTPGES			4	686.336	S2_FL_complex	1.667	688.759	0.112339	2.04829	0.542537	6.37688	0.014962
P00002	31	37	PVTPGES			4	686.336	S2_FL_complex	16.667	689.164	0.049009	2.45343	0.533036	6.35964	0.054279
P00002	31	37	PVTPGES			4	686.336	S2_FL_complex	166.667	689.234	0.070317	2.52353	0.535416	6.34331	0.037952
P00002	60	70	FLQRPGQSPQL			8	1270.69	S2_3A3Fab_complex	0	1271.37	0.039665	0	0	6.75654	0.03017
P00002	60	70	FLQRPGQSPQL			8	1270.69	S2_3A3Fab_complex	0.167	1273.64	0.126172	2.26812	0.13226	6.82045	0.003906
P00002	60	70	FLQRPGQSPQL			8	1270.69	S2_3A3Fab_complex	1.667	1274.01	0.124747	2.63558	0.130901	6.81649	0.008067
P00002	60	70	FLQRPGQSPQL			8	1270.69	S2_3A3Fab_complex	16.667	1274.67	0.103905	3.29978	0.111218	6.78428	0.038802
P00002	60	70	FLQRPGQSPQL			8	1270.69	S2_3A3Fab_complex	166.667	1274.65	1.0905	3.27707	1.09122	6.82548	0.032463
P00002	60	70	FLQRPGQSPQL			8	1270.69	S2_Alone	0	1271.37	0.039665	0	0	6.75654	0.03017
P00002	60	70	FLQRPGQSPQL			8	1270.69	S2_Alone	0.167	1274.87	2.11824	3.50073	2.11862	6.72746	0.052876
P00002	60	70	FLQRPGQSPQL			8	1270.69	S2_Alone	1.667	1274.29	2.29008	2.92031	2.29043	6.7605	0.075379
P00002	60	70	FLQRPGQSPQL			8	1270.69	S2_Alone	16.667	1272.41	0.415598	1.0392	0.417487	6.81485	0.01045
P00002	60	70	FLQRPGQSPQL			8	1270.69	S2_Alone	166.667	1273.02	2.15223	1.65	2.1526	6.76065	0.040376
P00002	60	70	FLQRPGQSPQL			8	1270.69	S2_FL_complex	0	1271.37	0.039665	0	0	6.75654	0.03017
P00002	60	70	FLQRPGQSPQL			8	1270.69	S2_FL_complex	0.167	1273.45	0.041616	2.08221	0.057491	6.79795	0.04085
P00002	60	70	FLQRPGQSPQL			8	1270.69	S2_FL_complex	1.667	1273.79	0.112584	2.42313	0.119366	6.81523	0.015158
P00002	60	70	FLQRPGQSPQL			8	1270.69	S2_FL_complex	16.667	1274.71	0.658276	3.33921	0.65947	6.82624	0.011551
P00002	60	70	FLQRPGQSPQL			8	1270.69	S2_FL_complex	166.667	1275.28	0.859754	3.91236	0.860668	6.78622	0.012132
P00002	61	70	LQRPGQSPQL			7	1123.62	S2_3A3Fab_complex	0	1124.13	0.038811	0	0	6.35566	0.032817
P00002	61	70	LQRPGQSPQL			7	1123.62	S2_3A3Fab_complex	0.167	1126.24	0.070983	2.11325	0.080901	6.4312	0.00435
P00002	61	70	LQRPGQSPQL			7	1123.62	S2_3A3Fab_complex	1.667	1126.55	0.076714	2.41721	0.085973	6.42973	0.008636
P00002	61	70	LQRPGQSPQL			7	1123.62	S2_3A3Fab_complex	16.667	1127.4	0.406756	3.27184	0.408603	6.38749	0.048743
P00002	61	70	LQRPGQSPQL			7	1123.62	S2_3A3Fab_complex	166.667	1127.92	0.575429	3.78689	0.576736	6.42843	0.010551
P00002	61	70	LQRPGQSPQL			7	1123.62	S2_Alone	0	1124.13	0.038811	0	0	6.35566	0.032817
P00002	61	70	LQRPGQSPQL			7	1123.62	S2_Alone	0.167	1124.68	0.171254	0.552307	0.175597	6.41	0.019217
P00002	61	70	LQRPGQSPQL			7	1123.62	S2_Alone	1.667	1125.13	1.11427	0.999799	1.11495	6.41871	0.040613
P00002	61	70	LQRPGQSPQL			7	1123.62	S2_Alone	16.667	1125.25	0.389805	1.11902	0.391733	6.42318	0.007347
P00002	61	70	LQRPGQSPQL			7	1123.62	S2_Alone	166.667	1124.89	0.429753	0.762481	0.431502	6.34185	0.030664
P00002	61	70	LQRPGQSPQL			7	1123.62	S2_FL_complex	0	1124.13	0.038811	0	0	6.35566	0.032817
P00002	61	70	LQRPGQSPQL			7	1123.62	S2_FL_complex	0.167	1126.14	0.053914	2.0141	0.066431	6.39702	0.048405
P00002	61	70	LQRPGQSPQL			7	1123.62	S2_FL_complex	1.667	1126.74	0.574807	2.60846	0.576116	6.4182	0.011102
P00002	61	70	LQRPGQSPQL			7	1123.62	S2_FL_complex	16.667	1127.39	0.577883	3.25873	0.579184	6.39015	0.056061
P00002	61	70	LQRPGQSPQL			7	1123.62	S2_FL_complex	166.667	1127.75	0.115705	3.61559	0.122041	6.39004	0.037182
P00002	79	94	ASGVPDRFSGSGSGTA			14	1452.67	S2_3A3Fab_complex	0	1453.36	0.063161	0	0	6.25173	0.032785
P00002	79	94	ASGVPDRFSGSGSGTA			14	1452.67	S2_3A3Fab_complex	0.167	1457.79	0.10765	4.43229	0.124811	6.32021	0.003224
P00002	79	94	ASGVPDRFSGSGSGTA			14	1452.67	S2_3A3Fab_complex	1.667	1458.49	0.091645	5.13705	0.111302	6.31941	0.009826
P00002	79	94	ASGVPDRFSGSGSGTA			14	1452.67	S2_3A3Fab_complex	16.667	1459.53	0.060494	6.17209	0.087458	6.34134	0.000842
P00002	79	94	ASGVPDRFSGSGSGTA			14	1452.67	S2_3A3Fab_complex	166.667	1460.21	0.399281	6.8559	0.404246	6.32606	0.016276
P00002	79	94	ASGVPDRFSGSGSGTA			14	1452.67	S2_Alone	0	1453.36	0.063161	0	0	6.25173	0.032785
P00002	79	94	ASGVPDRFSGSGSGTA			14	1452.67	S2_Alone	0.167	1458.64	6.51303	5.28491	6.51333	6.32744	0.016294
P00002	79	94	ASGVPDRFSGSGSGTA			14	1452.67	S2_Alone	1.667	1456.65	6.15678	3.29379	6.1571	6.31707	0.028177
P00002	79	94	ASGVPDRFSGSGSGTA			14	1452.67	S2_Alone	16.667	1454.89	0.836539	1.53513	0.83892	6.32148	0.009594
P00002	79	94	ASGVPDRFSGSGSGTA			14	1452.67	S2_Alone	166.667	1454.45	1.49809	1.08981	1.49942	6.26355	0.048286
P00002	79	94	ASGVPDRFSGSGSGTA			14	1452.67	S2_FL_complex	0	1453.36	0.063161	0	0	6.25173	0.032785
P00002	79	94	ASGVPDRFSGSGSGTA			14	1452.67	S2_FL_complex	0.167	1458.23	1.04407	4.87796	1.04598	6.31808	0.012658
P00002	79	94	ASGVPDRFSGSGSGTA			14	1452.67	S2_FL_complex	1.667	1458.24	0.218278	4.88821	0.227233	6.30676	0.015051
P00002	79	94	ASGVPDRFSGSGSGTA			14	1452.67	S2_FL_complex	16.667	1459.08	0.065859	5.72693	0.091251	6.33176	0.006243
P00002	79	94	ASGVPDRFSGSGSGTA			14	1452.67	S2_FL_complex	166.667	1459.54	0.617372	6.18867	0.620594	6.30277	0.005565
P00002	79	95	ASGVPDRFSGSGSGTAF			15	1599.74	S2_3A3Fab_complex	0	1600.57	0.262135	0	0	6.97791	0.026016
P00002	79	95	ASGVPDRFSGSGSGTAF			15	1599.74	S2_3A3Fab_complex	0.167	1605.15	0.02964	4.57735	0.263806	7.03165	0.002234
P00002	79	95	ASGVPDRFSGSGSGTAF			15	1599.74	S2_3A3Fab_complex	1.667	1606.01	0.123524	5.44278	0.289781	7.02879	0.011445
P00002	79	95	ASGVPDRFSGSGSGTAF			15	1599.74	S2_3A3Fab_complex	16.667	1606.61	0.371634	6.03629	0.454782	7.04129	0.003845
P00002	79	95	ASGVPDRFSGSGSGTAF			15	1599.74	S2_3A3Fab_complex	166.667	1607.4	0.134699	6.83357	0.294718	7.03275	0.012678
P00002	79	95	ASGVPDRFSGSGSGTAF			15	1599.74	S2_Alone	0	1600.55	0.04562	0	0	6.97744	0.02548
P00002	79	95	ASGVPDRFSGSGSGTAF			15	1599.74	S2_Alone	0.167	1601.39	0.254252	0.845803	0.258312	7.01234	0.021338
P00002	79	95	ASGVPDRFSGSGSGTAF			15	1599.74	S2_Alone	1.667	1605.93	3.67688	5.38173	3.67716	7.0448	0.008656
P00002	79	95	ASGVPDRFSGSGSGTAF			15	1599.74	S2_Alone	16.667	1601.93	0.50025	1.38214	0.502326	7.03242	0.012433
P00002	79	95	ASGVPDRFSGSGSGTAF			15	1599.74	S2_Alone	166.667	1602.34	1.92097	1.79547	1.92151	6.99573	0.042283
P00002	79	95	ASGVPDRFSGSGSGTAF			15	1599.74	S2_FL_complex	0	1600.55	0.04562	0	0	6.97744	0.02548
P00002	79	95	ASGVPDRFSGSGSGTAF			15	1599.74	S2_FL_complex	0.167	1605.14	0.336847	4.59149	0.339922	7.03174	0.002067
P00002	79	95	ASGVPDRFSGSGSGTAF			15	1599.74	S2_FL_complex	1.667	1605.72	0.178388	5.17619	0.184129	7.02631	0.017282
P00002	79	95	ASGVPDRFSGSGSGTAF			15	1599.74	S2_FL_complex	16.667	1606.51	0.31483	5.95748	0.318118	7.03798	0.002144
P00002	79	95	ASGVPDRFSGSGSGTAF			15	1599.74	S2_FL_complex	166.667	1607.35	0.136991	6.80275	0.144388	6.99265	0.022764
P00002	79	96	ASGVPDRFSGSGSGTAFT			16	1700.79	S2_3A3Fab_complex	0	1702.18	1.39632	0	0	6.81754	0.028825
P00002	79	96	ASGVPDRFSGSGSGTAFT			16	1700.79	S2_3A3Fab_complex	0.167	1712.4	2.57709	10.2179	2.93106	6.75256	0.019557
P00002	79	96	ASGVPDRFSGSGSGTAFT			16	1700.79	S2_3A3Fab_complex	1.667	1707.33	0.30887	5.15567	1.43007	6.86198	0.008557
P00002	79	96	ASGVPDRFSGSGSGTAFT			16	1700.79	S2_3A3Fab_complex	16.667	1708.35	0.1222	6.16812	1.40166	6.84468	0.040555
P00002	79	96	ASGVPDRFSGSGSGTAFT			16	1700.79	S2_3A3Fab_complex	166.667	1709.63	0.496573	7.45214	1.48199	6.87033	0.004044
P00002	79	96	ASGVPDRFSGSGSGTAFT			16	1700.79	S2_Alone	0	1702.18	1.39632	0	0	6.81754	0.028825
P00002	79	96	ASGVPDRFSGSGSGTAFT			16	1700.79	S2_Alone	0.167	1702.88	0.606234	0.703997	1.52224	6.85473	0.015657
P00002	79	96	ASGVPDRFSGSGSGTAFT			16	1700.79	S2_Alone	1.667	1703.41	2.10365	1.23241	2.52489	6.88634	0.025636
P00002	79	96	ASGVPDRFSGSGSGTAFT			16	1700.79	S2_Alone	16.667	1707.22	6.06553	5.04127	6.22417	6.82649	0.038352
P00002	79	96	ASGVPDRFSGSGSGTAFT			16	1700.79	S2_Alone	166.667	1702.92	1.05859	0.747161	1.75223	6.80392	0.033323
P00002	79	96	ASGVPDRFSGSGSGTAFT			16	1700.79	S2_FL_complex	0	1702.18	1.39632	0	0	6.81754	0.028825
P00002	79	96	ASGVPDRFSGSGSGTAFT			16	1700.79	S2_FL_complex	0.167	1712.68	0.5873	10.5038	1.5148	6.80938	0.06958
P00002	79	96	ASGVPDRFSGSGSGTAFT			16	1700.79	S2_FL_complex	1.667	1706.88	0.353673	4.70515	1.44041	6.84437	0.002849
P00002	79	96	ASGVPDRFSGSGSGTAFT			16	1700.79	S2_FL_complex	16.667	1714.83	1.02279	12.6557	1.73084	6.81394	0.017367
P00002	79	96	ASGVPDRFSGSGSGTAFT			16	1700.79	S2_FL_complex	166.667	1709.68	0.467214	7.50522	1.47241	6.86243	0.006389
P00002	95	109	FTLRISRVEAEDVGV			14	1690.91	S2_3A3Fab_complex	0	1691.69	0.203109	0	0	7.20529	0.018762
P00002	95	109	FTLRISRVEAEDVGV			14	1690.91	S2_3A3Fab_complex	0.167	1693.44	0.146035	1.74785	0.250159	7.23939	0.001307
P00002	95	109	FTLRISRVEAEDVGV			14	1690.91	S2_3A3Fab_complex	1.667	1700.44	0.757567	8.74591	0.784322	7.2367	0.030341
P00002	95	109	FTLRISRVEAEDVGV			14	1690.91	S2_3A3Fab_complex	16.667	1694.6	1.06163	2.91428	1.08088	7.24429	0.014943
P00002	95	109	FTLRISRVEAEDVGV			14	1690.91	S2_3A3Fab_complex	166.667	1695.51	1.15372	3.81977	1.17147	7.23414	0.014822
P00002	95	109	FTLRISRVEAEDVGV			14	1690.91	S2_Alone	0	1691.69	0.203109	0	0	7.20529	0.018762
P00002	95	109	FTLRISRVEAEDVGV			14	1690.91	S2_Alone	0.167	1693.02	0.503989	1.32565	0.543377	7.22762	0.012112
P00002	95	109	FTLRISRVEAEDVGV			14	1690.91	S2_Alone	1.667	1693.36	2.65945	1.66907	2.66719	7.22742	0.010137
P00002	95	109	FTLRISRVEAEDVGV			14	1690.91	S2_Alone	16.667	1693.06	0.350337	1.3652	0.404955	7.24356	0.008613
P00002	95	109	FTLRISRVEAEDVGV			14	1690.91	S2_Alone	166.667	1692.97	0.288175	1.28049	0.352559	7.18735	0.029718
P00002	95	109	FTLRISRVEAEDVGV			14	1690.91	S2_FL_complex	0	1691.69	0.203109	0	0	7.20529	0.018762
P00002	95	109	FTLRISRVEAEDVGV			14	1690.91	S2_FL_complex	0.167	1693.46	0.041867	1.76656	0.207379	7.22111	0.032818
P00002	95	109	FTLRISRVEAEDVGV			14	1690.91	S2_FL_complex	1.667	1694.13	0.400711	2.43587	0.449247	7.21828	0.006562
P00002	95	109	FTLRISRVEAEDVGV			14	1690.91	S2_FL_complex	16.667	1694.48	0.326639	2.7944	0.384638	7.19468	0.036116
P00002	95	109	FTLRISRVEAEDVGV			14	1690.91	S2_FL_complex	166.667	1695.39	0.046281	3.69821	0.208315	7.20424	0.020341
P00002	116	130	LEYPLTFGAGTKLEL			13	1651.89	S2_3A3Fab_complex	0	1652.97	0.167159	0	0	8.03492	0.013336
P00002	116	130	LEYPLTFGAGTKLEL			13	1651.89	S2_3A3Fab_complex	0.167	1655.06	0.612954	2.09393	0.635338	8.02624	0.011591
P00002	116	130	LEYPLTFGAGTKLEL			13	1651.89	S2_3A3Fab_complex	1.667	1655.28	0.132922	2.30976	0.213565	8.0178	0.013357
P00002	116	130	LEYPLTFGAGTKLEL			13	1651.89	S2_3A3Fab_complex	16.667	1656.04	0.188899	3.0684	0.25224	8.01396	0.014879
P00002	116	130	LEYPLTFGAGTKLEL			13	1651.89	S2_3A3Fab_complex	166.667	1657.19	0.124624	4.2191	0.208502	8.02079	0.018282
P00002	116	130	LEYPLTFGAGTKLEL			13	1651.89	S2_Alone	0	1652.97	0.167159	0	0	8.03492	0.013336
P00002	116	130	LEYPLTFGAGTKLEL			13	1651.89	S2_Alone	0.167	1654.51	0.338919	1.54374	0.3779	8.02119	0.017827
P00002	116	130	LEYPLTFGAGTKLEL			13	1651.89	S2_Alone	1.667	1654.72	0.695435	1.75372	0.715242	8.05477	0.007699
P00002	116	130	LEYPLTFGAGTKLEL			13	1651.89	S2_Alone	16.667	1654.13	0.36308	1.1602	0.399711	8.04891	0.008703
P00002	116	130	LEYPLTFGAGTKLEL			13	1651.89	S2_Alone	166.667	1654.09	0.257874	1.12171	0.307313	8.02841	0.016599
P00002	116	130	LEYPLTFGAGTKLEL			13	1651.89	S2_FL_complex	0	1652.97	0.167159	0	0	8.03492	0.013336
P00002	116	130	LEYPLTFGAGTKLEL			13	1651.89	S2_FL_complex	0.167	1655.2	0.674193	2.22985	0.694606	8.02059	0.016714
P00002	116	130	LEYPLTFGAGTKLEL			13	1651.89	S2_FL_complex	1.667	1655.98	0.964074	3.00911	0.978458	8.01533	0.020755
P00002	116	130	LEYPLTFGAGTKLEL			13	1651.89	S2_FL_complex	16.667	1655.82	0.105147	2.85498	0.197479	8.02194	0.014967
P00002	116	130	LEYPLTFGAGTKLEL			13	1651.89	S2_FL_complex	166.667	1656.87	0.116967	3.90442	0.204018	8.00562	0.010885
P00002	119	128	PLTFGAGTKL			8	1004.58	S2_3A3Fab_complex	0	1005.1	0.04628	0	0	7.28243	0.021807
P00002	119	128	PLTFGAGTKL			8	1004.58	S2_3A3Fab_complex	0.167	1006.44	0.030186	1.34479	0.055255	7.32141	0.002184
P00002	119	128	PLTFGAGTKL			8	1004.58	S2_3A3Fab_complex	1.667	1006.61	0.028986	1.51115	0.054608	7.31639	0.007933
P00002	119	128	PLTFGAGTKL			8	1004.58	S2_3A3Fab_complex	16.667	1007.23	0.074686	2.13317	0.087862	7.29413	0.030433
P00002	119	128	PLTFGAGTKL			8	1004.58	S2_3A3Fab_complex	166.667	1007.68	0.080868	2.58537	0.093175	7.31867	0.01402
P00002	119	128	PLTFGAGTKL			8	1004.58	S2_Alone	0	1005.1	0.04628	0	0	7.28243	0.021807
P00002	119	128	PLTFGAGTKL			8	1004.58	S2_Alone	0.167	1005.57	0.17161	0.473408	0.177741	7.30756	0.011781
P00002	119	128	PLTFGAGTKL			8	1004.58	S2_Alone	1.667	1005.71	0.115431	0.615129	0.124363	7.33834	0.005384
P00002	119	128	PLTFGAGTKL			8	1004.58	S2_Alone	16.667	1005.7	0.250673	0.602847	0.254909	7.31968	0.011103
P00002	119	128	PLTFGAGTKL			8	1004.58	S2_Alone	166.667	1005.54	0.089432	0.440571	0.100697	7.27932	0.028674
P00002	119	128	PLTFGAGTKL			8	1004.58	S2_FL_complex	0	1005.1	0.04628	0	0	7.28243	0.021807
P00002	119	128	PLTFGAGTKL			8	1004.58	S2_FL_complex	0.167	1006.43	0.025854	1.33413	0.053013	7.30917	0.032169
P00002	119	128	PLTFGAGTKL			8	1004.58	S2_FL_complex	1.667	1006.56	0.040736	1.46779	0.061655	7.31955	0.013112
P00002	119	128	PLTFGAGTKL			8	1004.58	S2_FL_complex	16.667	1007.17	0.025383	2.07073	0.052784	7.30331	0.03791
P00002	119	128	PLTFGAGTKL			8	1004.58	S2_FL_complex	166.667	1007.56	0.10582	2.4591	0.115498	7.29466	0.020757
P00002	119	130	PLTFGAGTKLEL			10	1246.7	S2_3A3Fab_complex	0	1247.71	0.613132	0	0	7.71116	0.012327
P00002	119	130	PLTFGAGTKLEL			10	1246.7	S2_3A3Fab_complex	0.167	1248.93	0.039119	1.21656	0.614379	7.73695	0.002448
P00002	119	130	PLTFGAGTKLEL			10	1246.7	S2_3A3Fab_complex	1.667	1249.24	0.118763	1.53272	0.624528	7.73149	0.010796
P00002	119	130	PLTFGAGTKLEL			10	1246.7	S2_3A3Fab_complex	16.667	1249.94	0.131028	2.23109	0.626976	7.71702	0.021141
P00002	119	130	PLTFGAGTKLEL			10	1246.7	S2_3A3Fab_complex	166.667	1251.03	0.098279	3.31402	0.620959	7.7325	0.009512
P00002	119	130	PLTFGAGTKLEL			10	1246.7	S2_Alone	0	1247.71	0.613132	0	0	7.71116	0.012327
P00002	119	130	PLTFGAGTKLEL			10	1246.7	S2_Alone	0.167	1248.94	0.385178	1.22444	0.724081	7.72513	0.012024
P00002	119	130	PLTFGAGTKLEL			10	1246.7	S2_Alone	1.667	1249	0.675272	1.28882	0.912099	7.74623	0.007298
P00002	119	130	PLTFGAGTKLEL			10	1246.7	S2_Alone	16.667	1248.57	0.254461	0.859986	0.663838	7.74181	0.008489
P00002	119	130	PLTFGAGTKLEL			10	1246.7	S2_Alone	166.667	1248.59	0.181612	0.873957	0.639464	7.71466	0.020053
P00002	119	130	PLTFGAGTKLEL			10	1246.7	S2_FL_complex	0	1247.71	0.613132	0	0	7.71116	0.012327
P00002	119	130	PLTFGAGTKLEL			10	1246.7	S2_FL_complex	0.167	1249.07	0.065624	1.35751	0.616634	7.71876	0.020656
P00002	119	130	PLTFGAGTKLEL			10	1246.7	S2_FL_complex	1.667	1249.2	0.012288	1.48478	0.613255	7.72832	0.00942
P00002	119	130	PLTFGAGTKLEL			10	1246.7	S2_FL_complex	16.667	1249.79	0.036941	2.07828	0.614244	7.72136	0.019336
P00002	119	130	PLTFGAGTKLEL			10	1246.7	S2_FL_complex	166.667	1250.82	0.089878	3.10965	0.619685	7.71263	0.009913
P00002	131	139	KRTVAAPSV			7	928.557	S2_3A3Fab_complex	0	929.045	0.030051	0	0	5.66349	0.032143
P00002	131	139	KRTVAAPSV			7	928.557	S2_3A3Fab_complex	0.167	929.43	0.170081	0.384357	0.172716	5.75876	0.002214
P00002	131	139	KRTVAAPSV			7	928.557	S2_3A3Fab_complex	1.667	929.739	0.335134	0.693605	0.336479	5.75915	0.001553
P00002	131	139	KRTVAAPSV			7	928.557	S2_3A3Fab_complex	16.667	929.993	0.118161	0.947629	0.121923	5.71979	0.047993
P00002	131	139	KRTVAAPSV			7	928.557	S2_3A3Fab_complex	166.667	929.674	0.136969	0.629231	0.140227	5.75313	0.001114
P00002	131	139	KRTVAAPSV			7	928.557	S2_Alone	0	929.045	0.030051	0	0	5.66349	0.032143
P00002	131	139	KRTVAAPSV			7	928.557	S2_Alone	0.167	929.144	0.106144	0.099155	0.110316	5.72901	0.045661
P00002	131	139	KRTVAAPSV			7	928.557	S2_Alone	1.667	929.384	0	0.33843	0.030051	5.62302	0
P00002	131	139	KRTVAAPSV			7	928.557	S2_Alone	16.667	929.549	0.124514	0.503435	0.128089	5.74746	0.002578
P00002	131	139	KRTVAAPSV			7	928.557	S2_Alone	166.667	929.607	0.117203	0.56125	0.120994	5.63735	0.001572
P00002	131	139	KRTVAAPSV			7	928.557	S2_FL_complex	0	929.045	0.030051	0	0	5.66349	0.032143
P00002	131	139	KRTVAAPSV			7	928.557	S2_FL_complex	0.167	932.203	0.842756	3.15768	0.843292	5.6768	0.037638
P00002	131	139	KRTVAAPSV			7	928.557	S2_FL_complex	1.667	932.448	1.14248	3.40255	1.14288	5.73591	0.009874
P00002	131	139	KRTVAAPSV			7	928.557	S2_FL_complex	16.667	932.559	0.851235	3.51355	0.851765	5.67961	0.039243
P00002	131	139	KRTVAAPSV			7	928.557	S2_FL_complex	166.667	932.659	0.854962	3.61353	0.85549	5.7028	0.03715
P00002	140	149	FIFPPSDEQL			7	1192.59	S2_3A3Fab_complex	0	1193.15	0.129117	0	0	7.98787	0.007988
P00002	140	149	FIFPPSDEQL			7	1192.59	S2_3A3Fab_complex	0.167	1195.53	4.01788	2.38686	4.01996	8.01435	0.026353
P00002	140	149	FIFPPSDEQL			7	1192.59	S2_3A3Fab_complex	1.667	1199.49	0.247342	6.34413	0.279015	7.98314	0.012742
P00002	140	149	FIFPPSDEQL			7	1192.59	S2_3A3Fab_complex	16.667	1193.97	1.58761	0.821065	1.59285	7.98607	0.009173
P00002	140	149	FIFPPSDEQL			7	1192.59	S2_3A3Fab_complex	166.667	1193.68	2.17658	0.538141	2.1804	7.97953	0.009827
P00002	140	149	FIFPPSDEQL			7	1192.59	S2_Alone	0	1193.15	0.129117	0	0	7.98787	0.007988
P00002	140	149	FIFPPSDEQL			7	1192.59	S2_Alone	0.167	1198.39	0.578004	5.24933	0.592249	7.97011	0.018585
P00002	140	149	FIFPPSDEQL			7	1192.59	S2_Alone	1.667	1198.09	3.54039	4.94022	3.54275	7.97414	0.012225
P00002	140	149	FIFPPSDEQL			7	1192.59	S2_Alone	16.667	1195.05	3.1734	1.90693	3.17602	8.00934	0.018041
P00002	140	149	FIFPPSDEQL			7	1192.59	S2_Alone	166.667	1201.28	0.048696	8.13895	0.137995	7.95064	0.014305
P00002	140	149	FIFPPSDEQL			7	1192.59	S2_FL_complex	0	1193.15	0.129117	0	0	7.98787	0.007988
P00002	140	149	FIFPPSDEQL			7	1192.59	S2_FL_complex	0.167	1194.46	0.011208	1.3103	0.129603	7.98288	0.013925
P00002	140	149	FIFPPSDEQL			7	1192.59	S2_FL_complex	1.667	1195.45	0.029426	2.3001	0.132428	7.98566	0.013062
P00002	140	149	FIFPPSDEQL			7	1192.59	S2_FL_complex	16.667	1195.66	0.042582	2.51512	0.135958	7.98663	0.016708
P00002	140	149	FIFPPSDEQL			7	1192.59	S2_FL_complex	166.667	1195.77	0.022933	2.62431	0.131138	7.97364	0.010957
P00002	173	185	KVDNALQSGNSQE			12	1389.66	S2_3A3Fab_complex	0	1390.38	0.039902	0	0	5.77433	0.032399
P00002	173	185	KVDNALQSGNSQE			12	1389.66	S2_3A3Fab_complex	0.167	1390.58	0.024905	0.197641	0.047036	5.86969	0.002841
P00002	173	185	KVDNALQSGNSQE			12	1389.66	S2_3A3Fab_complex	1.667	1390.87	0.187021	0.489788	0.19123	5.86698	0.00458
P00002	173	185	KVDNALQSGNSQE			12	1389.66	S2_3A3Fab_complex	16.667	1391	0.181634	0.620239	0.185965	5.82775	0.05035
P00002	173	185	KVDNALQSGNSQE			12	1389.66	S2_3A3Fab_complex	166.667	1390.99	0.532415	0.61223	0.533908	5.8721	0.013997
P00002	173	185	KVDNALQSGNSQE			12	1389.66	S2_Alone	0	1390.38	0.039902	0	0	5.77433	0.032399
P00002	173	185	KVDNALQSGNSQE			12	1389.66	S2_Alone	0.167	1391.63	3.98208	1.25091	3.98228	5.8472	0.029186
P00002	173	185	KVDNALQSGNSQE			12	1389.66	S2_Alone	1.667	1390.89	0.08368	0.5148	0.092707	5.89334	0.020773
P00002	173	185	KVDNALQSGNSQE			12	1389.66	S2_Alone	16.667	1390.69	0.084868	0.312692	0.09378	5.87102	0.020877
P00002	173	185	KVDNALQSGNSQE			12	1389.66	S2_Alone	166.667	1390.73	0.109192	0.350387	0.116254	5.76837	0.052725
P00002	173	185	KVDNALQSGNSQE			12	1389.66	S2_FL_complex	0	1390.38	0.039902	0	0	5.77433	0.032399
P00002	173	185	KVDNALQSGNSQE			12	1389.66	S2_FL_complex	0.167	1394.42	0.617295	4.03951	0.618583	5.83209	0.058801
P00002	173	185	KVDNALQSGNSQE			12	1389.66	S2_FL_complex	1.667	1395.34	0.63618	4.95638	0.637431	5.86834	0.016621
P00002	173	185	KVDNALQSGNSQE			12	1389.66	S2_FL_complex	16.667	1395.16	0.920334	4.77752	0.921199	5.8265	0.067762
P00002	173	185	KVDNALQSGNSQE			12	1389.66	S2_FL_complex	166.667	1395.21	0.143032	4.83434	0.148493	5.83107	0.038419
P00002	186	196	SVTEQDSKDST			10	1196.53	S2_3A3Fab_complex	0	1197.26	0.073081	0	0	5.18351	0.034969
P00002	186	196	SVTEQDSKDST			10	1196.53	S2_3A3Fab_complex	1.667	1198.79	0	1.53084	0.073081	5.27344	0
P00002	186	196	SVTEQDSKDST			10	1196.53	S2_3A3Fab_complex	16.667	1197.73	0.70179	0.466314	0.705585	5.15786	0.016492
P00002	186	196	SVTEQDSKDST			10	1196.53	S2_Alone	0	1197.26	0.073081	0	0	5.18351	0.034969
P00002	186	196	SVTEQDSKDST			10	1196.53	S2_Alone	0.167	1197.19	0.029732	-0.075359	0.078898	5.24116	0.04902
P00002	186	196	SVTEQDSKDST			10	1196.53	S2_Alone	1.667	1197.22	0	-0.039079	0.073081	5.14353	0
P00002	186	196	SVTEQDSKDST			10	1196.53	S2_Alone	16.667	1197.58	0.576164	0.315584	0.58078	5.27285	0.00095
P00002	186	196	SVTEQDSKDST			10	1196.53	S2_Alone	166.667	1197.53	0.128357	0.271137	0.147704	5.14851	0.003997
P00002	186	196	SVTEQDSKDST			10	1196.53	S2_FL_complex	0	1197.26	0.073081	0	0	5.18351	0.034969
P00002	186	196	SVTEQDSKDST			10	1196.53	S2_FL_complex	0.167	1202.39	0.31165	5.13033	0.320104	5.18579	0.060201
P00002	186	196	SVTEQDSKDST			10	1196.53	S2_FL_complex	1.667	1202.47	0.855231	5.20866	0.858348	5.25576	0.010946
P00002	186	196	SVTEQDSKDST			10	1196.53	S2_FL_complex	16.667	1202.02	1.76648	4.75431	1.76799	5.19446	0.068267
P00002	186	196	SVTEQDSKDST			10	1196.53	S2_FL_complex	166.667	1201.98	1.18009	4.71391	1.18235	5.21358	0.049144
P00002	220	230	VTHQGLSSPVT			9	1125.59	S2_3A3Fab_complex	0	1126.37	0.2855	0	0	6.12764	0.028832
P00002	220	230	VTHQGLSSPVT			9	1125.59	S2_3A3Fab_complex	0.167	1126.26	0.638866	-0.104587	0.699757	6.20799	0.005275
P00002	220	230	VTHQGLSSPVT			9	1125.59	S2_3A3Fab_complex	1.667	1126.38	0.725136	0.01484	0.779316	6.20417	0.00642
P00002	220	230	VTHQGLSSPVT			9	1125.59	S2_3A3Fab_complex	16.667	1126.27	0.027383	-0.096332	0.28681	6.17004	0.046729
P00002	220	230	VTHQGLSSPVT			9	1125.59	S2_3A3Fab_complex	166.667	1126.51	1.35808	0.142637	1.38776	6.19404	0.002213
P00002	220	230	VTHQGLSSPVT			9	1125.59	S2_Alone	0	1126.37	0.2855	0	0	6.12764	0.028832
P00002	220	230	VTHQGLSSPVT			9	1125.59	S2_Alone	0.167	1126.7	1.02623	0.3315	1.0652	6.19565	0.023951
P00002	220	230	VTHQGLSSPVT			9	1125.59	S2_Alone	1.667	1129.57	0	3.20168	0.2855	6.15718	0
P00002	220	230	VTHQGLSSPVT			9	1125.59	S2_Alone	16.667	1126.33	0.035262	-0.04013	0.287669	6.19687	0.003504
P00002	220	230	VTHQGLSSPVT			9	1125.59	S2_Alone	166.667	1126.58	1.92939	0.21386	1.9504	6.1089	0.007838
P00002	220	230	VTHQGLSSPVT			9	1125.59	S2_FL_complex	0	1126.37	0.2855	0	0	6.12764	0.028832
P00002	220	230	VTHQGLSSPVT			9	1125.59	S2_FL_complex	0.167	1127.83	0.469123	1.45814	0.549169	6.16627	0.050339
P00002	220	230	VTHQGLSSPVT			9	1125.59	S2_FL_complex	1.667	1128.11	0.233715	1.74273	0.368962	6.20224	0.011549
P00002	220	230	VTHQGLSSPVT			9	1125.59	S2_FL_complex	16.667	1128.69	0.517325	2.32622	0.590877	6.1605	0.05364
P00002	220	230	VTHQGLSSPVT			9	1125.59	S2_FL_complex	166.667	1128.64	0.259168	2.2766	0.385588	6.17493	0.03796
P00002	220	232	VTHQGLSSPVTKS			11	1340.72	S2_3A3Fab_complex	0	1341.35	0.01079	0	0	5.67316	0.032553
P00002	220	232	VTHQGLSSPVTKS			11	1340.72	S2_3A3Fab_complex	0.167	1341.36	0.008987	0.007395	0.014042	5.76271	0.002744
P00002	220	232	VTHQGLSSPVTKS			11	1340.72	S2_3A3Fab_complex	16.667	1341.45	0.074623	0.096724	0.075399	5.72373	0.055753
P00002	220	232	VTHQGLSSPVTKS			11	1340.72	S2_Alone	0	1341.35	0.01079	0	0	5.67316	0.032553
P00002	220	232	VTHQGLSSPVTKS			11	1340.72	S2_Alone	16.667	1341.5	0.022348	0.143044	0.024817	5.75677	0.001059
P00002	220	232	VTHQGLSSPVTKS			11	1340.72	S2_Alone	166.667	1341.5	0.085877	0.147455	0.086552	5.64372	0.006333
P00002	220	232	VTHQGLSSPVTKS			11	1340.72	S2_FL_complex	0	1341.35	0.01079	0	0	5.67316	0.032553
P00002	220	232	VTHQGLSSPVTKS			11	1340.72	S2_FL_complex	0.167	1343.07	0.50753	1.71525	0.507645	5.69092	0.056488
P00002	220	232	VTHQGLSSPVTKS			11	1340.72	S2_FL_complex	1.667	1343.49	0.203443	2.13641	0.203729	5.74657	0.012527
P00002	220	232	VTHQGLSSPVTKS			11	1340.72	S2_FL_complex	16.667	1343.98	0.391114	2.62794	0.391263	5.69854	0.065991
P00002	220	232	VTHQGLSSPVTKS			11	1340.72	S2_FL_complex	166.667	1344.26	0.315701	2.90745	0.315885	5.71299	0.045701
P00791	53	64	FPEAAALIGDEP			9	1229.6	S2_3A3Fab_complex	0	1230.47	0.241571	0	0	7.16801	0.033395
P00791	53	64	FPEAAALIGDEP			9	1229.6	S2_3A3Fab_complex	0.167	1234.69	0.055155	4.21686	0.247787	7.21282	0.001907
P00791	53	64	FPEAAALIGDEP			9	1229.6	S2_3A3Fab_complex	1.667	1234.85	0.052991	4.3728	0.247314	7.21041	0.008515
P00791	53	64	FPEAAALIGDEP			9	1229.6	S2_3A3Fab_complex	16.667	1235.3	0.07887	4.82282	0.25412	7.18152	0.035125
P00791	53	64	FPEAAALIGDEP			9	1229.6	S2_3A3Fab_complex	166.667	1235.34	0.101962	4.86613	0.262207	7.20972	0.01134
P00791	53	64	FPEAAALIGDEP			9	1229.6	S2_Alone	0	1230.5	0.282607	0	0	7.16869	0.033502
P00791	53	64	FPEAAALIGDEP			9	1229.6	S2_Alone	0.167	1234.7	0.131608	4.20934	0.311748	7.18226	0.030725
P00791	53	64	FPEAAALIGDEP			9	1229.6	S2_Alone	1.667	1234.82	0.07775	4.3271	0.293107	7.1937	0.040937
P00791	53	64	FPEAAALIGDEP			9	1229.6	S2_Alone	16.667	1235.25	0.086642	4.75407	0.29559	7.21235	0.009153
P00791	53	64	FPEAAALIGDEP			9	1229.6	S2_Alone	166.667	1235.54	0.157506	5.04636	0.323535	7.17014	0.038545
P00791	53	64	FPEAAALIGDEP			9	1229.6	S2_FL_complex	0	1230.5	0.282607	0	0	7.16869	0.033502
P00791	53	64	FPEAAALIGDEP			9	1229.6	S2_FL_complex	0.167	1234.64	0.068036	4.14109	0.290681	7.19349	0.034892
P00791	53	64	FPEAAALIGDEP			9	1229.6	S2_FL_complex	1.667	1234.79	0.145174	4.29901	0.317714	7.2052	0.014076
P00791	53	64	FPEAAALIGDEP			9	1229.6	S2_FL_complex	16.667	1235.2	0.064043	4.70809	0.289772	7.18954	0.039764
P00791	53	64	FPEAAALIGDEP			9	1229.6	S2_FL_complex	166.667	1235.1	0.06503	4.60241	0.289992	7.18554	0.002175
P00791	74	86	FGTIGIGTPAQDF			11	1323.66	S2_3A3Fab_complex	0	1324.33	0.045716	0	0	7.95408	0.010473
P00791	74	86	FGTIGIGTPAQDF			11	1323.66	S2_3A3Fab_complex	0.167	1324.26	0.114836	-0.071881	0.123601	7.9822	0.009657
P00791	74	86	FGTIGIGTPAQDF			11	1323.66	S2_3A3Fab_complex	1.667	1329.5	2.4751	5.17165	2.47552	7.9796	0.019307
P00791	74	86	FGTIGIGTPAQDF			11	1323.66	S2_3A3Fab_complex	16.667	1324.68	0.161618	0.344934	0.16796	7.96082	0.011755
P00791	74	86	FGTIGIGTPAQDF			11	1323.66	S2_3A3Fab_complex	166.667	1324.62	0.206962	0.287521	0.211951	7.97057	0.009701
P00791	74	86	FGTIGIGTPAQDF			11	1323.66	S2_Alone	0	1324.33	0.045716	0	0	7.95408	0.010473
P00791	74	86	FGTIGIGTPAQDF			11	1323.66	S2_Alone	0.167	1324.64	0.085091	0.311408	0.096594	7.95879	0.01484
P00791	74	86	FGTIGIGTPAQDF			11	1323.66	S2_Alone	1.667	1325.63	1.38798	1.29634	1.38873	7.97597	0.017281
P00791	74	86	FGTIGIGTPAQDF			11	1323.66	S2_Alone	16.667	1324.36	0.149286	0.028689	0.156129	7.97563	0.015019
P00791	74	86	FGTIGIGTPAQDF			11	1323.66	S2_Alone	166.667	1324.44	0.067582	0.105863	0.081593	7.96475	0.022984
P00791	74	86	FGTIGIGTPAQDF			11	1323.66	S2_FL_complex	0	1324.33	0.045716	0	0	7.95408	0.010473
P00791	74	86	FGTIGIGTPAQDF			11	1323.66	S2_FL_complex	0.167	1325.8	1.40583	1.4686	1.40657	7.99049	0.032014
P00791	74	86	FGTIGIGTPAQDF			11	1323.66	S2_FL_complex	1.667	1326.33	1.05459	1.99629	1.05558	7.98406	0.023073
P00791	74	86	FGTIGIGTPAQDF			11	1323.66	S2_FL_complex	16.667	1325.38	1.32279	1.04615	1.32358	7.98183	0.023547
P00791	74	86	FGTIGIGTPAQDF			11	1323.66	S2_FL_complex	166.667	1325.82	0.879097	1.48835	0.880284	7.9606	0.008641
P00791	91	97	DTGSSNL			6	693.305	S2_3A3Fab_complex	0	693.656	0.028112	0	0	6.168	0.016293
P00791	91	97	DTGSSNL			6	693.305	S2_3A3Fab_complex	0.167	699.57	2.06738	5.91367	2.06757	6.17235	0.038313
P00791	91	97	DTGSSNL			6	693.305	S2_3A3Fab_complex	1.667	698.556	0.441711	4.90025	0.442604	6.15672	0.039856
P00791	91	97	DTGSSNL			6	693.305	S2_3A3Fab_complex	16.667	694.663	1.68099	1.00684	1.68122	6.17165	0.013298
P00791	91	97	DTGSSNL			6	693.305	S2_3A3Fab_complex	166.667	696.989	2.69911	3.33272	2.69926	6.18865	0.079771
P00791	91	97	DTGSSNL			6	693.305	S2_Alone	0	693.656	0.028112	0	0	6.168	0.016293
P00791	91	97	DTGSSNL			6	693.305	S2_Alone	0.167	693.864	0.870458	0.207892	0.870912	6.21363	0.044658
P00791	91	97	DTGSSNL			6	693.305	S2_Alone	1.667	694.448	1.69549	0.792142	1.69572	6.16115	0.010192
P00791	91	97	DTGSSNL			6	693.305	S2_Alone	16.667	695.071	2.8566	1.41481	2.85673	6.23356	0.05216
P00791	91	97	DTGSSNL			6	693.305	S2_Alone	166.667	694.032	1.33822	0.376603	1.33852	6.16797	0.007717
P00791	91	97	DTGSSNL			6	693.305	S2_FL_complex	0	693.656	0.028112	0	0	6.168	0.016293
P00791	91	97	DTGSSNL			6	693.305	S2_FL_complex	0.167	694.553	1.41608	0.896928	1.41636	6.17673	0.020253
P00791	91	97	DTGSSNL			6	693.305	S2_FL_complex	1.667	700.145	0.455494	6.48921	0.45636	6.08805	0.020989
P00791	91	97	DTGSSNL			6	693.305	S2_FL_complex	16.667	698.877	2.56779	5.22111	2.56795	6.11786	0.022716
P00791	91	97	DTGSSNL			6	693.305	S2_FL_complex	166.667	693.888	0.797547	0.232558	0.798042	6.21565	0.037421
P00791	108	119	ACSDHNQFNPDD			10	1362.5	S2_3A3Fab_complex	0	1363.18	0.087538	0	0	6.16747	0.007855
P00791	108	119	ACSDHNQFNPDD			10	1362.5	S2_3A3Fab_complex	0.167	1369.33	1.49959	6.15002	1.50214	6.17204	0.019131
P00791	108	119	ACSDHNQFNPDD			10	1362.5	S2_3A3Fab_complex	1.667	1364.8	0	1.61606	0.087538	6.21208	0
P00791	108	119	ACSDHNQFNPDD			10	1362.5	S2_3A3Fab_complex	16.667	1368.97	1.31444	5.78575	1.31735	6.19394	0.040356
P00791	108	119	ACSDHNQFNPDD			10	1362.5	S2_3A3Fab_complex	166.667	1364.39	2.20676	1.20784	2.2085	6.13479	0.030486
P00791	108	119	ACSDHNQFNPDD			10	1362.5	S2_Alone	0	1363.18	0.087538	0	0	6.16747	0.007855
P00791	108	119	ACSDHNQFNPDD			10	1362.5	S2_Alone	0.167	1363.43	2.27374e-13	0.250174	0.087538	6.18071	0
P00791	108	119	ACSDHNQFNPDD			10	1362.5	S2_Alone	1.667	1363.16	0.367662	-0.018985	0.37794	6.15838	0.026969
P00791	108	119	ACSDHNQFNPDD			10	1362.5	S2_Alone	16.667	1371.76	3.98654	8.58289	3.9875	6.17223	0.043482
P00791	108	119	ACSDHNQFNPDD			10	1362.5	S2_Alone	166.667	1363.67	0.064488	0.491206	0.108727	6.16781	0.017872
P00791	108	119	ACSDHNQFNPDD			10	1362.5	S2_FL_complex	0	1363.18	0.087538	0	0	6.16747	0.007855
P00791	108	119	ACSDHNQFNPDD			10	1362.5	S2_FL_complex	0.167	1365.49	3.09444	2.30536	3.09567	6.18295	0.039917
P00791	108	119	ACSDHNQFNPDD			10	1362.5	S2_FL_complex	1.667	1363.48	0.421371	0.293125	0.430368	6.21675	0.017684
P00791	108	119	ACSDHNQFNPDD			10	1362.5	S2_FL_complex	16.667	1366.09	1.70101	2.90974	1.70326	6.18709	0.040082
P00791	108	119	ACSDHNQFNPDD			10	1362.5	S2_FL_complex	166.667	1367.36	3.50438	4.17731	3.50547	6.17263	0.067676
P00791	108	122	ACSDHNQFNPDDSST			13	1637.61	S2_3A3Fab_complex	0	1638.5	0.03837	0	0	6.18133	0.039046
P00791	108	122	ACSDHNQFNPDDSST			13	1637.61	S2_3A3Fab_complex	0.167	1638.74	0.13887	0.243447	0.144074	6.27571	0.001735
P00791	108	122	ACSDHNQFNPDDSST			13	1637.61	S2_3A3Fab_complex	1.667	1638.77	0.225955	0.275143	0.22919	6.27628	0.007862
P00791	108	122	ACSDHNQFNPDDSST			13	1637.61	S2_3A3Fab_complex	16.667	1638.86	0.795886	0.367067	0.79681	6.21716	0.055212
P00791	108	122	ACSDHNQFNPDDSST			13	1637.61	S2_3A3Fab_complex	166.667	1638.9	1.79146	0.402687	1.79187	6.26997	0.019247
P00791	108	122	ACSDHNQFNPDDSST			13	1637.61	S2_Alone	0	1638.5	0.03837	0	0	6.18133	0.039046
P00791	108	122	ACSDHNQFNPDDSST			13	1637.61	S2_Alone	0.167	1638.69	0.027671	0.189711	0.047307	6.22318	0.042099
P00791	108	122	ACSDHNQFNPDDSST			13	1637.61	S2_Alone	1.667	1638.72	0.373044	0.218973	0.375012	6.21176	0.059781
P00791	108	122	ACSDHNQFNPDDSST			13	1637.61	S2_Alone	16.667	1638.75	0.406475	0.250974	0.408282	6.2602	0.011361
P00791	108	122	ACSDHNQFNPDDSST			13	1637.61	S2_Alone	166.667	1638.81	0.791128	0.315807	0.792058	6.19811	0.047656
P00791	108	122	ACSDHNQFNPDDSST			13	1637.61	S2_FL_complex	0	1638.5	0.03837	0	0	6.18133	0.039046
P00791	108	122	ACSDHNQFNPDDSST			13	1637.61	S2_FL_complex	0.167	1638.83	0.881287	0.335912	0.882121	6.20684	0.058502
P00791	108	122	ACSDHNQFNPDDSST			13	1637.61	S2_FL_complex	1.667	1638.64	0.041617	0.139596	0.056606	6.26318	0.019618
P00791	108	122	ACSDHNQFNPDDSST			13	1637.61	S2_FL_complex	16.667	1638.69	0.568643	0.196794	0.569936	6.22938	0.058885
P00791	108	122	ACSDHNQFNPDDSST			13	1637.61	S2_FL_complex	166.667	1638.9	1.40345	0.401906	1.40398	6.20464	0.037629
P00791	131	146	SITYGTGSMTGILGYD			15	1635.76	S2_3A3Fab_complex	0	1636.6	0.072496	0	0	8.02032	0.019133
P00791	131	146	SITYGTGSMTGILGYD			15	1635.76	S2_3A3Fab_complex	0.167	1636.81	0.045154	0.202533	0.085408	8.06925	0.003754
P00791	131	146	SITYGTGSMTGILGYD			15	1635.76	S2_3A3Fab_complex	1.667	1636.97	0.101777	0.363475	0.124957	8.05488	0.012682
P00791	131	146	SITYGTGSMTGILGYD			15	1635.76	S2_3A3Fab_complex	16.667	1636.8	0.026577	0.200325	0.077214	8.04212	0.017261
P00791	131	146	SITYGTGSMTGILGYD			15	1635.76	S2_3A3Fab_complex	166.667	1636.98	0.079564	0.373674	0.107639	8.056	0.013578
P00791	131	146	SITYGTGSMTGILGYD			15	1635.76	S2_Alone	0	1636.6	0.072496	0	0	8.02032	0.019133
P00791	131	146	SITYGTGSMTGILGYD			15	1635.76	S2_Alone	0.167	1636.88	0.056409	0.274347	0.091856	8.03242	0.021305
P00791	131	146	SITYGTGSMTGILGYD			15	1635.76	S2_Alone	1.667	1636.95	0.129061	0.342224	0.148029	8.04063	0.022163
P00791	131	146	SITYGTGSMTGILGYD			15	1635.76	S2_Alone	16.667	1636.87	0.074941	0.263447	0.104268	8.06853	0.004757
P00791	131	146	SITYGTGSMTGILGYD			15	1635.76	S2_Alone	166.667	1636.79	0.111205	0.184925	0.132749	8.04467	0.021648
P00791	131	146	SITYGTGSMTGILGYD			15	1635.76	S2_FL_complex	0	1636.6	0.072496	0	0	8.02032	0.019133
P00791	131	146	SITYGTGSMTGILGYD			15	1635.76	S2_FL_complex	0.167	1636.92	0.167902	0.312102	0.182884	8.04519	0.024107
P00791	131	146	SITYGTGSMTGILGYD			15	1635.76	S2_FL_complex	1.667	1637.02	0.309518	0.415876	0.317895	8.03487	0.025794
P00791	131	146	SITYGTGSMTGILGYD			15	1635.76	S2_FL_complex	16.667	1636.81	0.073602	0.209624	0.10331	8.05355	0.016988
P00791	131	146	SITYGTGSMTGILGYD			15	1635.76	S2_FL_complex	166.667	1637.04	0.098461	0.435513	0.122271	8.03398	0.015752
P00791	131	149	SITYGTGSMTGILGYDTVQ			18	1963.93	S2_3A3Fab_complex	0	1965.07	0.065963	0	0	7.93668	0.0139
P00791	131	149	SITYGTGSMTGILGYDTVQ			18	1963.93	S2_3A3Fab_complex	0.167	1968.04	2.41242	2.97111	2.41333	7.9113	0.027574
P00791	131	149	SITYGTGSMTGILGYDTVQ			18	1963.93	S2_3A3Fab_complex	1.667	1985.82	4.53594	20.7525	4.53642	7.85374	0.013615
P00791	131	149	SITYGTGSMTGILGYDTVQ			18	1963.93	S2_3A3Fab_complex	16.667	1969.99	4.46107	4.92397	4.46156	7.9303	0.003041
P00791	131	149	SITYGTGSMTGILGYDTVQ			18	1963.93	S2_3A3Fab_complex	166.667	1967.18	0.342168	2.11368	0.348468	7.91449	0.010174
P00791	131	149	SITYGTGSMTGILGYDTVQ			18	1963.93	S2_Alone	0	1965.05	0.112592	0	0	7.93612	0.013159
P00791	131	149	SITYGTGSMTGILGYDTVQ			18	1963.93	S2_Alone	0.167	1965.73	0.364069	0.671014	0.381082	7.94197	0.016474
P00791	131	149	SITYGTGSMTGILGYDTVQ			18	1963.93	S2_Alone	1.667	1965.56	0.120348	0.503775	0.164805	7.94608	0.020921
P00791	131	149	SITYGTGSMTGILGYDTVQ			18	1963.93	S2_Alone	16.667	1965.56	0.558659	0.502538	0.569892	7.96802	0.007319
P00791	131	149	SITYGTGSMTGILGYDTVQ			18	1963.93	S2_Alone	166.667	1965.6	0.558751	0.54622	0.569983	7.95531	0.025319
P00791	131	149	SITYGTGSMTGILGYDTVQ			18	1963.93	S2_FL_complex	0	1965.05	0.112592	0	0	7.93612	0.013159
P00791	131	149	SITYGTGSMTGILGYDTVQ			18	1963.93	S2_FL_complex	0.167	1965.88	0.18283	0.822851	0.214718	7.94631	0.00596
P00791	131	149	SITYGTGSMTGILGYDTVQ			18	1963.93	S2_FL_complex	1.667	1965.25	0.391316	0.193309	0.407192	7.95079	0.012755
P00791	131	149	SITYGTGSMTGILGYDTVQ			18	1963.93	S2_FL_complex	16.667	1965.81	0.86839	0.757754	0.875659	7.96227	0.010884
P00791	131	149	SITYGTGSMTGILGYDTVQ			18	1963.93	S2_FL_complex	166.667	1966.11	0.634006	1.05436	0.643926	7.94404	0.014408
P00791	146	163	DTVQVGGISDTNQIFGLS			17	1850.91	S2_3A3Fab_complex	0	1851.84	0.072352	0	0	7.98161	0.013577
P00791	146	163	DTVQVGGISDTNQIFGLS			17	1850.91	S2_3A3Fab_complex	0.167	1852.15	0.086049	0.309155	0.112425	8.01826	0.001753
P00791	146	163	DTVQVGGISDTNQIFGLS			17	1850.91	S2_3A3Fab_complex	1.667	1852.13	0.116813	0.29491	0.137405	8.0208	0.000393
P00791	146	163	DTVQVGGISDTNQIFGLS			17	1850.91	S2_3A3Fab_complex	16.667	1852.34	0	0.508264	0.072352	7.99974	0
P00791	146	163	DTVQVGGISDTNQIFGLS			17	1850.91	S2_3A3Fab_complex	166.667	1852.28	0.095611	0.442035	0.119901	7.99708	0.006849
P00791	146	163	DTVQVGGISDTNQIFGLS			17	1850.91	S2_Alone	0	1851.84	0.072352	0	0	7.98161	0.013577
P00791	146	163	DTVQVGGISDTNQIFGLS			17	1850.91	S2_Alone	0.167	1852.32	0.074985	0.481715	0.1042	7.98608	0.008118
P00791	146	163	DTVQVGGISDTNQIFGLS			17	1850.91	S2_Alone	1.667	1852.29	0.178719	0.450338	0.192809	7.99704	0.021506
P00791	146	163	DTVQVGGISDTNQIFGLS			17	1850.91	S2_Alone	16.667	1852.28	0.021519	0.448494	0.075485	8.01339	0.010653
P00791	146	163	DTVQVGGISDTNQIFGLS			17	1850.91	S2_Alone	166.667	1852.25	0.102591	0.418863	0.125538	7.99415	0.022909
P00791	146	163	DTVQVGGISDTNQIFGLS			17	1850.91	S2_FL_complex	0	1851.84	0.072352	0	0	7.98161	0.013577
P00791	146	163	DTVQVGGISDTNQIFGLS			17	1850.91	S2_FL_complex	0.167	1852.37	0.19825	0.537625	0.211041	8.00599	0.006691
P00791	146	163	DTVQVGGISDTNQIFGLS			17	1850.91	S2_FL_complex	1.667	1852.19	0	0.350476	0.072352	7.96206	0
P00791	146	163	DTVQVGGISDTNQIFGLS			17	1850.91	S2_FL_complex	16.667	1851.98	0.103184	0.144566	0.126023	7.98871	0.000387
P00791	146	163	DTVQVGGISDTNQIFGLS			17	1850.91	S2_FL_complex	166.667	1852.19	0.153224	0.350296	0.169447	7.98309	0.004621
P00791	147	162	TVQVGGISDTNQIFGL			15	1648.85	S2_3A3Fab_complex	0	1649.7	0.056193	0	0	8.20033	0.011784
P00791	147	162	TVQVGGISDTNQIFGL			15	1648.85	S2_3A3Fab_complex	0.167	1650.07	0.583508	0.371163	0.586208	8.21457	0.005013
P00791	147	162	TVQVGGISDTNQIFGL			15	1648.85	S2_3A3Fab_complex	1.667	1649.85	2.27374e-13	0.155174	0.056193	8.21161	0
P00791	147	162	TVQVGGISDTNQIFGL			15	1648.85	S2_3A3Fab_complex	16.667	1649.98	0.095188	0.285274	0.110537	8.20345	0.009773
P00791	147	162	TVQVGGISDTNQIFGL			15	1648.85	S2_3A3Fab_complex	166.667	1650.04	0.049264	0.337771	0.074731	8.20233	0.009176
P00791	147	162	TVQVGGISDTNQIFGL			15	1648.85	S2_Alone	0	1649.7	0.056193	0	0	8.20033	0.011784
P00791	147	162	TVQVGGISDTNQIFGL			15	1648.85	S2_Alone	0.167	1650.05	0.072764	0.356537	0.091936	8.19829	0.017632
P00791	147	162	TVQVGGISDTNQIFGL			15	1648.85	S2_Alone	1.667	1649.97	0.055235	0.271963	0.078795	8.20585	0.011035
P00791	147	162	TVQVGGISDTNQIFGL			15	1648.85	S2_Alone	16.667	1650	0.049289	0.303119	0.074747	8.21389	0.004913
P00791	147	162	TVQVGGISDTNQIFGL			15	1648.85	S2_Alone	166.667	1650.03	0.070545	0.333784	0.09019	8.20555	0.014673
P00791	147	162	TVQVGGISDTNQIFGL			15	1648.85	S2_FL_complex	0	1649.7	0.056193	0	0	8.20033	0.011784
P00791	147	162	TVQVGGISDTNQIFGL			15	1648.85	S2_FL_complex	0.167	1649.92	0.009334	0.226629	0.056963	8.21403	0.012595
P00791	147	162	TVQVGGISDTNQIFGL			15	1648.85	S2_FL_complex	1.667	1649.97	0.019299	0.275824	0.059415	8.21423	0.004114
P00791	147	162	TVQVGGISDTNQIFGL			15	1648.85	S2_FL_complex	16.667	1649.93	0.086225	0.230299	0.10292	8.21135	0.007617
P00791	147	162	TVQVGGISDTNQIFGL			15	1648.85	S2_FL_complex	166.667	1649.99	0.05105	0.292063	0.075919	8.19254	0.008243
P00791	147	163	TVQVGGISDTNQIFGLS			16	1735.89	S2_3A3Fab_complex	0	1736.79	0.01708	0	0	7.91289	0.014882
P00791	147	163	TVQVGGISDTNQIFGLS			16	1735.89	S2_3A3Fab_complex	0.167	1736.77	0.02834	-0.015323	0.033089	7.90081	0.00658
P00791	147	163	TVQVGGISDTNQIFGLS			16	1735.89	S2_3A3Fab_complex	1.667	1737.01	0.269452	0.219312	0.269993	7.906	0.018761
P00791	147	163	TVQVGGISDTNQIFGLS			16	1735.89	S2_3A3Fab_complex	16.667	1736.91	0.062373	0.128827	0.064669	7.88633	0.014784
P00791	147	163	TVQVGGISDTNQIFGLS			16	1735.89	S2_3A3Fab_complex	166.667	1736.91	0.064745	0.126707	0.06696	7.88731	0.010835
P00791	147	163	TVQVGGISDTNQIFGLS			16	1735.89	S2_Alone	0	1736.79	0.01708	0	0	7.91289	0.014882
P00791	147	163	TVQVGGISDTNQIFGLS			16	1735.89	S2_Alone	0.167	1737.13	0.080248	0.341324	0.082046	7.92442	0.016442
P00791	147	163	TVQVGGISDTNQIFGLS			16	1735.89	S2_Alone	1.667	1737.08	0.069409	0.290112	0.07148	7.92772	0.019033
P00791	147	163	TVQVGGISDTNQIFGLS			16	1735.89	S2_Alone	16.667	1737.14	0.029611	0.351191	0.034184	7.94192	0.006245
P00791	147	163	TVQVGGISDTNQIFGLS			16	1735.89	S2_Alone	166.667	1737.1	0.054419	0.316408	0.057036	7.92622	0.022054
P00791	147	163	TVQVGGISDTNQIFGLS			16	1735.89	S2_FL_complex	0	1736.79	0.01708	0	0	7.91289	0.014882
P00791	147	163	TVQVGGISDTNQIFGLS			16	1735.89	S2_FL_complex	0.167	1737.1	0.031026	0.315751	0.035416	7.91465	0.017273
P00791	147	163	TVQVGGISDTNQIFGLS			16	1735.89	S2_FL_complex	1.667	1737.09	0.10175	0.306397	0.103173	7.91469	0.014523
P00791	147	163	TVQVGGISDTNQIFGLS			16	1735.89	S2_FL_complex	16.667	1737.09	0.125813	0.308345	0.126967	7.92049	0.012301
P00791	147	163	TVQVGGISDTNQIFGLS			16	1735.89	S2_FL_complex	166.667	1737.17	0.051918	0.379319	0.054655	7.9006	0.005839
P00791	147	170	TVQVGGISDTNQIFGLSETEPGSF			22	2483.19	S2_3A3Fab_complex	0	2484.61	0.049164	0	0	8.11894	0.010356
P00791	147	170	TVQVGGISDTNQIFGLSETEPGSF			22	2483.19	S2_3A3Fab_complex	0.167	2484.76	0.133733	0.153641	0.142484	8.14596	0.005357
P00791	147	170	TVQVGGISDTNQIFGLSETEPGSF			22	2483.19	S2_3A3Fab_complex	1.667	2485.11	0.091548	0.505943	0.103914	8.13329	0.013353
P00791	147	170	TVQVGGISDTNQIFGLSETEPGSF			22	2483.19	S2_3A3Fab_complex	16.667	2485.14	0.176759	0.530532	0.183469	8.1219	0.012029
P00791	147	170	TVQVGGISDTNQIFGLSETEPGSF			22	2483.19	S2_3A3Fab_complex	166.667	2485.28	0.206635	0.677665	0.212404	8.12801	0.008519
P00791	147	170	TVQVGGISDTNQIFGLSETEPGSF			22	2483.19	S2_Alone	0	2484.61	0.049164	0	0	8.11894	0.010356
P00791	147	170	TVQVGGISDTNQIFGLSETEPGSF			22	2483.19	S2_Alone	0.167	2485.26	0.184171	0.650528	0.19062	8.11258	0.010824
P00791	147	170	TVQVGGISDTNQIFGLSETEPGSF			22	2483.19	S2_Alone	1.667	2485.07	0.200398	0.467574	0.20634	8.11777	0.014533
P00791	147	170	TVQVGGISDTNQIFGLSETEPGSF			22	2483.19	S2_Alone	16.667	2485.22	0.17587	0.617884	0.182612	8.13274	0.008985
P00791	147	170	TVQVGGISDTNQIFGLSETEPGSF			22	2483.19	S2_Alone	166.667	2485.13	0.115675	0.518825	0.12569	8.12681	0.019645
P00791	147	170	TVQVGGISDTNQIFGLSETEPGSF			22	2483.19	S2_FL_complex	0	2484.61	0.049164	0	0	8.11894	0.010356
P00791	147	170	TVQVGGISDTNQIFGLSETEPGSF			22	2483.19	S2_FL_complex	0.167	2485.29	0.284032	0.682377	0.288256	8.1347	0.014804
P00791	147	170	TVQVGGISDTNQIFGLSETEPGSF			22	2483.19	S2_FL_complex	1.667	2485.4	0.884838	0.792012	0.886203	8.11983	0.019094
P00791	147	170	TVQVGGISDTNQIFGLSETEPGSF			22	2483.19	S2_FL_complex	16.667	2485.07	0.136212	0.458541	0.144813	8.13202	0.014746
P00791	147	170	TVQVGGISDTNQIFGLSETEPGSF			22	2483.19	S2_FL_complex	166.667	2485.33	0.171111	0.72759	0.178034	8.11576	0.004298
P00791	150	162	VGGISDTNQIFGL			12	1320.68	S2_3A3Fab_complex	0	1321.33	0.034008	0	0	8.22412	0.01031
P00791	150	162	VGGISDTNQIFGL			12	1320.68	S2_3A3Fab_complex	0.167	1321.64	0.120434	0.308325	0.125144	8.24285	0.003876
P00791	150	162	VGGISDTNQIFGL			12	1320.68	S2_3A3Fab_complex	1.667	1321.61	0.085845	0.285492	0.092335	8.23305	0.012433
P00791	150	162	VGGISDTNQIFGL			12	1320.68	S2_3A3Fab_complex	16.667	1321.61	0.176752	0.281149	0.179994	8.22693	0.014264
P00791	150	162	VGGISDTNQIFGL			12	1320.68	S2_3A3Fab_complex	166.667	1321.65	0.086711	0.321073	0.093141	8.22681	0.01403
P00791	150	162	VGGISDTNQIFGL			12	1320.68	S2_Alone	0	1321.33	0.034008	0	0	8.22412	0.01031
P00791	150	162	VGGISDTNQIFGL			12	1320.68	S2_Alone	0.167	1321.59	0.087254	0.262537	0.093647	8.21973	0.014866
P00791	150	162	VGGISDTNQIFGL			12	1320.68	S2_Alone	1.667	1321.54	0.095587	0.208244	0.101456	8.22803	0.015698
P00791	150	162	VGGISDTNQIFGL			12	1320.68	S2_Alone	16.667	1321.52	0.099824	0.189509	0.105457	8.23682	0.006679
P00791	150	162	VGGISDTNQIFGL			12	1320.68	S2_Alone	166.667	1321.55	0.088397	0.218103	0.094713	8.23056	0.018817
P00791	150	162	VGGISDTNQIFGL			12	1320.68	S2_FL_complex	0	1321.33	0.034008	0	0	8.22412	0.01031
P00791	150	162	VGGISDTNQIFGL			12	1320.68	S2_FL_complex	0.167	1321.69	0.191078	0.361258	0.194081	8.22984	0.012242
P00791	150	162	VGGISDTNQIFGL			12	1320.68	S2_FL_complex	1.667	1321.61	0.104661	0.278381	0.110047	8.22858	0.015348
P00791	150	162	VGGISDTNQIFGL			12	1320.68	S2_FL_complex	16.667	1321.66	0.215324	0.328677	0.217993	8.23308	0.007643
P00791	150	162	VGGISDTNQIFGL			12	1320.68	S2_FL_complex	166.667	1322.28	1.96397	0.951077	1.96426	8.21181	0.008066
P00791	150	163	VGGISDTNQIFGLS			13	1407.71	S2_3A3Fab_complex	0	1408.39	0.04319	0	0	7.91464	0.012047
P00791	150	163	VGGISDTNQIFGLS			13	1407.71	S2_3A3Fab_complex	0.167	1408.41	0.007009	0.018031	0.043755	7.94246	0.002373
P00791	150	163	VGGISDTNQIFGLS			13	1407.71	S2_3A3Fab_complex	1.667	1408.5	0.073061	0.11276	0.084872	7.94066	0.01139
P00791	150	163	VGGISDTNQIFGLS			13	1407.71	S2_3A3Fab_complex	16.667	1408.53	0.062028	0.146165	0.075583	7.92965	0.011949
P00791	150	163	VGGISDTNQIFGLS			13	1407.71	S2_3A3Fab_complex	166.667	1408.6	0.080613	0.212739	0.091454	7.93968	0.011332
P00791	150	163	VGGISDTNQIFGLS			13	1407.71	S2_Alone	0	1408.39	0.04319	0	0	7.91464	0.012047
P00791	150	163	VGGISDTNQIFGLS			13	1407.71	S2_Alone	0.167	1408.58	0.06836	0.190803	0.080861	7.92264	0.013676
P00791	150	163	VGGISDTNQIFGLS			13	1407.71	S2_Alone	1.667	1408.55	0.02912	0.166059	0.05209	7.92486	0.016435
P00791	150	163	VGGISDTNQIFGLS			13	1407.71	S2_Alone	16.667	1408.58	0.085955	0.194693	0.096196	7.9366	0.006403
P00791	150	163	VGGISDTNQIFGLS			13	1407.71	S2_Alone	166.667	1408.6	0.091451	0.214536	0.101137	7.92212	0.018104
P00791	150	163	VGGISDTNQIFGLS			13	1407.71	S2_FL_complex	0	1408.39	0.04319	0	0	7.91464	0.012047
P00791	150	163	VGGISDTNQIFGLS			13	1407.71	S2_FL_complex	0.167	1408.49	0.042455	0.100996	0.060562	7.92459	0.020584
P00791	150	163	VGGISDTNQIFGLS			13	1407.71	S2_FL_complex	1.667	1408.5	0.044526	0.113172	0.062032	7.92978	0.015706
P00791	150	163	VGGISDTNQIFGLS			13	1407.71	S2_FL_complex	16.667	1408.55	0.054101	0.162877	0.069226	7.93254	0.02112
P00791	150	163	VGGISDTNQIFGLS			13	1407.71	S2_FL_complex	166.667	1408.63	0.103126	0.237626	0.111805	7.91898	0.010608
P00791	150	170	VGGISDTNQIFGLSETEPGSF			19	2155.02	S2_3A3Fab_complex	0	2156.19	0.026453	0	0	8.13915	0.010239
P00791	150	170	VGGISDTNQIFGLSETEPGSF			19	2155.02	S2_3A3Fab_complex	0.167	2156.28	0.152517	0.097416	0.154794	8.16442	0.008062
P00791	150	170	VGGISDTNQIFGLSETEPGSF			19	2155.02	S2_3A3Fab_complex	1.667	2156.61	0.127378	0.422738	0.130095	8.156	0.011549
P00791	150	170	VGGISDTNQIFGLSETEPGSF			19	2155.02	S2_3A3Fab_complex	16.667	2156.47	0.045919	0.280037	0.052994	8.14822	0.013815
P00791	150	170	VGGISDTNQIFGLSETEPGSF			19	2155.02	S2_3A3Fab_complex	166.667	2156.87	1.05477	0.683094	1.0551	8.13865	0.00764
P00791	150	170	VGGISDTNQIFGLSETEPGSF			19	2155.02	S2_Alone	0	2156.19	0.026453	0	0	8.13915	0.010239
P00791	150	170	VGGISDTNQIFGLSETEPGSF			19	2155.02	S2_Alone	0.167	2156.77	0.141883	0.580326	0.144327	8.13178	0.010708
P00791	150	170	VGGISDTNQIFGLSETEPGSF			19	2155.02	S2_Alone	1.667	2156.67	0.207841	0.486276	0.209517	8.14357	0.01403
P00791	150	170	VGGISDTNQIFGLSETEPGSF			19	2155.02	S2_Alone	16.667	2156.68	0.141764	0.494129	0.144211	8.15757	0.005382
P00791	150	170	VGGISDTNQIFGLSETEPGSF			19	2155.02	S2_Alone	166.667	2156.69	0.157564	0.498382	0.159769	8.15014	0.016745
P00791	150	170	VGGISDTNQIFGLSETEPGSF			19	2155.02	S2_FL_complex	0	2156.19	0.026453	0	0	8.13915	0.010239
P00791	150	170	VGGISDTNQIFGLSETEPGSF			19	2155.02	S2_FL_complex	0.167	2156.68	0.025857	0.49655	0.036991	8.15148	0.012939
P00791	150	170	VGGISDTNQIFGLSETEPGSF			19	2155.02	S2_FL_complex	1.667	2156.55	0.097112	0.366057	0.100651	8.14729	0.018347
P00791	150	170	VGGISDTNQIFGLSETEPGSF			19	2155.02	S2_FL_complex	16.667	2156.63	0.115268	0.438495	0.118264	8.153	0.012932
P00791	150	170	VGGISDTNQIFGLSETEPGSF			19	2155.02	S2_FL_complex	166.667	2156.85	0.060106	0.66282	0.06567	8.13245	0.005501
P00791	171	180	LYYAPFDGIL			8	1171.6	S2_3A3Fab_complex	0	1172.24	0.005544	0	0	8.77318	0.005686
P00791	171	180	LYYAPFDGIL			8	1171.6	S2_3A3Fab_complex	0.167	1172.34	0.003173	0.098029	0.006388	8.76852	0.004247
P00791	171	180	LYYAPFDGIL			8	1171.6	S2_3A3Fab_complex	1.667	1172.36	0.009629	0.118702	0.011111	8.74752	0.0225
P00791	171	180	LYYAPFDGIL			8	1171.6	S2_3A3Fab_complex	16.667	1172.37	0.027392	0.12704	0.027947	8.76431	0.008379
P00791	171	180	LYYAPFDGIL			8	1171.6	S2_3A3Fab_complex	166.667	1172.4	0.025504	0.161138	0.026099	8.73648	0.022712
P00791	171	180	LYYAPFDGIL			8	1171.6	S2_Alone	0	1172.24	0.005544	0	0	8.77318	0.005686
P00791	171	180	LYYAPFDGIL			8	1171.6	S2_Alone	0.167	1172.38	0.026589	0.137452	0.02716	8.74098	0.026696
P00791	171	180	LYYAPFDGIL			8	1171.6	S2_Alone	1.667	1172.37	0.024059	0.126033	0.02469	8.7626	0.018209
P00791	171	180	LYYAPFDGIL			8	1171.6	S2_Alone	16.667	1172.35	0.02627	0.114863	0.026849	8.75974	0.011298
P00791	171	180	LYYAPFDGIL			8	1171.6	S2_Alone	166.667	1172.38	0.03963	0.145383	0.040016	8.77649	0.006661
P00791	171	180	LYYAPFDGIL			8	1171.6	S2_FL_complex	0	1172.24	0.005544	0	0	8.77318	0.005686
P00791	171	180	LYYAPFDGIL			8	1171.6	S2_FL_complex	0.167	1172.37	0.012566	0.131441	0.013735	8.76764	0.013641
P00791	171	180	LYYAPFDGIL			8	1171.6	S2_FL_complex	1.667	1172.35	0.03321	0.111683	0.033669	8.74596	0.025234
P00791	171	180	LYYAPFDGIL			8	1171.6	S2_FL_complex	16.667	1172.37	0.03798	0.127764	0.038382	8.76746	0.009943
P00791	171	180	LYYAPFDGIL			8	1171.6	S2_FL_complex	166.667	1172.41	0.008457	0.166016	0.010112	8.7348	0.02188
P00791	171	181	LYYAPFDGILG			9	1228.62	S2_3A3Fab_complex	0	1229.31	0.010476	0	0	8.64542	0.005123
P00791	171	181	LYYAPFDGILG			9	1228.62	S2_3A3Fab_complex	0.167	1229.44	0.029822	0.135567	0.031609	8.64791	0.003154
P00791	171	181	LYYAPFDGILG			9	1228.62	S2_3A3Fab_complex	1.667	1229.48	0.047891	0.171463	0.049024	8.63361	0.018132
P00791	171	181	LYYAPFDGILG			9	1228.62	S2_3A3Fab_complex	16.667	1229.47	0.038326	0.166549	0.039732	8.63918	0.005478
P00791	171	181	LYYAPFDGILG			9	1228.62	S2_3A3Fab_complex	166.667	1229.47	0.032396	0.166135	0.034048	8.62252	0.017991
P00791	171	181	LYYAPFDGILG			9	1228.62	S2_Alone	0	1229.31	0.010476	0	0	8.64542	0.005123
P00791	171	181	LYYAPFDGILG			9	1228.62	S2_Alone	0.167	1229.49	0.041599	0.179779	0.042898	8.62585	0.020192
P00791	171	181	LYYAPFDGILG			9	1228.62	S2_Alone	1.667	1229.47	0.036762	0.165842	0.038225	8.63933	0.011295
P00791	171	181	LYYAPFDGILG			9	1228.62	S2_Alone	16.667	1229.48	0.021554	0.169474	0.023965	8.64117	0.008343
P00791	171	181	LYYAPFDGILG			9	1228.62	S2_Alone	166.667	1229.46	0.029912	0.156136	0.031693	8.64964	0.00849
P00791	171	181	LYYAPFDGILG			9	1228.62	S2_FL_complex	0	1229.31	0.010476	0	0	8.64542	0.005123
P00791	171	181	LYYAPFDGILG			9	1228.62	S2_FL_complex	0.167	1229.48	0.004818	0.177251	0.011531	8.64291	0.012812
P00791	171	181	LYYAPFDGILG			9	1228.62	S2_FL_complex	1.667	1229.44	0.0245	0.137176	0.026646	8.63298	0.017097
P00791	171	181	LYYAPFDGILG			9	1228.62	S2_FL_complex	16.667	1229.44	0.045585	0.138194	0.046773	8.64341	0.006601
P00791	171	181	LYYAPFDGILG			9	1228.62	S2_FL_complex	166.667	1229.5	0.015705	0.19704	0.018878	8.6204	0.015931
P00791	171	184	LYYAPFDGILGLAY			12	1575.81	S2_3A3Fab_complex	0	1576.66	0.025618	0	0	9.0906	0.010377
P00791	171	184	LYYAPFDGILGLAY			12	1575.81	S2_3A3Fab_complex	0.167	1576.79	0.266322	0.122981	0.267551	9.0627	0.005952
P00791	171	184	LYYAPFDGILGLAY			12	1575.81	S2_3A3Fab_complex	1.667	1576.74	0.061838	0.076999	0.066934	9.04988	0.001427
P00791	171	184	LYYAPFDGILGLAY			12	1575.81	S2_3A3Fab_complex	16.667	1576.96	0.083066	0.294866	0.086927	9.06959	0.022925
P00791	171	184	LYYAPFDGILGLAY			12	1575.81	S2_3A3Fab_complex	166.667	1576.66	0.164527	-0.001779	0.16651	9.05692	0.000962
P00791	171	184	LYYAPFDGILGLAY			12	1575.81	S2_Alone	0	1576.66	0.025618	0	0	9.0906	0.010377
P00791	171	184	LYYAPFDGILGLAY			12	1575.81	S2_Alone	0.167	1576.71	0.024078	0.049226	0.035158	9.08045	0.007141
P00791	171	184	LYYAPFDGILGLAY			12	1575.81	S2_Alone	1.667	1576.78	0.116405	0.118934	0.119191	9.08442	0.019301
P00791	171	184	LYYAPFDGILGLAY			12	1575.81	S2_Alone	16.667	1576.87	0.106875	0.203887	0.109903	9.05252	0.00649
P00791	171	184	LYYAPFDGILGLAY			12	1575.81	S2_Alone	166.667	1577.03	0.164548	0.363178	0.166531	9.08808	0.010257
P00791	171	184	LYYAPFDGILGLAY			12	1575.81	S2_FL_complex	0	1576.66	0.025618	0	0	9.0906	0.010377
P00791	171	184	LYYAPFDGILGLAY			12	1575.81	S2_FL_complex	0.167	1576.74	0.184317	0.078367	0.186088	9.07121	0.027797
P00791	171	184	LYYAPFDGILGLAY			12	1575.81	S2_FL_complex	1.667	1576.75	0.081289	0.084491	0.08523	9.05306	0.008843
P00791	171	184	LYYAPFDGILGLAY			12	1575.81	S2_FL_complex	16.667	1577.12	0.129916	0.456107	0.132418	9.06613	0.027952
P00791	171	184	LYYAPFDGILGLAY			12	1575.81	S2_FL_complex	166.667	1577.21	0.795212	0.547324	0.795625	9.08902	0.038383
P00791	172	180	YYAPFDGIL			7	1058.52	S2_3A3Fab_complex	0	1059.09	0.019903	0	0	8.61652	0.004729
P00791	172	180	YYAPFDGIL			7	1058.52	S2_3A3Fab_complex	0.167	1059.16	0.016905	0.069944	0.026113	8.62158	0.003109
P00791	172	180	YYAPFDGIL			7	1058.52	S2_3A3Fab_complex	1.667	1059.2	0.040843	0.101995	0.045434	8.60969	0.016343
P00791	172	180	YYAPFDGIL			7	1058.52	S2_3A3Fab_complex	16.667	1059.19	0.017959	0.098618	0.026808	8.6116	0.00544
P00791	172	180	YYAPFDGIL			7	1058.52	S2_3A3Fab_complex	166.667	1059.18	0.021095	0.082246	0.029002	8.59921	0.01596
P00791	172	180	YYAPFDGIL			7	1058.52	S2_Alone	0	1059.09	0.019903	0	0	8.61652	0.004729
P00791	172	180	YYAPFDGIL			7	1058.52	S2_Alone	0.167	1059.19	0.028766	0.100325	0.03498	8.60072	0.015501
P00791	172	180	YYAPFDGIL			7	1058.52	S2_Alone	1.667	1059.19	0.024709	0.09609	0.031727	8.61201	0.008229
P00791	172	180	YYAPFDGIL			7	1058.52	S2_Alone	16.667	1059.2	0.029237	0.109668	0.035368	8.61625	0.006178
P00791	172	180	YYAPFDGIL			7	1058.52	S2_Alone	166.667	1059.15	0.029124	0.061225	0.035275	8.62185	0.00859
P00791	172	180	YYAPFDGIL			7	1058.52	S2_FL_complex	0	1059.09	0.019903	0	0	8.61652	0.004729
P00791	172	180	YYAPFDGIL			7	1058.52	S2_FL_complex	0.167	1059.19	0.010845	0.099779	0.022666	8.61586	0.010614
P00791	172	180	YYAPFDGIL			7	1058.52	S2_FL_complex	1.667	1059.17	0.008658	0.073743	0.021704	8.60537	0.016008
P00791	172	180	YYAPFDGIL			7	1058.52	S2_FL_complex	16.667	1059.17	0.029264	0.076157	0.035391	8.61717	0.005901
P00791	172	180	YYAPFDGIL			7	1058.52	S2_FL_complex	166.667	1059.21	0.0232	0.11437	0.030567	8.59586	0.011325
P00791	172	181	YYAPFDGILG			8	1115.54	S2_3A3Fab_complex	0	1116.1	0.157761	0	0	8.49386	0.004721
P00791	172	181	YYAPFDGILG			8	1115.54	S2_3A3Fab_complex	0.167	1116.2	0.031868	0.103597	0.160947	8.50461	0.002924
P00791	172	181	YYAPFDGILG			8	1115.54	S2_3A3Fab_complex	1.667	1116.34	0.406439	0.238326	0.435983	8.49439	0.013361
P00791	172	181	YYAPFDGILG			8	1115.54	S2_3A3Fab_complex	16.667	1116.29	0.029345	0.18925	0.160467	8.49383	0.003832
P00791	172	181	YYAPFDGILG			8	1115.54	S2_3A3Fab_complex	166.667	1116.37	0.230885	0.266774	0.279636	8.48653	0.012712
P00791	172	181	YYAPFDGILG			8	1115.54	S2_Alone	0	1116.1	0.157761	0	0	8.49386	0.004721
P00791	172	181	YYAPFDGILG			8	1115.54	S2_Alone	0.167	1116.29	0.145893	0.190464	0.21488	8.48489	0.011999
P00791	172	181	YYAPFDGILG			8	1115.54	S2_Alone	1.667	1116.51	0.293003	0.413628	0.332775	8.49333	0.007482
P00791	172	181	YYAPFDGILG			8	1115.54	S2_Alone	16.667	1116.45	1.07568	0.34876	1.08718	8.50126	0.01093
P00791	172	181	YYAPFDGILG			8	1115.54	S2_Alone	166.667	1116.39	0.611113	0.286097	0.631148	8.50072	0.010367
P00791	172	181	YYAPFDGILG			8	1115.54	S2_FL_complex	0	1116.1	0.157761	0	0	8.49386	0.004721
P00791	172	181	YYAPFDGILG			8	1115.54	S2_FL_complex	0.167	1116.29	0.314889	0.185667	0.352198	8.49791	0.010663
P00791	172	181	YYAPFDGILG			8	1115.54	S2_FL_complex	1.667	1116.88	2.23219	0.784264	2.23775	8.4882	0.023772
P00791	172	181	YYAPFDGILG			8	1115.54	S2_FL_complex	16.667	1116.29	0.221475	0.185197	0.271918	8.49847	0.003607
P00791	172	181	YYAPFDGILG			8	1115.54	S2_FL_complex	166.667	1116.33	0.012281	0.228737	0.158238	8.48365	0.008317
P00791	175	181	PFDGILG			5	718.377	S2_3A3Fab_complex	0	718.701	0.02549	0	0	8.64479	0.004331
P00791	175	181	PFDGILG			5	718.377	S2_3A3Fab_complex	0.167	718.737	0.070051	0.036168	0.074544	8.63987	0.004443
P00791	175	181	PFDGILG			5	718.377	S2_3A3Fab_complex	1.667	718.825	0.036009	0.123918	0.044118	8.62636	0.015471
P00791	175	181	PFDGILG			5	718.377	S2_3A3Fab_complex	16.667	718.809	0.053452	0.10791	0.059218	8.63561	0.009804
P00791	175	181	PFDGILG			5	718.377	S2_3A3Fab_complex	166.667	718.768	0.064613	0.066704	0.06946	8.62131	0.019636
P00791	175	181	PFDGILG			5	718.377	S2_Alone	0	718.701	0.02549	0	0	8.64479	0.004331
P00791	175	181	PFDGILG			5	718.377	S2_Alone	0.167	718.8	0.026903	0.09833	0.037061	8.62277	0.018362
P00791	175	181	PFDGILG			5	718.377	S2_Alone	1.667	718.779	0.040108	0.077707	0.047523	8.63353	0.010509
P00791	175	181	PFDGILG			5	718.377	S2_Alone	16.667	718.773	0.083954	0.071671	0.087738	8.63629	0.011237
P00791	175	181	PFDGILG			5	718.377	S2_Alone	166.667	718.81	0.108307	0.108313	0.111267	8.6419	0.009436
P00791	175	181	PFDGILG			5	718.377	S2_FL_complex	0	718.701	0.02549	0	0	8.64479	0.004331
P00791	175	181	PFDGILG			5	718.377	S2_FL_complex	0.167	718.851	0.085193	0.150223	0.088925	8.6395	0.013577
P00791	175	181	PFDGILG			5	718.377	S2_FL_complex	1.667	718.774	0.081574	0.072987	0.085464	8.62489	0.018324
P00791	175	181	PFDGILG			5	718.377	S2_FL_complex	16.667	718.81	0.059059	0.108303	0.064325	8.63803	0.007292
P00791	175	181	PFDGILG			5	718.377	S2_FL_complex	166.667	718.857	0.055329	0.155459	0.060918	8.61724	0.01598
P00791	181	196	GLAYPSISASGATPVF			13	1537.79	S2_3A3Fab_complex	0	1542.54	0.336763	0	0	7.96382	0.019294
P00791	181	196	GLAYPSISASGATPVF			13	1537.79	S2_3A3Fab_complex	0.167	1543.45	0.032199	0.905132	0.338298	7.97125	0.002188
P00791	181	196	GLAYPSISASGATPVF			13	1537.79	S2_3A3Fab_complex	1.667	1543.97	0.044822	1.42145	0.339732	7.96884	0.0083
P00791	181	196	GLAYPSISASGATPVF			13	1537.79	S2_3A3Fab_complex	16.667	1544.26	0.076174	1.71319	0.34527	7.95209	0.010181
P00791	181	196	GLAYPSISASGATPVF			13	1537.79	S2_3A3Fab_complex	166.667	1544.31	0.10922	1.76681	0.354031	7.96477	0.006336
P00791	181	196	GLAYPSISASGATPVF			13	1537.79	S2_Alone	0	1542.54	0.336763	0	0	7.96382	0.019294
P00791	181	196	GLAYPSISASGATPVF			13	1537.79	S2_Alone	0.167	1543.57	0.154576	1.02868	0.370544	7.96528	0.015977
P00791	181	196	GLAYPSISASGATPVF			13	1537.79	S2_Alone	1.667	1543.98	0.118189	1.43208	0.3569	7.96939	0.016153
P00791	181	196	GLAYPSISASGATPVF			13	1537.79	S2_Alone	16.667	1544.31	0.061313	1.76779	0.342299	7.97978	0.006288
P00791	181	196	GLAYPSISASGATPVF			13	1537.79	S2_Alone	166.667	1544.35	0.078094	1.80843	0.345699	7.96875	0.020162
P00791	181	196	GLAYPSISASGATPVF			13	1537.79	S2_FL_complex	0	1542.54	0.336763	0	0	7.96382	0.019294
P00791	181	196	GLAYPSISASGATPVF			13	1537.79	S2_FL_complex	0.167	1543.52	0.023751	0.973578	0.337599	7.96063	0.015827
P00791	181	196	GLAYPSISASGATPVF			13	1537.79	S2_FL_complex	1.667	1543.92	0.034471	1.37099	0.338522	7.95703	0.007952
P00791	181	196	GLAYPSISASGATPVF			13	1537.79	S2_FL_complex	16.667	1544.25	0.074856	1.70694	0.344982	7.95734	0.014814
P00791	181	196	GLAYPSISASGATPVF			13	1537.79	S2_FL_complex	166.667	1544.4	0.041812	1.85383	0.339348	7.94639	0.004213
P00791	181	199	GLAYPSISASGATPVFDNL			16	1879.94	S2_3A3Fab_complex	0	1881	0.033902	0	0	8.10133	0.012466
P00791	181	199	GLAYPSISASGATPVFDNL			16	1879.94	S2_3A3Fab_complex	0.167	1881.26	0.1222	0.259975	0.126815	8.11004	0.006358
P00791	181	199	GLAYPSISASGATPVFDNL			16	1879.94	S2_3A3Fab_complex	1.667	1881.28	0.089499	0.278074	0.095705	8.10562	0.010822
P00791	181	199	GLAYPSISASGATPVFDNL			16	1879.94	S2_3A3Fab_complex	16.667	1881.35	0.06549	0.346771	0.073745	8.10393	0.012083
P00791	181	199	GLAYPSISASGATPVFDNL			16	1879.94	S2_3A3Fab_complex	166.667	1881.43	0.075688	0.42981	0.082934	8.1098	0.008158
P00791	181	199	GLAYPSISASGATPVFDNL			16	1879.94	S2_Alone	0	1881	0.033902	0	0	8.10133	0.012466
P00791	181	199	GLAYPSISASGATPVFDNL			16	1879.94	S2_Alone	0.167	1881.47	0.166809	0.467305	0.170219	8.0913	0.011484
P00791	181	199	GLAYPSISASGATPVFDNL			16	1879.94	S2_Alone	1.667	1881.32	0.14327	0.322878	0.147227	8.1005	0.015375
P00791	181	199	GLAYPSISASGATPVFDNL			16	1879.94	S2_Alone	16.667	1881.32	0.059488	0.318753	0.068471	8.12141	0.007545
P00791	181	199	GLAYPSISASGATPVFDNL			16	1879.94	S2_Alone	166.667	1881.43	0.095642	0.429151	0.101473	8.10853	0.017972
P00791	181	199	GLAYPSISASGATPVFDNL			16	1879.94	S2_FL_complex	0	1881	0.033902	0	0	8.10133	0.012466
P00791	181	199	GLAYPSISASGATPVFDNL			16	1879.94	S2_FL_complex	0.167	1881.42	0.070495	0.421111	0.078223	8.09931	0.010054
P00791	181	199	GLAYPSISASGATPVFDNL			16	1879.94	S2_FL_complex	1.667	1881.22	0.084683	0.222647	0.091217	8.09528	0.011799
P00791	181	199	GLAYPSISASGATPVFDNL			16	1879.94	S2_FL_complex	16.667	1881.29	0.164695	0.285493	0.168148	8.11088	0.015023
P00791	181	199	GLAYPSISASGATPVFDNL			16	1879.94	S2_FL_complex	166.667	1881.56	0.061108	0.554983	0.069883	8.09743	0.001966
P00791	182	196	LAYPSISASGATPVF			12	1480.77	S2_3A3Fab_complex	0	1481.59	0.01643	0	0	7.90272	0.011819
P00791	182	196	LAYPSISASGATPVF			12	1480.77	S2_3A3Fab_complex	0.167	1482.01	0.119242	0.423378	0.120369	7.93749	0.003191
P00791	182	196	LAYPSISASGATPVF			12	1480.77	S2_3A3Fab_complex	1.667	1481.89	0.078335	0.299712	0.080039	7.93342	0.009375
P00791	182	196	LAYPSISASGATPVF			12	1480.77	S2_3A3Fab_complex	16.667	1481.98	0.063853	0.395429	0.065933	7.91317	0.016219
P00791	182	196	LAYPSISASGATPVF			12	1480.77	S2_3A3Fab_complex	166.667	1481.98	0.014008	0.386469	0.021591	7.92424	0.010648
P00791	182	196	LAYPSISASGATPVF			12	1480.77	S2_Alone	0	1481.59	0.01643	0	0	7.90272	0.011819
P00791	182	196	LAYPSISASGATPVF			12	1480.77	S2_Alone	0.167	1481.88	0.046018	0.289076	0.048863	7.90874	0.016459
P00791	182	196	LAYPSISASGATPVF			12	1480.77	S2_Alone	1.667	1481.95	0.105747	0.356995	0.107016	7.91645	0.022224
P00791	182	196	LAYPSISASGATPVF			12	1480.77	S2_Alone	16.667	1481.92	0.052546	0.332583	0.055055	7.92864	0.008244
P00791	182	196	LAYPSISASGATPVF			12	1480.77	S2_Alone	166.667	1481.88	0.063632	0.287959	0.065719	7.91557	0.024256
P00791	182	196	LAYPSISASGATPVF			12	1480.77	S2_FL_complex	0	1481.59	0.01643	0	0	7.90272	0.011819
P00791	182	196	LAYPSISASGATPVF			12	1480.77	S2_FL_complex	0.167	1481.91	0.106695	0.320323	0.107952	7.91931	0.018197
P00791	182	196	LAYPSISASGATPVF			12	1480.77	S2_FL_complex	1.667	1481.94	0.131031	0.346844	0.132057	7.92138	0.016212
P00791	182	196	LAYPSISASGATPVF			12	1480.77	S2_FL_complex	16.667	1481.96	0.170084	0.368788	0.170875	7.92296	0.017509
P00791	182	196	LAYPSISASGATPVF			12	1480.77	S2_FL_complex	166.667	1481.99	0.038602	0.405039	0.041953	7.90805	0.007502
P00791	182	199	LAYPSISASGATPVFDNL			15	1822.92	S2_3A3Fab_complex	0	1823.98	0.02405	0	0	8.08361	0.012021
P00791	182	199	LAYPSISASGATPVFDNL			15	1822.92	S2_3A3Fab_complex	0.167	1824.19	0.01416	0.210338	0.027909	8.10612	0.002097
P00791	182	199	LAYPSISASGATPVFDNL			15	1822.92	S2_3A3Fab_complex	1.667	1824.31	0.08459	0.327382	0.087942	8.09877	0.013055
P00791	182	199	LAYPSISASGATPVFDNL			15	1822.92	S2_3A3Fab_complex	16.667	1824.3	0.087689	0.315972	0.090928	8.08785	0.010916
P00791	182	199	LAYPSISASGATPVFDNL			15	1822.92	S2_3A3Fab_complex	166.667	1824.36	0.086882	0.37717	0.09015	8.0938	0.009887
P00791	182	199	LAYPSISASGATPVFDNL			15	1822.92	S2_Alone	0	1823.98	0.02405	0	0	8.08361	0.012021
P00791	182	199	LAYPSISASGATPVFDNL			15	1822.92	S2_Alone	0.167	1824.37	0.113936	0.389333	0.116446	8.08063	0.012022
P00791	182	199	LAYPSISASGATPVFDNL			15	1822.92	S2_Alone	1.667	1824.27	0.08674	0.291877	0.090012	8.09009	0.013408
P00791	182	199	LAYPSISASGATPVFDNL			15	1822.92	S2_Alone	16.667	1824.29	0.062814	0.312121	0.06726	8.10453	0.0067
P00791	182	199	LAYPSISASGATPVFDNL			15	1822.92	S2_Alone	166.667	1824.31	0.080334	0.326134	0.083857	8.09039	0.016064
P00791	182	199	LAYPSISASGATPVFDNL			15	1822.92	S2_FL_complex	0	1823.98	0.02405	0	0	8.08361	0.012021
P00791	182	199	LAYPSISASGATPVFDNL			15	1822.92	S2_FL_complex	0.167	1824.32	0.029958	0.338492	0.038417	8.09143	0.014095
P00791	182	199	LAYPSISASGATPVFDNL			15	1822.92	S2_FL_complex	1.667	1824.26	0.025244	0.277482	0.034867	8.0897	0.017428
P00791	182	199	LAYPSISASGATPVFDNL			15	1822.92	S2_FL_complex	16.667	1824.28	0.132716	0.2942	0.134877	8.09779	0.015907
P00791	182	199	LAYPSISASGATPVFDNL			15	1822.92	S2_FL_complex	166.667	1824.42	0.079242	0.443576	0.082811	8.08392	0.005626
P00791	185	199	PSISASGATPVFDNL			12	1475.74	S2_3A3Fab_complex	0	1476.51	0.031263	0	0	7.84248	0.010821
P00791	185	199	PSISASGATPVFDNL			12	1475.74	S2_3A3Fab_complex	0.167	1476.82	1.06034	0.311803	1.0608	7.88949	0.027784
P00791	185	199	PSISASGATPVFDNL			12	1475.74	S2_3A3Fab_complex	1.667	1476.91	0.630886	0.400437	0.63166	7.89105	0.015785
P00791	185	199	PSISASGATPVFDNL			12	1475.74	S2_3A3Fab_complex	16.667	1476.72	0.159239	0.2078	0.162279	7.86146	0.021798
P00791	185	199	PSISASGATPVFDNL			12	1475.74	S2_3A3Fab_complex	166.667	1476.75	0.04945	0.245653	0.058503	7.87254	0.013643
P00791	185	199	PSISASGATPVFDNL			12	1475.74	S2_Alone	0	1476.51	0.031263	0	0	7.84248	0.010821
P00791	185	199	PSISASGATPVFDNL			12	1475.74	S2_Alone	0.167	1476.85	0.054568	0.344039	0.062889	7.84559	0.009956
P00791	185	199	PSISASGATPVFDNL			12	1475.74	S2_Alone	1.667	1476.71	0.137439	0.20505	0.140949	7.85451	0.018017
P00791	185	199	PSISASGATPVFDNL			12	1475.74	S2_Alone	16.667	1476.87	0.207773	0.359613	0.210111	7.88003	0.006977
P00791	185	199	PSISASGATPVFDNL			12	1475.74	S2_Alone	166.667	1476.77	0.116652	0.263544	0.120768	7.859	0.023151
P00791	185	199	PSISASGATPVFDNL			12	1475.74	S2_FL_complex	0	1476.51	0.031263	0	0	7.84248	0.010821
P00791	185	199	PSISASGATPVFDNL			12	1475.74	S2_FL_complex	0.167	1476.73	0.044306	0.22699	0.054225	7.86546	0.023117
P00791	185	199	PSISASGATPVFDNL			12	1475.74	S2_FL_complex	1.667	1476.72	0.202276	0.216137	0.204678	7.871	0.020678
P00791	185	199	PSISASGATPVFDNL			12	1475.74	S2_FL_complex	16.667	1476.6	0.254533	0.092431	0.256446	7.87325	0.025168
P00791	185	199	PSISASGATPVFDNL			12	1475.74	S2_FL_complex	166.667	1476.9	0.070689	0.387319	0.077294	7.85285	0.008514
P00791	200	209	WDQGLVSQDL			9	1160.56	S2_3A3Fab_complex	0	1161.14	0.007896	0	0	7.75015	0.013829
P00791	200	209	WDQGLVSQDL			9	1160.56	S2_3A3Fab_complex	0.167	1161.3	0.029269	0.153175	0.030315	7.7884	0.00228
P00791	200	209	WDQGLVSQDL			9	1160.56	S2_3A3Fab_complex	1.667	1161.34	0.031028	0.202091	0.032016	7.78185	0.009907
P00791	200	209	WDQGLVSQDL			9	1160.56	S2_3A3Fab_complex	16.667	1161.34	0.036475	0.193434	0.037319	7.76125	0.018662
P00791	200	209	WDQGLVSQDL			9	1160.56	S2_3A3Fab_complex	166.667	1161.34	0.033805	0.19479	0.034714	7.77824	0.010657
P00791	200	209	WDQGLVSQDL			9	1160.56	S2_Alone	0	1161.14	0.007896	0	0	7.75015	0.013829
P00791	200	209	WDQGLVSQDL			9	1160.56	S2_Alone	0.167	1161.35	0.032365	0.204567	0.033314	7.75772	0.014414
P00791	200	209	WDQGLVSQDL			9	1160.56	S2_Alone	1.667	1161.34	0.027112	0.194119	0.028238	7.7609	0.023694
P00791	200	209	WDQGLVSQDL			9	1160.56	S2_Alone	16.667	1161.35	0.026868	0.211802	0.028004	7.78522	0.008255
P00791	200	209	WDQGLVSQDL			9	1160.56	S2_Alone	166.667	1161.35	0.02787	0.204002	0.028967	7.76058	0.022351
P00791	200	209	WDQGLVSQDL			9	1160.56	S2_FL_complex	0	1161.14	0.007896	0	0	7.75015	0.013829
P00791	200	209	WDQGLVSQDL			9	1160.56	S2_FL_complex	0.167	1161.35	0.015944	0.206893	0.017792	7.77119	0.022377
P00791	200	209	WDQGLVSQDL			9	1160.56	S2_FL_complex	1.667	1161.32	0.039121	0.180292	0.039909	7.78056	0.013216
P00791	200	209	WDQGLVSQDL			9	1160.56	S2_FL_complex	16.667	1161.34	0.039435	0.197872	0.040217	7.77577	0.022808
P00791	200	209	WDQGLVSQDL			9	1160.56	S2_FL_complex	166.667	1161.34	0.005556	0.198828	0.009654	7.75767	0.009104
P00791	200	210	WDQGLVSQDLF			10	1307.63	S2_3A3Fab_complex	0	1308.29	0.022714	0	0	8.38147	0.005156
P00791	200	210	WDQGLVSQDLF			10	1307.63	S2_3A3Fab_complex	0.167	1308.19	0.05808	-0.102907	0.062364	8.38438	0.00915
P00791	200	210	WDQGLVSQDLF			10	1307.63	S2_3A3Fab_complex	1.667	1308.61	0.117662	0.316689	0.119835	8.36407	0.004363
P00791	200	210	WDQGLVSQDLF			10	1307.63	S2_3A3Fab_complex	16.667	1308.4	0.012625	0.107001	0.025987	8.37205	0.006247
P00791	200	210	WDQGLVSQDLF			10	1307.63	S2_3A3Fab_complex	166.667	1308.46	0.029633	0.172422	0.037337	8.36925	0.011092
P00791	200	210	WDQGLVSQDLF			10	1307.63	S2_Alone	0	1308.29	0.022714	0	0	8.38147	0.005156
P00791	200	210	WDQGLVSQDLF			10	1307.63	S2_Alone	0.167	1308.57	0.156747	0.278186	0.158384	8.36952	0.014392
P00791	200	210	WDQGLVSQDLF			10	1307.63	S2_Alone	1.667	1308.84	1.06464	0.545579	1.06488	8.37824	0.018202
P00791	200	210	WDQGLVSQDLF			10	1307.63	S2_Alone	16.667	1308.48	0.094501	0.194913	0.097192	8.38143	0.003831
P00791	200	210	WDQGLVSQDLF			10	1307.63	S2_Alone	166.667	1308.5	0.233745	0.206703	0.234846	8.37517	0.004071
P00791	200	210	WDQGLVSQDLF			10	1307.63	S2_FL_complex	0	1308.29	0.022714	0	0	8.38147	0.005156
P00791	200	210	WDQGLVSQDLF			10	1307.63	S2_FL_complex	0.167	1308.36	0.126172	0.073253	0.1282	8.38131	0.010739
P00791	200	210	WDQGLVSQDLF			10	1307.63	S2_FL_complex	1.667	1308.58	0.692711	0.288508	0.693083	8.36106	0.026163
P00791	200	210	WDQGLVSQDLF			10	1307.63	S2_FL_complex	16.667	1308.48	0.050551	0.189453	0.05542	8.38058	0.005409
P00791	200	210	WDQGLVSQDLF			10	1307.63	S2_FL_complex	166.667	1308.94	1.71667	0.654391	1.71682	8.35879	0.011267
P00791	200	211	WDQGLVSQDLFS			11	1394.66	S2_3A3Fab_complex	0	1395.39	0.028221	0	0	8.21342	0.011217
P00791	200	211	WDQGLVSQDLFS			11	1394.66	S2_3A3Fab_complex	0.167	1404	2.73982	8.61103	2.73997	8.24679	0.014353
P00791	200	211	WDQGLVSQDLFS			11	1394.66	S2_3A3Fab_complex	1.667	1401.36	4.63084	5.96816	4.63093	8.22701	0.017412
P00791	200	211	WDQGLVSQDLFS			11	1394.66	S2_3A3Fab_complex	16.667	1399.21	4.68903	3.81323	4.68912	8.2269	0.016514
P00791	200	211	WDQGLVSQDLFS			11	1394.66	S2_3A3Fab_complex	166.667	1399.75	4.5593	4.35421	4.55939	8.22851	0.014722
P00791	200	211	WDQGLVSQDLFS			11	1394.66	S2_Alone	0	1395.39	0.028221	0	0	8.21342	0.011217
P00791	200	211	WDQGLVSQDLFS			11	1394.66	S2_Alone	0.167	1395.72	0.090906	0.325366	0.095186	8.20519	0.012367
P00791	200	211	WDQGLVSQDLFS			11	1394.66	S2_Alone	1.667	1399.54	4.54497	4.15057	4.54506	8.21947	0.02343
P00791	200	211	WDQGLVSQDLFS			11	1394.66	S2_Alone	16.667	1402.42	4.26996	7.02448	4.27005	8.23404	0.004817
P00791	200	211	WDQGLVSQDLFS			11	1394.66	S2_Alone	166.667	1400.76	4.72212	5.36292	4.72221	8.20867	0.020393
P00791	200	211	WDQGLVSQDLFS			11	1394.66	S2_FL_complex	0	1395.39	0.028221	0	0	8.21342	0.011217
P00791	200	211	WDQGLVSQDLFS			11	1394.66	S2_FL_complex	0.167	1400.27	4.61698	4.877	4.61707	8.21348	0.020186
P00791	200	211	WDQGLVSQDLFS			11	1394.66	S2_FL_complex	1.667	1397.58	3.59218	2.18449	3.59229	8.23161	0.012527
P00791	200	211	WDQGLVSQDLFS			11	1394.66	S2_FL_complex	16.667	1395.87	0.50669	0.47242	0.507476	8.2194	0.010759
P00791	200	211	WDQGLVSQDLFS			11	1394.66	S2_FL_complex	166.667	1395.86	0.160835	0.469589	0.163292	8.20613	0.008298
P00791	210	225	FSVYLSSNDDSGSVVL			15	1688.8	S2_3A3Fab_complex	0	1689.78	0.093403	0	0	8.01053	0.016583
P00791	210	225	FSVYLSSNDDSGSVVL			15	1688.8	S2_3A3Fab_complex	0.167	1692.2	1.0957	2.41695	1.09968	8.06606	0.006115
P00791	210	225	FSVYLSSNDDSGSVVL			15	1688.8	S2_3A3Fab_complex	1.667	1690.33	2.16468	0.550711	2.1667	8.01884	0.007646
P00791	210	225	FSVYLSSNDDSGSVVL			15	1688.8	S2_3A3Fab_complex	16.667	1690.52	2.14517	0.740334	2.14721	8.01392	0.014946
P00791	210	225	FSVYLSSNDDSGSVVL			15	1688.8	S2_3A3Fab_complex	166.667	1690.11	1.79507	0.327673	1.7975	8.00967	0.006994
P00791	210	225	FSVYLSSNDDSGSVVL			15	1688.8	S2_Alone	0	1689.78	0.093403	0	0	8.01053	0.016583
P00791	210	225	FSVYLSSNDDSGSVVL			15	1688.8	S2_Alone	0.167	1690.06	0.063011	0.274248	0.11267	8.01057	0.015089
P00791	210	225	FSVYLSSNDDSGSVVL			15	1688.8	S2_Alone	1.667	1690.27	0.916758	0.484981	0.921504	8.0397	0.017365
P00791	210	225	FSVYLSSNDDSGSVVL			15	1688.8	S2_Alone	16.667	1690.12	0.495562	0.337887	0.504287	8.03985	0.00655
P00791	210	225	FSVYLSSNDDSGSVVL			15	1688.8	S2_Alone	166.667	1690.09	0.354887	0.308973	0.366973	8.02169	0.022711
P00791	210	225	FSVYLSSNDDSGSVVL			15	1688.8	S2_FL_complex	0	1689.78	0.093403	0	0	8.01053	0.016583
P00791	210	225	FSVYLSSNDDSGSVVL			15	1688.8	S2_FL_complex	0.167	1691.46	1.40205	1.68124	1.40515	8.03694	0.029259
P00791	210	225	FSVYLSSNDDSGSVVL			15	1688.8	S2_FL_complex	1.667	1693.2	2.22904	3.41632	2.231	8.05794	0.015367
P00791	210	225	FSVYLSSNDDSGSVVL			15	1688.8	S2_FL_complex	16.667	1694.37	4.90484	4.58793	4.90573	8.05505	0.019817
P00791	210	225	FSVYLSSNDDSGSVVL			15	1688.8	S2_FL_complex	166.667	1691.32	2.33078	1.53864	2.33265	8.00819	0.01457
P00791	212	225	VYLSSNDDSGSVVL			13	1454.7	S2_3A3Fab_complex	0	1455.41	0.058776	0	0	7.556	0.033286
P00791	212	225	VYLSSNDDSGSVVL			13	1454.7	S2_3A3Fab_complex	0.167	1456.98	3.83135	1.57069	3.83181	7.62366	0.021379
P00791	212	225	VYLSSNDDSGSVVL			13	1454.7	S2_3A3Fab_complex	1.667	1457.6	3.84754	2.19701	3.84799	7.58925	0.022124
P00791	212	225	VYLSSNDDSGSVVL			13	1454.7	S2_3A3Fab_complex	16.667	1456.52	1.80627	1.11041	1.80722	7.6212	0.010767
P00791	212	225	VYLSSNDDSGSVVL			13	1454.7	S2_3A3Fab_complex	166.667	1456.93	0.595481	1.52324	0.598375	7.61506	0.008726
P00791	212	225	VYLSSNDDSGSVVL			13	1454.7	S2_Alone	0	1455.39	0.061047	0	0	7.55314	0.029709
P00791	212	225	VYLSSNDDSGSVVL			13	1454.7	S2_Alone	0.167	1455.73	0.761663	0.340645	0.764106	7.59351	0.015291
P00791	212	225	VYLSSNDDSGSVVL			13	1454.7	S2_Alone	1.667	1456.84	2.42928	1.44573	2.43005	7.57888	0.00387
P00791	212	225	VYLSSNDDSGSVVL			13	1454.7	S2_Alone	16.667	1456.38	1.9035	0.990432	1.90448	7.63011	0.013261
P00791	212	225	VYLSSNDDSGSVVL			13	1454.7	S2_Alone	166.667	1458.39	1.87591	2.99553	1.8769	7.59296	0.003057
P00791	212	225	VYLSSNDDSGSVVL			13	1454.7	S2_FL_complex	0	1455.39	0.061047	0	0	7.55314	0.029709
P00791	212	225	VYLSSNDDSGSVVL			13	1454.7	S2_FL_complex	0.167	1457.33	3.55881	1.94446	3.55933	7.60828	0.028689
P00791	212	225	VYLSSNDDSGSVVL			13	1454.7	S2_FL_complex	1.667	1455.84	1.29747	0.453839	1.2989	7.60495	0.013874
P00791	212	225	VYLSSNDDSGSVVL			13	1454.7	S2_FL_complex	16.667	1455.91	0.238724	0.522302	0.246406	7.60727	0.023197
P00791	212	225	VYLSSNDDSGSVVL			13	1454.7	S2_FL_complex	166.667	1457.21	1.87097	1.82232	1.87196	7.60409	0.012237
P00791	226	233	LGGIDSSY			7	811.383	S2_3A3Fab_complex	0	812.037	0.879648	0	0	7.0359	0.025792
P00791	226	233	LGGIDSSY			7	811.383	S2_3A3Fab_complex	0.167	812.18	1.47111	0.142869	1.71404	7.10909	0.011673
P00791	226	233	LGGIDSSY			7	811.383	S2_3A3Fab_complex	1.667	812.398	0.652196	0.360633	1.09505	7.11175	0.006455
P00791	226	233	LGGIDSSY			7	811.383	S2_3A3Fab_complex	16.667	812.616	0.189516	0.578422	0.899831	7.08156	0.043428
P00791	226	233	LGGIDSSY			7	811.383	S2_3A3Fab_complex	166.667	812.583	0.579409	0.546396	1.05333	7.10558	0.008314
P00791	226	233	LGGIDSSY			7	811.383	S2_Alone	0	812.037	0.879648	0	0	7.0359	0.025792
P00791	226	233	LGGIDSSY			7	811.383	S2_Alone	0.167	812.423	0.489942	0.386033	1.00689	7.07301	0.034921
P00791	226	233	LGGIDSSY			7	811.383	S2_Alone	1.667	812.433	0.401859	0.395564	0.967094	7.07064	0.045771
P00791	226	233	LGGIDSSY			7	811.383	S2_Alone	16.667	812.739	0.743543	0.701593	1.1518	7.10681	0.010033
P00791	226	233	LGGIDSSY			7	811.383	S2_Alone	166.667	812.756	0.373331	0.719355	0.955592	7.05695	0.033271
P00791	226	233	LGGIDSSY			7	811.383	S2_FL_complex	0	812.037	0.879648	0	0	7.0359	0.025792
P00791	226	233	LGGIDSSY			7	811.383	S2_FL_complex	0.167	812.314	0.587294	0.276692	1.05768	7.07513	0.041745
P00791	226	233	LGGIDSSY			7	811.383	S2_FL_complex	1.667	812.746	0.858182	0.708937	1.22893	7.09251	0.008947
P00791	226	233	LGGIDSSY			7	811.383	S2_FL_complex	16.667	813.086	0.484005	1.04938	1.00401	7.09416	0.038018
P00791	226	233	LGGIDSSY			7	811.383	S2_FL_complex	166.667	813.249	1.1804	1.21208	1.47212	7.08021	0.014417
P00791	233	248	YYTGSLNWVPVSVEGY			14	1833.87	S2_3A3Fab_complex	0	1834.95	0.041883	0	0	8.31795	0.006274
P00791	233	248	YYTGSLNWVPVSVEGY			14	1833.87	S2_3A3Fab_complex	0.167	1835.1	0.135475	0.148973	0.141802	8.32602	0.003402
P00791	233	248	YYTGSLNWVPVSVEGY			14	1833.87	S2_3A3Fab_complex	1.667	1835.19	0.174282	0.232876	0.179244	8.31293	0.00712
P00791	233	248	YYTGSLNWVPVSVEGY			14	1833.87	S2_3A3Fab_complex	16.667	1835.17	0.110086	0.212706	0.117784	8.31564	0.002293
P00791	233	248	YYTGSLNWVPVSVEGY			14	1833.87	S2_3A3Fab_complex	166.667	1835.18	0.141151	0.224165	0.147234	8.31398	0.012393
P00791	233	248	YYTGSLNWVPVSVEGY			14	1833.87	S2_Alone	0	1834.95	0.041883	0	0	8.31795	0.006274
P00791	233	248	YYTGSLNWVPVSVEGY			14	1833.87	S2_Alone	0.167	1835.33	0.143607	0.378954	0.14959	8.30254	0.010131
P00791	233	248	YYTGSLNWVPVSVEGY			14	1833.87	S2_Alone	1.667	1835.27	0.108185	0.314805	0.11601	8.31523	0.008385
P00791	233	248	YYTGSLNWVPVSVEGY			14	1833.87	S2_Alone	16.667	1835.25	0.122926	0.302527	0.129865	8.32708	0.008799
P00791	233	248	YYTGSLNWVPVSVEGY			14	1833.87	S2_Alone	166.667	1835.18	0.116908	0.225005	0.124184	8.32237	0.009098
P00791	233	248	YYTGSLNWVPVSVEGY			14	1833.87	S2_FL_complex	0	1834.95	0.041883	0	0	8.31795	0.006274
P00791	233	248	YYTGSLNWVPVSVEGY			14	1833.87	S2_FL_complex	0.167	1835.62	0.384699	0.671952	0.386972	8.31858	0.00931
P00791	233	248	YYTGSLNWVPVSVEGY			14	1833.87	S2_FL_complex	1.667	1835.54	0.350552	0.588614	0.353046	8.29866	0.014514
P00791	233	248	YYTGSLNWVPVSVEGY			14	1833.87	S2_FL_complex	16.667	1835.45	0.245053	0.494656	0.248606	8.3175	0.00342
P00791	233	248	YYTGSLNWVPVSVEGY			14	1833.87	S2_FL_complex	166.667	1835.57	0.193152	0.619531	0.197641	8.3029	0.008004
P00791	239	245	NWVPVSV			5	800.43	S2_3A3Fab_complex	0	800.844	0.254323	0	0	7.71481	0.003689
P00791	239	245	NWVPVSV			5	800.43	S2_3A3Fab_complex	0.167	801.933	1.10188	1.08867	1.13085	7.7318	0.012515
P00791	239	245	NWVPVSV			5	800.43	S2_3A3Fab_complex	1.667	803.589	1.86957	2.74514	1.88679	7.68652	0.032376
P00791	239	245	NWVPVSV			5	800.43	S2_3A3Fab_complex	16.667	801.111	0.531231	0.266858	0.588971	7.72027	0.009153
P00791	239	245	NWVPVSV			5	800.43	S2_3A3Fab_complex	166.667	800.944	0.052594	0.100284	0.259704	7.70698	0.011564
P00791	239	245	NWVPVSV			5	800.43	S2_Alone	0	800.844	0.254323	0	0	7.71481	0.003689
P00791	239	245	NWVPVSV			5	800.43	S2_Alone	0.167	804.459	2.49004	3.61508	2.50299	7.69393	0.029844
P00791	239	245	NWVPVSV			5	800.43	S2_Alone	1.667	801.595	0.444686	0.751047	0.512275	7.7394	0.029876
P00791	239	245	NWVPVSV			5	800.43	S2_Alone	16.667	801.188	0.243635	0.34366	0.352191	7.73529	0.007149
P00791	239	245	NWVPVSV			5	800.43	S2_Alone	166.667	800.979	0.393887	0.135299	0.468857	7.72425	0.023606
P00791	239	245	NWVPVSV			5	800.43	S2_FL_complex	0	800.844	0.254323	0	0	7.71481	0.003689
P00791	239	245	NWVPVSV			5	800.43	S2_FL_complex	0.167	805.479	2.11737	4.63489	2.13259	7.66643	0.031733
P00791	239	245	NWVPVSV			5	800.43	S2_FL_complex	1.667	800.822	0.081573	-0.02176	0.267085	7.70764	0.010403
P00791	239	245	NWVPVSV			5	800.43	S2_FL_complex	16.667	800.799	0.149613	-0.044758	0.295066	7.69974	0.037315
P00791	239	245	NWVPVSV			5	800.43	S2_FL_complex	166.667	804.916	2.39108	4.07184	2.40456	7.66356	0.063004
P00791	239	248	NWVPVSVEGY			8	1149.56	S2_3A3Fab_complex	0	1150.13	0.026119	0	0	7.86746	0.012725
P00791	239	248	NWVPVSVEGY			8	1149.56	S2_3A3Fab_complex	0.167	1150.07	0.088684	-0.062309	0.09245	7.89388	0.004075
P00791	239	248	NWVPVSVEGY			8	1149.56	S2_3A3Fab_complex	1.667	1150.27	0.041661	0.141695	0.049172	7.88826	0.014754
P00791	239	248	NWVPVSVEGY			8	1149.56	S2_3A3Fab_complex	16.667	1150.27	0.051028	0.134751	0.057324	7.87452	0.017372
P00791	239	248	NWVPVSVEGY			8	1149.56	S2_3A3Fab_complex	166.667	1150.26	0.056352	0.127875	0.062111	7.88862	0.011606
P00791	239	248	NWVPVSVEGY			8	1149.56	S2_Alone	0	1150.13	0.026119	0	0	7.86746	0.012725
P00791	239	248	NWVPVSVEGY			8	1149.56	S2_Alone	0.167	1150.23	0.046712	0.104196	0.053519	7.87358	0.013836
P00791	239	248	NWVPVSVEGY			8	1149.56	S2_Alone	1.667	1150.24	0.040566	0.111527	0.048248	7.88077	0.019671
P00791	239	248	NWVPVSVEGY			8	1149.56	S2_Alone	16.667	1150.23	0.020431	0.100311	0.033161	7.89815	0.006941
P00791	239	248	NWVPVSVEGY			8	1149.56	S2_Alone	166.667	1150.2	0.01813	0.073468	0.031795	7.8791	0.020203
P00791	239	248	NWVPVSVEGY			8	1149.56	S2_FL_complex	0	1150.13	0.026119	0	0	7.86746	0.012725
P00791	239	248	NWVPVSVEGY			8	1149.56	S2_FL_complex	0.167	1150.26	0.059543	0.128376	0.06502	7.88038	0.021143
P00791	239	248	NWVPVSVEGY			8	1149.56	S2_FL_complex	1.667	1150.19	0.049505	0.05783	0.055973	7.88368	0.016391
P00791	239	248	NWVPVSVEGY			8	1149.56	S2_FL_complex	16.667	1150.25	0.05758	0.115022	0.063227	7.88119	0.019851
P00791	239	248	NWVPVSVEGY			8	1149.56	S2_FL_complex	166.667	1150.28	0.048852	0.145014	0.055396	7.87083	0.01038
P00791	239	249	NWVPVSVEGYW			9	1335.64	S2_3A3Fab_complex	0	1336.45	0.069837	0	0	8.57307	0.00488
P00791	239	249	NWVPVSVEGYW			9	1335.64	S2_3A3Fab_complex	0.167	1336.96	0.823714	0.507724	0.826669	8.58651	0.006607
P00791	239	249	NWVPVSVEGYW			9	1335.64	S2_3A3Fab_complex	1.667	1336.64	0.176114	0.184211	0.189455	8.57215	0.014671
P00791	239	249	NWVPVSVEGYW			9	1335.64	S2_3A3Fab_complex	16.667	1336.59	0.117778	0.131493	0.136926	8.57392	0.004168
P00791	239	249	NWVPVSVEGYW			9	1335.64	S2_3A3Fab_complex	166.667	1336.56	0.060113	0.106034	0.092146	8.56522	0.019128
P00791	239	249	NWVPVSVEGYW			9	1335.64	S2_Alone	0	1336.45	0.069837	0	0	8.57307	0.00488
P00791	239	249	NWVPVSVEGYW			9	1335.64	S2_Alone	0.167	1336.66	0.073356	0.20972	0.101284	8.55887	0.017946
P00791	239	249	NWVPVSVEGYW			9	1335.64	S2_Alone	1.667	1336.66	0.099188	0.207515	0.121307	8.57258	0.007728
P00791	239	249	NWVPVSVEGYW			9	1335.64	S2_Alone	16.667	1336.8	0.088363	0.350839	0.112629	8.57947	0.006524
P00791	239	249	NWVPVSVEGYW			9	1335.64	S2_Alone	166.667	1336.75	0.064109	0.298644	0.0948	8.58204	0.011427
P00791	239	249	NWVPVSVEGYW			9	1335.64	S2_FL_complex	0	1336.45	0.069837	0	0	8.57307	0.00488
P00791	239	249	NWVPVSVEGYW			9	1335.64	S2_FL_complex	0.167	1336.75	0.073438	0.300279	0.101343	8.57614	0.010928
P00791	239	249	NWVPVSVEGYW			9	1335.64	S2_FL_complex	1.667	1336.74	0.089994	0.290306	0.113912	8.56447	0.019801
P00791	239	249	NWVPVSVEGYW			9	1335.64	S2_FL_complex	16.667	1336.71	0.13722	0.252998	0.153969	8.57726	0.005736
P00791	239	249	NWVPVSVEGYW			9	1335.64	S2_FL_complex	166.667	1336.68	0.13399	0.228315	0.151098	8.55421	0.013939
P00791	247	253	GYWQITL			6	880.456	S2_3A3Fab_complex	0	880.888	0.046218	0	0	8.45803	0.00489
P00791	247	253	GYWQITL			6	880.456	S2_3A3Fab_complex	0.167	880.87	0.027187	-0.017859	0.053621	8.46847	0.004637
P00791	247	253	GYWQITL			6	880.456	S2_3A3Fab_complex	1.667	880.82	0.023194	-0.067468	0.051711	8.45919	0.013418
P00791	247	253	GYWQITL			6	880.456	S2_3A3Fab_complex	16.667	880.877	0.061874	-0.010711	0.07723	8.46201	0.005101
P00791	247	253	GYWQITL			6	880.456	S2_3A3Fab_complex	166.667	880.91	0.069574	0.021962	0.083526	8.45304	0.011969
P00791	247	253	GYWQITL			6	880.456	S2_Alone	0	880.888	0.046218	0	0	8.45803	0.00489
P00791	247	253	GYWQITL			6	880.456	S2_Alone	0.167	880.911	0.040503	0.023633	0.061454	8.44628	0.011511
P00791	247	253	GYWQITL			6	880.456	S2_Alone	1.667	880.904	0.061877	0.016053	0.077232	8.45634	0.008451
P00791	247	253	GYWQITL			6	880.456	S2_Alone	16.667	880.828	0.051574	-0.059352	0.069253	8.46742	0.002792
P00791	247	253	GYWQITL			6	880.456	S2_Alone	166.667	880.934	0.080878	0.046512	0.093153	8.46063	0.010489
P00791	247	253	GYWQITL			6	880.456	S2_FL_complex	0	880.888	0.046218	0	0	8.45803	0.00489
P00791	247	253	GYWQITL			6	880.456	S2_FL_complex	0.167	880.833	0.021787	-0.054601	0.051096	8.46591	0.008465
P00791	247	253	GYWQITL			6	880.456	S2_FL_complex	1.667	880.812	0.048943	-0.075359	0.067317	8.4491	0.016101
P00791	247	253	GYWQITL			6	880.456	S2_FL_complex	16.667	880.886	0.061576	-0.001932	0.076991	8.46585	0.004346
P00791	247	253	GYWQITL			6	880.456	S2_FL_complex	166.667	880.914	0.063668	0.025838	0.078675	8.44762	0.007918
P00791	254	270	DSITMDGETIACSGGCQ			16	1687.66	S2_3A3Fab_complex	0	1688.68	0.018877	0	0	7.3683	0.017835
P00791	254	270	DSITMDGETIACSGGCQ			16	1687.66	S2_3A3Fab_complex	0.167	1688.89	0.199601	0.208768	0.200492	7.41628	0.00168
P00791	254	270	DSITMDGETIACSGGCQ			16	1687.66	S2_3A3Fab_complex	1.667	1689.22	0.066079	0.545431	0.068722	7.41633	0.005552
P00791	254	270	DSITMDGETIACSGGCQ			16	1687.66	S2_3A3Fab_complex	16.667	1689.48	0.228213	0.803231	0.228992	7.39044	0.028285
P00791	254	270	DSITMDGETIACSGGCQ			16	1687.66	S2_3A3Fab_complex	166.667	1689.36	0.270953	0.682513	0.27161	7.40208	0.018123
P00791	254	270	DSITMDGETIACSGGCQ			16	1687.66	S2_Alone	0	1688.68	0.018877	0	0	7.3683	0.017835
P00791	254	270	DSITMDGETIACSGGCQ			16	1687.66	S2_Alone	0.167	1689.34	0.097285	0.664635	0.0991	7.38442	0.021805
P00791	254	270	DSITMDGETIACSGGCQ			16	1687.66	S2_Alone	1.667	1689.39	0.164601	0.709763	0.16568	7.38842	0.031872
P00791	254	270	DSITMDGETIACSGGCQ			16	1687.66	S2_Alone	16.667	1689.46	0.05215	0.786556	0.055461	7.4135	0.009741
P00791	254	270	DSITMDGETIACSGGCQ			16	1687.66	S2_Alone	166.667	1689.43	0.107878	0.755977	0.109517	7.37865	0.026701
P00791	254	270	DSITMDGETIACSGGCQ			16	1687.66	S2_FL_complex	0	1688.68	0.018877	0	0	7.3683	0.017835
P00791	254	270	DSITMDGETIACSGGCQ			16	1687.66	S2_FL_complex	0.167	1689.32	0.176842	0.644176	0.177846	7.40256	0.030972
P00791	254	270	DSITMDGETIACSGGCQ			16	1687.66	S2_FL_complex	1.667	1689.52	1.81171	0.837775	1.81181	7.40575	0.027675
P00791	254	270	DSITMDGETIACSGGCQ			16	1687.66	S2_FL_complex	16.667	1690.36	2.39176	1.68233	2.39183	7.41138	0.021873
P00791	254	270	DSITMDGETIACSGGCQ			16	1687.66	S2_FL_complex	166.667	1689.73	3.41097	1.05205	3.41103	7.38807	0.016249
P00791	254	271	DSITMDGETIACSGGCQA			17	1758.7	S2_3A3Fab_complex	0	1759.75	0.039731	0	0	7.40033	0.016459
P00791	254	271	DSITMDGETIACSGGCQA			17	1758.7	S2_3A3Fab_complex	0.167	1760.25	0.194737	0.493727	0.198749	7.44848	0.003341
P00791	254	271	DSITMDGETIACSGGCQA			17	1758.7	S2_3A3Fab_complex	1.667	1760.8	1.51639	1.0443	1.51691	7.44336	0.009887
P00791	254	271	DSITMDGETIACSGGCQA			17	1758.7	S2_3A3Fab_complex	16.667	1760.53	0.492581	0.774087	0.494181	7.41911	0.027966
P00791	254	271	DSITMDGETIACSGGCQA			17	1758.7	S2_3A3Fab_complex	166.667	1760.7	1.219	0.948978	1.21965	7.44246	0.014336
P00791	254	271	DSITMDGETIACSGGCQA			17	1758.7	S2_Alone	0	1759.75	0.039731	0	0	7.40033	0.016459
P00791	254	271	DSITMDGETIACSGGCQA			17	1758.7	S2_Alone	0.167	1760.46	0.080543	0.707144	0.089809	7.41395	0.021852
P00791	254	271	DSITMDGETIACSGGCQA			17	1758.7	S2_Alone	1.667	1760.55	0.792837	0.795675	0.793832	7.41104	0.026394
P00791	254	271	DSITMDGETIACSGGCQA			17	1758.7	S2_Alone	16.667	1760.58	0.185664	0.822234	0.189868	7.44071	0.011458
P00791	254	271	DSITMDGETIACSGGCQA			17	1758.7	S2_Alone	166.667	1760.59	0.11531	0.831996	0.121963	7.40952	0.02748
P00791	254	271	DSITMDGETIACSGGCQA			17	1758.7	S2_FL_complex	0	1759.75	0.039731	0	0	7.40033	0.016459
P00791	254	271	DSITMDGETIACSGGCQA			17	1758.7	S2_FL_complex	0.167	1760.67	1.90535	0.920602	1.90577	7.42148	0.031644
P00791	254	271	DSITMDGETIACSGGCQA			17	1758.7	S2_FL_complex	1.667	1760.22	0.134865	0.470286	0.140595	7.44314	0.016543
P00791	254	271	DSITMDGETIACSGGCQA			17	1758.7	S2_FL_complex	16.667	1760.5	0.183746	0.747768	0.187992	7.43432	0.033644
P00791	254	271	DSITMDGETIACSGGCQA			17	1758.7	S2_FL_complex	166.667	1760.5	0.278376	0.743853	0.281197	7.41544	0.013934
P00791	270	281	QAIVDTGTSLLT			11	1218.66	S2_3A3Fab_complex	0	1219.08	0.055844	0	0	6.39607	0.045552
P00791	270	281	QAIVDTGTSLLT			11	1218.66	S2_3A3Fab_complex	0.167	1220.06	0.395616	0.985651	0.399538	6.45108	0.005867
P00791	270	281	QAIVDTGTSLLT			11	1218.66	S2_3A3Fab_complex	1.667	1220.66	3.12487	1.58055	3.12537	6.42395	0.016585
P00791	270	281	QAIVDTGTSLLT			11	1218.66	S2_3A3Fab_complex	16.667	1220.6	1.28297	1.51954	1.28418	6.44368	0.042711
P00791	270	281	QAIVDTGTSLLT			11	1218.66	S2_3A3Fab_complex	166.667	1226.35	3.31969	7.27666	3.32016	6.44375	0.008508
P00791	270	281	QAIVDTGTSLLT			11	1218.66	S2_Alone	0	1219.05	0.064853	0	0	6.39612	0.046306
P00791	270	281	QAIVDTGTSLLT			11	1218.66	S2_Alone	0.167	1220.07	0.337713	1.01722	0.343884	6.40877	0.046735
P00791	270	281	QAIVDTGTSLLT			11	1218.66	S2_Alone	1.667	1220.31	1.12534	1.25956	1.1272	6.39473	0.049094
P00791	270	281	QAIVDTGTSLLT			11	1218.66	S2_Alone	16.667	1220.43	0.293728	1.38184	0.300802	6.45162	0.013606
P00791	270	281	QAIVDTGTSLLT			11	1218.66	S2_Alone	166.667	1221.09	0.304143	2.04411	0.31098	6.38896	0.047508
P00791	270	281	QAIVDTGTSLLT			11	1218.66	S2_FL_complex	0	1219.05	0.064853	0	0	6.39612	0.046306
P00791	270	281	QAIVDTGTSLLT			11	1218.66	S2_FL_complex	0.167	1219.44	2.09776	0.393567	2.09877	6.44504	0.023022
P00791	270	281	QAIVDTGTSLLT			11	1218.66	S2_FL_complex	1.667	1219.39	1.96457	0.341127	1.96564	6.42076	0.014057
P00791	270	281	QAIVDTGTSLLT			11	1218.66	S2_FL_complex	16.667	1224.94	2.18615	5.89198	2.18711	6.42954	0.044252
P00791	270	281	QAIVDTGTSLLT			11	1218.66	S2_FL_complex	166.667	1219.77	2.39841	0.717516	2.39929	6.41718	0.014236
P00791	271	279	AIVDTGTSL			8	876.467	S2_3A3Fab_complex	0	876.869	0.024774	0	0	7.05425	0.026748
P00791	271	279	AIVDTGTSL			8	876.467	S2_3A3Fab_complex	0.167	876.932	0.020146	0.062267	0.031932	7.1425	0.00438
P00791	271	279	AIVDTGTSL			8	876.467	S2_3A3Fab_complex	1.667	877.047	0.057801	0.177404	0.062886	7.12206	0.010837
P00791	271	279	AIVDTGTSL			8	876.467	S2_3A3Fab_complex	16.667	876.93	0.114954	0.06081	0.117593	7.08333	0.03923
P00791	271	279	AIVDTGTSL			8	876.467	S2_3A3Fab_complex	166.667	876.962	0.077341	0.093115	0.081212	7.11168	0.011579
P00791	271	279	AIVDTGTSL			8	876.467	S2_Alone	0	876.869	0.024774	0	0	7.05425	0.026748
P00791	271	279	AIVDTGTSL			8	876.467	S2_Alone	0.167	877.045	0.168082	0.176014	0.169898	7.09446	0.036043
P00791	271	279	AIVDTGTSL			8	876.467	S2_Alone	1.667	877.546	0.699798	0.676964	0.700236	7.10411	0.03223
P00791	271	279	AIVDTGTSL			8	876.467	S2_Alone	16.667	877.055	0.005037	0.185964	0.025281	7.11482	0.013173
P00791	271	279	AIVDTGTSL			8	876.467	S2_Alone	166.667	877.637	1.47599	0.767957	1.4762	7.07332	0.038179
P00791	271	279	AIVDTGTSL			8	876.467	S2_FL_complex	0	876.869	0.024774	0	0	7.05425	0.026748
P00791	271	279	AIVDTGTSL			8	876.467	S2_FL_complex	0.167	876.892	0.010286	0.022602	0.026825	7.10069	0.041978
P00791	271	279	AIVDTGTSL			8	876.467	S2_FL_complex	1.667	876.93	0.101177	0.060863	0.104166	7.11636	0.017607
P00791	271	279	AIVDTGTSL			8	876.467	S2_FL_complex	16.667	878.529	3.03211	1.65963	3.03221	7.08249	0.047447
P00791	271	279	AIVDTGTSL			8	876.467	S2_FL_complex	166.667	876.997	0.05743	0.127954	0.062545	7.07236	0.023469
P00791	272	279	IVDTGTSL			7	805.43	S2_3A3Fab_complex	0	805.816	0.020342	0	0	6.8347	0.027941
P00791	272	279	IVDTGTSL			7	805.43	S2_3A3Fab_complex	0.167	807.248	2.50836	1.4324	2.50845	6.90144	0.025834
P00791	272	279	IVDTGTSL			7	805.43	S2_3A3Fab_complex	1.667	805.979	0.035691	0.163454	0.041081	6.90969	0.00951
P00791	272	279	IVDTGTSL			7	805.43	S2_3A3Fab_complex	16.667	806.053	0.633413	0.237117	0.633739	6.85136	0.043645
P00791	272	279	IVDTGTSL			7	805.43	S2_3A3Fab_complex	166.667	805.962	0.046072	0.146741	0.050363	6.90436	0.012221
P00791	272	279	IVDTGTSL			7	805.43	S2_Alone	0	805.816	0.020342	0	0	6.8347	0.027941
P00791	272	279	IVDTGTSL			7	805.43	S2_Alone	0.167	805.996	0.020741	0.18065	0.029051	6.86435	0.036912
P00791	272	279	IVDTGTSL			7	805.43	S2_Alone	1.667	805.991	0.041047	0.175224	0.045811	6.8612	0.051374
P00791	272	279	IVDTGTSL			7	805.43	S2_Alone	16.667	806.302	0.575571	0.486279	0.575931	6.88295	0.054134
P00791	272	279	IVDTGTSL			7	805.43	S2_Alone	166.667	806.022	0.033332	0.206586	0.039049	6.84774	0.043182
P00791	272	279	IVDTGTSL			7	805.43	S2_FL_complex	0	805.816	0.020342	0	0	6.8347	0.027941
P00791	272	279	IVDTGTSL			7	805.43	S2_FL_complex	0.167	806.052	0.662611	0.236875	0.662923	6.86377	0.046434
P00791	272	279	IVDTGTSL			7	805.43	S2_FL_complex	1.667	805.955	0.109099	0.139209	0.110979	6.9047	0.015074
P00791	272	279	IVDTGTSL			7	805.43	S2_FL_complex	16.667	806.035	0.048563	0.219068	0.052651	6.88262	0.04866
P00791	272	279	IVDTGTSL			7	805.43	S2_FL_complex	166.667	806.015	0.021602	0.199004	0.029672	6.8613	0.031113
P00791	305	319	VISCSSIDSLPDIVF			13	1594.8	S2_3A3Fab_complex	0	1595.72	0.019651	0	0	8.62799	0.00513
P00791	305	319	VISCSSIDSLPDIVF			13	1594.8	S2_3A3Fab_complex	0.167	1595.81	0.043884	0.097498	0.048083	8.62458	0.003633
P00791	305	319	VISCSSIDSLPDIVF			13	1594.8	S2_3A3Fab_complex	1.667	1595.86	0.001492	0.144667	0.019708	8.61443	0.019103
P00791	305	319	VISCSSIDSLPDIVF			13	1594.8	S2_3A3Fab_complex	16.667	1595.84	0.03669	0.128134	0.041622	8.61285	0.010127
P00791	305	319	VISCSSIDSLPDIVF			13	1594.8	S2_3A3Fab_complex	166.667	1595.9	0.113057	0.179097	0.114752	8.60295	0.015612
P00791	305	319	VISCSSIDSLPDIVF			13	1594.8	S2_Alone	0	1595.72	0.019651	0	0	8.62799	0.00513
P00791	305	319	VISCSSIDSLPDIVF			13	1594.8	S2_Alone	0.167	1595.91	0.074312	0.190118	0.076866	8.61014	0.021528
P00791	305	319	VISCSSIDSLPDIVF			13	1594.8	S2_Alone	1.667	1595.96	0.052111	0.23918	0.055693	8.61401	0.01591
P00791	305	319	VISCSSIDSLPDIVF			13	1594.8	S2_Alone	16.667	1595.91	0.04675	0.195755	0.050712	8.62211	0.010187
P00791	305	319	VISCSSIDSLPDIVF			13	1594.8	S2_Alone	166.667	1595.92	0.068598	0.208642	0.071357	8.63283	0.008902
P00791	305	319	VISCSSIDSLPDIVF			13	1594.8	S2_FL_complex	0	1595.72	0.019651	0	0	8.62799	0.00513
P00791	305	319	VISCSSIDSLPDIVF			13	1594.8	S2_FL_complex	0.167	1595.91	0.052027	0.193778	0.055615	8.62063	0.014504
P00791	305	319	VISCSSIDSLPDIVF			13	1594.8	S2_FL_complex	1.667	1595.91	0.021702	0.190885	0.029277	8.59913	0.0222
P00791	305	319	VISCSSIDSLPDIVF			13	1594.8	S2_FL_complex	16.667	1595.85	0.062954	0.132736	0.06595	8.61824	0.008197
P00791	305	319	VISCSSIDSLPDIVF			13	1594.8	S2_FL_complex	166.667	1595.96	0.070034	0.244996	0.072738	8.5975	0.016696
P00791	309	319	SSIDSLPDIVF			9	1192.61	S2_3A3Fab_complex	0	1193.21	0.017223	0	0	8.48659	0.009284
P00791	309	319	SSIDSLPDIVF			9	1192.61	S2_3A3Fab_complex	0.167	1193.3	0.010289	0.089628	0.020062	8.49403	0.001562
P00791	309	319	SSIDSLPDIVF			9	1192.61	S2_3A3Fab_complex	1.667	1193.35	0.056171	0.137623	0.058752	8.49102	0.0133
P00791	309	319	SSIDSLPDIVF			9	1192.61	S2_3A3Fab_complex	16.667	1193.36	0.036796	0.147411	0.040627	8.47895	0.003658
P00791	309	319	SSIDSLPDIVF			9	1192.61	S2_3A3Fab_complex	166.667	1193.33	0.023184	0.11513	0.028881	8.48425	0.015461
P00791	309	319	SSIDSLPDIVF			9	1192.61	S2_Alone	0	1193.21	0.017223	0	0	8.48659	0.009284
P00791	309	319	SSIDSLPDIVF			9	1192.61	S2_Alone	0.167	1193.31	0.031106	0.091982	0.035556	8.48907	0.012524
P00791	309	319	SSIDSLPDIVF			9	1192.61	S2_Alone	1.667	1193.32	0.031944	0.109392	0.036291	8.48597	0.007673
P00791	309	319	SSIDSLPDIVF			9	1192.61	S2_Alone	16.667	1193.35	0.020211	0.135613	0.026554	8.4911	0.003722
P00791	309	319	SSIDSLPDIVF			9	1192.61	S2_Alone	166.667	1193.32	0.037258	0.109156	0.041046	8.49318	0.012656
P00791	309	319	SSIDSLPDIVF			9	1192.61	S2_FL_complex	0	1193.21	0.017223	0	0	8.48659	0.009284
P00791	309	319	SSIDSLPDIVF			9	1192.61	S2_FL_complex	0.167	1193.69	0.057038	0.475799	0.059581	8.47394	0.011572
P00791	309	319	SSIDSLPDIVF			9	1192.61	S2_FL_complex	1.667	1193.48	0.094927	0.260975	0.096476	8.47647	0.018314
P00791	309	319	SSIDSLPDIVF			9	1192.61	S2_FL_complex	16.667	1193.54	0.122922	0.328675	0.124123	8.47706	0.011462
P00791	309	319	SSIDSLPDIVF			9	1192.61	S2_FL_complex	166.667	1193.64	0.167308	0.422873	0.168192	8.46726	0.012796
P00791	311	319	IDSLPDIVF			7	1018.55	S2_3A3Fab_complex	0	1019.03	0.028622	0	0	8.5327	0.005579
P00791	311	319	IDSLPDIVF			7	1018.55	S2_3A3Fab_complex	0.167	1019.11	0.025214	0.086189	0.038144	8.53768	0.002079
P00791	311	319	IDSLPDIVF			7	1018.55	S2_3A3Fab_complex	1.667	1019.13	0.01042	0.104797	0.03046	8.52866	0.01283
P00791	311	319	IDSLPDIVF			7	1018.55	S2_3A3Fab_complex	16.667	1019.12	0.054448	0.097904	0.061513	8.52632	0.007573
P00791	311	319	IDSLPDIVF			7	1018.55	S2_3A3Fab_complex	166.667	1019.18	0.056261	0.155159	0.063124	8.52888	0.018564
P00791	311	319	IDSLPDIVF			7	1018.55	S2_Alone	0	1019.03	0.028622	0	0	8.5327	0.005579
P00791	311	319	IDSLPDIVF			7	1018.55	S2_Alone	0.167	1019.14	0.048424	0.113295	0.056251	8.52916	0.016725
P00791	311	319	IDSLPDIVF			7	1018.55	S2_Alone	1.667	1019.13	0.034033	0.099938	0.044469	8.52896	0.010778
P00791	311	319	IDSLPDIVF			7	1018.55	S2_Alone	16.667	1019.15	0.018234	0.123302	0.033937	8.53568	0.006902
P00791	311	319	IDSLPDIVF			7	1018.55	S2_Alone	166.667	1019.14	0.02121	0.1103	0.035624	8.54014	0.012218
P00791	311	319	IDSLPDIVF			7	1018.55	S2_FL_complex	0	1019.03	0.028622	0	0	8.5327	0.005579
P00791	311	319	IDSLPDIVF			7	1018.55	S2_FL_complex	0.167	1019.15	0.019786	0.124905	0.034795	8.53498	0.015963
P00791	311	319	IDSLPDIVF			7	1018.55	S2_FL_complex	1.667	1019.13	0.022337	0.106491	0.036307	8.52541	0.015128
P00791	311	319	IDSLPDIVF			7	1018.55	S2_FL_complex	16.667	1019.15	0.016199	0.127085	0.032889	8.53167	0.003427
P00791	311	319	IDSLPDIVF			7	1018.55	S2_FL_complex	166.667	1019.17	0.026387	0.142635	0.038929	8.51694	0.013771
P00791	320	332	TINGVQYPLSPSA			10	1346.7	S2_3A3Fab_complex	0	1347.36	0.053434	0	0	7.22133	0.030678
P00791	320	332	TINGVQYPLSPSA			10	1346.7	S2_3A3Fab_complex	0.167	1347.7	0.279865	0.342391	0.28492	7.22123	0.012551
P00791	320	332	TINGVQYPLSPSA			10	1346.7	S2_3A3Fab_complex	1.667	1348.25	0.351771	0.891699	0.355806	7.23008	0.021669
P00791	320	332	TINGVQYPLSPSA			10	1346.7	S2_3A3Fab_complex	16.667	1348	0.192682	0.642198	0.199954	7.2313	0.019102
P00791	320	332	TINGVQYPLSPSA			10	1346.7	S2_3A3Fab_complex	166.667	1348.47	0.118309	1.10882	0.129816	7.21831	0.004636
P00791	320	332	TINGVQYPLSPSA			10	1346.7	S2_Alone	0	1347.36	0.053434	0	0	7.22133	0.030678
P00791	320	332	TINGVQYPLSPSA			10	1346.7	S2_Alone	0.167	1347.88	0.640168	0.524265	0.642394	7.2106	0.030478
P00791	320	332	TINGVQYPLSPSA			10	1346.7	S2_Alone	1.667	1347.92	0.304876	0.561571	0.309523	7.24957	0.013022
P00791	320	332	TINGVQYPLSPSA			10	1346.7	S2_Alone	16.667	1348.14	0.284525	0.78215	0.289499	7.24672	0.015035
P00791	320	332	TINGVQYPLSPSA			10	1346.7	S2_Alone	166.667	1348.03	0.346946	0.668761	0.351037	7.23606	0.032894
P00791	320	332	TINGVQYPLSPSA			10	1346.7	S2_FL_complex	0	1347.36	0.053434	0	0	7.22133	0.030678
P00791	320	332	TINGVQYPLSPSA			10	1346.7	S2_FL_complex	0.167	1348.09	0.50989	0.73362	0.512682	7.21412	0.02783
P00791	320	332	TINGVQYPLSPSA			10	1346.7	S2_FL_complex	1.667	1348.37	0.932067	1.01481	0.933598	7.21315	0.012361
P00791	320	332	TINGVQYPLSPSA			10	1346.7	S2_FL_complex	16.667	1347.85	0.68341	0.490172	0.685496	7.23018	0.015357
P00791	320	332	TINGVQYPLSPSA			10	1346.7	S2_FL_complex	166.667	1349.03	1.75136	1.67457	1.75218	7.20442	0.01922
P00791	358	364	WILGDVF			6	849.451	S2_3A3Fab_complex	0	849.952	0.032335	0	0	8.94378	0.008309
P00791	358	364	WILGDVF			6	849.451	S2_3A3Fab_complex	0.167	850.034	0.016429	0.082186	0.03627	8.9293	0.002434
P00791	358	364	WILGDVF			6	849.451	S2_3A3Fab_complex	1.667	850.306	0.141228	0.354016	0.144882	8.91802	0.025884
P00791	358	364	WILGDVF			6	849.451	S2_3A3Fab_complex	16.667	850.068	0.03446	0.115907	0.047256	8.92641	0.015356
P00791	358	364	WILGDVF			6	849.451	S2_3A3Fab_complex	166.667	850.065	0.04039	0.113136	0.051739	8.89513	0.033819
P00791	358	364	WILGDVF			6	849.451	S2_Alone	0	849.952	0.032335	0	0	8.94378	0.008309
P00791	358	364	WILGDVF			6	849.451	S2_Alone	0.167	850.061	0.048741	0.109175	0.058492	8.91213	0.037224
P00791	358	364	WILGDVF			6	849.451	S2_Alone	1.667	850.075	0.054006	0.122887	0.062947	8.91506	0.030264
P00791	358	364	WILGDVF			6	849.451	S2_Alone	16.667	850.06	0.021703	0.107882	0.038944	8.92156	0.009426
P00791	358	364	WILGDVF			6	849.451	S2_Alone	166.667	850.116	0.059038	0.163653	0.067313	8.94538	0.00527
P00791	358	364	WILGDVF			6	849.451	S2_FL_complex	0	849.952	0.032335	0	0	8.94378	0.008309
P00791	358	364	WILGDVF			6	849.451	S2_FL_complex	0.167	850.061	0.014398	0.108365	0.035396	8.92816	0.02055
P00791	358	364	WILGDVF			6	849.451	S2_FL_complex	1.667	850.102	0.078134	0.150022	0.08456	8.90799	0.029187
P00791	358	364	WILGDVF			6	849.451	S2_FL_complex	16.667	850.05	0.036044	0.097517	0.048423	8.93241	0.017694
P00791	358	364	WILGDVF			6	849.451	S2_FL_complex	166.667	850.096	0.015119	0.143354	0.035695	8.89953	0.035245
P0DTC2	32	42	FTRGVYYPDKV			9	1344.69	S2_3A3Fab_complex	0	1345.5	0.035352	0	0	6.55653	0.042565
P0DTC2	32	42	FTRGVYYPDKV			9	1344.69	S2_3A3Fab_complex	0.167	1346.29	0.023801	0.792387	0.042617	6.61349	0.000901
P0DTC2	32	42	FTRGVYYPDKV			9	1344.69	S2_3A3Fab_complex	1.667	1346.62	0.04299	1.11811	0.055659	6.61278	0.007688
P0DTC2	32	42	FTRGVYYPDKV			9	1344.69	S2_3A3Fab_complex	16.667	1347.05	0.047756	1.54778	0.059417	6.5808	0.04643
P0DTC2	32	42	FTRGVYYPDKV			9	1344.69	S2_3A3Fab_complex	166.667	1347.93	0.052693	2.42744	0.063453	6.61624	0.012834
P0DTC2	32	42	FTRGVYYPDKV			9	1344.69	S2_Alone	0	1345.5	0.035352	0	0	6.55653	0.042565
P0DTC2	32	42	FTRGVYYPDKV			9	1344.69	S2_Alone	0.167	1346.33	0.043556	0.831911	0.056097	6.57528	0.041428
P0DTC2	32	42	FTRGVYYPDKV			9	1344.69	S2_Alone	1.667	1346.58	0.050954	1.08526	0.062017	6.58553	0.057463
P0DTC2	32	42	FTRGVYYPDKV			9	1344.69	S2_Alone	16.667	1347.05	0.056409	1.55321	0.066571	6.61319	0.012776
P0DTC2	32	42	FTRGVYYPDKV			9	1344.69	S2_Alone	166.667	1348.02	0.093766	2.5211	0.100209	6.55966	0.05319
P0DTC2	32	42	FTRGVYYPDKV			9	1344.69	S2_FL_complex	0	1345.5	0.035352	0	0	6.55653	0.042565
P0DTC2	32	42	FTRGVYYPDKV			9	1344.69	S2_FL_complex	0.167	1346.34	0.019049	0.837267	0.040158	6.593	0.044347
P0DTC2	32	42	FTRGVYYPDKV			9	1344.69	S2_FL_complex	1.667	1346.54	0.064829	1.0461	0.073842	6.6117	0.015891
P0DTC2	32	42	FTRGVYYPDKV			9	1344.69	S2_FL_complex	16.667	1347.03	0.016999	1.53103	0.039227	6.5885	0.049147
P0DTC2	32	42	FTRGVYYPDKV			9	1344.69	S2_FL_complex	166.667	1347.97	0.119397	2.47215	0.124521	6.577	0.03223
P0DTC2	32	43	FTRGVYYPDKVF			10	1491.76	S2_3A3Fab_complex	0	1492.74	0.044707	0	0	7.14732	0.034858
P0DTC2	32	43	FTRGVYYPDKVF			10	1491.76	S2_3A3Fab_complex	0.167	1493.51	0.007589	0.774516	0.045346	7.1876	0.00234
P0DTC2	32	43	FTRGVYYPDKVF			10	1491.76	S2_3A3Fab_complex	1.667	1494.03	0.024319	1.29312	0.050893	7.18317	0.009458
P0DTC2	32	43	FTRGVYYPDKVF			10	1491.76	S2_3A3Fab_complex	16.667	1494.73	0.052834	1.9981	0.069211	7.16274	0.034281
P0DTC2	32	43	FTRGVYYPDKVF			10	1491.76	S2_3A3Fab_complex	166.667	1495.65	0.116795	2.91215	0.125059	7.18989	0.014657
P0DTC2	32	43	FTRGVYYPDKVF			10	1491.76	S2_Alone	0	1492.74	0.044707	0	0	7.14732	0.034858
P0DTC2	32	43	FTRGVYYPDKVF			10	1491.76	S2_Alone	0.167	1493.61	0.028796	0.872314	0.053178	7.16049	0.029665
P0DTC2	32	43	FTRGVYYPDKVF			10	1491.76	S2_Alone	1.667	1494.05	0.063742	1.31126	0.077857	7.16707	0.041335
P0DTC2	32	43	FTRGVYYPDKVF			10	1491.76	S2_Alone	16.667	1494.82	0.044122	2.08449	0.062813	7.18788	0.010639
P0DTC2	32	43	FTRGVYYPDKVF			10	1491.76	S2_Alone	166.667	1495.71	0.081532	2.97579	0.092985	7.15253	0.038982
P0DTC2	32	43	FTRGVYYPDKVF			10	1491.76	S2_FL_complex	0	1492.74	0.044707	0	0	7.14732	0.034858
P0DTC2	32	43	FTRGVYYPDKVF			10	1491.76	S2_FL_complex	0.167	1493.48	0.071871	0.740734	0.084641	7.16808	0.033064
P0DTC2	32	43	FTRGVYYPDKVF			10	1491.76	S2_FL_complex	1.667	1493.97	0.02616	1.23987	0.051798	7.18278	0.015608
P0DTC2	32	43	FTRGVYYPDKVF			10	1491.76	S2_FL_complex	16.667	1494.69	0.040117	1.95207	0.060067	7.16842	0.036539
P0DTC2	32	43	FTRGVYYPDKVF			10	1491.76	S2_FL_complex	166.667	1495.64	0.090196	2.90533	0.100668	7.1505	0.023282
P0DTC2	32	53	FTRGVYYPDKVFRSSVLHSTQD			20	2602.3	S2_3A3Fab_complex	0	2603.77	0.068487	0	0	6.79515	0.035895
P0DTC2	32	53	FTRGVYYPDKVFRSSVLHSTQD			20	2602.3	S2_3A3Fab_complex	0.167	2605.97	0	2.19528	0.068487	6.87577	0
P0DTC2	32	53	FTRGVYYPDKVFRSSVLHSTQD			20	2602.3	S2_3A3Fab_complex	1.667	2607.23	0.144213	3.46042	0.15965	6.86698	0.008539
P0DTC2	32	53	FTRGVYYPDKVFRSSVLHSTQD			20	2602.3	S2_3A3Fab_complex	16.667	2608.74	0.255457	4.97043	0.264479	6.87174	0.00464
P0DTC2	32	53	FTRGVYYPDKVFRSSVLHSTQD			20	2602.3	S2_3A3Fab_complex	166.667	2610.37	0.126196	6.59747	0.143583	6.85364	0.003419
P0DTC2	32	53	FTRGVYYPDKVFRSSVLHSTQD			20	2602.3	S2_Alone	0	2603.77	0.068487	0	0	6.79515	0.035895
P0DTC2	32	53	FTRGVYYPDKVFRSSVLHSTQD			20	2602.3	S2_Alone	0.167	2606.17	0.193179	2.39922	0.20496	6.80556	0.033932
P0DTC2	32	53	FTRGVYYPDKVFRSSVLHSTQD			20	2602.3	S2_Alone	1.667	2607.34	0.139952	3.57033	0.155811	6.80714	0.0506
P0DTC2	32	53	FTRGVYYPDKVFRSSVLHSTQD			20	2602.3	S2_Alone	16.667	2608.68	0.200217	4.90886	0.211607	6.84337	0.013719
P0DTC2	32	53	FTRGVYYPDKVFRSSVLHSTQD			20	2602.3	S2_Alone	166.667	2610.5	0.046476	6.73068	0.082768	6.78706	0.039548
P0DTC2	32	53	FTRGVYYPDKVFRSSVLHSTQD			20	2602.3	S2_FL_complex	0	2603.77	0.068487	0	0	6.79515	0.035895
P0DTC2	32	53	FTRGVYYPDKVFRSSVLHSTQD			20	2602.3	S2_FL_complex	0.167	2606.08	0.258592	2.30575	0.267508	6.83915	0.043325
P0DTC2	32	53	FTRGVYYPDKVFRSSVLHSTQD			20	2602.3	S2_FL_complex	1.667	2607.16	0.229679	3.39244	0.239673	6.86028	0.008997
P0DTC2	32	53	FTRGVYYPDKVFRSSVLHSTQD			20	2602.3	S2_FL_complex	16.667	2608.78	0.14949	5.01237	0.164431	6.83163	0.042772
P0DTC2	32	53	FTRGVYYPDKVFRSSVLHSTQD			20	2602.3	S2_FL_complex	166.667	2610.33	0.187142	6.55891	0.19928	6.82137	0.027526
P0DTC2	44	53	RSSVLHSTQD			9	1129.56	S2_3A3Fab_complex	0	1130.15	0.05984	0	0	5.39259	0.062398
P0DTC2	44	53	RSSVLHSTQD			9	1129.56	S2_3A3Fab_complex	0.167	1131.2	0.00202	1.05312	0.059874	5.47139	0.003083
P0DTC2	44	53	RSSVLHSTQD			9	1129.56	S2_3A3Fab_complex	1.667	1131.7	0.05912	1.54404	0.084119	5.47567	0.008956
P0DTC2	44	53	RSSVLHSTQD			9	1129.56	S2_3A3Fab_complex	16.667	1132.15	0.072924	1.99984	0.094333	5.42593	0.067114
P0DTC2	44	53	RSSVLHSTQD			9	1129.56	S2_3A3Fab_complex	166.667	1132.56	0.03188	2.40638	0.067802	5.48118	0.015914
P0DTC2	44	53	RSSVLHSTQD			9	1129.56	S2_Alone	0	1130.15	0.05984	0	0	5.39259	0.062398
P0DTC2	44	53	RSSVLHSTQD			9	1129.56	S2_Alone	0.167	1131.19	0.033228	1.04256	0.068447	5.42354	0.056078
P0DTC2	44	53	RSSVLHSTQD			9	1129.56	S2_Alone	1.667	1131.74	0.08008	1.58922	0.099968	5.43159	0.081118
P0DTC2	44	53	RSSVLHSTQD			9	1129.56	S2_Alone	16.667	1132.12	0.045934	1.97031	0.075437	5.472	0.016532
P0DTC2	44	53	RSSVLHSTQD			9	1129.56	S2_Alone	166.667	1132.63	0.095983	2.47611	0.113109	5.3876	0.068944
P0DTC2	44	53	RSSVLHSTQD			9	1129.56	S2_FL_complex	0	1130.15	0.05984	0	0	5.39259	0.062398
P0DTC2	44	53	RSSVLHSTQD			9	1129.56	S2_FL_complex	0.167	1131.18	0.027208	1.02886	0.065735	5.4516	0.066262
P0DTC2	44	53	RSSVLHSTQD			9	1129.56	S2_FL_complex	1.667	1131.65	0.046528	1.49735	0.0758	5.48162	0.017849
P0DTC2	44	53	RSSVLHSTQD			9	1129.56	S2_FL_complex	16.667	1132.13	0.038581	1.97844	0.071199	5.42878	0.071448
P0DTC2	44	53	RSSVLHSTQD			9	1129.56	S2_FL_complex	166.667	1132.5	0.0751	2.34726	0.096025	5.43137	0.054151
P0DTC2	49	55	HSTQDLF			6	847.394	S2_3A3Fab_complex	0	847.837	0.014007	0	0	7.18362	0.034064
P0DTC2	49	55	HSTQDLF			6	847.394	S2_3A3Fab_complex	0.167	848.408	0.015589	0.571277	0.020957	7.22667	0.001937
P0DTC2	49	55	HSTQDLF			6	847.394	S2_3A3Fab_complex	1.667	848.504	0.017641	0.667218	0.022525	7.22405	0.007834
P0DTC2	49	55	HSTQDLF			6	847.394	S2_3A3Fab_complex	16.667	848.763	0.041695	0.926173	0.043985	7.19583	0.03457
P0DTC2	49	55	HSTQDLF			6	847.394	S2_3A3Fab_complex	166.667	849.281	0.061472	1.44392	0.063048	7.22596	0.0124
P0DTC2	49	55	HSTQDLF			6	847.394	S2_Alone	0	847.837	0.014007	0	0	7.18362	0.034064
P0DTC2	49	55	HSTQDLF			6	847.394	S2_Alone	0.167	848.45	0.003787	0.613289	0.01451	7.1967	0.030769
P0DTC2	49	55	HSTQDLF			6	847.394	S2_Alone	1.667	848.493	0.031645	0.655759	0.034607	7.20289	0.043148
P0DTC2	49	55	HSTQDLF			6	847.394	S2_Alone	16.667	848.774	0.033217	0.936902	0.036049	7.22579	0.010547
P0DTC2	49	55	HSTQDLF			6	847.394	S2_Alone	166.667	849.277	0.044757	1.4402	0.046897	7.18551	0.038967
P0DTC2	49	55	HSTQDLF			6	847.394	S2_FL_complex	0	847.837	0.014007	0	0	7.18362	0.034064
P0DTC2	49	55	HSTQDLF			6	847.394	S2_FL_complex	0.167	848.454	0.018015	0.616897	0.022819	7.20557	0.036939
P0DTC2	49	55	HSTQDLF			6	847.394	S2_FL_complex	1.667	848.474	0.01898	0.636959	0.023589	7.2202	0.012654
P0DTC2	49	55	HSTQDLF			6	847.394	S2_FL_complex	16.667	848.767	0.019613	0.930065	0.024101	7.19999	0.040325
P0DTC2	49	55	HSTQDLF			6	847.394	S2_FL_complex	166.667	849.224	0.037801	1.38716	0.040312	7.19191	0.024195
P0DTC2	49	56	HSTQDLFL			7	960.479	S2_3A3Fab_complex	0	960.967	0.012574	0	0	7.60269	0.022553
P0DTC2	49	56	HSTQDLFL			7	960.479	S2_3A3Fab_complex	0.167	961.547	0.009506	0.579255	0.015763	7.62957	0.002545
P0DTC2	49	56	HSTQDLFL			7	960.479	S2_3A3Fab_complex	1.667	961.625	0.027841	0.658012	0.030548	7.6263	0.009861
P0DTC2	49	56	HSTQDLFL			7	960.479	S2_3A3Fab_complex	16.667	961.903	0.039996	0.935944	0.041926	7.61017	0.021525
P0DTC2	49	56	HSTQDLFL			7	960.479	S2_3A3Fab_complex	166.667	962.347	0.034495	1.37964	0.036715	7.62715	0.012577
P0DTC2	49	56	HSTQDLFL			7	960.479	S2_Alone	0	960.972	0.014573	0	0	7.60274	0.022567
P0DTC2	49	56	HSTQDLFL			7	960.479	S2_Alone	0.167	961.574	0.028656	0.601897	0.032149	7.60739	0.020035
P0DTC2	49	56	HSTQDLFL			7	960.479	S2_Alone	1.667	961.605	0.048762	0.632835	0.050894	7.61343	0.027021
P0DTC2	49	56	HSTQDLFL			7	960.479	S2_Alone	16.667	961.897	0.03146	0.924937	0.034672	7.62788	0.008091
P0DTC2	49	56	HSTQDLFL			7	960.479	S2_Alone	166.667	962.343	0.03889	1.37114	0.041531	7.60325	0.026431
P0DTC2	49	56	HSTQDLFL			7	960.479	S2_FL_complex	0	960.972	0.014573	0	0	7.60274	0.022567
P0DTC2	49	56	HSTQDLFL			7	960.479	S2_FL_complex	0.167	961.568	0.019733	0.595846	0.024531	7.6175	0.023082
P0DTC2	49	56	HSTQDLFL			7	960.479	S2_FL_complex	1.667	961.604	0.033912	0.632404	0.036911	7.62442	0.009904
P0DTC2	49	56	HSTQDLFL			7	960.479	S2_FL_complex	16.667	961.906	0.023255	0.934357	0.027444	7.61376	0.026092
P0DTC2	49	56	HSTQDLFL			7	960.479	S2_FL_complex	166.667	962.352	0.034757	1.38063	0.037689	7.60338	0.012963
P0DTC2	49	58	HSTQDLFLPF			8	1204.6	S2_3A3Fab_complex	0	1205.2	0.047887	0	0	8.25216	0.013731
P0DTC2	49	58	HSTQDLFLPF			8	1204.6	S2_3A3Fab_complex	0.167	1205.71	0.076628	0.510391	0.090361	8.26594	0.003762
P0DTC2	49	58	HSTQDLFLPF			8	1204.6	S2_3A3Fab_complex	1.667	1205.57	0.047902	0.368444	0.067733	8.26079	0.010602
P0DTC2	49	58	HSTQDLFLPF			8	1204.6	S2_3A3Fab_complex	16.667	1206.02	0.112291	0.821481	0.122076	8.25722	0.007525
P0DTC2	49	58	HSTQDLFLPF			8	1204.6	S2_3A3Fab_complex	166.667	1206.38	0.072704	1.18437	0.087057	8.26075	0.016264
P0DTC2	49	58	HSTQDLFLPF			8	1204.6	S2_Alone	0	1205.2	0.047887	0	0	8.25216	0.013731
P0DTC2	49	58	HSTQDLFLPF			8	1204.6	S2_Alone	0.167	1205.69	0.078127	0.4902	0.091635	8.2441	0.023082
P0DTC2	49	58	HSTQDLFLPF			8	1204.6	S2_Alone	1.667	1205.57	0.049341	0.373283	0.068758	8.26217	0.009602
P0DTC2	49	58	HSTQDLFLPF			8	1204.6	S2_Alone	16.667	1206	0.119118	0.79525	0.128383	8.25829	0.007223
P0DTC2	49	58	HSTQDLFLPF			8	1204.6	S2_Alone	166.667	1206.42	0.124721	1.21813	0.133599	8.24797	0.015138
P0DTC2	49	58	HSTQDLFLPF			8	1204.6	S2_FL_complex	0	1205.2	0.047887	0	0	8.25216	0.013731
P0DTC2	49	58	HSTQDLFLPF			8	1204.6	S2_FL_complex	0.167	1205.69	0.086294	0.486139	0.09869	8.25681	0.016595
P0DTC2	49	58	HSTQDLFLPF			8	1204.6	S2_FL_complex	1.667	1205.58	0.050061	0.37696	0.069277	8.26564	0.010677
P0DTC2	49	58	HSTQDLFLPF			8	1204.6	S2_FL_complex	16.667	1205.94	0.088249	0.743294	0.100405	8.26161	0.0123
P0DTC2	49	58	HSTQDLFLPF			8	1204.6	S2_FL_complex	166.667	1206.37	0.093933	1.17216	0.105436	8.24727	0.008008
P0DTC2	85	91	PFNDGVY			5	811.362	S2_3A3Fab_complex	0	811.749	0.012643	0	0	7.36048	0.03189
P0DTC2	85	91	PFNDGVY			5	811.362	S2_3A3Fab_complex	0.167	812.344	0.050017	0.59509	0.051591	7.40131	0.002289
P0DTC2	85	91	PFNDGVY			5	811.362	S2_3A3Fab_complex	1.667	812.545	0.041184	0.796007	0.043081	7.39612	0.00889
P0DTC2	85	91	PFNDGVY			5	811.362	S2_3A3Fab_complex	16.667	812.823	0.06446	1.07416	0.065689	7.37607	0.031215
P0DTC2	85	91	PFNDGVY			5	811.362	S2_3A3Fab_complex	166.667	813.227	0.068634	1.47831	0.069789	7.40028	0.012086
P0DTC2	85	91	PFNDGVY			5	811.362	S2_Alone	0	811.749	0.012643	0	0	7.36048	0.03189
P0DTC2	85	91	PFNDGVY			5	811.362	S2_Alone	0.167	812.305	0.066377	0.55604	0.06757	7.37448	0.027921
P0DTC2	85	91	PFNDGVY			5	811.362	S2_Alone	1.667	812.602	0.083991	0.853509	0.084937	7.38267	0.036562
P0DTC2	85	91	PFNDGVY			5	811.362	S2_Alone	16.667	812.875	0.051998	1.12611	0.053513	7.39688	0.011196
P0DTC2	85	91	PFNDGVY			5	811.362	S2_Alone	166.667	813.256	0.037861	1.50768	0.039916	7.36184	0.037074
P0DTC2	85	91	PFNDGVY			5	811.362	S2_FL_complex	0	811.749	0.012643	0	0	7.36048	0.03189
P0DTC2	85	91	PFNDGVY			5	811.362	S2_FL_complex	0.167	812.321	0.033303	0.572032	0.035622	7.38044	0.032937
P0DTC2	85	91	PFNDGVY			5	811.362	S2_FL_complex	1.667	812.547	0.044573	0.798676	0.046331	7.39589	0.015362
P0DTC2	85	91	PFNDGVY			5	811.362	S2_FL_complex	16.667	812.833	0.044708	1.08415	0.046461	7.37818	0.03612
P0DTC2	85	91	PFNDGVY			5	811.362	S2_FL_complex	166.667	813.165	0.02698	1.4166	0.029796	7.36662	0.02082
P0DTC2	92	106	FASTEKSNIIRGWIF			14	1768.94	S2_3A3Fab_complex	0	1770.22	0.080251	0	0	7.92414	0.019463
P0DTC2	92	106	FASTEKSNIIRGWIF			14	1768.94	S2_3A3Fab_complex	0.167	1771.94	0.057712	1.71898	0.098848	7.94616	0.002404
P0DTC2	92	106	FASTEKSNIIRGWIF			14	1768.94	S2_3A3Fab_complex	1.667	1772.7	0.148127	2.481	0.168469	7.94172	0.009307
P0DTC2	92	106	FASTEKSNIIRGWIF			14	1768.94	S2_3A3Fab_complex	16.667	1773.04	0.12717	2.82221	0.150375	7.93085	0.012174
P0DTC2	92	106	FASTEKSNIIRGWIF			14	1768.94	S2_3A3Fab_complex	166.667	1773.42	0.228099	3.19541	0.241805	7.93829	0.008713
P0DTC2	92	106	FASTEKSNIIRGWIF			14	1768.94	S2_Alone	0	1770.22	0.080251	0	0	7.92414	0.019463
P0DTC2	92	106	FASTEKSNIIRGWIF			14	1768.94	S2_Alone	0.167	1772.1	0.213515	1.87945	0.228098	7.92495	0.014933
P0DTC2	92	106	FASTEKSNIIRGWIF			14	1768.94	S2_Alone	1.667	1772.69	0.182983	2.46342	0.199808	7.9305	0.016632
P0DTC2	92	106	FASTEKSNIIRGWIF			14	1768.94	S2_Alone	16.667	1773.08	0.104609	2.86253	0.131846	7.94125	0.006063
P0DTC2	92	106	FASTEKSNIIRGWIF			14	1768.94	S2_Alone	166.667	1773.51	0.151324	3.29049	0.171287	7.92764	0.018877
P0DTC2	92	106	FASTEKSNIIRGWIF			14	1768.94	S2_FL_complex	0	1770.22	0.080251	0	0	7.92414	0.019463
P0DTC2	92	106	FASTEKSNIIRGWIF			14	1768.94	S2_FL_complex	0.167	1772.05	0.055929	1.82357	0.097818	7.93388	0.015521
P0DTC2	92	106	FASTEKSNIIRGWIF			14	1768.94	S2_FL_complex	1.667	1772.6	0.121696	2.37546	0.145775	7.93898	0.007527
P0DTC2	92	106	FASTEKSNIIRGWIF			14	1768.94	S2_FL_complex	16.667	1773.03	0.074738	2.81104	0.109663	7.93395	0.01754
P0DTC2	92	106	FASTEKSNIIRGWIF			14	1768.94	S2_FL_complex	166.667	1773.55	0.151361	3.32681	0.17132	7.92385	0.007238
P0DTC2	93	106	ASTEKSNIIRGWIF			13	1621.87	S2_3A3Fab_complex	0	1622.88	0.033448	0	0	7.85671	0.018254
P0DTC2	93	106	ASTEKSNIIRGWIF			13	1621.87	S2_3A3Fab_complex	0.167	1624.71	0.042623	1.83811	0.05418	7.88657	0.001112
P0DTC2	93	106	ASTEKSNIIRGWIF			13	1621.87	S2_3A3Fab_complex	1.667	1625.43	0.191247	2.55356	0.19415	7.88391	0.01018
P0DTC2	93	106	ASTEKSNIIRGWIF			13	1621.87	S2_3A3Fab_complex	16.667	1625.76	0.106981	2.88591	0.112088	7.86397	0.015321
P0DTC2	93	106	ASTEKSNIIRGWIF			13	1621.87	S2_3A3Fab_complex	166.667	1626.2	0.15711	3.31867	0.160631	7.8767	0.009902
P0DTC2	93	106	ASTEKSNIIRGWIF			13	1621.87	S2_Alone	0	1622.88	0.033448	0	0	7.85671	0.018254
P0DTC2	93	106	ASTEKSNIIRGWIF			13	1621.87	S2_Alone	0.167	1624.85	0.205921	1.97685	0.20862	7.85839	0.01593
P0DTC2	93	106	ASTEKSNIIRGWIF			13	1621.87	S2_Alone	1.667	1625.35	0.207164	2.47201	0.209847	7.86394	0.020772
P0DTC2	93	106	ASTEKSNIIRGWIF			13	1621.87	S2_Alone	16.667	1625.75	0.093143	2.87729	0.098966	7.877	0.006191
P0DTC2	93	106	ASTEKSNIIRGWIF			13	1621.87	S2_Alone	166.667	1626.21	0.144801	3.33585	0.148614	7.86022	0.022413
P0DTC2	93	106	ASTEKSNIIRGWIF			13	1621.87	S2_FL_complex	0	1622.88	0.033448	0	0	7.85671	0.018254
P0DTC2	93	106	ASTEKSNIIRGWIF			13	1621.87	S2_FL_complex	0.167	1624.85	0.16228	1.97018	0.165691	7.87347	0.019297
P0DTC2	93	106	ASTEKSNIIRGWIF			13	1621.87	S2_FL_complex	1.667	1625.23	0.222052	2.3562	0.224557	7.87514	0.00892
P0DTC2	93	106	ASTEKSNIIRGWIF			13	1621.87	S2_FL_complex	16.667	1625.83	0.200872	2.95189	0.203638	7.86771	0.019961
P0DTC2	93	106	ASTEKSNIIRGWIF			13	1621.87	S2_FL_complex	166.667	1626.16	0.225922	3.27994	0.228384	7.86959	0.009943
P0DTC2	95	103	TEKSNIIRG			8	1017.57	S2_3A3Fab_complex	0	1018.12	0.046456	0	0	5.64444	0.058459
P0DTC2	95	103	TEKSNIIRG			8	1017.57	S2_3A3Fab_complex	0.167	1020.07	0.090028	1.9528	0.101308	5.71376	0.002741
P0DTC2	95	103	TEKSNIIRG			8	1017.57	S2_3A3Fab_complex	1.667	1020.54	0.09409	2.41386	0.104934	5.7173	0.00876
P0DTC2	95	103	TEKSNIIRG			8	1017.57	S2_3A3Fab_complex	16.667	1021.03	0.057876	2.91184	0.074215	5.67375	0.063321
P0DTC2	95	103	TEKSNIIRG			8	1017.57	S2_3A3Fab_complex	166.667	1021.4	0.114382	3.27827	0.123456	5.7246	0.015459
P0DTC2	95	103	TEKSNIIRG			8	1017.57	S2_Alone	0	1018.12	0.046456	0	0	5.64444	0.058459
P0DTC2	95	103	TEKSNIIRG			8	1017.57	S2_Alone	0.167	1020.12	0.036123	2.00115	0.058848	5.67574	0.053429
P0DTC2	95	103	TEKSNIIRG			8	1017.57	S2_Alone	1.667	1020.5	0.175474	2.3775	0.18152	5.66317	0.079192
P0DTC2	95	103	TEKSNIIRG			8	1017.57	S2_Alone	16.667	1021.01	0.076848	2.88472	0.089799	5.71649	0.018615
P0DTC2	95	103	TEKSNIIRG			8	1017.57	S2_Alone	166.667	1021.4	0.134624	3.28218	0.142414	5.64891	0.070369
P0DTC2	95	103	TEKSNIIRG			8	1017.57	S2_FL_complex	0	1018.12	0.046456	0	0	5.64444	0.058459
P0DTC2	95	103	TEKSNIIRG			8	1017.57	S2_FL_complex	0.167	1020.05	0.049704	1.93152	0.068034	5.69459	0.059671
P0DTC2	95	103	TEKSNIIRG			8	1017.57	S2_FL_complex	1.667	1020.51	0.177934	2.39136	0.183899	5.71499	0.019661
P0DTC2	95	103	TEKSNIIRG			8	1017.57	S2_FL_complex	16.667	1020.98	0.067475	2.86197	0.081921	5.68225	0.066759
P0DTC2	95	103	TEKSNIIRG			8	1017.57	S2_FL_complex	166.667	1021.35	0.058273	3.22676	0.074525	5.66824	0.05015
P0DTC2	96	103	EKSNIIRG			7	916.521	S2_3A3Fab_complex	0	917.034	0.051274	0	0	5.54052	0.065337
P0DTC2	96	103	EKSNIIRG			7	916.521	S2_3A3Fab_complex	0.167	917.965	0.032111	0.930919	0.060499	5.61674	0.002935
P0DTC2	96	103	EKSNIIRG			7	916.521	S2_3A3Fab_complex	1.667	918.55	0.033328	1.51626	0.061153	5.61793	0.005748
P0DTC2	96	103	EKSNIIRG			7	916.521	S2_3A3Fab_complex	16.667	919.041	0.059317	2.00786	0.078406	5.57092	0.067745
P0DTC2	96	103	EKSNIIRG			7	916.521	S2_3A3Fab_complex	166.667	919.384	0.002065	2.35054	0.051315	5.60688	0.003069
P0DTC2	96	103	EKSNIIRG			7	916.521	S2_Alone	0	917.034	0.051274	0	0	5.54052	0.065337
P0DTC2	96	103	EKSNIIRG			7	916.521	S2_Alone	0.167	917.982	0.064722	0.948253	0.082571	5.57325	0.057936
P0DTC2	96	103	EKSNIIRG			7	916.521	S2_Alone	1.667	918.56	0.104869	1.52602	0.116732	5.51808	0.069581
P0DTC2	96	103	EKSNIIRG			7	916.521	S2_Alone	16.667	919.062	0.068604	2.02843	0.085647	5.60796	0.015006
P0DTC2	96	103	EKSNIIRG			7	916.521	S2_Alone	166.667	919.441	0.07231	2.40758	0.088644	5.50864	0.060827
P0DTC2	96	103	EKSNIIRG			7	916.521	S2_FL_complex	0	917.034	0.051274	0	0	5.54052	0.065337
P0DTC2	96	103	EKSNIIRG			7	916.521	S2_FL_complex	0.167	918.043	0.038942	1.00934	0.064385	5.57228	0.067778
P0DTC2	96	103	EKSNIIRG			7	916.521	S2_FL_complex	1.667	918.575	0.05153	1.54163	0.072693	5.60848	0.010316
P0DTC2	96	103	EKSNIIRG			7	916.521	S2_FL_complex	16.667	919.035	0.075529	2.00166	0.091288	5.57802	0.069205
P0DTC2	96	103	EKSNIIRG			7	916.521	S2_FL_complex	166.667	919.446	0.054862	2.41195	0.075092	5.56773	0.054351
P0DTC2	97	106	KSNIIRGWIF			9	1233.71	S2_3A3Fab_complex	0	1234.41	0.029314	0	0	7.81753	0.02159
P0DTC2	97	106	KSNIIRGWIF			9	1233.71	S2_3A3Fab_complex	0.167	1234.96	0.017546	0.547088	0.034164	7.84689	0.001482
P0DTC2	97	106	KSNIIRGWIF			9	1233.71	S2_3A3Fab_complex	1.667	1235.47	0.044564	1.06203	0.053341	7.83995	0.009202
P0DTC2	97	106	KSNIIRGWIF			9	1233.71	S2_3A3Fab_complex	16.667	1235.98	0.053644	1.56798	0.061131	7.82192	0.016511
P0DTC2	97	106	KSNIIRGWIF			9	1233.71	S2_3A3Fab_complex	166.667	1236.29	0.070685	1.87739	0.076523	7.83908	0.010658
P0DTC2	97	106	KSNIIRGWIF			9	1233.71	S2_Alone	0	1234.41	0.029314	0	0	7.81753	0.02159
P0DTC2	97	106	KSNIIRGWIF			9	1233.71	S2_Alone	0.167	1235	0.072725	0.58426	0.078411	7.81914	0.019259
P0DTC2	97	106	KSNIIRGWIF			9	1233.71	S2_Alone	1.667	1235.48	0.051513	1.06486	0.05927	7.82461	0.023459
P0DTC2	97	106	KSNIIRGWIF			9	1233.71	S2_Alone	16.667	1235.97	0.038002	1.56158	0.047995	7.83595	0.006081
P0DTC2	97	106	KSNIIRGWIF			9	1233.71	S2_Alone	166.667	1236.33	0.046202	1.92218	0.054717	7.81706	0.022918
P0DTC2	97	106	KSNIIRGWIF			9	1233.71	S2_FL_complex	0	1234.41	0.029314	0	0	7.81753	0.02159
P0DTC2	97	106	KSNIIRGWIF			9	1233.71	S2_FL_complex	0.167	1234.98	0.018272	0.571418	0.034543	7.83303	0.020212
P0DTC2	97	106	KSNIIRGWIF			9	1233.71	S2_FL_complex	1.667	1235.45	0.034118	1.03393	0.044982	7.83782	0.01085
P0DTC2	97	106	KSNIIRGWIF			9	1233.71	S2_FL_complex	16.667	1235.98	0.056254	1.56944	0.063434	7.82958	0.019618
P0DTC2	97	106	KSNIIRGWIF			9	1233.71	S2_FL_complex	166.667	1236.34	0.025398	1.92777	0.038787	7.81937	0.009371
P0DTC2	99	106	NIIRGWIF			7	1018.58	S2_3A3Fab_complex	0	1019.21	0.026472	0	0	8.30525	0.009785
P0DTC2	99	106	NIIRGWIF			7	1018.58	S2_3A3Fab_complex	0.167	1019.36	0.014972	0.147507	0.030413	8.30772	0.00332
P0DTC2	99	106	NIIRGWIF			7	1018.58	S2_3A3Fab_complex	1.667	1019.54	0.023758	0.326932	0.03557	8.30134	0.01075
P0DTC2	99	106	NIIRGWIF			7	1018.58	S2_3A3Fab_complex	16.667	1020.03	0.057759	0.820519	0.063536	8.30015	0.006169
P0DTC2	99	106	NIIRGWIF			7	1018.58	S2_3A3Fab_complex	166.667	1020.31	0.081192	1.09805	0.085398	8.30144	0.013799
P0DTC2	99	106	NIIRGWIF			7	1018.58	S2_Alone	0	1019.21	0.026472	0	0	8.30525	0.009785
P0DTC2	99	106	NIIRGWIF			7	1018.58	S2_Alone	0.167	1019.4	0.066302	0.194413	0.071391	8.29733	0.014283
P0DTC2	99	106	NIIRGWIF			7	1018.58	S2_Alone	1.667	1019.51	0.070013	0.297986	0.074851	8.30166	0.008642
P0DTC2	99	106	NIIRGWIF			7	1018.58	S2_Alone	16.667	1020.02	0.035339	0.816565	0.044154	8.30788	0.008384
P0DTC2	99	106	NIIRGWIF			7	1018.58	S2_Alone	166.667	1020.31	0.052853	1.0985	0.059112	8.30544	0.014166
P0DTC2	99	106	NIIRGWIF			7	1018.58	S2_FL_complex	0	1019.21	0.026472	0	0	8.30525	0.009785
P0DTC2	99	106	NIIRGWIF			7	1018.58	S2_FL_complex	0.167	1019.38	0.045428	0.174485	0.052578	8.30375	0.010225
P0DTC2	99	106	NIIRGWIF			7	1018.58	S2_FL_complex	1.667	1019.5	0.031795	0.28945	0.041373	8.29965	0.011302
P0DTC2	99	106	NIIRGWIF			7	1018.58	S2_FL_complex	16.667	1020	0.033452	0.794037	0.042659	8.3035	0.003948
P0DTC2	99	106	NIIRGWIF			7	1018.58	S2_FL_complex	166.667	1020.36	0.025565	1.1485	0.036801	8.28635	0.007747
P0DTC2	104	110	WIFGTTL			6	837.451	S2_3A3Fab_complex	0	838.27	0.042514	0	0	8.66648	0.005689
P0DTC2	104	110	WIFGTTL			6	837.451	S2_3A3Fab_complex	0.167	838.563	0.031778	0.293764	0.053078	8.66629	0.003024
P0DTC2	104	110	WIFGTTL			6	837.451	S2_3A3Fab_complex	1.667	838.76	0.014695	0.490265	0.044982	8.65154	0.016733
P0DTC2	104	110	WIFGTTL			6	837.451	S2_3A3Fab_complex	16.667	839.507	0.07589	1.23733	0.086987	8.65444	0.008883
P0DTC2	104	110	WIFGTTL			6	837.451	S2_3A3Fab_complex	166.667	839.912	0.062595	1.64198	0.075668	8.65014	0.021595
P0DTC2	104	110	WIFGTTL			6	837.451	S2_Alone	0	838.314	0.080106	0	0	8.66634	0.005948
P0DTC2	104	110	WIFGTTL			6	837.451	S2_Alone	0.167	838.556	0.100262	0.241674	0.128334	8.65592	0.021019
P0DTC2	104	110	WIFGTTL			6	837.451	S2_Alone	1.667	838.741	0.149899	0.427312	0.169961	8.65745	0.0133
P0DTC2	104	110	WIFGTTL			6	837.451	S2_Alone	16.667	839.475	0.050407	1.16042	0.094646	8.65967	0.007432
P0DTC2	104	110	WIFGTTL			6	837.451	S2_Alone	166.667	839.935	0.080179	1.62087	0.113339	8.66819	0.009785
P0DTC2	104	110	WIFGTTL			6	837.451	S2_FL_complex	0	838.329	0.084969	0	0	8.66857	0.004788
P0DTC2	104	110	WIFGTTL			6	837.451	S2_FL_complex	0.167	838.632	0.032857	0.302524	0.091101	8.6612	0.014933
P0DTC2	104	110	WIFGTTL			6	837.451	S2_FL_complex	1.667	838.74	0.155338	0.41106	0.177058	8.65045	0.016408
P0DTC2	104	110	WIFGTTL			6	837.451	S2_FL_complex	16.667	839.503	0.036682	1.17386	0.092549	8.66118	0.005545
P0DTC2	104	110	WIFGTTL			6	837.451	S2_FL_complex	166.667	839.946	0.045554	1.61724	0.09641	8.64018	0.015284
P0DTC2	107	117	GTTLDSKTQSL			10	1150.6	S2_3A3Fab_complex	0	1151.14	0.006867	0	0	6.35035	0.046581
P0DTC2	107	117	GTTLDSKTQSL			10	1150.6	S2_3A3Fab_complex	0.167	1151.96	0.048556	0.820494	0.049039	6.41447	0.002362
P0DTC2	107	117	GTTLDSKTQSL			10	1150.6	S2_3A3Fab_complex	1.667	1152.69	0.038732	1.55701	0.039336	6.41372	0.006217
P0DTC2	107	117	GTTLDSKTQSL			10	1150.6	S2_3A3Fab_complex	16.667	1153.42	0.066118	2.28255	0.066474	6.37121	0.05257
P0DTC2	107	117	GTTLDSKTQSL			10	1150.6	S2_3A3Fab_complex	166.667	1153.99	0.046604	2.85274	0.047107	6.41407	0.013569
P0DTC2	107	117	GTTLDSKTQSL			10	1150.6	S2_Alone	0	1151.14	0.006867	0	0	6.35035	0.046581
P0DTC2	107	117	GTTLDSKTQSL			10	1150.6	S2_Alone	0.167	1151.97	0.044071	0.835165	0.044603	6.37153	0.042995
P0DTC2	107	117	GTTLDSKTQSL			10	1150.6	S2_Alone	1.667	1152.7	0.086947	1.56824	0.087218	6.37992	0.06189
P0DTC2	107	117	GTTLDSKTQSL			10	1150.6	S2_Alone	16.667	1153.52	0.120501	2.38391	0.120696	6.41273	0.013999
P0DTC2	107	117	GTTLDSKTQSL			10	1150.6	S2_Alone	166.667	1154.08	0.197121	2.93912	0.19724	6.35108	0.052175
P0DTC2	107	117	GTTLDSKTQSL			10	1150.6	S2_FL_complex	0	1151.14	0.006867	0	0	6.35035	0.046581
P0DTC2	107	117	GTTLDSKTQSL			10	1150.6	S2_FL_complex	0.167	1152.05	0.031697	0.908927	0.032432	6.37355	0.048634
P0DTC2	107	117	GTTLDSKTQSL			10	1150.6	S2_FL_complex	1.667	1152.78	0.087671	1.6474	0.08794	6.38403	0.014426
P0DTC2	107	117	GTTLDSKTQSL			10	1150.6	S2_FL_complex	16.667	1153.42	0.059447	2.28779	0.059842	6.36503	0.053069
P0DTC2	107	117	GTTLDSKTQSL			10	1150.6	S2_FL_complex	166.667	1154.04	0.137838	2.90412	0.138009	6.35069	0.036501
P0DTC2	111	117	DSKTQSL			6	778.394	S2_3A3Fab_complex	0	779.056	0.074277	0	0	5.88808	0.054725
P0DTC2	111	117	DSKTQSL			6	778.394	S2_3A3Fab_complex	0.167	779.363	0.022984	0.306996	0.077752	5.96481	0.004973
P0DTC2	111	117	DSKTQSL			6	778.394	S2_3A3Fab_complex	1.667	779.694	0.032517	0.637459	0.081083	5.96549	0.005438
P0DTC2	111	117	DSKTQSL			6	778.394	S2_3A3Fab_complex	16.667	779.906	0.017961	0.849327	0.076418	5.89678	0.054895
P0DTC2	111	117	DSKTQSL			6	778.394	S2_3A3Fab_complex	166.667	780.051	0.008049	0.994489	0.074712	5.9701	0.015638
P0DTC2	111	117	DSKTQSL			6	778.394	S2_Alone	0	779.081	0.103594	0	0	5.89013	0.055039
P0DTC2	111	117	DSKTQSL			6	778.394	S2_Alone	0.167	779.415	0.058551	0.334079	0.118996	5.91845	0.04778
P0DTC2	111	117	DSKTQSL			6	778.394	S2_Alone	1.667	779.672	0.048455	0.590914	0.114366	5.93463	0.073564
P0DTC2	111	117	DSKTQSL			6	778.394	S2_Alone	16.667	779.883	0.039522	0.802294	0.110877	5.96179	0.017316
P0DTC2	111	117	DSKTQSL			6	778.394	S2_Alone	166.667	780.086	0.074033	1.00551	0.127329	5.88694	0.06611
P0DTC2	111	117	DSKTQSL			6	778.394	S2_FL_complex	0	779.081	0.103594	0	0	5.89013	0.055039
P0DTC2	111	117	DSKTQSL			6	778.394	S2_FL_complex	0.167	779.367	0.035987	0.286273	0.109667	5.93897	0.061726
P0DTC2	111	117	DSKTQSL			6	778.394	S2_FL_complex	1.667	779.657	0.055338	0.576278	0.117448	5.96204	0.017898
P0DTC2	111	117	DSKTQSL			6	778.394	S2_FL_complex	16.667	779.856	0.041783	0.775198	0.111703	5.92701	0.067389
P0DTC2	111	117	DSKTQSL			6	778.394	S2_FL_complex	166.667	780.092	0.035212	1.01116	0.109415	5.9168	0.048368
P0DTC2	111	118	DSKTQSLL			7	891.478	S2_3A3Fab_complex	0	891.973	0.024126	0	0	6.90654	0.038344
P0DTC2	111	118	DSKTQSLL			7	891.478	S2_3A3Fab_complex	0.167	892.417	0.008625	0.443698	0.025622	6.95617	0.002466
P0DTC2	111	118	DSKTQSLL			7	891.478	S2_3A3Fab_complex	1.667	892.791	0.006075	0.817875	0.02488	6.95861	0.008404
P0DTC2	111	118	DSKTQSLL			7	891.478	S2_3A3Fab_complex	16.667	892.946	0.038367	0.972969	0.045322	6.92288	0.041462
P0DTC2	111	118	DSKTQSLL			7	891.478	S2_3A3Fab_complex	166.667	893.075	0.0192	1.10231	0.030834	6.95723	0.010568
P0DTC2	111	118	DSKTQSLL			7	891.478	S2_Alone	0	891.973	0.024126	0	0	6.90654	0.038344
P0DTC2	111	118	DSKTQSLL			7	891.478	S2_Alone	0.167	892.424	0.033761	0.451163	0.041496	6.92473	0.036317
P0DTC2	111	118	DSKTQSLL			7	891.478	S2_Alone	1.667	892.803	0.049248	0.830244	0.05484	6.93195	0.048511
P0DTC2	111	118	DSKTQSLL			7	891.478	S2_Alone	16.667	892.971	0.023716	0.998298	0.033831	6.95708	0.010792
P0DTC2	111	118	DSKTQSLL			7	891.478	S2_Alone	166.667	893.028	0.110175	1.05498	0.112786	6.90724	0.043655
P0DTC2	111	118	DSKTQSLL			7	891.478	S2_FL_complex	0	891.973	0.024126	0	0	6.90654	0.038344
P0DTC2	111	118	DSKTQSLL			7	891.478	S2_FL_complex	0.167	892.403	0.027327	0.43004	0.036454	6.93944	0.041822
P0DTC2	111	118	DSKTQSLL			7	891.478	S2_FL_complex	1.667	892.682	0.0477	0.709252	0.053454	6.95885	0.012845
P0DTC2	111	118	DSKTQSLL			7	891.478	S2_FL_complex	16.667	892.804	0.048796	0.831563	0.054435	6.93853	0.045864
P0DTC2	111	118	DSKTQSLL			7	891.478	S2_FL_complex	166.667	892.96	0.077482	0.986724	0.081151	6.9265	0.031729
P0DTC2	170	176	YVSQPFL			5	853.445	S2_3A3Fab_complex	0	854.042	0.034161	0	0	7.94728	0.018412
P0DTC2	170	176	YVSQPFL			5	853.445	S2_3A3Fab_complex	0.167	855.798	0.07381	1.75609	0.081332	7.96987	0.003076
P0DTC2	170	176	YVSQPFL			5	853.445	S2_3A3Fab_complex	1.667	856.292	0.061468	2.2503	0.070323	7.96795	0.010111
P0DTC2	170	176	YVSQPFL			5	853.445	S2_3A3Fab_complex	16.667	856.216	0.078448	2.17429	0.085563	7.95336	0.016908
P0DTC2	170	176	YVSQPFL			5	853.445	S2_3A3Fab_complex	166.667	856.271	0.060285	2.22887	0.069291	7.96396	0.013269
P0DTC2	170	176	YVSQPFL			5	853.445	S2_Alone	0	854.042	0.034161	0	0	7.94728	0.018412
P0DTC2	170	176	YVSQPFL			5	853.445	S2_Alone	0.167	855.799	0.067338	1.75685	0.075508	7.94937	0.019017
P0DTC2	170	176	YVSQPFL			5	853.445	S2_Alone	1.667	856.327	0.038687	2.28486	0.051611	7.95356	0.021959
P0DTC2	170	176	YVSQPFL			5	853.445	S2_Alone	16.667	856.227	0.046823	2.18472	0.05796	7.96284	0.007547
P0DTC2	170	176	YVSQPFL			5	853.445	S2_Alone	166.667	856.241	0.056076	2.19904	0.065662	7.9404	0.020563
P0DTC2	170	176	YVSQPFL			5	853.445	S2_FL_complex	0	854.042	0.034161	0	0	7.94728	0.018412
P0DTC2	170	176	YVSQPFL			5	853.445	S2_FL_complex	0.167	855.802	0.030617	1.75959	0.045873	7.95847	0.017964
P0DTC2	170	176	YVSQPFL			5	853.445	S2_FL_complex	1.667	856.34	0.065484	2.29761	0.073859	7.96402	0.00904
P0DTC2	170	176	YVSQPFL			5	853.445	S2_FL_complex	16.667	856.255	0.082213	2.21297	0.089028	7.95278	0.022052
P0DTC2	170	176	YVSQPFL			5	853.445	S2_FL_complex	166.667	856.243	0.075503	2.20056	0.082871	7.945	0.011911
P0DTC2	177	186	MDLEGKQGNF			9	1138.52	S2_3A3Fab_complex	0	1139.11	0.042504	0	0	6.89429	0.039475
P0DTC2	177	186	MDLEGKQGNF			9	1138.52	S2_3A3Fab_complex	0.167	1143.39	0.048089	4.27549	0.064181	6.93037	0.003551
P0DTC2	177	186	MDLEGKQGNF			9	1138.52	S2_3A3Fab_complex	1.667	1143.27	0.100968	4.15829	0.10955	6.93276	0.009042
P0DTC2	177	186	MDLEGKQGNF			9	1138.52	S2_3A3Fab_complex	16.667	1143.3	0.12566	4.18872	0.132654	6.90821	0.038332
P0DTC2	177	186	MDLEGKQGNF			9	1138.52	S2_3A3Fab_complex	166.667	1143.33	0.04567	4.21566	0.062389	6.92959	0.009564
P0DTC2	177	186	MDLEGKQGNF			9	1138.52	S2_Alone	0	1139.11	0.042504	0	0	6.89429	0.039475
P0DTC2	177	186	MDLEGKQGNF			9	1138.52	S2_Alone	0.167	1143.39	0.131659	4.27637	0.13835	6.91104	0.033286
P0DTC2	177	186	MDLEGKQGNF			9	1138.52	S2_Alone	1.667	1143.34	0.100028	4.23234	0.108684	6.92261	0.044219
P0DTC2	177	186	MDLEGKQGNF			9	1138.52	S2_Alone	16.667	1143.29	0.064555	4.17795	0.077292	6.93593	0.012258
P0DTC2	177	186	MDLEGKQGNF			9	1138.52	S2_Alone	166.667	1143.37	0.077984	4.26195	0.088815	6.89865	0.04629
P0DTC2	177	186	MDLEGKQGNF			9	1138.52	S2_FL_complex	0	1139.11	0.042504	0	0	6.89429	0.039475
P0DTC2	177	186	MDLEGKQGNF			9	1138.52	S2_FL_complex	0.167	1143.33	0.104484	4.21786	0.112799	6.91069	0.042547
P0DTC2	177	186	MDLEGKQGNF			9	1138.52	S2_FL_complex	1.667	1143.27	0.129323	4.16307	0.136129	6.92802	0.017831
P0DTC2	177	186	MDLEGKQGNF			9	1138.52	S2_FL_complex	16.667	1143.31	0.081833	4.20378	0.092213	6.91012	0.039823
P0DTC2	177	186	MDLEGKQGNF			9	1138.52	S2_FL_complex	166.667	1143.39	0.117084	4.28337	0.12456	6.89599	0.02685
P0DTC2	177	191	MDLEGKQGNFKNLRE			14	1778.89	S2_3A3Fab_complex	0	1780.35	0.084442	0	0	6.39455	0.02987
P0DTC2	177	191	MDLEGKQGNFKNLRE			14	1778.89	S2_3A3Fab_complex	0.167	1785.01	0.050886	4.66108	0.098589	6.45787	0.00309
P0DTC2	177	191	MDLEGKQGNFKNLRE			14	1778.89	S2_3A3Fab_complex	1.667	1785.45	0.112737	5.10157	0.140855	6.4616	0.0053
P0DTC2	177	191	MDLEGKQGNFKNLRE			14	1778.89	S2_3A3Fab_complex	16.667	1786.22	0.130444	5.87461	0.15539	6.41901	0.050442
P0DTC2	177	191	MDLEGKQGNFKNLRE			14	1778.89	S2_3A3Fab_complex	166.667	1786.72	0.036608	6.37083	0.092036	6.46134	0.010412
P0DTC2	177	191	MDLEGKQGNFKNLRE			14	1778.89	S2_Alone	0	1780.35	0.084442	0	0	6.39455	0.02987
P0DTC2	177	191	MDLEGKQGNFKNLRE			14	1778.89	S2_Alone	0.167	1785.03	0.134349	4.68435	0.158682	6.41936	0.043065
P0DTC2	177	191	MDLEGKQGNFKNLRE			14	1778.89	S2_Alone	1.667	1785.31	0.093406	4.96229	0.125917	6.43369	0.056971
P0DTC2	177	191	MDLEGKQGNFKNLRE			14	1778.89	S2_Alone	16.667	1786.15	0.108666	5.80084	0.137618	6.45744	0.010707
P0DTC2	177	191	MDLEGKQGNFKNLRE			14	1778.89	S2_Alone	166.667	1786.88	0.152097	6.53578	0.173965	6.39867	0.052377
P0DTC2	177	191	MDLEGKQGNFKNLRE			14	1778.89	S2_FL_complex	0	1780.47	0.132726	0	0	6.41444	0.041482
P0DTC2	177	191	MDLEGKQGNFKNLRE			14	1778.89	S2_FL_complex	0.167	1784.88	0.044375	4.40867	0.139947	6.43751	0.047484
P0DTC2	177	191	MDLEGKQGNFKNLRE			14	1778.89	S2_FL_complex	1.667	1785.32	0.204547	4.85343	0.243835	6.45385	0.017228
P0DTC2	177	191	MDLEGKQGNFKNLRE			14	1778.89	S2_FL_complex	16.667	1786.15	0.076629	5.68235	0.153258	6.43199	0.052482
P0DTC2	177	191	MDLEGKQGNFKNLRE			14	1778.89	S2_FL_complex	166.667	1786.86	0.170328	6.39185	0.215935	6.41566	0.038604
P0DTC2	179	191	LEGKQGNFKNLRE			12	1532.82	S2_3A3Fab_complex	0	1533.7	0.046401	0	0	5.87341	0.054739
P0DTC2	179	191	LEGKQGNFKNLRE			12	1532.82	S2_3A3Fab_complex	0.167	1537.49	0.110004	3.79091	0.11939	5.96178	0.005686
P0DTC2	179	191	LEGKQGNFKNLRE			12	1532.82	S2_3A3Fab_complex	1.667	1537.72	0.100109	4.02164	0.11034	5.95879	0.007294
P0DTC2	179	191	LEGKQGNFKNLRE			12	1532.82	S2_3A3Fab_complex	16.667	1538.38	0.052883	4.68356	0.070353	5.90706	0.059106
P0DTC2	179	191	LEGKQGNFKNLRE			12	1532.82	S2_3A3Fab_complex	166.667	1539.08	0.096871	5.3796	0.107411	5.95999	0.016741
P0DTC2	179	191	LEGKQGNFKNLRE			12	1532.82	S2_Alone	0	1533.7	0.046401	0	0	5.87341	0.054739
P0DTC2	179	191	LEGKQGNFKNLRE			12	1532.82	S2_Alone	0.167	1537.5	0.184776	3.80317	0.190513	5.91514	0.049734
P0DTC2	179	191	LEGKQGNFKNLRE			12	1532.82	S2_Alone	1.667	1537.81	0.132785	4.11124	0.140659	5.92515	0.069251
P0DTC2	179	191	LEGKQGNFKNLRE			12	1532.82	S2_Alone	16.667	1538.4	0.104338	4.69795	0.11419	5.95578	0.020042
P0DTC2	179	191	LEGKQGNFKNLRE			12	1532.82	S2_Alone	166.667	1539.21	0.052359	5.50711	0.069961	5.88659	0.064568
P0DTC2	179	191	LEGKQGNFKNLRE			12	1532.82	S2_FL_complex	0	1533.7	0.046401	0	0	5.87341	0.054739
P0DTC2	179	191	LEGKQGNFKNLRE			12	1532.82	S2_FL_complex	0.167	1537.36	0.084341	3.6599	0.096263	5.94398	0.056621
P0DTC2	179	191	LEGKQGNFKNLRE			12	1532.82	S2_FL_complex	1.667	1537.74	0.034397	4.04523	0.05776	5.96765	0.020563
P0DTC2	179	191	LEGKQGNFKNLRE			12	1532.82	S2_FL_complex	16.667	1538.27	0.082946	4.57265	0.095042	5.92422	0.065165
P0DTC2	179	191	LEGKQGNFKNLRE			12	1532.82	S2_FL_complex	166.667	1539.07	0.127577	5.36788	0.135753	5.9206	0.046374
P0DTC2	180	191	EGKQGNFKNLRE			11	1419.73	S2_3A3Fab_complex	0	1420.49	0.051659	0	0	6.40071	0.046496
P0DTC2	180	191	EGKQGNFKNLRE			11	1419.73	S2_3A3Fab_complex	0.167	1424.61	0.033023	4.12042	0.061312	6.46306	0.002824
P0DTC2	180	191	EGKQGNFKNLRE			11	1419.73	S2_3A3Fab_complex	1.667	1424.77	0.062512	4.28228	0.081095	6.46534	0.007173
P0DTC2	180	191	EGKQGNFKNLRE			11	1419.73	S2_3A3Fab_complex	16.667	1425.34	0.11571	4.85653	0.126718	6.426	0.051041
P0DTC2	180	191	EGKQGNFKNLRE			11	1419.73	S2_3A3Fab_complex	166.667	1425.86	0.135413	5.36991	0.144932	6.46511	0.012348
P0DTC2	180	191	EGKQGNFKNLRE			11	1419.73	S2_Alone	0	1420.49	0.051659	0	0	6.40071	0.046496
P0DTC2	180	191	EGKQGNFKNLRE			11	1419.73	S2_Alone	0.167	1424.62	0.065871	4.13225	0.083712	6.42263	0.041952
P0DTC2	180	191	EGKQGNFKNLRE			11	1419.73	S2_Alone	1.667	1424.64	0.129891	4.15033	0.139787	6.43063	0.059106
P0DTC2	180	191	EGKQGNFKNLRE			11	1419.73	S2_Alone	16.667	1425.4	0.122441	4.91068	0.132892	6.45985	0.012381
P0DTC2	180	191	EGKQGNFKNLRE			11	1419.73	S2_Alone	166.667	1425.98	0.193569	5.49482	0.200343	6.40245	0.05285
P0DTC2	180	191	EGKQGNFKNLRE			11	1419.73	S2_FL_complex	0	1420.49	0.051659	0	0	6.40071	0.046496
P0DTC2	180	191	EGKQGNFKNLRE			11	1419.73	S2_FL_complex	0.167	1424.53	0.131853	4.04462	0.141612	6.42674	0.052334
P0DTC2	180	191	EGKQGNFKNLRE			11	1419.73	S2_FL_complex	1.667	1424.7	0.137893	4.21036	0.147252	6.4532	0.01667
P0DTC2	180	191	EGKQGNFKNLRE			11	1419.73	S2_FL_complex	16.667	1425.38	0.103989	4.89638	0.116114	6.42816	0.056739
P0DTC2	180	191	EGKQGNFKNLRE			11	1419.73	S2_FL_complex	166.667	1425.92	0.16041	5.43758	0.168523	6.42218	0.037552
P0DTC2	181	191	GKQGNFKNLRE			10	1290.69	S2_3A3Fab_complex	0	1291.51	0.058404	0	0	5.74266	0.05939
P0DTC2	181	191	GKQGNFKNLRE			10	1290.69	S2_3A3Fab_complex	0.167	1293.81	0.063168	2.29552	0.08603	5.81644	0.002093
P0DTC2	181	191	GKQGNFKNLRE			10	1290.69	S2_3A3Fab_complex	1.667	1294.26	0.147012	2.74293	0.158188	5.81979	0.002776
P0DTC2	181	191	GKQGNFKNLRE			10	1290.69	S2_3A3Fab_complex	16.667	1295.04	0.089665	3.52393	0.107009	5.77382	0.054553
P0DTC2	181	191	GKQGNFKNLRE			10	1290.69	S2_3A3Fab_complex	166.667	1295.6	0.043887	4.0865	0.073055	5.80202	0.001385
P0DTC2	181	191	GKQGNFKNLRE			10	1290.69	S2_Alone	0	1291.51	0.058404	0	0	5.74266	0.05939
P0DTC2	181	191	GKQGNFKNLRE			10	1290.69	S2_Alone	0.167	1293.86	0.091144	2.34558	0.10825	5.77776	0.05187
P0DTC2	181	191	GKQGNFKNLRE			10	1290.69	S2_Alone	1.667	1294.22	0.166825	2.70734	0.176753	5.76224	0.070452
P0DTC2	181	191	GKQGNFKNLRE			10	1290.69	S2_Alone	16.667	1295.04	0.072642	3.52619	0.093208	5.80112	0.00886
P0DTC2	181	191	GKQGNFKNLRE			10	1290.69	S2_Alone	166.667	1295.68	0.070557	4.16814	0.091593	5.72781	0.056671
P0DTC2	181	191	GKQGNFKNLRE			10	1290.69	S2_FL_complex	0	1291.51	0.058404	0	0	5.74266	0.05939
P0DTC2	181	191	GKQGNFKNLRE			10	1290.69	S2_FL_complex	0.167	1293.72	0.051385	2.21015	0.077791	5.76112	0.055936
P0DTC2	181	191	GKQGNFKNLRE			10	1290.69	S2_FL_complex	1.667	1294.18	0.072141	2.6641	0.092818	5.81393	0.014518
P0DTC2	181	191	GKQGNFKNLRE			10	1290.69	S2_FL_complex	16.667	1294.96	0.110042	3.44499	0.12458	5.76043	0.067203
P0DTC2	181	191	GKQGNFKNLRE			10	1290.69	S2_FL_complex	166.667	1295.62	0.086041	4.11005	0.103991	5.78025	0.045313
P0DTC2	192	199	FVFKNIDG			7	939.493	S2_3A3Fab_complex	0	940.061	0.01593	0	0	7.13189	0.034123
P0DTC2	192	199	FVFKNIDG			7	939.493	S2_3A3Fab_complex	0.167	941.098	0.001808	1.03711	0.016032	7.17101	0.002538
P0DTC2	192	199	FVFKNIDG			7	939.493	S2_3A3Fab_complex	1.667	941.679	0.016263	1.61789	0.022765	7.16919	0.0109
P0DTC2	192	199	FVFKNIDG			7	939.493	S2_3A3Fab_complex	16.667	942.236	0.07079	2.17524	0.07256	7.14594	0.034981
P0DTC2	192	199	FVFKNIDG			7	939.493	S2_3A3Fab_complex	166.667	942.193	0.039959	2.13211	0.043018	7.1645	0.003609
P0DTC2	192	199	FVFKNIDG			7	939.493	S2_Alone	0	940.061	0.01593	0	0	7.13189	0.034123
P0DTC2	192	199	FVFKNIDG			7	939.493	S2_Alone	0.167	941.13	0.072414	1.06897	0.074146	7.14811	0.028588
P0DTC2	192	199	FVFKNIDG			7	939.493	S2_Alone	1.667	941.648	0.002168	1.5877	0.016077	7.12476	0.032377
P0DTC2	192	199	FVFKNIDG			7	939.493	S2_Alone	16.667	942.182	0.052219	2.12149	0.054595	7.17284	0.013239
P0DTC2	192	199	FVFKNIDG			7	939.493	S2_Alone	166.667	942.256	0.073405	2.19477	0.075113	7.13706	0.037984
P0DTC2	192	199	FVFKNIDG			7	939.493	S2_FL_complex	0	940.061	0.01593	0	0	7.13189	0.034123
P0DTC2	192	199	FVFKNIDG			7	939.493	S2_FL_complex	0.167	941.098	0.091814	1.03748	0.093186	7.15798	0.034329
P0DTC2	192	199	FVFKNIDG			7	939.493	S2_FL_complex	1.667	941.616	0.005857	1.55549	0.016973	7.17136	0.020879
P0DTC2	192	199	FVFKNIDG			7	939.493	S2_FL_complex	16.667	942.171	0.020086	2.11062	0.025636	7.12915	0.039231
P0DTC2	192	199	FVFKNIDG			7	939.493	S2_FL_complex	166.667	942.169	0.088874	2.10832	0.090291	7.14592	0.025124
P0DTC2	192	200	FVFKNIDGY			8	1102.56	S2_3A3Fab_complex	0	1103.48	0.10514	0	0	7.48001	0.023912
P0DTC2	192	200	FVFKNIDGY			8	1102.56	S2_3A3Fab_complex	0.167	1104.64	0.061888	1.15746	0.122003	7.51171	0.001351
P0DTC2	192	200	FVFKNIDGY			8	1102.56	S2_3A3Fab_complex	1.667	1105.14	0.062557	1.65188	0.122343	7.507	0.010918
P0DTC2	192	200	FVFKNIDGY			8	1102.56	S2_3A3Fab_complex	16.667	1105.63	0.039006	2.14707	0.112143	7.48771	0.023779
P0DTC2	192	200	FVFKNIDGY			8	1102.56	S2_3A3Fab_complex	166.667	1106.07	0.050026	2.58311	0.116435	7.50834	0.013284
P0DTC2	192	200	FVFKNIDGY			8	1102.56	S2_Alone	0	1103.44	0.035196	0	0	7.47995	0.024085
P0DTC2	192	200	FVFKNIDGY			8	1102.56	S2_Alone	0.167	1104.65	0.044871	1.211	0.057028	7.48636	0.022145
P0DTC2	192	200	FVFKNIDGY			8	1102.56	S2_Alone	1.667	1105.1	0.071401	1.66447	0.079604	7.49473	0.029869
P0DTC2	192	200	FVFKNIDGY			8	1102.56	S2_Alone	16.667	1105.64	0.077163	2.20045	0.084811	7.50786	0.010609
P0DTC2	192	200	FVFKNIDGY			8	1102.56	S2_Alone	166.667	1105.99	0.089582	2.55693	0.096248	7.48162	0.028658
P0DTC2	192	200	FVFKNIDGY			8	1102.56	S2_FL_complex	0	1103.44	0.035196	0	0	7.47995	0.024085
P0DTC2	192	200	FVFKNIDGY			8	1102.56	S2_FL_complex	0.167	1104.58	0.029611	1.14581	0.045995	7.49881	0.025826
P0DTC2	192	200	FVFKNIDGY			8	1102.56	S2_FL_complex	1.667	1105.06	0.042201	1.61893	0.054952	7.50518	0.014312
P0DTC2	192	200	FVFKNIDGY			8	1102.56	S2_FL_complex	16.667	1105.59	0.041166	2.15084	0.054161	7.49328	0.026639
P0DTC2	192	200	FVFKNIDGY			8	1102.56	S2_FL_complex	166.667	1106.05	0.058634	2.60839	0.068387	7.48403	0.014147
P0DTC2	192	201	FVFKNIDGYF			9	1249.63	S2_3A3Fab_complex	0	1250.43	0.037229	0	0	8.02993	0.021529
P0DTC2	192	201	FVFKNIDGYF			9	1249.63	S2_3A3Fab_complex	0.167	1251.66	0.016335	1.23029	0.040655	8.05173	0.00226
P0DTC2	192	201	FVFKNIDGYF			9	1249.63	S2_3A3Fab_complex	1.667	1252.3	0.060029	1.87048	0.070636	8.03964	0.01189
P0DTC2	192	201	FVFKNIDGYF			9	1249.63	S2_3A3Fab_complex	16.667	1252.85	0.091813	2.42189	0.099074	8.02962	0.014127
P0DTC2	192	201	FVFKNIDGYF			9	1249.63	S2_3A3Fab_complex	166.667	1253.24	0.099682	2.80424	0.106407	8.03932	0.015141
P0DTC2	192	201	FVFKNIDGYF			9	1249.63	S2_Alone	0	1250.43	0.037229	0	0	8.02993	0.021529
P0DTC2	192	201	FVFKNIDGYF			9	1249.63	S2_Alone	0.167	1251.73	0.095896	1.29815	0.102869	8.02406	0.020171
P0DTC2	192	201	FVFKNIDGYF			9	1249.63	S2_Alone	1.667	1252.25	0.118896	1.81646	0.124588	8.03283	0.019895
P0DTC2	192	201	FVFKNIDGYF			9	1249.63	S2_Alone	16.667	1252.83	0.071628	2.40287	0.080725	8.04594	0.008646
P0DTC2	192	201	FVFKNIDGYF			9	1249.63	S2_Alone	166.667	1253.27	0.111265	2.83408	0.117329	8.03018	0.023381
P0DTC2	192	201	FVFKNIDGYF			9	1249.63	S2_FL_complex	0	1250.43	0.037229	0	0	8.02993	0.021529
P0DTC2	192	201	FVFKNIDGYF			9	1249.63	S2_FL_complex	0.167	1251.71	0.016826	1.2826	0.040855	8.04033	0.017593
P0DTC2	192	201	FVFKNIDGYF			9	1249.63	S2_FL_complex	1.667	1252.25	0.04409	1.81562	0.057705	8.04028	0.013602
P0DTC2	192	201	FVFKNIDGYF			9	1249.63	S2_FL_complex	16.667	1252.85	0.040638	2.41735	0.055113	8.03679	0.017754
P0DTC2	192	201	FVFKNIDGYF			9	1249.63	S2_FL_complex	166.667	1253.31	0.039107	2.88083	0.053994	8.01762	0.002813
P0DTC2	193	201	VFKNIDGYF			8	1102.56	S2_3A3Fab_complex	0	1103.04	0.092492	0	0	8.03553	0.019982
P0DTC2	193	201	VFKNIDGYF			8	1102.56	S2_3A3Fab_complex	0.167	1104.32	0.042641	1.27854	0.101848	8.05387	0.0023
P0DTC2	193	201	VFKNIDGYF			8	1102.56	S2_3A3Fab_complex	1.667	1104.89	0.084043	1.84829	0.124972	8.04412	0.010935
P0DTC2	193	201	VFKNIDGYF			8	1102.56	S2_3A3Fab_complex	16.667	1105.38	0.098418	2.34653	0.135059	8.0347	0.013347
P0DTC2	193	201	VFKNIDGYF			8	1102.56	S2_3A3Fab_complex	166.667	1105.8	0.116546	2.76431	0.148787	8.04434	0.015017
P0DTC2	193	201	VFKNIDGYF			8	1102.56	S2_Alone	0	1103.04	0.092492	0	0	8.03553	0.019982
P0DTC2	193	201	VFKNIDGYF			8	1102.56	S2_Alone	0.167	1104.37	0.088191	1.33108	0.127799	8.03357	0.020024
P0DTC2	193	201	VFKNIDGYF			8	1102.56	S2_Alone	1.667	1104.83	0.115308	1.78727	0.14782	8.03849	0.019668
P0DTC2	193	201	VFKNIDGYF			8	1102.56	S2_Alone	16.667	1105.38	0.072002	2.3385	0.117214	8.04762	0.007753
P0DTC2	193	201	VFKNIDGYF			8	1102.56	S2_Alone	166.667	1105.82	0.099077	2.78352	0.13554	8.0354	0.021892
P0DTC2	193	201	VFKNIDGYF			8	1102.56	S2_FL_complex	0	1103.04	0.092492	0	0	8.03553	0.019982
P0DTC2	193	201	VFKNIDGYF			8	1102.56	S2_FL_complex	0.167	1104.37	0.018792	1.33639	0.094382	8.04319	0.017095
P0DTC2	193	201	VFKNIDGYF			8	1102.56	S2_FL_complex	1.667	1104.86	0.051369	1.81807	0.1058	8.04582	0.01603
P0DTC2	193	201	VFKNIDGYF			8	1102.56	S2_FL_complex	16.667	1105.38	0.023095	2.33793	0.095332	8.04234	0.017199
P0DTC2	193	201	VFKNIDGYF			8	1102.56	S2_FL_complex	166.667	1105.85	0.069208	2.8142	0.115518	8.02653	0.0091
P0DTC2	194	200	FKNIDGY			6	856.42	S2_3A3Fab_complex	0	856.845	0.020296	0	0	7.4856	0.023885
P0DTC2	194	200	FKNIDGY			6	856.42	S2_3A3Fab_complex	0.167	857.962	0.00451	1.11701	0.020791	7.51274	0.002838
P0DTC2	194	200	FKNIDGY			6	856.42	S2_3A3Fab_complex	1.667	858.426	0.023581	1.58033	0.031112	7.51401	0.002789
P0DTC2	194	200	FKNIDGY			6	856.42	S2_3A3Fab_complex	16.667	858.855	0	2.00954	0.020296	7.51768	0
P0DTC2	194	200	FKNIDGY			6	856.42	S2_3A3Fab_complex	166.667	859.228	0.074952	2.38289	0.077651	7.51093	0.013408
P0DTC2	194	200	FKNIDGY			6	856.42	S2_Alone	0	856.845	0.020296	0	0	7.4856	0.023885
P0DTC2	194	200	FKNIDGY			6	856.42	S2_Alone	0.167	858.01	0.0632	1.16438	0.066379	7.50661	0.011306
P0DTC2	194	200	FKNIDGY			6	856.42	S2_Alone	1.667	858.411	0.057032	1.56532	0.060535	7.49967	0.030564
P0DTC2	194	200	FKNIDGY			6	856.42	S2_Alone	16.667	858.891	0.049386	2.04592	0.053394	7.51063	0.011103
P0DTC2	194	200	FKNIDGY			6	856.42	S2_Alone	166.667	859.282	0.073971	2.43646	0.076705	7.48497	0.029229
P0DTC2	194	200	FKNIDGY			6	856.42	S2_FL_complex	0	856.845	0.020296	0	0	7.4856	0.023885
P0DTC2	194	200	FKNIDGY			6	856.42	S2_FL_complex	0.167	857.939	0.053918	1.09365	0.057611	7.50088	0.025567
P0DTC2	194	200	FKNIDGY			6	856.42	S2_FL_complex	1.667	858.445	0.045193	1.59969	0.049541	7.51226	0.008319
P0DTC2	194	200	FKNIDGY			6	856.42	S2_FL_complex	16.667	858.902	0.060674	2.05672	0.063978	7.49759	0.028633
P0DTC2	194	200	FKNIDGY			6	856.42	S2_FL_complex	166.667	859.314	0.038391	2.46835	0.043426	7.47393	0.010536
P0DTC2	194	201	FKNIDGYF			7	1003.49	S2_3A3Fab_complex	0	1004.06	0.011124	0	0	8.03408	0.020598
P0DTC2	194	201	FKNIDGYF			7	1003.49	S2_3A3Fab_complex	0.167	1005.17	0.017681	1.10902	0.020889	8.0586	0.001791
P0DTC2	194	201	FKNIDGYF			7	1003.49	S2_3A3Fab_complex	1.667	1005.74	0.055128	1.67296	0.056239	8.04797	0.012499
P0DTC2	194	201	FKNIDGYF			7	1003.49	S2_3A3Fab_complex	16.667	1006.23	0.08179	2.16769	0.082543	8.03862	0.014562
P0DTC2	194	201	FKNIDGYF			7	1003.49	S2_3A3Fab_complex	166.667	1006.56	0.079411	2.49365	0.080186	8.04984	0.015084
P0DTC2	194	201	FKNIDGYF			7	1003.49	S2_Alone	0	1004.06	0.011124	0	0	8.03408	0.020598
P0DTC2	194	201	FKNIDGYF			7	1003.49	S2_Alone	0.167	1005.21	0.090577	1.1459	0.091257	8.03361	0.01953
P0DTC2	194	201	FKNIDGYF			7	1003.49	S2_Alone	1.667	1005.67	0.109462	1.60359	0.110026	8.03916	0.019806
P0DTC2	194	201	FKNIDGYF			7	1003.49	S2_Alone	16.667	1006.2	0.071773	2.13338	0.07263	8.04939	0.008221
P0DTC2	194	201	FKNIDGYF			7	1003.49	S2_Alone	166.667	1006.57	0.102156	2.50187	0.10276	8.0346	0.021824
P0DTC2	194	201	FKNIDGYF			7	1003.49	S2_FL_complex	0	1004.06	0.011124	0	0	8.03408	0.020598
P0DTC2	194	201	FKNIDGYF			7	1003.49	S2_FL_complex	0.167	1005.23	0.034946	1.17052	0.036674	8.04573	0.017362
P0DTC2	194	201	FKNIDGYF			7	1003.49	S2_FL_complex	1.667	1005.72	0.03417	1.65647	0.035935	8.05253	0.003394
P0DTC2	194	201	FKNIDGYF			7	1003.49	S2_FL_complex	16.667	1006.28	0.051423	2.21113	0.052612	8.04182	0.017099
P0DTC2	194	201	FKNIDGYF			7	1003.49	S2_FL_complex	166.667	1006.61	0.062285	2.54178	0.063271	8.02772	0.008934
P0DTC2	195	201	KNIDGYF			6	856.42	S2_3A3Fab_complex	0	856.835	0.010161	0	0	7.28811	0.030706
P0DTC2	195	201	KNIDGYF			6	856.42	S2_3A3Fab_complex	0.167	857.98	0.071402	1.14462	0.072121	7.32144	0.003016
P0DTC2	195	201	KNIDGYF			6	856.42	S2_3A3Fab_complex	1.667	858.347	0.089455	1.51225	0.09003	7.31548	0.006623
P0DTC2	195	201	KNIDGYF			6	856.42	S2_3A3Fab_complex	16.667	858.805	0.062574	1.96935	0.063393	7.29378	0.031187
P0DTC2	195	201	KNIDGYF			6	856.42	S2_3A3Fab_complex	166.667	859.174	0.063043	2.33835	0.063856	7.31953	0.013109
P0DTC2	195	201	KNIDGYF			6	856.42	S2_Alone	0	856.835	0.010161	0	0	7.28811	0.030706
P0DTC2	195	201	KNIDGYF			6	856.42	S2_Alone	0.167	858.063	0.020404	1.22784	0.022794	7.29606	0.028175
P0DTC2	195	201	KNIDGYF			6	856.42	S2_Alone	1.667	858.346	0.044839	1.51096	0.045976	7.30266	0.038438
P0DTC2	195	201	KNIDGYF			6	856.42	S2_Alone	16.667	858.838	0.048068	2.00276	0.04913	7.32049	0.009759
P0DTC2	195	201	KNIDGYF			6	856.42	S2_Alone	166.667	859.231	0.056665	2.39561	0.057569	7.2877	0.036101
P0DTC2	195	201	KNIDGYF			6	856.42	S2_FL_complex	0	856.835	0.010161	0	0	7.28811	0.030706
P0DTC2	195	201	KNIDGYF			6	856.42	S2_FL_complex	0.167	858.022	0.089535	1.1867	0.09011	7.30817	0.03116
P0DTC2	195	201	KNIDGYF			6	856.42	S2_FL_complex	1.667	858.319	0.090607	1.48395	0.091175	7.31789	0.015188
P0DTC2	195	201	KNIDGYF			6	856.42	S2_FL_complex	16.667	858.894	0.019996	2.05906	0.022429	7.30097	0.035824
P0DTC2	195	201	KNIDGYF			6	856.42	S2_FL_complex	166.667	859.166	0.038293	2.33075	0.039618	7.29108	0.019734
P0DTC2	200	212	YFKIYSKHTPINL			11	1623.89	S2_3A3Fab_complex	0	1624.86	0.019039	0	0	6.88073	0.037235
P0DTC2	200	212	YFKIYSKHTPINL			11	1623.89	S2_3A3Fab_complex	0.167	1626.25	0.012574	1.39546	0.022816	6.92285	0.003058
P0DTC2	200	212	YFKIYSKHTPINL			11	1623.89	S2_3A3Fab_complex	1.667	1626.91	0.063822	2.05151	0.066601	6.92087	0.010298
P0DTC2	200	212	YFKIYSKHTPINL			11	1623.89	S2_3A3Fab_complex	16.667	1627.08	0.095638	2.21984	0.097515	6.88984	0.039044
P0DTC2	200	212	YFKIYSKHTPINL			11	1623.89	S2_3A3Fab_complex	166.667	1627.13	0.074831	2.27237	0.077215	6.91962	0.012688
P0DTC2	200	212	YFKIYSKHTPINL			11	1623.89	S2_Alone	0	1624.86	0.019039	0	0	6.88073	0.037235
P0DTC2	200	212	YFKIYSKHTPINL			11	1623.89	S2_Alone	0.167	1626.32	0.042755	1.46046	0.046802	6.89168	0.036834
P0DTC2	200	212	YFKIYSKHTPINL			11	1623.89	S2_Alone	1.667	1626.86	0.060069	2.00865	0.063014	6.90085	0.046659
P0DTC2	200	212	YFKIYSKHTPINL			11	1623.89	S2_Alone	16.667	1627.09	0.04977	2.23022	0.053287	6.9251	0.010307
P0DTC2	200	212	YFKIYSKHTPINL			11	1623.89	S2_Alone	166.667	1627.2	0.082754	2.34337	0.084915	6.87802	0.044482
P0DTC2	200	212	YFKIYSKHTPINL			11	1623.89	S2_FL_complex	0	1624.86	0.019039	0	0	6.88073	0.037235
P0DTC2	200	212	YFKIYSKHTPINL			11	1623.89	S2_FL_complex	0.167	1626.23	0.077283	1.37563	0.079594	6.90419	0.038358
P0DTC2	200	212	YFKIYSKHTPINL			11	1623.89	S2_FL_complex	1.667	1626.84	0.03893	1.97948	0.043337	6.91633	0.014666
P0DTC2	200	212	YFKIYSKHTPINL			11	1623.89	S2_FL_complex	16.667	1627.05	0.016429	2.19845	0.025147	6.9011	0.0421
P0DTC2	200	212	YFKIYSKHTPINL			11	1623.89	S2_FL_complex	166.667	1627.14	0.054974	2.27894	0.058178	6.88741	0.024211
P0DTC2	201	212	FKIYSKHTPINL			10	1460.83	S2_3A3Fab_complex	0	1461.77	0.030624	0	0	6.68567	0.042554
P0DTC2	201	212	FKIYSKHTPINL			10	1460.83	S2_3A3Fab_complex	0.167	1463.11	0.012616	1.33672	0.033121	6.73845	0.000595
P0DTC2	201	212	FKIYSKHTPINL			10	1460.83	S2_3A3Fab_complex	1.667	1463.74	0.021627	1.97218	0.037491	6.73872	0.00918
P0DTC2	201	212	FKIYSKHTPINL			10	1460.83	S2_3A3Fab_complex	16.667	1463.93	0.029565	2.16257	0.042567	6.70027	0.042387
P0DTC2	201	212	FKIYSKHTPINL			10	1460.83	S2_3A3Fab_complex	166.667	1463.91	0.042368	2.13871	0.052277	6.7371	0.012438
P0DTC2	201	212	FKIYSKHTPINL			10	1460.83	S2_Alone	0	1461.77	0.030624	0	0	6.68567	0.042554
P0DTC2	201	212	FKIYSKHTPINL			10	1460.83	S2_Alone	0.167	1463.14	0.039887	1.37155	0.050287	6.70424	0.039965
P0DTC2	201	212	FKIYSKHTPINL			10	1460.83	S2_Alone	1.667	1463.72	0.069808	1.94862	0.076229	6.71381	0.051766
P0DTC2	201	212	FKIYSKHTPINL			10	1460.83	S2_Alone	16.667	1463.91	0.03742	2.14281	0.048353	6.74325	0.010191
P0DTC2	201	212	FKIYSKHTPINL			10	1460.83	S2_Alone	166.667	1464.02	0.062682	2.25061	0.069762	6.68915	0.044523
P0DTC2	201	212	FKIYSKHTPINL			10	1460.83	S2_FL_complex	0	1461.77	0.030624	0	0	6.68567	0.042554
P0DTC2	201	212	FKIYSKHTPINL			10	1460.83	S2_FL_complex	0.167	1463.07	0.040031	1.29665	0.050401	6.71858	0.043101
P0DTC2	201	212	FKIYSKHTPINL			10	1460.83	S2_FL_complex	1.667	1463.63	0.038667	1.85914	0.049325	6.73213	0.014526
P0DTC2	201	212	FKIYSKHTPINL			10	1460.83	S2_FL_complex	16.667	1463.88	0.036267	2.11349	0.047467	6.70885	0.047874
P0DTC2	201	212	FKIYSKHTPINL			10	1460.83	S2_FL_complex	166.667	1463.92	0.069468	2.15431	0.075919	6.69875	0.029915
P0DTC2	204	212	YSKHTPINL			7	1072.58	S2_3A3Fab_complex	0	1073.12	0.028091	0	0	6.21261	0.050862
P0DTC2	204	212	YSKHTPINL			7	1072.58	S2_3A3Fab_complex	0.167	1074.28	0.09604	1.15734	0.100064	6.27502	0.001263
P0DTC2	204	212	YSKHTPINL			7	1072.58	S2_3A3Fab_complex	1.667	1074.74	0.075639	1.61474	0.080687	6.27692	0.00801
P0DTC2	204	212	YSKHTPINL			7	1072.58	S2_3A3Fab_complex	16.667	1074.95	0.079043	1.82998	0.083886	6.23419	0.053472
P0DTC2	204	212	YSKHTPINL			7	1072.58	S2_3A3Fab_complex	166.667	1075.01	0.034462	1.88675	0.044461	6.2745	0.014057
P0DTC2	204	212	YSKHTPINL			7	1072.58	S2_Alone	0	1073.12	0.028091	0	0	6.21261	0.050862
P0DTC2	204	212	YSKHTPINL			7	1072.58	S2_Alone	0.167	1074.26	0.008767	1.13919	0.029428	6.23562	0.04311
P0DTC2	204	212	YSKHTPINL			7	1072.58	S2_Alone	1.667	1074.74	0.023182	1.62051	0.036422	6.24298	0.062154
P0DTC2	204	212	YSKHTPINL			7	1072.58	S2_Alone	16.667	1074.94	0.060037	1.81299	0.066284	6.27495	0.015063
P0DTC2	204	212	YSKHTPINL			7	1072.58	S2_Alone	166.667	1075.05	0.054878	1.92405	0.06165	6.21805	0.054663
P0DTC2	204	212	YSKHTPINL			7	1072.58	S2_FL_complex	0	1073.12	0.028091	0	0	6.21261	0.050862
P0DTC2	204	212	YSKHTPINL			7	1072.58	S2_FL_complex	0.167	1074.23	0.066765	1.10814	0.072434	6.25217	0.053575
P0DTC2	204	212	YSKHTPINL			7	1072.58	S2_FL_complex	1.667	1074.68	0.062576	1.55838	0.068593	6.27897	0.012927
P0DTC2	204	212	YSKHTPINL			7	1072.58	S2_FL_complex	16.667	1074.89	0.078487	1.77154	0.083362	6.25112	0.057358
P0DTC2	204	212	YSKHTPINL			7	1072.58	S2_FL_complex	166.667	1074.99	0.09948	1.87264	0.10337	6.23651	0.039495
P0DTC2	213	220	VRDLPQGF			6	931.5	S2_3A3Fab_complex	0	932.003	0.016571	0	0	7.05602	0.035825
P0DTC2	213	220	VRDLPQGF			6	931.5	S2_3A3Fab_complex	0.167	934.036	0.061096	2.03339	0.063303	7.09989	0.001705
P0DTC2	213	220	VRDLPQGF			6	931.5	S2_3A3Fab_complex	1.667	934.477	0.040747	2.47474	0.043988	7.09888	0.008117
P0DTC2	213	220	VRDLPQGF			6	931.5	S2_3A3Fab_complex	16.667	934.423	0.089142	2.42049	0.09067	7.07025	0.036803
P0DTC2	213	220	VRDLPQGF			6	931.5	S2_3A3Fab_complex	166.667	934.437	0.008131	2.43481	0.018458	7.10067	0.011846
P0DTC2	213	220	VRDLPQGF			6	931.5	S2_Alone	0	932.003	0.016571	0	0	7.05602	0.035825
P0DTC2	213	220	VRDLPQGF			6	931.5	S2_Alone	0.167	934.108	0.052245	2.10583	0.05481	7.06869	0.032695
P0DTC2	213	220	VRDLPQGF			6	931.5	S2_Alone	1.667	934.461	0.073391	2.45828	0.075238	7.0748	0.044425
P0DTC2	213	220	VRDLPQGF			6	931.5	S2_Alone	16.667	934.395	0.046647	2.39195	0.049503	7.09734	0.010517
P0DTC2	213	220	VRDLPQGF			6	931.5	S2_Alone	166.667	934.477	0.089416	2.47459	0.090938	7.05577	0.039708
P0DTC2	213	220	VRDLPQGF			6	931.5	S2_FL_complex	0	932.003	0.016571	0	0	7.05602	0.035825
P0DTC2	213	220	VRDLPQGF			6	931.5	S2_FL_complex	0.167	934.073	0.057329	2.07041	0.059676	7.08366	0.036471
P0DTC2	213	220	VRDLPQGF			6	931.5	S2_FL_complex	1.667	934.491	0.063614	2.48878	0.065737	7.09564	0.012632
P0DTC2	213	220	VRDLPQGF			6	931.5	S2_FL_complex	16.667	934.415	0.100978	2.41228	0.102329	7.07628	0.040797
P0DTC2	213	220	VRDLPQGF			6	931.5	S2_FL_complex	166.667	934.472	0.066961	2.46893	0.068981	7.06666	0.025832
P0DTC2	213	223	VRDLPQGFSAL			9	1202.65	S2_3A3Fab_complex	0	1203.59	0.015455	0	0	7.46166	0.024634
P0DTC2	213	223	VRDLPQGFSAL			9	1202.65	S2_3A3Fab_complex	0.167	1206.28	0.08843	2.68611	0.089771	7.49798	0.000749
P0DTC2	213	223	VRDLPQGFSAL			9	1202.65	S2_3A3Fab_complex	1.667	1207.07	0.066929	3.47845	0.06869	7.49226	0.008829
P0DTC2	213	223	VRDLPQGFSAL			9	1202.65	S2_3A3Fab_complex	16.667	1206.9	0.129164	3.30919	0.130085	7.47493	0.025255
P0DTC2	213	223	VRDLPQGFSAL			9	1202.65	S2_3A3Fab_complex	166.667	1207.01	0.122602	3.41831	0.123572	7.49538	0.010517
P0DTC2	213	223	VRDLPQGFSAL			9	1202.65	S2_Alone	0	1203.59	0.015455	0	0	7.46166	0.024634
P0DTC2	213	223	VRDLPQGFSAL			9	1202.65	S2_Alone	0.167	1206.37	0.092267	2.77596	0.093552	7.47172	0.023725
P0DTC2	213	223	VRDLPQGFSAL			9	1202.65	S2_Alone	1.667	1207.02	0.098537	3.43206	0.099741	7.48048	0.031852
P0DTC2	213	223	VRDLPQGFSAL			9	1202.65	S2_Alone	16.667	1206.94	0.108628	3.34651	0.109722	7.49472	0.008287
P0DTC2	213	223	VRDLPQGFSAL			9	1202.65	S2_Alone	166.667	1207.06	0.140396	3.46807	0.141244	7.46715	0.0302
P0DTC2	213	223	VRDLPQGFSAL			9	1202.65	S2_FL_complex	0	1203.59	0.015455	0	0	7.46166	0.024634
P0DTC2	213	223	VRDLPQGFSAL			9	1202.65	S2_FL_complex	0.167	1206.3	0.066516	2.70328	0.068288	7.48274	0.025643
P0DTC2	213	223	VRDLPQGFSAL			9	1202.65	S2_FL_complex	1.667	1207.01	0.099866	3.4171	0.101055	7.48942	0.013381
P0DTC2	213	223	VRDLPQGFSAL			9	1202.65	S2_FL_complex	16.667	1206.92	0.06969	3.33056	0.071383	7.47808	0.026638
P0DTC2	213	223	VRDLPQGFSAL			9	1202.65	S2_FL_complex	166.667	1207.06	0.079908	3.46615	0.081389	7.46621	0.014417
P0DTC2	221	228	SALEPLVD			6	843.446	S2_3A3Fab_complex	0	843.852	0.017786	0	0	7.42212	0.029839
P0DTC2	221	228	SALEPLVD			6	843.446	S2_3A3Fab_complex	0.167	844.245	0.04587	0.392133	0.049197	7.45662	0.002114
P0DTC2	221	228	SALEPLVD			6	843.446	S2_3A3Fab_complex	1.667	844.394	0.054389	0.541682	0.057224	7.45362	0.008788
P0DTC2	221	228	SALEPLVD			6	843.446	S2_3A3Fab_complex	16.667	844.836	0.033082	0.983378	0.03756	7.43715	0.029773
P0DTC2	221	228	SALEPLVD			6	843.446	S2_3A3Fab_complex	166.667	845.615	0.08856	1.76226	0.090329	7.45366	0.01102
P0DTC2	221	228	SALEPLVD			6	843.446	S2_Alone	0	843.852	0.017786	0	0	7.42212	0.029839
P0DTC2	221	228	SALEPLVD			6	843.446	S2_Alone	0.167	844.295	0.064505	0.442675	0.066912	7.43482	0.029669
P0DTC2	221	228	SALEPLVD			6	843.446	S2_Alone	1.667	844.387	0.033916	0.53473	0.038296	7.43855	0.035254
P0DTC2	221	228	SALEPLVD			6	843.446	S2_Alone	16.667	844.887	0.043454	1.0343	0.046953	7.45324	0.009406
P0DTC2	221	228	SALEPLVD			6	843.446	S2_Alone	166.667	845.654	0.088019	1.80116	0.089798	7.42133	0.035316
P0DTC2	221	228	SALEPLVD			6	843.446	S2_FL_complex	0	843.852	0.017786	0	0	7.42212	0.029839
P0DTC2	221	228	SALEPLVD			6	843.446	S2_FL_complex	0.167	844.288	0.066121	0.435817	0.068471	7.44177	0.028502
P0DTC2	221	228	SALEPLVD			6	843.446	S2_FL_complex	1.667	844.355	0.039105	0.502357	0.04296	7.45488	0.014248
P0DTC2	221	228	SALEPLVD			6	843.446	S2_FL_complex	16.667	844.881	0.007839	1.02833	0.019437	7.43142	0.03236
P0DTC2	221	228	SALEPLVD			6	843.446	S2_FL_complex	166.667	845.572	0.0666	1.71929	0.068934	7.41673	0.020003
P0DTC2	221	229	SALEPLVDL			7	956.53	S2_3A3Fab_complex	0	957.019	0.014995	0	0	8.18845	0.016236
P0DTC2	221	229	SALEPLVDL			7	956.53	S2_3A3Fab_complex	0.167	957.449	0.018238	0.429864	0.023611	8.20283	0.001783
P0DTC2	221	229	SALEPLVDL			7	956.53	S2_3A3Fab_complex	1.667	957.603	0.042637	0.584211	0.045197	8.19648	0.011495
P0DTC2	221	229	SALEPLVDL			7	956.53	S2_3A3Fab_complex	16.667	958.067	0.090582	1.04761	0.091815	8.18637	0.011514
P0DTC2	221	229	SALEPLVDL			7	956.53	S2_3A3Fab_complex	166.667	959.276	0.0971	2.25703	0.098251	8.19343	0.014942
P0DTC2	221	229	SALEPLVDL			7	956.53	S2_Alone	0	957.019	0.014995	0	0	8.18845	0.016236
P0DTC2	221	229	SALEPLVDL			7	956.53	S2_Alone	0.167	957.538	0.036761	0.518784	0.039702	8.18724	0.017
P0DTC2	221	229	SALEPLVDL			7	956.53	S2_Alone	1.667	957.584	0.026376	0.564852	0.03034	8.19208	0.015044
P0DTC2	221	229	SALEPLVDL			7	956.53	S2_Alone	16.667	958.071	0.052517	1.0521	0.054616	8.19828	0.006616
P0DTC2	221	229	SALEPLVDL			7	956.53	S2_Alone	166.667	959.243	0.09979	2.22406	0.10091	8.18541	0.01717
P0DTC2	221	229	SALEPLVDL			7	956.53	S2_FL_complex	0	957.019	0.014995	0	0	8.18845	0.016236
P0DTC2	221	229	SALEPLVDL			7	956.53	S2_FL_complex	0.167	957.487	0.046339	0.467905	0.048705	8.19412	0.01449
P0DTC2	221	229	SALEPLVDL			7	956.53	S2_FL_complex	1.667	957.575	0.023584	0.555584	0.027948	8.19499	0.011669
P0DTC2	221	229	SALEPLVDL			7	956.53	S2_FL_complex	16.667	958.048	0.050762	1.0293	0.05293	8.18982	0.013144
P0DTC2	221	229	SALEPLVDL			7	956.53	S2_FL_complex	166.667	959.296	0.070223	2.27652	0.071807	8.17615	0.007611
P0DTC2	242	265	LALHRSYLTPGDSSSGWTAGAAAY			22	2452.19	S2_3A3Fab_complex	0	2453.86	0.023235	0	0	7.1023	0.030459
P0DTC2	242	265	LALHRSYLTPGDSSSGWTAGAAAY			22	2452.19	S2_3A3Fab_complex	0.167	2461.95	0.094985	8.08385	0.097786	7.14416	0.002406
P0DTC2	242	265	LALHRSYLTPGDSSSGWTAGAAAY			22	2452.19	S2_3A3Fab_complex	1.667	2462.65	0.171689	8.78433	0.173254	7.14067	0.008233
P0DTC2	242	265	LALHRSYLTPGDSSSGWTAGAAAY			22	2452.19	S2_3A3Fab_complex	16.667	2462.79	0.081444	8.92672	0.084693	7.11613	0.032413
P0DTC2	242	265	LALHRSYLTPGDSSSGWTAGAAAY			22	2452.19	S2_3A3Fab_complex	166.667	2462.92	0.165786	9.06089	0.167406	7.13991	0.010807
P0DTC2	242	265	LALHRSYLTPGDSSSGWTAGAAAY			22	2452.19	S2_Alone	0	2453.85	0.029835	0	0	7.10263	0.030521
P0DTC2	242	265	LALHRSYLTPGDSSSGWTAGAAAY			22	2452.19	S2_Alone	0.167	2462.18	0.076989	8.3291	0.082568	7.11132	0.027691
P0DTC2	242	265	LALHRSYLTPGDSSSGWTAGAAAY			22	2452.19	S2_Alone	1.667	2462.63	0.123959	8.7839	0.127499	7.12158	0.039649
P0DTC2	242	265	LALHRSYLTPGDSSSGWTAGAAAY			22	2452.19	S2_Alone	16.667	2462.8	0.185391	8.95362	0.187777	7.1419	0.00755
P0DTC2	242	265	LALHRSYLTPGDSSSGWTAGAAAY			22	2452.19	S2_Alone	166.667	2463.08	0.202655	9.23249	0.20484	7.10127	0.036306
P0DTC2	242	265	LALHRSYLTPGDSSSGWTAGAAAY			22	2452.19	S2_FL_complex	0	2453.85	0.029835	0	0	7.10263	0.030521
P0DTC2	242	265	LALHRSYLTPGDSSSGWTAGAAAY			22	2452.19	S2_FL_complex	0.167	2461.95	0.145415	8.10423	0.148444	7.11815	0.02954
P0DTC2	242	265	LALHRSYLTPGDSSSGWTAGAAAY			22	2452.19	S2_FL_complex	1.667	2462.59	0.151975	8.74442	0.154876	7.13759	0.013533
P0DTC2	242	265	LALHRSYLTPGDSSSGWTAGAAAY			22	2452.19	S2_FL_complex	16.667	2462.66	0.108404	8.80891	0.112435	7.12384	0.033824
P0DTC2	242	265	LALHRSYLTPGDSSSGWTAGAAAY			22	2452.19	S2_FL_complex	166.667	2463.05	0.128197	9.20226	0.131623	7.12169	0.007639
P0DTC2	243	264	ALHRSYLTPGDSSSGWTAGAAA			20	2176.04	S2_3A3Fab_complex	0	2177	0	0	0	6.73599	0
P0DTC2	243	264	ALHRSYLTPGDSSSGWTAGAAA			20	2176.04	S2_3A3Fab_complex	0.167	2185.19	0.039922	8.19402	0.039922	6.81838	0.003091
P0DTC2	243	264	ALHRSYLTPGDSSSGWTAGAAA			20	2176.04	S2_3A3Fab_complex	1.667	2185.36	0.186926	8.36576	0.186926	6.81886	0.007997
P0DTC2	243	264	ALHRSYLTPGDSSSGWTAGAAA			20	2176.04	S2_3A3Fab_complex	16.667	2185.37	0.077587	8.37481	0.077587	6.78876	0.042462
P0DTC2	243	264	ALHRSYLTPGDSSSGWTAGAAA			20	2176.04	S2_3A3Fab_complex	166.667	2185.35	0.160535	8.35232	0.160535	6.82259	0.013144
P0DTC2	243	264	ALHRSYLTPGDSSSGWTAGAAA			20	2176.04	S2_Alone	0	2177.3	0.044575	0	0	6.76991	0.039929
P0DTC2	243	264	ALHRSYLTPGDSSSGWTAGAAA			20	2176.04	S2_Alone	0.167	2185.35	0.093074	8.04657	0.103197	6.78467	0.036316
P0DTC2	243	264	ALHRSYLTPGDSSSGWTAGAAA			20	2176.04	S2_Alone	1.667	2185.52	0.09071	8.21788	0.101071	6.79331	0.049183
P0DTC2	243	264	ALHRSYLTPGDSSSGWTAGAAA			20	2176.04	S2_Alone	16.667	2185.53	0.147297	8.23279	0.153894	6.81465	0.012808
P0DTC2	243	264	ALHRSYLTPGDSSSGWTAGAAA			20	2176.04	S2_Alone	166.667	2185.47	0.252907	8.16727	0.256805	6.78669	0.045353
P0DTC2	243	264	ALHRSYLTPGDSSSGWTAGAAA			20	2176.04	S2_FL_complex	0	2177.3	0.044575	0	0	6.76991	0.039929
P0DTC2	243	264	ALHRSYLTPGDSSSGWTAGAAA			20	2176.04	S2_FL_complex	0.167	2185.15	0.266055	7.85359	0.269763	6.80011	0.041115
P0DTC2	243	264	ALHRSYLTPGDSSSGWTAGAAA			20	2176.04	S2_FL_complex	1.667	2185.44	0.244279	8.14138	0.248312	6.81422	0.016215
P0DTC2	243	264	ALHRSYLTPGDSSSGWTAGAAA			20	2176.04	S2_FL_complex	16.667	2185.5	0.285414	8.20388	0.288873	6.79364	0.044932
P0DTC2	243	264	ALHRSYLTPGDSSSGWTAGAAA			20	2176.04	S2_FL_complex	166.667	2185.54	0.298256	8.24535	0.301568	6.78413	0.026641
P0DTC2	243	265	ALHRSYLTPGDSSSGWTAGAAAY			21	2339.11	S2_3A3Fab_complex	0	2340.35	0.049883	0	0	7.05979	0.018003
P0DTC2	243	265	ALHRSYLTPGDSSSGWTAGAAAY			21	2339.11	S2_3A3Fab_complex	0.167	2348.2	0.088621	7.85933	0.101696	7.06178	0.002862
P0DTC2	243	265	ALHRSYLTPGDSSSGWTAGAAAY			21	2339.11	S2_3A3Fab_complex	1.667	2348.81	0.258787	8.4653	0.263551	7.06043	0.007928
P0DTC2	243	265	ALHRSYLTPGDSSSGWTAGAAAY			21	2339.11	S2_3A3Fab_complex	16.667	2348.48	0.197505	8.1362	0.203707	7.03116	0.041937
P0DTC2	243	265	ALHRSYLTPGDSSSGWTAGAAAY			21	2339.11	S2_3A3Fab_complex	166.667	2348.7	0.274821	8.35904	0.279312	7.05875	0.012259
P0DTC2	243	265	ALHRSYLTPGDSSSGWTAGAAAY			21	2339.11	S2_Alone	0	2340.4	0.021838	0	0	7.01782	0.039553
P0DTC2	243	265	ALHRSYLTPGDSSSGWTAGAAAY			21	2339.11	S2_Alone	0.167	2348.52	0.161843	8.11959	0.16331	7.03036	0.03663
P0DTC2	243	265	ALHRSYLTPGDSSSGWTAGAAAY			21	2339.11	S2_Alone	1.667	2348.77	0.23639	8.36813	0.237397	7.03822	0.046187
P0DTC2	243	265	ALHRSYLTPGDSSSGWTAGAAAY			21	2339.11	S2_Alone	16.667	2348.58	0.185514	8.1781	0.186795	7.06248	0.008726
P0DTC2	243	265	ALHRSYLTPGDSSSGWTAGAAAY			21	2339.11	S2_Alone	166.667	2348.78	0.267752	8.37742	0.268641	7.01529	0.045149
P0DTC2	243	265	ALHRSYLTPGDSSSGWTAGAAAY			21	2339.11	S2_FL_complex	0	2340.4	0.021838	0	0	7.01782	0.039553
P0DTC2	243	265	ALHRSYLTPGDSSSGWTAGAAAY			21	2339.11	S2_FL_complex	0.167	2348.32	0.209666	7.9115	0.2108	7.04394	0.036104
P0DTC2	243	265	ALHRSYLTPGDSSSGWTAGAAAY			21	2339.11	S2_FL_complex	1.667	2348.69	0.333141	8.28614	0.333856	7.05473	0.014471
P0DTC2	243	265	ALHRSYLTPGDSSSGWTAGAAAY			21	2339.11	S2_FL_complex	16.667	2348.52	0.175477	8.11659	0.17683	7.03883	0.039068
P0DTC2	243	265	ALHRSYLTPGDSSSGWTAGAAAY			21	2339.11	S2_FL_complex	166.667	2348.82	0.23576	8.41557	0.23677	7.0238	0.025615
P0DTC2	245	265	HRSYLTPGDSSSGWTAGAAAY			19	2154.98	S2_3A3Fab_complex	0	2156.21	0.047498	0	0	6.95945	0.033286
P0DTC2	245	265	HRSYLTPGDSSSGWTAGAAAY			19	2154.98	S2_3A3Fab_complex	0.167	2163.8	0.043383	7.5895	0.064328	6.99523	0.001999
P0DTC2	245	265	HRSYLTPGDSSSGWTAGAAAY			19	2154.98	S2_3A3Fab_complex	1.667	2164.27	0.110074	8.05991	0.119884	6.99421	0.007639
P0DTC2	245	265	HRSYLTPGDSSSGWTAGAAAY			19	2154.98	S2_3A3Fab_complex	16.667	2164.02	0.088234	7.8109	0.100206	6.97413	0.031361
P0DTC2	245	265	HRSYLTPGDSSSGWTAGAAAY			19	2154.98	S2_3A3Fab_complex	166.667	2164.12	0.173784	7.91604	0.180158	6.99847	0.012823
P0DTC2	245	265	HRSYLTPGDSSSGWTAGAAAY			19	2154.98	S2_Alone	0	2156.21	0.047498	0	0	6.95945	0.033286
P0DTC2	245	265	HRSYLTPGDSSSGWTAGAAAY			19	2154.98	S2_Alone	0.167	2163.95	0.090521	7.73979	0.102226	6.97177	0.028205
P0DTC2	245	265	HRSYLTPGDSSSGWTAGAAAY			19	2154.98	S2_Alone	1.667	2164.15	0.150499	7.93699	0.157817	6.98	0.041033
P0DTC2	245	265	HRSYLTPGDSSSGWTAGAAAY			19	2154.98	S2_Alone	16.667	2163.97	0.168221	7.75696	0.174798	6.99528	0.013751
P0DTC2	245	265	HRSYLTPGDSSSGWTAGAAAY			19	2154.98	S2_Alone	166.667	2164.24	0.253491	8.03147	0.257903	6.95948	0.038625
P0DTC2	245	265	HRSYLTPGDSSSGWTAGAAAY			19	2154.98	S2_FL_complex	0	2156.21	0.047498	0	0	6.95945	0.033286
P0DTC2	245	265	HRSYLTPGDSSSGWTAGAAAY			19	2154.98	S2_FL_complex	0.167	2163.74	0.12456	7.53111	0.133308	6.98028	0.036522
P0DTC2	245	265	HRSYLTPGDSSSGWTAGAAAY			19	2154.98	S2_FL_complex	1.667	2164.14	0.175118	7.93329	0.181445	6.99419	0.016537
P0DTC2	245	265	HRSYLTPGDSSSGWTAGAAAY			19	2154.98	S2_FL_complex	16.667	2164.03	0.177289	7.81734	0.183541	6.97464	0.038062
P0DTC2	245	265	HRSYLTPGDSSSGWTAGAAAY			19	2154.98	S2_FL_complex	166.667	2164.21	0.196227	8.00447	0.201894	6.96411	0.022728
P0DTC2	267	276	VGYLQPRTFL			8	1193.67	S2_3A3Fab_complex	0	1194.34	0.024733	0	0	7.67452	0.023348
P0DTC2	267	276	VGYLQPRTFL			8	1193.67	S2_3A3Fab_complex	0.167	1195.06	0.044863	0.719864	0.051229	7.69835	0.001714
P0DTC2	267	276	VGYLQPRTFL			8	1193.67	S2_3A3Fab_complex	1.667	1195.59	0.072919	1.24971	0.076999	7.6924	0.010341
P0DTC2	267	276	VGYLQPRTFL			8	1193.67	S2_3A3Fab_complex	16.667	1195.8	0.034654	1.46667	0.042575	7.67199	0.0192
P0DTC2	267	276	VGYLQPRTFL			8	1193.67	S2_3A3Fab_complex	166.667	1195.87	0.118473	1.5375	0.121028	7.68826	0.008225
P0DTC2	267	276	VGYLQPRTFL			8	1193.67	S2_Alone	0	1194.34	0.024733	0	0	7.67452	0.023348
P0DTC2	267	276	VGYLQPRTFL			8	1193.67	S2_Alone	0.167	1195.11	0.113291	0.773903	0.11596	7.67921	0.02048
P0DTC2	267	276	VGYLQPRTFL			8	1193.67	S2_Alone	1.667	1195.52	0.089476	1.1871	0.092832	7.68458	0.024401
P0DTC2	267	276	VGYLQPRTFL			8	1193.67	S2_Alone	16.667	1195.87	0.042815	1.53559	0.049446	7.69628	0.007828
P0DTC2	267	276	VGYLQPRTFL			8	1193.67	S2_Alone	166.667	1195.9	0.076043	1.56073	0.079964	7.67856	0.026776
P0DTC2	267	276	VGYLQPRTFL			8	1193.67	S2_FL_complex	0	1194.34	0.024733	0	0	7.67452	0.023348
P0DTC2	267	276	VGYLQPRTFL			8	1193.67	S2_FL_complex	0.167	1195.11	0.034672	0.77011	0.04259	7.68422	0.020625
P0DTC2	267	276	VGYLQPRTFL			8	1193.67	S2_FL_complex	1.667	1195.49	0.04264	1.15684	0.049294	7.68932	0.011911
P0DTC2	267	276	VGYLQPRTFL			8	1193.67	S2_FL_complex	16.667	1195.82	0.060052	1.47983	0.064946	7.68121	0.023146
P0DTC2	267	276	VGYLQPRTFL			8	1193.67	S2_FL_complex	166.667	1195.94	0.065461	1.60441	0.069977	7.66812	0.011326
P0DTC2	291	305	CALDPLSETKCTLKS			13	1608.8	S2_3A3Fab_complex	0	1609.75	0.034352	0	0	6.94112	0.036064
P0DTC2	291	305	CALDPLSETKCTLKS			13	1608.8	S2_3A3Fab_complex	0.167	1610.82	0.051297	1.0683	0.061737	6.97408	0.003663
P0DTC2	291	305	CALDPLSETKCTLKS			13	1608.8	S2_3A3Fab_complex	1.667	1611.24	0.074139	1.48799	0.081711	6.97263	0.00686
P0DTC2	291	305	CALDPLSETKCTLKS			13	1608.8	S2_3A3Fab_complex	16.667	1611.64	0.091961	1.88711	0.098168	6.9354	0.037987
P0DTC2	291	305	CALDPLSETKCTLKS			13	1608.8	S2_3A3Fab_complex	166.667	1613.38	0.136004	3.63487	0.140276	6.97022	0.011607
P0DTC2	291	305	CALDPLSETKCTLKS			13	1608.8	S2_Alone	0	1609.75	0.034352	0	0	6.94112	0.036064
P0DTC2	291	305	CALDPLSETKCTLKS			13	1608.8	S2_Alone	0.167	1610.91	0.158931	1.16062	0.162601	6.93652	0.03397
P0DTC2	291	305	CALDPLSETKCTLKS			13	1608.8	S2_Alone	1.667	1611.12	0.114658	1.36911	0.119693	6.9449	0.04565
P0DTC2	291	305	CALDPLSETKCTLKS			13	1608.8	S2_Alone	16.667	1611.57	0.13049	1.81741	0.134936	6.97377	0.009267
P0DTC2	291	305	CALDPLSETKCTLKS			13	1608.8	S2_Alone	166.667	1613.47	0.305234	3.71768	0.307161	6.92382	0.040447
P0DTC2	291	305	CALDPLSETKCTLKS			13	1608.8	S2_FL_complex	0	1609.75	0.034352	0	0	6.94112	0.036064
P0DTC2	291	305	CALDPLSETKCTLKS			13	1608.8	S2_FL_complex	0.167	1610.9	0.135077	1.14813	0.139377	6.95211	0.035937
P0DTC2	291	305	CALDPLSETKCTLKS			13	1608.8	S2_FL_complex	1.667	1611.14	0.231653	1.39508	0.234187	6.96664	0.015608
P0DTC2	291	305	CALDPLSETKCTLKS			13	1608.8	S2_FL_complex	16.667	1611.51	0.177976	1.7616	0.181261	6.95332	0.039304
P0DTC2	291	305	CALDPLSETKCTLKS			13	1608.8	S2_FL_complex	166.667	1613.45	0.083948	3.7022	0.090705	6.93303	0.022124
P0DTC2	306	313	FTVEKGIY			7	956.509	S2_3A3Fab_complex	0	956.982	0.018087	0	0	7.00017	0.039655
P0DTC2	306	313	FTVEKGIY			7	956.509	S2_3A3Fab_complex	0.167	959.186	0	2.20441	0.018087	7.0409	0
P0DTC2	306	313	FTVEKGIY			7	956.509	S2_3A3Fab_complex	1.667	959.259	0.04676	2.27742	0.050136	7.04448	0.010153
P0DTC2	306	313	FTVEKGIY			7	956.509	S2_3A3Fab_complex	16.667	959.571	0.016805	2.58948	0.024688	7.00672	0.035538
P0DTC2	306	313	FTVEKGIY			7	956.509	S2_3A3Fab_complex	166.667	959.945	0.034995	2.96347	0.039392	7.04685	0.016101
P0DTC2	306	313	FTVEKGIY			7	956.509	S2_Alone	0	956.982	0.018087	0	0	7.00017	0.039655
P0DTC2	306	313	FTVEKGIY			7	956.509	S2_Alone	0.167	959.127	0.033449	2.14503	0.038026	7.01976	0.035467
P0DTC2	306	313	FTVEKGIY			7	956.509	S2_Alone	1.667	959.223	0.068138	2.24092	0.070497	7.0278	0.045862
P0DTC2	306	313	FTVEKGIY			7	956.509	S2_Alone	16.667	959.51	0.085877	2.52815	0.087761	7.04662	0.013468
P0DTC2	306	313	FTVEKGIY			7	956.509	S2_Alone	166.667	960.021	0.037702	3.03934	0.041816	7.00387	0.044124
P0DTC2	306	313	FTVEKGIY			7	956.509	S2_FL_complex	0	956.982	0.018087	0	0	7.00017	0.039655
P0DTC2	306	313	FTVEKGIY			7	956.509	S2_FL_complex	0.167	959.17	0.054322	2.18794	0.057254	7.02173	0.040614
P0DTC2	306	313	FTVEKGIY			7	956.509	S2_FL_complex	1.667	959.22	0.113845	2.23865	0.115273	7.04292	0.019011
P0DTC2	306	313	FTVEKGIY			7	956.509	S2_FL_complex	16.667	959.57	0.082085	2.58845	0.084054	7.01088	0.044684
P0DTC2	306	313	FTVEKGIY			7	956.509	S2_FL_complex	166.667	959.992	0.048337	3.01008	0.05161	6.99239	0.020636
P0DTC2	306	317	FTVEKGIYQTSN			11	1386.69	S2_3A3Fab_complex	0	1387.42	0.091012	0	0	6.73862	0.0402
P0DTC2	306	317	FTVEKGIYQTSN			11	1386.69	S2_3A3Fab_complex	0.167	1391.26	0	3.84305	0.091012	6.78903	0
P0DTC2	306	317	FTVEKGIYQTSN			11	1386.69	S2_3A3Fab_complex	1.667	1391.58	0.00288	4.16371	0.091058	6.77827	0.004778
P0DTC2	306	317	FTVEKGIYQTSN			11	1386.69	S2_3A3Fab_complex	16.667	1392.11	0.099879	4.68907	0.135126	6.75152	0.037887
P0DTC2	306	317	FTVEKGIYQTSN			11	1386.69	S2_3A3Fab_complex	166.667	1392.39	0.212601	4.96973	0.231262	6.77832	0.015862
P0DTC2	306	317	FTVEKGIYQTSN			11	1386.69	S2_Alone	0	1387.44	0.039051	0	0	6.7381	0.040049
P0DTC2	306	317	FTVEKGIYQTSN			11	1386.69	S2_Alone	0.167	1391.32	0	3.88107	0.039051	6.70202	0
P0DTC2	306	317	FTVEKGIYQTSN			11	1386.69	S2_Alone	1.667	1391.52	0.05283	4.07415	0.065696	6.80624	0.00299
P0DTC2	306	317	FTVEKGIYQTSN			11	1386.69	S2_Alone	16.667	1392.24	0.039056	4.7935	0.05523	6.77764	0.004864
P0DTC2	306	317	FTVEKGIYQTSN			11	1386.69	S2_Alone	166.667	1392.67	0.000925	5.23251	0.039062	6.74799	0.050069
P0DTC2	306	317	FTVEKGIYQTSN			11	1386.69	S2_FL_complex	0	1387.44	0.039051	0	0	6.7381	0.040049
P0DTC2	306	317	FTVEKGIYQTSN			11	1386.69	S2_FL_complex	0.167	1391.19	0.029045	3.74689	0.048668	6.7614	0.042469
P0DTC2	306	317	FTVEKGIYQTSN			11	1386.69	S2_FL_complex	1.667	1391.44	0.076664	3.99549	0.086037	6.78358	0.016842
P0DTC2	306	317	FTVEKGIYQTSN			11	1386.69	S2_FL_complex	16.667	1392.04	0.002913	4.60226	0.039159	6.72726	0.041263
P0DTC2	306	317	FTVEKGIYQTSN			11	1386.69	S2_FL_complex	166.667	1392.79	0.087265	5.34743	0.095604	6.74386	0.036791
P0DTC2	307	318	TVEKGIYQTSNF			11	1386.69	S2_3A3Fab_complex	0	1387.33	0.014209	0	0	6.93687	0.032251
P0DTC2	307	318	TVEKGIYQTSNF			11	1386.69	S2_3A3Fab_complex	0.167	1390.63	0.031541	3.29897	0.034593	6.98836	0.001702
P0DTC2	307	318	TVEKGIYQTSNF			11	1386.69	S2_3A3Fab_complex	1.667	1391.34	0.050145	4.00975	0.052119	6.98618	0.00993
P0DTC2	307	318	TVEKGIYQTSNF			11	1386.69	S2_3A3Fab_complex	16.667	1392.08	0.092421	4.7568	0.093507	6.95639	0.036508
P0DTC2	307	318	TVEKGIYQTSNF			11	1386.69	S2_3A3Fab_complex	166.667	1392.59	0.163383	5.26637	0.163999	6.98512	0.012545
P0DTC2	307	318	TVEKGIYQTSNF			11	1386.69	S2_Alone	0	1387.33	0.014209	0	0	6.93687	0.032251
P0DTC2	307	318	TVEKGIYQTSNF			11	1386.69	S2_Alone	0.167	1390.59	0.075674	3.25955	0.076997	6.95396	0.03225
P0DTC2	307	318	TVEKGIYQTSNF			11	1386.69	S2_Alone	1.667	1391.41	0.067156	4.07932	0.068643	6.96404	0.041792
P0DTC2	307	318	TVEKGIYQTSNF			11	1386.69	S2_Alone	16.667	1392.1	0.115345	4.76839	0.116217	6.98368	0.010137
P0DTC2	307	318	TVEKGIYQTSNF			11	1386.69	S2_Alone	166.667	1392.68	0.141642	5.34839	0.142352	6.93879	0.037464
P0DTC2	307	318	TVEKGIYQTSNF			11	1386.69	S2_FL_complex	0	1387.33	0.014209	0	0	6.93687	0.032251
P0DTC2	307	318	TVEKGIYQTSNF			11	1386.69	S2_FL_complex	0.167	1390.66	0.086592	3.33568	0.08775	6.97103	0.038802
P0DTC2	307	318	TVEKGIYQTSNF			11	1386.69	S2_FL_complex	1.667	1391.43	0.049916	4.10445	0.051899	6.97586	0.008162
P0DTC2	307	318	TVEKGIYQTSNF			11	1386.69	S2_FL_complex	16.667	1392.1	0.045834	4.77121	0.047986	6.96318	0.042317
P0DTC2	307	318	TVEKGIYQTSNF			11	1386.69	S2_FL_complex	166.667	1392.77	0.079987	5.4471	0.081239	6.95344	0.023831
P0DTC2	310	318	KGIYQTSNF			8	1057.53	S2_3A3Fab_complex	0	1058.08	0.024001	0	0	6.84222	0.039206
P0DTC2	310	318	KGIYQTSNF			8	1057.53	S2_3A3Fab_complex	0.167	1059.87	0.023163	1.78265	0.033355	6.89132	0.003403
P0DTC2	310	318	KGIYQTSNF			8	1057.53	S2_3A3Fab_complex	1.667	1060.49	0.026875	2.40576	0.036032	6.89091	0.006796
P0DTC2	310	318	KGIYQTSNF			8	1057.53	S2_3A3Fab_complex	16.667	1061.19	0.04572	3.10596	0.051637	6.85572	0.040997
P0DTC2	310	318	KGIYQTSNF			8	1057.53	S2_3A3Fab_complex	166.667	1061.68	0.037053	3.5987	0.044147	6.89769	0.008727
P0DTC2	310	318	KGIYQTSNF			8	1057.53	S2_Alone	0	1058.08	0.024001	0	0	6.84222	0.039206
P0DTC2	310	318	KGIYQTSNF			8	1057.53	S2_Alone	0.167	1059.84	0.044831	1.76094	0.050851	6.8585	0.036446
P0DTC2	310	318	KGIYQTSNF			8	1057.53	S2_Alone	1.667	1060.54	0.038132	2.4553	0.045056	6.838	0.040837
P0DTC2	310	318	KGIYQTSNF			8	1057.53	S2_Alone	16.667	1061.22	0.051231	3.13439	0.056574	6.89112	0.011832
P0DTC2	310	318	KGIYQTSNF			8	1057.53	S2_Alone	166.667	1061.77	0.052573	3.68969	0.057793	6.83876	0.043248
P0DTC2	310	318	KGIYQTSNF			8	1057.53	S2_FL_complex	0	1058.08	0.024001	0	0	6.84222	0.039206
P0DTC2	310	318	KGIYQTSNF			8	1057.53	S2_FL_complex	0.167	1059.83	0.0797	1.74412	0.083235	6.86951	0.040394
P0DTC2	310	318	KGIYQTSNF			8	1057.53	S2_FL_complex	1.667	1060.47	0.052885	2.38617	0.058076	6.88638	0.014706
P0DTC2	310	318	KGIYQTSNF			8	1057.53	S2_FL_complex	16.667	1061.16	0.093492	3.07925	0.096523	6.86136	0.045711
P0DTC2	310	318	KGIYQTSNF			8	1057.53	S2_FL_complex	166.667	1061.7	0.044696	3.61489	0.050732	6.85341	0.030395
P0DTC2	319	325	RVQPTES			5	816.421	S2_3A3Fab_complex	0	817.061	0.049737	0	0	5.14238	0.059618
P0DTC2	319	325	RVQPTES			5	816.421	S2_3A3Fab_complex	0.167	819.05	0.03017	1.98857	0.058172	5.19	0.00378
P0DTC2	319	325	RVQPTES			5	816.421	S2_3A3Fab_complex	1.667	819.165	0.033101	2.10352	0.059745	5.19505	0.011261
P0DTC2	319	325	RVQPTES			5	816.421	S2_3A3Fab_complex	16.667	819.153	0.063337	2.0923	0.080532	5.14527	0.074127
P0DTC2	319	325	RVQPTES			5	816.421	S2_3A3Fab_complex	166.667	819.174	0.02302	2.11244	0.054806	5.20143	0.018852
P0DTC2	319	325	RVQPTES			5	816.421	S2_Alone	0	817.061	0.049737	0	0	5.14238	0.059618
P0DTC2	319	325	RVQPTES			5	816.421	S2_Alone	0.167	819.025	0.049619	1.9636	0.070255	5.13552	0.057445
P0DTC2	319	325	RVQPTES			5	816.421	S2_Alone	1.667	819.148	0.049279	2.08657	0.070016	5.15848	0.087727
P0DTC2	319	325	RVQPTES			5	816.421	S2_Alone	16.667	819.157	0.036854	2.0957	0.061903	5.19273	0.01932
P0DTC2	319	325	RVQPTES			5	816.421	S2_Alone	166.667	819.167	0.058372	2.10568	0.076688	5.08145	0.061868
P0DTC2	319	325	RVQPTES			5	816.421	S2_FL_complex	0	817.061	0.049737	0	0	5.14238	0.059618
P0DTC2	319	325	RVQPTES			5	816.421	S2_FL_complex	0.167	819.074	0.025093	2.013	0.055708	5.16947	0.071612
P0DTC2	319	325	RVQPTES			5	816.421	S2_FL_complex	1.667	819.134	0.042973	2.07251	0.06573	5.1932	0.027866
P0DTC2	319	325	RVQPTES			5	816.421	S2_FL_complex	16.667	819.129	0.028871	2.06806	0.057509	5.20475	0.029426
P0DTC2	319	325	RVQPTES			5	816.421	S2_FL_complex	166.667	819.174	0.044048	2.11307	0.066438	5.13667	0.056173
P0DTC2	348	361	ASVYAWNRKRISNC			13	1667.84	S2_3A3Fab_complex	0	1670.71	0.012108	0	0	6.47739	0.046604
P0DTC2	348	361	ASVYAWNRKRISNC			13	1667.84	S2_3A3Fab_complex	0.167	1670.92	2.27374e-13	0.213019	0.012108	6.54735	0
P0DTC2	348	361	ASVYAWNRKRISNC			13	1667.84	S2_3A3Fab_complex	1.667	1670.98	0.00757	0.264716	0.014279	6.54586	0.008811
P0DTC2	348	361	ASVYAWNRKRISNC			13	1667.84	S2_3A3Fab_complex	16.667	1670.97	2.27374e-13	0.258799	0.012108	6.56913	0
P0DTC2	348	361	ASVYAWNRKRISNC			13	1667.84	S2_3A3Fab_complex	166.667	1671.28	0.019118	0.568728	0.02263	6.5396	0.002672
P0DTC2	348	361	ASVYAWNRKRISNC			13	1667.84	S2_Alone	0	1670.69	0.120783	0	0	6.4908	0.048794
P0DTC2	348	361	ASVYAWNRKRISNC			13	1667.84	S2_Alone	0.167	1671.03	0.045709	0.339889	0.129142	6.48327	0.035711
P0DTC2	348	361	ASVYAWNRKRISNC			13	1667.84	S2_Alone	1.667	1670.94	0	0.252587	0.120783	6.55753	0
P0DTC2	348	361	ASVYAWNRKRISNC			13	1667.84	S2_Alone	16.667	1671.02	0	0.335166	0.120783	6.55678	0
P0DTC2	348	361	ASVYAWNRKRISNC			13	1667.84	S2_Alone	166.667	1671.3	0	0.608819	0.120783	6.55669	0
P0DTC2	348	361	ASVYAWNRKRISNC			13	1667.84	S2_FL_complex	0	1670.65	0.105884	0	0	6.48126	0.043146
P0DTC2	348	361	ASVYAWNRKRISNC			13	1667.84	S2_FL_complex	0.167	1670.94	0.037525	0.286465	0.112336	6.52604	0.050238
P0DTC2	348	361	ASVYAWNRKRISNC			13	1667.84	S2_FL_complex	1.667	1670.99	0.053601	0.341484	0.118678	6.54556	0.018503
P0DTC2	348	361	ASVYAWNRKRISNC			13	1667.84	S2_FL_complex	16.667	1671.02	0.020105	0.375158	0.107775	6.52081	0.054296
P0DTC2	348	361	ASVYAWNRKRISNC			13	1667.84	S2_FL_complex	166.667	1671.2	0.081157	0.553008	0.133408	6.50347	0.039172
P0DTC2	351	361	YAWNRKRISNC			10	1410.71	S2_3A3Fab_complex	0	1411.56	0.02992	0	0	6.20224	0.047497
P0DTC2	351	361	YAWNRKRISNC			10	1410.71	S2_3A3Fab_complex	0.167	1413.11	0.099337	1.54548	0.103745	6.26595	0.002956
P0DTC2	351	361	YAWNRKRISNC			10	1410.71	S2_3A3Fab_complex	1.667	1413.22	0.035949	1.65695	0.046771	6.26955	0.007321
P0DTC2	351	361	YAWNRKRISNC			10	1410.71	S2_3A3Fab_complex	16.667	1413.41	0.067252	1.85106	0.073608	6.21897	0.055179
P0DTC2	351	361	YAWNRKRISNC			10	1410.71	S2_3A3Fab_complex	166.667	1414.03	0.0938	2.47165	0.098456	6.26739	0.013103
P0DTC2	351	361	YAWNRKRISNC			10	1410.71	S2_Alone	0	1411.56	0.02992	0	0	6.20224	0.047497
P0DTC2	351	361	YAWNRKRISNC			10	1410.71	S2_Alone	0.167	1413.2	0.090759	1.63874	0.095563	6.21933	0.046513
P0DTC2	351	361	YAWNRKRISNC			10	1410.71	S2_Alone	1.667	1413.34	0.118326	1.78297	0.12205	6.22091	0.063678
P0DTC2	351	361	YAWNRKRISNC			10	1410.71	S2_Alone	16.667	1413.43	0.088762	1.87388	0.093669	6.26874	0.014041
P0DTC2	351	361	YAWNRKRISNC			10	1410.71	S2_Alone	166.667	1414.16	0.088217	2.59878	0.093152	6.17941	0.036825
P0DTC2	351	361	YAWNRKRISNC			10	1410.71	S2_FL_complex	0	1411.56	0.02992	0	0	6.20224	0.047497
P0DTC2	351	361	YAWNRKRISNC			10	1410.71	S2_FL_complex	0.167	1413.13	0.084759	1.57308	0.089885	6.24071	0.050668
P0DTC2	351	361	YAWNRKRISNC			10	1410.71	S2_FL_complex	1.667	1413.27	0.07819	1.70893	0.083719	6.25966	0.009093
P0DTC2	351	361	YAWNRKRISNC			10	1410.71	S2_FL_complex	16.667	1413.42	0.063244	1.85596	0.069965	6.22455	0.060308
P0DTC2	351	361	YAWNRKRISNC			10	1410.71	S2_FL_complex	166.667	1414.03	0.103968	2.47418	0.108187	6.2171	0.04176
P0DTC2	400	420	FVIRGDEVRQIAPGQTGKIAD			19	2270.23	S2_3A3Fab_complex	0	2271.76	0.050091	0	0	6.57183	0.03952
P0DTC2	400	420	FVIRGDEVRQIAPGQTGKIAD			19	2270.23	S2_3A3Fab_complex	0.167	2273.82	0.033925	2.05304	0.060498	6.62065	0.003916
P0DTC2	400	420	FVIRGDEVRQIAPGQTGKIAD			19	2270.23	S2_3A3Fab_complex	1.667	2274.79	0.17681	3.02815	0.183768	6.6245	0.008622
P0DTC2	400	420	FVIRGDEVRQIAPGQTGKIAD			19	2270.23	S2_3A3Fab_complex	16.667	2275.34	0.175151	3.57904	0.182173	6.58336	0.045434
P0DTC2	400	420	FVIRGDEVRQIAPGQTGKIAD			19	2270.23	S2_3A3Fab_complex	166.667	2276.54	0.13773	4.77307	0.146556	6.6231	0.010074
P0DTC2	400	420	FVIRGDEVRQIAPGQTGKIAD			19	2270.23	S2_Alone	0	2271.76	0.050091	0	0	6.57183	0.03952
P0DTC2	400	420	FVIRGDEVRQIAPGQTGKIAD			19	2270.23	S2_Alone	0.167	2274.05	0.177578	2.28393	0.184507	6.58216	0.039895
P0DTC2	400	420	FVIRGDEVRQIAPGQTGKIAD			19	2270.23	S2_Alone	1.667	2274.76	0.216096	2.9939	0.221825	6.59113	0.056563
P0DTC2	400	420	FVIRGDEVRQIAPGQTGKIAD			19	2270.23	S2_Alone	16.667	2275.25	0.139529	3.49203	0.148248	6.62233	0.011482
P0DTC2	400	420	FVIRGDEVRQIAPGQTGKIAD			19	2270.23	S2_Alone	166.667	2276.71	0.250774	4.95044	0.255728	6.56186	0.047311
P0DTC2	400	420	FVIRGDEVRQIAPGQTGKIAD			19	2270.23	S2_FL_complex	0	2271.76	0.050091	0	0	6.57183	0.03952
P0DTC2	400	420	FVIRGDEVRQIAPGQTGKIAD			19	2270.23	S2_FL_complex	0.167	2273.86	0.039834	2.09818	0.063998	6.60079	0.044162
P0DTC2	400	420	FVIRGDEVRQIAPGQTGKIAD			19	2270.23	S2_FL_complex	1.667	2274.71	0.131197	2.9453	0.140434	6.61754	0.014162
P0DTC2	400	420	FVIRGDEVRQIAPGQTGKIAD			19	2270.23	S2_FL_complex	16.667	2275.31	0.156632	3.54932	0.164446	6.59153	0.052675
P0DTC2	400	420	FVIRGDEVRQIAPGQTGKIAD			19	2270.23	S2_FL_complex	166.667	2276.52	0.21602	4.76119	0.221752	6.58046	0.03182
P0DTC2	400	421	FVIRGDEVRQIAPGQTGKIADY			20	2433.29	S2_3A3Fab_complex	0	2434.8	0.039985	0	0	6.84065	0.036447
P0DTC2	400	421	FVIRGDEVRQIAPGQTGKIADY			20	2433.29	S2_3A3Fab_complex	0.167	2437.37	0.035136	2.56694	0.053229	6.884	0.003074
P0DTC2	400	421	FVIRGDEVRQIAPGQTGKIADY			20	2433.29	S2_3A3Fab_complex	1.667	2438.03	0.133741	3.22588	0.13959	6.88347	0.009629
P0DTC2	400	421	FVIRGDEVRQIAPGQTGKIADY			20	2433.29	S2_3A3Fab_complex	16.667	2438.82	0.122218	4.01641	0.128592	6.84574	0.040021
P0DTC2	400	421	FVIRGDEVRQIAPGQTGKIADY			20	2433.29	S2_3A3Fab_complex	166.667	2440	0.121435	5.198	0.127849	6.88307	0.012538
P0DTC2	400	421	FVIRGDEVRQIAPGQTGKIADY			20	2433.29	S2_Alone	0	2434.8	0.039985	0	0	6.84065	0.036447
[truncated: 2,092 more rows]
