# Supplementary material for: Identification of a conserved S2 epitope present on spike proteins from all highly pathogenic coronaviruses
Source: eLife. 2023 Mar 21;12:e83710. doi: 10.7554/eLife.83710 (PMC10030117; doi:10.7554/eLife.83710)
Supplement: Figure 2—source data 1. [file elife-83710-fig2-data1.xlsx]

## Sheet: Fig 2b mAb 2-4 Source Data
BLI Response (nm) after mAb 2-4 coupled biosensors are exposed to HexaPro then soluble ACE2
	HexaPro-Buffer-ACE2		HexaPro-Buffer-Buffer		Buffer-Buffer-Buffer
Time (s)	replicate 1	replicate 2	replicate 1	replicate 2	replicate 1	replicate 2
Move biosensors to:	HexaPro		HexaPro		Buffer
0	7.63278e-17	5e-06	2e-06	-1e-06	2e-06	-2e-06
1	0.001717	0.002017	0.003034	0.004018	0.000458	-3.5e-05
2	0.006477	0.009263	0.006591	0.004468	0.005754	-1.5e-05
3	0.010084	0.015617	0.015755	0.019584	0.005368	-0.00101
4	0.029522	0.03913	0.033441	0.037334	0.006386	0.001244
5	0.042613	0.048861	0.046888	0.049677	0.004039	0.001687
6	0.056964	0.059104	0.058965	0.058741	-0.00062	0.003987
7	0.059904	0.066501	0.064926	0.066046	-0.00097	-0.00192
8	0.078185	0.085567	0.079519	0.085811	-0.0017	-0.00217
9	0.092094	0.094043	0.093121	0.094542	-0.00339	-0.00059
10	0.103975	0.109481	0.106767	0.10961	0.000364	0.002092
11	0.110254	0.124113	0.118932	0.12099	0.003469	0.001629
12	0.120683	0.138196	0.131907	0.132047	-0.00048	-0.00333
13	0.135492	0.147246	0.143672	0.144168	0.003296	0.002381
14	0.145223	0.157244	0.154073	0.155474	0.004655	0.000705
15	0.155374	0.168734	0.165292	0.168696	0.002665	0.001032
16	0.166119	0.176109	0.170058	0.176467	0.005048	0.000609
17	0.178674	0.19238	0.186012	0.189195	0.004344	0.006157
18	0.186661	0.197315	0.19359	0.198051	0.004599	0.005541
19	0.191936	0.206314	0.201558	0.207963	0.002002	0.00077
20	0.199144	0.213017	0.207081	0.214126	0.001921	-0.00172
21	0.213805	0.227988	0.219865	0.228047	-0.00046	0.007665
22	0.214024	0.233816	0.225309	0.230721	-0.00113	-0.00145
23	0.225318	0.241142	0.232595	0.236738	-0.0043	-0.00803
24	0.237771	0.25624	0.252089	0.248378	0.004975	0.000823
25	0.249138	0.264625	0.254317	0.260594	0.000671	-0.0036
26	0.249942	0.267559	0.263671	0.26827	-0.0012	-0.00278
27	0.259516	0.276789	0.270014	0.274547	-0.00512	0.000304
28	0.265953	0.281947	0.275673	0.281298	-0.00147	0.000321
29	0.277869	0.298159	0.287331	0.29274	0.001302	0.002054
30	0.286352	0.306783	0.291011	0.3017	-0.00313	0.001157
31	0.289939	0.30769	0.300703	0.306257	0.000322	0.002037
32	0.296302	0.322491	0.306235	0.314561	0.003758	0.000621
33	0.305998	0.328732	0.315904	0.319286	0.002327	0.002886
34	0.316427	0.333524	0.323617	0.329711	0.002355	0.006006
35	0.313951	0.334717	0.325909	0.332171	0.002019	-0.00271
36	0.323062	0.347743	0.335646	0.34142	0.005893	0.001269
37	0.326306	0.347794	0.340197	0.346103	-0.00703	-0.00231
38	0.332114	0.358356	0.348795	0.352001	0.00132	-0.001
39	0.336761	0.364182	0.350737	0.357765	-0.0046	-0.00441
40	0.34724	0.372837	0.363807	0.36472	-0.00298	-0.00076
41	0.353363	0.377987	0.368294	0.374123	0.002437	-0.00258
42	0.35845	0.378035	0.368045	0.376735	-0.00637	-0.00595
43	0.370438	0.393886	0.384456	0.390292	0.005725	0.002291
44	0.364239	0.396355	0.378232	0.385307	-0.00763	-0.00611
45	0.370731	0.393884	0.385435	0.395157	-0.00466	-0.0077
46	0.382456	0.408658	0.397332	0.403989	-0.00327	-0.00214
47	0.385972	0.410459	0.399992	0.406554	-0.00091	-0.003
48	0.39742	0.4252	0.407971	0.414163	-0.00099	0.000448
49	0.397492	0.420101	0.406843	0.418075	-0.0016	-0.00046
50	0.405832	0.424495	0.417192	0.425917	0.001447	-0.00072
51	0.40786	0.429027	0.420352	0.426087	-0.00441	-0.00149
52	0.406276	0.435524	0.425161	0.431215	-0.00667	-0.00599
53	0.420689	0.447157	0.430754	0.43967	-0.00032	0.00079
54	0.420001	0.449126	0.442023	0.446032	0.000282	-0.00178
55	0.424924	0.452228	0.442077	0.445956	0.001574	-0.00404
56	0.426012	0.454366	0.442034	0.447689	0.00184	-0.00407
57	0.434984	0.467162	0.451598	0.457825	-0.00035	-0.00037
58	0.437153	0.46722	0.455672	0.460147	-0.00376	-0.00216
59	0.440538	0.473503	0.462009	0.470676	-0.00147	-0.00248
60	0.443059	0.475643	0.469926	0.467845	0.001418	-0.00444
61	0.444475	0.478178	0.467837	0.473574	-0.00484	-0.0051
62	0.456891	0.487637	0.47327	0.484755	-0.0007	0.000469
63	0.459424	0.488346	0.476998	0.485269	-0.0031	-0.0043
64	0.458047	0.489953	0.478937	0.480772	-0.00953	-0.00823
65	0.468198	0.499853	0.488	0.491228	0.00198	-0.00148
66	0.472224	0.502902	0.489138	0.496625	-0.00048	-0.00317
67	0.466194	0.504415	0.49122	0.495034	-0.00202	-0.01019
68	0.476299	0.507886	0.492398	0.504035	-0.00307	-0.00718
69	0.4863	0.513201	0.502598	0.505792	-0.00251	-0.00407
70	0.480137	0.517387	0.5008	0.510866	-0.00231	-0.00287
71	0.489833	0.52259	0.508235	0.517883	0.00119	-0.0016
72	0.493255	0.528856	0.516075	0.522628	0.000923	-0.00013
73	0.495031	0.529461	0.513678	0.52138	-0.00102	-0.00212
74	0.501349	0.539974	0.517842	0.530113	-0.00125	-0.00086
75	0.502	0.542218	0.525812	0.530821	0.001469	-0.00068
76	0.503537	0.541603	0.525551	0.537001	-0.00017	-0.00332
77	0.515884	0.545391	0.532045	0.538281	0.003038	-0.00267
78	0.509924	0.544021	0.532739	0.545117	-0.00492	-0.00046
79	0.520309	0.552685	0.537519	0.541525	0.000906	-0.00347
Move biosensors to:	Buffer		Buffer		Buffer
80	0.545612	0.581229	0.568215	0.578307	-0.00394	-0.00719
81	0.546077	0.58925	0.57388	0.582081	-0.00062	-0.00294
82	0.539991	0.584659	0.564486	0.579914	-0.001	-0.00491
83	0.54217	0.583963	0.569737	0.575842	-0.00148	-0.00522
84	0.537939	0.585847	0.567123	0.574005	-0.00116	-0.00372
85	0.536281	0.57931	0.564211	0.572083	-0.00349	-0.00307
86	0.537145	0.574266	0.559574	0.574753	-0.00216	-0.00695
87	0.536987	0.573671	0.557623	0.56911	-0.00311	-0.00892
88	0.540772	0.575868	0.564763	0.570843	-0.00209	-9.1e-05
89	0.53998	0.575874	0.559041	0.570125	-0.00241	-0.00439
90	0.528479	0.568436	0.556571	0.564393	-0.0046	-0.00772
91	0.532064	0.575604	0.563571	0.567883	-0.00087	0.000742
92	0.527735	0.570975	0.553375	0.564035	-0.00287	-0.00818
93	0.523976	0.562356	0.548899	0.556301	-0.00418	-0.01112
94	0.529633	0.569187	0.554529	0.565806	-0.00074	0.000915
95	0.519012	0.564048	0.549532	0.556934	-0.00559	-0.01249
96	0.527366	0.566736	0.55276	0.563881	0.002015	-0.00599
97	0.526112	0.564473	0.553032	0.560736	0.000221	-0.00726
98	0.523662	0.563254	0.545328	0.556986	-0.00368	-0.00717
99	0.523425	0.560759	0.547482	0.559635	-0.00211	-0.00216
100	0.516666	0.561271	0.546806	0.553719	-0.00828	-0.01233
101	0.51427	0.555717	0.542854	0.549918	-0.00465	-0.00916
102	0.516626	0.558469	0.540498	0.552862	-0.00272	-0.00891
103	0.521771	0.560054	0.543737	0.556325	0.001045	-0.0004
104	0.51773	0.560176	0.544592	0.555355	-0.00135	-0.00317
105	0.511675	0.555878	0.539857	0.543796	0.001624	-0.00639
Move biosensors to:	ACE2		Buffer		Buffer
106	0.5129	0.553154	0.539527	0.548488	-0.00268	-0.0106
107	0.510653	0.550169	0.534133	0.544209	-0.00444	-0.00974
108	0.516328	0.553591	0.542503	0.547863	-0.00124	-0.00499
109	0.507019	0.551762	0.53632	0.544471	-0.00782	-0.00895
110	0.5092	0.544375	0.533121	0.543564	-0.00898	-0.00958
111	0.506348	0.552496	0.533446	0.544382	0.000752	-0.00437
112	0.507372	0.552091	0.540667	0.545965	0.010106	0.007285
113	0.505007	0.554059	0.547259	0.548567	0.007893	0.010505
114	0.50111	0.546716	0.535143	0.537353	0.003743	0.002081
115	0.504849	0.547451	0.539615	0.538739	0.005825	0.003308
116	0.501084	0.553993	0.538139	0.542559	0.008473	0.008706
117	0.499347	0.549654	0.538046	0.542324	0.006171	0.0062
118	0.501084	0.549046	0.538546	0.54247	0.01007	0.011991
119	0.501221	0.55169	0.537106	0.540012	0.010538	0.00881
120	0.500873	0.550114	0.536766	0.541889	0.00826	0.010672
121	0.500922	0.544434	0.529074	0.536741	0.010469	0.002198
122	0.496883	0.54506	0.536144	0.539195	0.009844	0.008972
123	0.501536	0.547809	0.532944	0.540779	0.005969	0.009185
124	0.494825	0.545424	0.530616	0.536033	0.008246	0.005632
125	0.498299	0.54658	0.532008	0.53364	0.009727	0.009077
126	0.494519	0.54382	0.527353	0.53597	0.011075	0.00293
127	0.501794	0.545592	0.530618	0.539613	0.012083	0.013793
128	0.493611	0.541899	0.526626	0.532525	0.00565	0.004162
129	0.500349	0.547365	0.531809	0.5347	0.014436	0.01043
130	0.488525	0.538651	0.523002	0.531489	0.007476	0.001372
131	0.497287	0.547502	0.535265	0.533965	0.015776	0.013628
132	0.498228	0.546134	0.526739	0.529343	0.011523	0.006131
133	0.498746	0.545476	0.533204	0.53495	0.012835	0.014506
134	0.495054	0.547504	0.525344	0.530887	0.014575	0.010455
135	0.487918	0.541366	0.524877	0.523632	0.005195	0.003417
136	0.489067	0.545991	0.522667	0.529352	0.010041	0.006404
137	0.483043	0.534419	0.519134	0.528645	0.006804	0.00451
138	0.492768	0.537726	0.520933	0.527334	0.014391	0.009228
139	0.487988	0.535998	0.520191	0.523076	0.003102	0.003253
140	0.49136	0.539173	0.524871	0.527575	0.011104	0.004221
141	0.488146	0.538198	0.520135	0.5248	0.010798	0.004568
142	0.494886	0.546765	0.525936	0.530499	0.014825	0.012629
143	0.484631	0.537031	0.521931	0.520644	0.008954	0.007077
144	0.482925	0.53577	0.517464	0.522447	0.010297	0.008942
145	0.487517	0.540511	0.521764	0.530105	0.01519	0.014401
146	0.490146	0.541543	0.524258	0.523391	0.016578	0.010838
147	0.481405	0.53451	0.517496	0.515486	0.009289	0.010426
148	0.48445	0.537058	0.518359	0.522861	0.007962	0.007209
149	0.491702	0.544332	0.524167	0.524368	0.018953	0.015205
150	0.480618	0.5338	0.518782	0.515558	0.01263	0.009278
151	0.485855	0.540604	0.517537	0.52267	0.016075	0.012827
152	0.478102	0.530316	0.514197	0.517845	0.005238	0.007049
153	0.484898	0.539658	0.517113	0.516029	0.013172	0.010125
154	0.478101	0.533099	0.512352	0.509533	0.009559	0.004612
155	0.483887	0.5369	0.51591	0.515741	0.011311	0.00894
156	0.47726	0.529706	0.510985	0.515359	0.005424	0.00215
157	0.476807	0.536213	0.510704	0.516458	0.010786	0.01046
158	0.478792	0.534866	0.513309	0.518804	0.017102	0.009888
159	0.478796	0.531023	0.509905	0.513054	0.008206	0.005636
160	0.475258	0.532675	0.510682	0.513215	0.010733	0.005938
161	0.472291	0.527513	0.502466	0.512418	0.009383	0.0033
162	0.47649	0.532778	0.507568	0.51138	0.008165	0.012249
163	0.479694	0.530703	0.50886	0.51327	0.011371	0.01369
164	0.477771	0.534098	0.50732	0.514002	0.012083	0.009516
165	0.468724	0.525509	0.506715	0.514181	0.009408	0.007696
166	0.478298	0.535021	0.506134	0.518804	0.012239	0.013506
167	0.476996	0.530446	0.510251	0.515754	0.01174	0.012205
168	0.477692	0.533377	0.51041	0.517725	0.010759	0.011852
169	0.472622	0.526242	0.502828	0.506398	0.009435	0.003765
170	0.47339	0.529382	0.504561	0.51296	0.010995	0.013174
171	0.470444	0.525589	0.50204	0.507597	0.002469	0.011566
172	0.475052	0.530209	0.502573	0.507776	0.013154	0.011369
173	0.473305	0.524311	0.504377	0.510682	0.010151	0.012052
174	0.472503	0.526322	0.508626	0.506876	0.012567	0.006893
175	0.477058	0.528603	0.508541	0.509079	0.012067	0.014735
176	0.474204	0.527678	0.50272	0.510635	0.015806	0.014246
177	0.468648	0.528557	0.503881	0.507959	0.01698	0.011531
178	0.471913	0.524788	0.503126	0.507005	0.009261	0.007384
179	0.47432	0.529467	0.501058	0.506812	0.009906	0.010015
180	0.469572	0.519666	0.502754	0.503049	0.009342	0.007802
181	0.470006	0.524852	0.497112	0.501874	0.010169	0.0081
182	0.474658	0.528552	0.50195	0.508935	0.014459	0.010128
183	0.463426	0.523169	0.49865	0.50141	0.012352	0.012898
184	0.469619	0.525556	0.497985	0.508254	0.011081	0.008855
185	0.462838	0.523837	0.496501	0.506274	0.010019	0.006547
186	0.466131	0.524291	0.497454	0.5017	0.010594	0.010107
187	0.469712	0.525334	0.49988	0.503909	0.015243	0.013011
188	0.4646	0.524572	0.498681	0.501898	0.010059	0.010982
189	0.467916	0.519473	0.499789	0.504676	0.009438	0.010256
190	0.47133	0.524253	0.507298	0.505395	0.016183	0.015749
191	0.465312	0.520896	0.500168	0.500852	0.00919	0.009903
192	0.46233	0.514823	0.489573	0.497104	0.000307	0.004842
193	0.462433	0.520845	0.499251	0.504471	0.010046	0.01301
194	0.467213	0.523458	0.504073	0.506505	0.012435	0.01334
195	0.461672	0.522947	0.495896	0.504824	0.007513	0.007001
196	0.461473	0.520535	0.499581	0.506782	0.007379	0.007651
197	0.458889	0.521146	0.497114	0.50109	0.009603	0.01109
198	0.457645	0.518289	0.493729	0.502149	0.006276	0.01192
199	0.463905	0.517713	0.499278	0.500829	0.008462	0.012033
200	0.460511	0.523173	0.49861	0.506383	0.01018	0.015553

## Sheet: Fig 2b 3A3 IgG Source Data
BLI Response (nm) after 3A3 IgG coupled biosensors are exposed to a series of solutions
	HexaPro-Buffer-ACE2		HexaPro-Buffer-Buffer		Buffer-Buffer-Buffer
Time (s)	replicate 1	replicate 2	replicate 1	replicate 2	replicate 1	replicate 2
Move biosensors to:	HexaPro		HexaPro		Buffer
0	-3e-06	-1e-06	1e-06	2e-06	3e-06	-4e-06
3	-0.00613	0.012233	-0.00131	-0.00341	-0.01054	-0.01215
6	0.051921	0.059577	0.047303	0.04545	-0.00519	-0.00874
9	0.098271	0.099684	0.093147	0.088726	-0.0013	-0.00973
12	0.13515	0.138284	0.129062	0.124125	-0.01137	-0.01705
15	0.184535	0.18641	0.170067	0.17488	-0.00951	-0.01094
18	0.228009	0.230137	0.213939	0.214079	-0.01254	-0.01259
21	0.273484	0.268108	0.252677	0.256228	-0.00561	-0.00923
24	0.315887	0.308123	0.287317	0.293545	-0.01177	-0.01186
27	0.357247	0.344862	0.322987	0.333152	-0.00643	-0.01172
30	0.394299	0.382458	0.364331	0.365057	-0.0117	-0.00993
33	0.434877	0.417405	0.399074	0.402098	-0.0035	-0.00952
36	0.466235	0.452916	0.425725	0.434754	-0.00875	-0.01219
39	0.498573	0.481989	0.46472	0.469351	-0.00792	-0.00987
42	0.535287	0.519393	0.494979	0.50365	-0.00612	-0.0111
45	0.561422	0.548848	0.519272	0.529517	-0.01227	-0.01413
48	0.584826	0.570573	0.547825	0.560303	-0.01314	-0.01516
51	0.618255	0.600671	0.576117	0.583344	-0.00661	-0.0121
Move biosensors to:	Buffer		Buffer		Buffer
54	0.637355	0.622903	0.596287	0.605273	-0.01466	-0.01829
57	0.700375	0.693989	0.669991	0.684516	-0.00964	-0.0107
60	0.701355	0.694791	0.66756	0.677611	-0.01016	-0.01439
63	0.696397	0.686204	0.663945	0.675575	-0.01299	-0.01676
66	0.696497	0.688212	0.665185	0.674792	-0.0109	-0.01848
69	0.699845	0.690767	0.667816	0.678544	-0.00592	-0.01102
72	0.70321	0.686685	0.665312	0.676899	-0.00714	-0.00955
75	0.695207	0.689963	0.661128	0.674139	-0.00415	-0.01703
78	0.690709	0.685686	0.660225	0.670177	-0.01095	-0.01564
81	0.696429	0.684646	0.663781	0.675574	-0.00659	-0.00964
84	0.69247	0.681989	0.659866	0.670108	-0.01271	-0.01731
Move biosensors to:	ACE2		Buffer		Buffer
87	0.716298	0.70764	0.677103	0.680253	0.008317	0.010211
90	0.720797	0.713435	0.679137	0.674948	0.011493	0.009831
93	0.735049	0.724122	0.672943	0.676031	0.013093	0.008087
96	0.745448	0.73231	0.678369	0.677647	0.009698	0.008095
99	0.752745	0.744644	0.674145	0.677496	0.014774	0.01139
102	0.757045	0.74853	0.669098	0.671116	0.012265	0.008304
105	0.764125	0.751071	0.672814	0.67713	0.015597	0.012916
108	0.769111	0.761011	0.671005	0.671284	0.015109	0.010894
111	0.77097	0.764361	0.668739	0.672497	0.00974	0.011509
114	0.783051	0.778114	0.672721	0.673169	0.015781	0.013156
117	0.780525	0.772865	0.663267	0.668194	0.010115	0.009957
120	0.79215	0.781263	0.671778	0.675559	0.016945	0.017096
123	0.793185	0.784824	0.668631	0.671668	0.015877	0.013026
126	0.799766	0.793996	0.670223	0.671596	0.020401	0.022066
129	0.795824	0.790475	0.665449	0.664304	0.012307	0.01525
132	0.804473	0.795615	0.66367	0.669291	0.018809	0.013422
135	0.807089	0.801633	0.671187	0.665413	0.016147	0.018232
138	0.806128	0.795748	0.661983	0.660995	0.013166	0.011065
141	0.810937	0.801127	0.658816	0.667456	0.017098	0.015846
144	0.814237	0.807281	0.660843	0.662995	0.014313	0.014215
147	0.813691	0.807061	0.658382	0.662897	0.016312	0.011015
150	0.823251	0.811517	0.663432	0.665117	0.019042	0.01544
153	0.825312	0.813995	0.66393	0.665294	0.025688	0.019003
156	0.828637	0.816963	0.662305	0.662466	0.022986	0.01756
159	0.828385	0.816464	0.659097	0.660383	0.018601	0.017735
162	0.831708	0.820819	0.660911	0.665003	0.027682	0.01885
165	0.83273	0.829251	0.661031	0.664894	0.022154	0.021904
168	0.835135	0.821676	0.657241	0.661325	0.020144	0.016002
171	0.837497	0.827346	0.657296	0.660589	0.017439	0.020364
174	0.835581	0.83341	0.66003	0.661029	0.024347	0.022309
177	0.836965	0.830784	0.657622	0.662475	0.027788	0.022698
180	0.836988	0.828955	0.650986	0.656949	0.026482	0.018876
183	0.837	0.832819	0.657279	0.657302	0.025542	0.017389
186	0.841046	0.831333	0.656458	0.659348	0.024665	0.023797
189	0.848318	0.835599	0.659755	0.65925	0.028911	0.025122
192	0.847695	0.838362	0.658207	0.659753	0.02785	0.029346
195	0.849194	0.838594	0.652688	0.657968	0.02246	0.022442
198	0.846181	0.838007	0.654909	0.654725	0.026176	0.021019

## Sheet: Fig 2c Source Data
BLI Response (nm) after antibody-coupled biosensors are exposed to HexaPro or "closed" HexaPro
Time (s)	3A3 IgG coupled biosensors				mAb 2-4 coupled biosensors
Move biosensors to:	HexaPro		"closed" HexaPro		HexaPro		"closed" HexaPro
0	-4e-06	-5e-06	-1e-06	0	0	3e-06	3e-06	4e-06
1	0.004496	0.007923	0.002884	0.005166	-0.00118	0.000826	0.001959	0.001537
2	0.025389	0.019781	0.004315	0.001685	0.021618	0.007586	0.002515	-0.00508
3	0.039131	0.0448	0.001824	0.000313	0.056981	0.042484	0.007738	0.00709
4	0.065296	0.07039	0.006192	0.001142	0.09254	0.080219	0.023609	0.01339
5	0.087658	0.092658	0.005775	0.008326	0.12546	0.111857	0.026179	0.024456
6	0.111174	0.113149	0.009479	0.004593	0.154253	0.146708	0.034375	0.032411
7	0.13396	0.135687	0.009605	0.013069	0.187379	0.178061	0.041078	0.041482
8	0.154175	0.161155	0.01146	0.010242	0.217987	0.206293	0.053267	0.046545
9	0.179087	0.179772	0.012474	0.008963	0.243164	0.229988	0.06082	0.065888
10	0.202362	0.200237	0.011054	0.012783	0.266806	0.259572	0.072926	0.069638
11	0.21903	0.219772	0.012909	0.013904	0.29726	0.279448	0.077251	0.080052
12	0.240433	0.240262	0.010362	0.012881	0.317336	0.309095	0.085665	0.085656
13	0.260737	0.257174	0.011768	0.016142	0.34348	0.32876	0.095753	0.091321
14	0.280963	0.270327	0.010573	0.014975	0.363893	0.35058	0.101807	0.101701
15	0.299417	0.295174	0.00955	0.012239	0.379746	0.371784	0.109157	0.110225
16	0.313328	0.30904	0.009392	0.016414	0.398962	0.390241	0.115773	0.117389
17	0.332775	0.33071	0.013738	0.015357	0.419358	0.411042	0.122531	0.123679
18	0.353254	0.344743	0.012325	0.014944	0.436164	0.430164	0.129628	0.130226
19	0.373072	0.360111	0.013496	0.015522	0.455119	0.447293	0.133808	0.136819
20	0.389028	0.379781	0.013354	0.017204	0.470217	0.462872	0.140622	0.146647
21	0.40284	0.396469	0.014228	0.016109	0.483467	0.477741	0.149928	0.15265
22	0.416012	0.405222	0.013225	0.017465	0.497034	0.489575	0.154061	0.15911
23	0.430959	0.421717	0.013984	0.011031	0.515472	0.504542	0.16236	0.165741
24	0.447989	0.437383	0.013812	0.013777	0.520195	0.515871	0.168587	0.170761
25	0.460672	0.448683	0.014875	0.011459	0.537961	0.530045	0.175127	0.180151
26	0.471647	0.467022	0.014914	0.014565	0.549353	0.538316	0.183581	0.1857
27	0.484635	0.476888	0.016273	0.016787	0.556829	0.553454	0.185533	0.194771
28	0.502086	0.490208	0.012218	0.0163	0.568251	0.563575	0.190951	0.195509
29	0.51356	0.499131	0.014944	0.016111	0.5849	0.575804	0.197263	0.203385
30	0.523792	0.512971	0.01571	0.016903	0.593707	0.588448	0.20467	0.213416
31	0.533004	0.52616	0.015897	0.01522	0.60265	0.596046	0.204828	0.216672
32	0.541666	0.53789	0.014354	0.017527	0.610237	0.607705	0.215852	0.21989
33	0.55705	0.543111	0.013546	0.016099	0.619113	0.614497	0.221011	0.227076
34	0.566818	0.553899	0.016665	0.016101	0.63347	0.625399	0.226781	0.236428
35	0.575248	0.567863	0.017513	0.01946	0.638283	0.630102	0.229538	0.23899
36	0.584491	0.574306	0.02471	0.015951	0.64256	0.638121	0.23712	0.249017
37	0.597974	0.588295	0.017096	0.01853	0.657381	0.651791	0.245388	0.250032
38	0.607004	0.596252	0.018248	0.016458	0.664255	0.658463	0.249537	0.256001
39	0.620666	0.603393	0.022018	0.017606	0.672009	0.66343	0.248741	0.2594
40	0.622809	0.614379	0.018889	0.015863	0.673711	0.673721	0.254655	0.271848
41	0.633429	0.627761	0.018698	0.019143	0.680907	0.677561	0.262648	0.273158
42	0.643702	0.628697	0.016588	0.018639	0.687884	0.685137	0.26814	0.279033
43	0.6517	0.636712	0.016235	0.017326	0.701175	0.692	0.270319	0.278365
44	0.66141	0.643983	0.016508	0.017634	0.700598	0.697505	0.278862	0.284624
45	0.666747	0.651464	0.017226	0.017674	0.707153	0.698051	0.27664	0.294444
46	0.670692	0.662594	0.013878	0.022969	0.711974	0.70447	0.283708	0.298766
47	0.681999	0.671417	0.019135	0.019716	0.718482	0.714211	0.289435	0.300451
48	0.685239	0.679374	0.015649	0.020131	0.719278	0.721652	0.295925	0.303375
49	0.692946	0.68279	0.022534	0.017977	0.727588	0.727759	0.301257	0.311381
50	0.703553	0.685789	0.02035	0.021566	0.735156	0.727505	0.302209	0.315362
51	0.709357	0.696368	0.020076	0.017956	0.738423	0.733741	0.306836	0.318508
52	0.714397	0.703043	0.019123	0.021885	0.743381	0.741184	0.310729	0.328047
53	0.716326	0.709417	0.018311	0.020186	0.748973	0.745697	0.313126	0.324479
54	0.721017	0.71007	0.016627	0.01956	0.750303	0.749164	0.31644	0.331311
55	0.730041	0.720669	0.020347	0.01661	0.751518	0.757505	0.324002	0.334774
56	0.733599	0.725743	0.02157	0.016376	0.763303	0.759561	0.329348	0.344293
57	0.739784	0.730881	0.020694	0.022215	0.765011	0.760991	0.328656	0.343178
58	0.746164	0.738363	0.01742	0.021241	0.772948	0.762809	0.336688	0.352133
59	0.75021	0.742136	0.019987	0.018058	0.770199	0.767878	0.338494	0.356573
60	0.758887	0.742834	0.020394	0.019232	0.777788	0.771012	0.344002	0.357977
61	0.760661	0.74676	0.019196	0.016147	0.779923	0.780695	0.343763	0.361177
62	0.765845	0.755458	0.017716	0.019622	0.784795	0.786413	0.352076	0.367276
63	0.771726	0.759016	0.021393	0.018075	0.7865	0.787616	0.350941	0.371915
64	0.779133	0.76487	0.015745	0.017058	0.796383	0.788332	0.35957	0.374835
65	0.780533	0.770084	0.019218	0.019768	0.797277	0.791595	0.364317	0.376062
66	0.781984	0.769939	0.017155	0.018087	0.803821	0.79621	0.364659	0.381533
67	0.788037	0.77624	0.017781	0.021538	0.803857	0.797658	0.370697	0.384724
68	0.793558	0.785105	0.022572	0.019844	0.806368	0.803947	0.369728	0.387069
69	0.799374	0.789174	0.019172	0.018696	0.806866	0.80255	0.377724	0.394893
70	0.803157	0.786669	0.017704	0.02152	0.81187	0.809066	0.381409	0.399175
71	0.805422	0.793287	0.019002	0.019509	0.815886	0.813661	0.382398	0.397865
72	0.811334	0.799302	0.022753	0.016801	0.816052	0.818981	0.390557	0.401934
73	0.811685	0.804064	0.016432	0.02184	0.820241	0.820903	0.391601	0.408187
74	0.818617	0.804648	0.018828	0.017295	0.823337	0.823793	0.392786	0.409689
75	0.824189	0.808661	0.01873	0.018931	0.828966	0.824685	0.398624	0.411332
76	0.825392	0.81559	0.019713	0.018945	0.833585	0.829546	0.403076	0.422717
77	0.825387	0.816462	0.017997	0.022634	0.83218	0.829119	0.406379	0.4218
78	0.834776	0.822503	0.019629	0.022658	0.832676	0.826566	0.407662	0.423375
79	0.84098	0.826265	0.021715	0.021671	0.83377	0.837888	0.414764	0.426125
80	0.838722	0.827237	0.023278	0.022263	0.84025	0.840047	0.411363	0.433781
81	0.845587	0.832087	0.018715	0.024223	0.844125	0.837336	0.414517	0.431291
82	0.848497	0.836764	0.018024	0.01717	0.844183	0.840449	0.420887	0.436676
83	0.85008	0.838327	0.015985	0.018744	0.845929	0.843804	0.423651	0.441906
84	0.851171	0.843006	0.018917	0.015432	0.849362	0.84559	0.429318	0.442416
85	0.861533	0.844452	0.021005	0.020408	0.850805	0.846228	0.430527	0.44925
86	0.858705	0.850019	0.025556	0.018667	0.857371	0.849175	0.4322	0.452249
87	0.859842	0.852725	0.020119	0.017983	0.858169	0.853319	0.437428	0.455356
88	0.86601	0.852743	0.016951	0.024966	0.857291	0.85562	0.439388	0.455072
89	0.867961	0.858057	0.019982	0.022288	0.858579	0.85878	0.44242	0.459861
90	0.873254	0.858098	0.022056	0.020136	0.863208	0.860449	0.440516	0.464703
91	0.876532	0.859954	0.020844	0.016454	0.864673	0.860354	0.450193	0.469463
92	0.87919	0.865783	0.017542	0.01545	0.865445	0.863254	0.44622	0.469587
93	0.879821	0.866291	0.019698	0.022498	0.868961	0.866468	0.451556	0.468952
94	0.883053	0.870645	0.016545	0.020472	0.870932	0.868595	0.460356	0.472122
95	0.887258	0.876075	0.019543	0.021499	0.871256	0.866848	0.457867	0.473408
96	0.894205	0.875096	0.017089	0.021888	0.876353	0.872284	0.453189	0.481731
97	0.885417	0.882808	0.019666	0.02272	0.874099	0.87343	0.466179	0.481527
98	0.895336	0.882371	0.021044	0.019716	0.875308	0.874547	0.465553	0.480944
99	0.896697	0.884237	0.021568	0.019728	0.882584	0.878906	0.467451	0.488264
100	0.89722	0.883939	0.020798	0.01645	0.881782	0.87967	0.466274	0.491107
101	0.902517	0.890541	0.019048	0.021184	0.88343	0.880676	0.470566	0.493377
102	0.905772	0.892104	0.015706	0.021316	0.885998	0.880101	0.478255	0.496777
103	0.905357	0.893091	0.021312	0.017601	0.887048	0.883625	0.478932	0.501601
104	0.90983	0.896571	0.016231	0.01743	0.889329	0.888417	0.479495	0.503514
105	0.909972	0.900735	0.020566	0.018471	0.89253	0.889862	0.482444	0.501619
106	0.913283	0.903179	0.01994	0.020898	0.895397	0.892397	0.487205	0.506744
107	0.915622	0.902626	0.021754	0.019731	0.894343	0.888276	0.485175	0.508425
108	0.915195	0.909203	0.016784	0.020005	0.898765	0.896475	0.491383	0.51535
109	0.922645	0.908053	0.016594	0.02168	0.896459	0.900466	0.494416	0.511657
110	0.926407	0.907414	0.018727	0.018976	0.898461	0.897212	0.492906	0.52042
111	0.926096	0.912551	0.01656	0.015669	0.902397	0.895636	0.497164	0.518577
112	0.927665	0.920028	0.017985	0.018602	0.898297	0.903366	0.500935	0.524669
113	0.929509	0.917231	0.020648	0.021593	0.904401	0.897441	0.500804	0.524818
114	0.929854	0.918891	0.016977	0.022837	0.909428	0.905067	0.504591	0.527874
115	0.934888	0.924034	0.018001	0.018882	0.911615	0.901138	0.507967	0.530866
116	0.938682	0.926917	0.016964	0.020269	0.910133	0.906206	0.512269	0.533789
117	0.940277	0.925772	0.020434	0.019836	0.908187	0.907287	0.514963	0.538118
118	0.939444	0.928139	0.018132	0.017182	0.910504	0.906572	0.511341	0.538059
119	0.943558	0.930435	0.015484	0.023128	0.914802	0.907538	0.516598	0.535953
120	0.948662	0.935706	0.020092	0.021652	0.914017	0.909598	0.520168	0.54099
121	0.950973	0.937976	0.017621	0.01797	0.913546	0.909742	0.518294	0.545505
122	0.954384	0.937382	0.02005	0.017026	0.914593	0.913487	0.521094	0.544752
123	0.949839	0.942581	0.015136	0.02331	0.920579	0.915385	0.528988	0.547208
124	0.951812	0.941288	0.019448	0.021604	0.921946	0.912069	0.527221	0.54966
125	0.952863	0.943192	0.019934	0.017077	0.922078	0.917766	0.527372	0.553332
126	0.956763	0.946943	0.016948	0.02637	0.920696	0.91959	0.530483	0.557229
127	0.955596	0.950267	0.020659	0.018623	0.922977	0.919829	0.530836	0.562793
128	0.954972	0.947653	0.016761	0.022454	0.92315	0.921247	0.534706	0.558282
129	0.962733	0.949228	0.021451	0.020213	0.928849	0.922823	0.538156	0.557876
130	0.967704	0.955886	0.02005	0.021734	0.927915	0.924297	0.538739	0.56939
131	0.971152	0.951976	0.018363	0.020194	0.927842	0.921851	0.538488	0.564749
132	0.971599	0.956569	0.019126	0.024316	0.927534	0.926363	0.544978	0.564334
133	0.972978	0.959825	0.019492	0.018693	0.934156	0.928753	0.545796	0.570117
134	0.974715	0.962147	0.020097	0.022625	0.93489	0.925914	0.543017	0.565997
135	0.976469	0.962955	0.016759	0.016665	0.934005	0.931079	0.55129	0.576565
136	0.977435	0.965597	0.017324	0.018808	0.929037	0.930623	0.548207	0.574888
137	0.974769	0.962181	0.020824	0.01881	0.936081	0.924689	0.554336	0.579174
138	0.976738	0.970511	0.020685	0.019543	0.934065	0.933658	0.557028	0.578724
139	0.981693	0.965761	0.01828	0.013744	0.936628	0.931473	0.556516	0.58027
140	0.983156	0.97042	0.018876	0.023055	0.93419	0.936237	0.559243	0.580739
141	0.985308	0.969884	0.020162	0.020502	0.936308	0.934354	0.556835	0.587757
142	0.988851	0.974483	0.02184	0.016397	0.936028	0.93576	0.561352	0.592313
143	0.987047	0.974476	0.01947	0.022441	0.939572	0.937218	0.562593	0.591933
144	0.988909	0.975962	0.017786	0.020783	0.941392	0.936078	0.569296	0.592208
145	0.997241	0.974814	0.019957	0.022077	0.942538	0.941804	0.568031	0.592782
146	0.993792	0.982375	0.022038	0.020806	0.940009	0.939367	0.57119	0.593808
147	0.994257	0.981123	0.016096	0.018423	0.944816	0.94085	0.572836	0.595421
148	0.99724	0.979932	0.01552	0.020664	0.944263	0.940273	0.574044	0.599147
149	1.00178	0.987494	0.01847	0.017188	0.945207	0.94442	0.573156	0.60245
150	1.00171	0.984705	0.019564	0.020492	0.94944	0.947115	0.57591	0.602719
151	0.998631	0.985347	0.017615	0.021179	0.951097	0.947256	0.576829	0.599815
152	1.00213	0.988309	0.01494	0.020119	0.950807	0.949155	0.577659	0.608573
153	1.01098	0.989437	0.018468	0.020734	0.950481	0.953366	0.579139	0.609791
154	1.0069	0.993259	0.018956	0.021132	0.9491	0.946473	0.585581	0.612603
155	1.00906	0.999304	0.022573	0.0212	0.951781	0.948765	0.585816	0.616547
156	1.00598	0.993346	0.020531	0.019228	0.952242	0.949586	0.586875	0.614499
157	1.01436	0.997284	0.017711	0.021394	0.956818	0.944525	0.586575	0.615422
158	1.01424	0.995483	0.018979	0.01911	0.953629	0.950697	0.588825	0.620968
159	1.01519	1.00397	0.015898	0.021032	0.960464	0.954501	0.59008	0.621701
160	1.01719	1.00192	0.017241	0.019238	0.955652	0.956227	0.595894	0.62615
161	1.01051	1.00343	0.019464	0.019354	0.955617	0.9552	0.596965	0.622078
162	1.01523	1.00528	0.022779	0.023755	0.962251	0.958958	0.595972	0.622755
163	1.02432	1.00314	0.014339	0.020695	0.96045	0.958827	0.597691	0.626831
164	1.0198	1.00485	0.018772	0.01886	0.957947	0.955123	0.59965	0.623533
165	1.01948	1.00932	0.017641	0.017731	0.95683	0.95565	0.600166	0.627975
166	1.02598	1.009	0.017897	0.022001	0.961547	0.957652	0.599294	0.632941
167	1.0244	1.01093	0.018332	0.021278	0.96144	0.959768	0.601722	0.630362
168	1.02666	1.01258	0.018178	0.022992	0.96194	0.957667	0.607319	0.633001
169	1.02642	1.01346	0.022689	0.024799	0.96335	0.960841	0.606878	0.636352
170	1.03184	1.0125	0.015363	0.018338	0.961868	0.964148	0.605258	0.63989
171	1.02793	1.01889	0.021651	0.023942	0.96327	0.963974	0.609066	0.640443
172	1.02684	1.01563	0.023892	0.021311	0.964196	0.962925	0.613529	0.638477
173	1.02992	1.0215	0.023411	0.019552	0.969516	0.962977	0.613728	0.638834
174	1.03526	1.02007	0.018929	0.020073	0.968721	0.968052	0.612728	0.644909
175	1.04049	1.02239	0.017426	0.018961	0.966435	0.963061	0.614273	0.643977
176	1.03491	1.02604	0.022863	0.022763	0.973155	0.969778	0.612724	0.650333
177	1.0363	1.02659	0.018793	0.023377	0.970402	0.965829	0.620232	0.648734
178	1.04122	1.02576	0.024352	0.020824	0.970483	0.967391	0.619003	0.647478
179	1.04416	1.02622	0.02436	0.01848	0.972087	0.967688	0.623121	0.648406
180	1.04522	1.02978	0.021343	0.022162	0.970507	0.971279	0.622449	0.656131
181	1.04753	1.02606	0.017533	0.021235	0.976894	0.970798	0.623143	0.654405
182	1.04262	1.0298	0.020748	0.020101	0.972026	0.976938	0.625376	0.650688
183	1.04396	1.03345	0.021295	0.024207	0.97524	0.97335	0.629189	0.658298
184	1.04895	1.03337	0.016629	0.02099	0.977745	0.973105	0.633032	0.661025
185	1.05625	1.03577	0.020145	0.020932	0.973563	0.973603	0.629738	0.656775
186	1.04972	1.03559	0.020518	0.021561	0.978221	0.977117	0.632839	0.661636
187	1.05279	1.04136	0.02245	0.02279	0.977102	0.973331	0.634381	0.661236
188	1.04828	1.04017	0.016634	0.018815	0.981772	0.972717	0.637975	0.664344
189	1.05745	1.03561	0.020749	0.02047	0.979725	0.973781	0.634969	0.665431
190	1.05348	1.03899	0.017884	0.01814	0.982769	0.972808	0.637029	0.665419
191	1.05578	1.03699	0.022024	0.018344	0.979623	0.983104	0.637175	0.670524
192	1.05693	1.04034	0.017553	0.022725	0.978593	0.982303	0.639116	0.666435
193	1.06108	1.04281	0.021105	0.023081	0.984212	0.978786	0.641536	0.669104
194	1.05995	1.04675	0.016101	0.023237	0.984143	0.977301	0.641217	0.677444
195	1.06311	1.04678	0.01852	0.019453	0.9849	0.983475	0.643953	0.676344
196	1.06254	1.04705	0.01953	0.022585	0.98847	0.982499	0.643296	0.6719
197	1.06301	1.05002	0.01755	0.022537	0.984025	0.982752	0.64726	0.675742
198	1.06267	1.05182	0.022675	0.01942	0.98549	0.983957	0.644229	0.675479
199	1.07239	1.0536	0.022862	0.019393	0.989778	0.983853	0.649065	0.679261
200	1.06388	1.05191	0.019919	0.02168	0.986469	0.98552	0.651792	0.681669
201	1.06768	1.0512	0.022338	0.025492	0.985789	0.98279	0.651064	0.678703
202	1.07361	1.05594	0.017539	0.018967	0.989034	0.983769	0.655511	0.680927
203	1.06999	1.05112	0.020473	0.019703	0.986546	0.986369	0.654357	0.67956
204	1.07089	1.05543	0.019343	0.023254	0.99091	0.987537	0.65611	0.685242
205	1.07239	1.05555	0.019805	0.02276	0.9888	0.984594	0.654422	0.689166
206	1.07655	1.05663	0.023741	0.019457	0.99188	0.991407	0.654012	0.690045
207	1.07686	1.05695	0.021845	0.022363	0.987947	0.9912	0.657901	0.685346
208	1.07825	1.06076	0.022643	0.024688	0.989785	0.990051	0.658175	0.69135
209	1.07342	1.05981	0.016329	0.018276	0.990994	0.990281	0.659283	0.690601
210	1.08093	1.06322	0.023369	0.02364	0.992739	0.990858	0.659751	0.689069
211	1.08131	1.06135	0.024765	0.024262	0.992802	0.989619	0.657988	0.69511
212	1.07726	1.06114	0.018884	0.022858	0.991219	0.98707	0.661253	0.693134
213	1.08287	1.06306	0.020531	0.025807	0.994656	0.995322	0.666961	0.695416
214	1.08394	1.06779	0.0183	0.020137	1.00082	0.992662	0.668417	0.69538
215	1.08703	1.06762	0.019053	0.025741	0.999394	0.994187	0.663817	0.698413
216	1.08422	1.06574	0.019649	0.021078	0.995564	0.995773	0.664993	0.696492
217	1.08179	1.06954	0.021907	0.024857	0.996809	0.999012	0.66934	0.700951
218	1.08425	1.0725	0.021567	0.023703	0.993543	0.993015	0.673621	0.703892
219	1.09007	1.07186	0.024382	0.019086	0.999637	0.997735	0.671683	0.704713
220	1.08613	1.06984	0.018147	0.020448	1.00372	0.993084	0.672077	0.701183
221	1.08688	1.07599	0.0205	0.018026	0.997525	0.997122	0.675467	0.703135
222	1.0855	1.07115	0.020495	0.023098	0.999905	0.997259	0.675887	0.704894
223	1.08784	1.07752	0.017906	0.025428	0.997139	0.997667	0.677777	0.70458
224	1.09524	1.07777	0.018397	0.022453	1.0019	0.998294	0.679243	0.708577
225	1.09191	1.07451	0.02327	0.023815	1.00247	1.00082	0.680406	0.70676
226	1.09059	1.07544	0.022187	0.025783	0.9993	0.997661	0.678499	0.709938
227	1.10045	1.08055	0.021768	0.022698	1.00817	0.998611	0.681004	0.707274
228	1.0982	1.08477	0.018843	0.021356	1.00601	0.994551	0.68205	0.717206
229	1.09485	1.0778	0.021106	0.02155	1.00036	0.998489	0.685584	0.713413
230	1.09945	1.08493	0.023177	0.024046	1.00503	1.00017	0.68702	0.717495
231	1.09511	1.08119	0.017699	0.018964	1.00493	1.00224	0.685897	0.71675
232	1.10104	1.08009	0.024887	0.024249	1.00412	1.00228	0.685453	0.716062
233	1.09945	1.08692	0.022463	0.023796	1.00581	1.00457	0.68735	0.717267
234	1.1081	1.08681	0.021024	0.025359	1.00581	1.00052	0.688956	0.717274
235	1.10465	1.08612	0.023228	0.02483	1.00637	1.00541	0.69052	0.72006
236	1.10422	1.07927	0.020195	0.017474	1.01052	1.00543	0.689524	0.721461
237	1.10881	1.08704	0.021765	0.021355	1.00502	1.00808	0.690111	0.724525
238	1.10416	1.09116	0.019475	0.024838	1.01056	1.00481	0.690949	0.721623
239	1.10963	1.09286	0.022555	0.02672	1.00927	1.00321	0.695679	0.722846
240	1.10601	1.09116	0.021003	0.025207	1.00994	1.00402	0.697758	0.728024
241	1.11135	1.09358	0.019546	0.021073	1.00293	1.00658	0.697915	0.723986
242	1.10984	1.09156	0.021096	0.025287	1.00938	1.00896	0.69652	0.728084
243	1.11273	1.098	0.019705	0.024341	1.0075	1.00856	0.698592	0.72722
244	1.11287	1.09326	0.02062	0.020419	1.01225	1.00791	0.694987	0.727826
245	1.11512	1.09461	0.014812	0.023344	1.01012	1.01006	0.694777	0.728868
246	1.1141	1.09783	0.02364	0.017365	1.00831	1.00755	0.702804	0.731031
247	1.1158	1.09799	0.020096	0.023198	1.01294	1.01077	0.70277	0.73151
248	1.11553	1.10333	0.021408	0.024217	1.01492	1.01169	0.702118	0.73318
249	1.11593	1.10247	0.020844	0.025073	1.01317	1.01034	0.704374	0.734105
250	1.11707	1.1046	0.020734	0.020189	1.01399	1.00799	0.705224	0.7347
251	1.11444	1.10448	0.022051	0.027619	1.01349	1.0104	0.710428	0.737819
252	1.1221	1.10381	0.019777	0.023119	1.01093	1.01077	0.710118	0.738531
253	1.1152	1.10284	0.019845	0.022741	1.01304	1.01518	0.706664	0.744159
254	1.12217	1.10086	0.021135	0.022728	1.01402	1.01448	0.709405	0.735211
255	1.11976	1.10434	0.020666	0.026585	1.01695	1.01669	0.709992	0.736978
256	1.12605	1.10336	0.015862	0.020661	1.01546	1.01431	0.705898	0.743125
257	1.1261	1.10589	0.017916	0.024837	1.01469	1.01377	0.709409	0.744279
258	1.1221	1.11003	0.018753	0.026895	1.01601	1.01578	0.708631	0.74225
259	1.12456	1.11305	0.021457	0.022696	1.01549	1.014	0.710268	0.743744
260	1.12635	1.10949	0.022634	0.024472	1.02128	1.01761	0.71339	0.742579
261	1.12485	1.10894	0.021107	0.025304	1.01758	1.01492	0.710294	0.746847
262	1.13092	1.10966	0.020265	0.021777	1.01913	1.01683	0.715482	0.747367
263	1.12705	1.11228	0.023431	0.026551	1.02021	1.01456	0.710151	0.751487
264	1.13356	1.11634	0.019627	0.025622	1.01842	1.01934	0.714721	0.748671
265	1.12773	1.11456	0.026188	0.023553	1.0188	1.019	0.718777	0.747509
266	1.12996	1.11027	0.018831	0.021543	1.02093	1.01798	0.722024	0.752968
267	1.13213	1.11389	0.019681	0.024817	1.01916	1.02026	0.719969	0.753657
268	1.13734	1.11444	0.022628	0.024506	1.01803	1.01816	0.721774	0.75586
269	1.13115	1.1153	0.019317	0.021167	1.01905	1.02268	0.721172	0.7521
270	1.1352	1.11624	0.022649	0.023121	1.02269	1.02326	0.714957	0.755168
271	1.13483	1.11988	0.022488	0.024315	1.02083	1.0204	0.722547	0.756066
272	1.13435	1.11843	0.021853	0.024782	1.02392	1.01728	0.725679	0.758851
273	1.13393	1.12188	0.024792	0.020525	1.02223	1.02093	0.720633	0.757309
274	1.13449	1.12156	0.019771	0.020818	1.02204	1.01645	0.723957	0.760328
275	1.141	1.12532	0.01995	0.027756	1.02371	1.02004	0.722615	0.759724
276	1.13994	1.1213	0.0191	0.022776	1.02386	1.01683	0.722286	0.758405
277	1.14326	1.12236	0.020187	0.018981	1.028	1.02086	0.727462	0.762948
278	1.13913	1.12242	0.019334	0.019702	1.02476	1.02476	0.732362	0.76264
279	1.14096	1.1281	0.022152	0.023444	1.02412	1.02204	0.72454	0.762065
280	1.14089	1.12455	0.02165	0.023307	1.02792	1.02368	0.730945	0.762253
281	1.14278	1.12868	0.021707	0.023786	1.02626	1.02586	0.730767	0.769352
282	1.14732	1.12655	0.022478	0.025785	1.02788	1.02583	0.733907	0.767585
283	1.14786	1.12533	0.024576	0.021238	1.02781	1.02309	0.730107	0.761521
284	1.14552	1.12803	0.022623	0.023255	1.02293	1.0253	0.735557	0.764426
285	1.14624	1.12677	0.020283	0.028184	1.02718	1.02896	0.732642	0.766711
286	1.1477	1.13003	0.0217	0.021357	1.02744	1.0314	0.732924	0.770411
287	1.15012	1.13404	0.023678	0.024918	1.03002	1.02875	0.731294	0.76854
288	1.14658	1.13449	0.021325	0.025184	1.02941	1.02759	0.73604	0.764992
289	1.15059	1.13311	0.022032	0.022644	1.02799	1.02794	0.736918	0.774769
290	1.14885	1.13515	0.020373	0.021356	1.03105	1.02367	0.736983	0.771651
291	1.14956	1.13265	0.020258	0.024598	1.03164	1.02895	0.737144	0.774967
292	1.1517	1.13468	0.021948	0.026277	1.03086	1.03013	0.736027	0.769771
293	1.15482	1.13513	0.023638	0.023931	1.0296	1.02747	0.736269	0.77374
294	1.14745	1.13281	0.019563	0.024069	1.03116	1.02486	0.738653	0.768774
295	1.15544	1.13799	0.016503	0.026716	1.029	1.02639	0.740404	0.771284
296	1.15062	1.13948	0.021224	0.022747	1.03072	1.02997	0.746853	0.774203
297	1.15954	1.13866	0.024366	0.028317	1.03477	1.02632	0.742667	0.772327
298	1.15397	1.13882	0.025891	0.026465	1.03404	1.0323	0.74185	0.778805
299	1.15942	1.13791	0.022293	0.02255	1.03549	1.02837	0.743564	0.778043
300	1.15384	1.13762	0.022049	0.025842	1.03384	1.03231	0.740702	0.776436
Move biosensors to:	Buffer		Buffer		Buffer		Buffer
301	1.15952	1.1421	0.021977	0.028017	1.03476	1.03034	0.74654	0.780296
302	1.17237	1.15044	0.03562	0.035732	1.0452	1.0404	0.757121	0.786425
303	1.17241	1.15362	0.033074	0.034223	1.04573	1.03663	0.754924	0.78829
304	1.17532	1.14938	0.028726	0.03188	1.04388	1.04181	0.756611	0.786094
305	1.16991	1.15267	0.027773	0.038621	1.04598	1.03932	0.757247	0.780681
306	1.16976	1.15433	0.026776	0.030553	1.04909	1.03922	0.753627	0.784818
307	1.17081	1.15586	0.0266	0.032948	1.04293	1.03296	0.752856	0.787254
308	1.17141	1.1482	0.026505	0.034172	1.04104	1.03805	0.752203	0.785045
309	1.17034	1.15153	0.029159	0.032529	1.03628	1.03793	0.757615	0.785245
310	1.17243	1.1531	0.024973	0.029022	1.04554	1.03495	0.754303	0.784698
311	1.17193	1.15075	0.024172	0.029	1.0427	1.03359	0.754515	0.783447
312	1.17201	1.14511	0.021942	0.028862	1.04288	1.03428	0.754057	0.786353
313	1.16984	1.15217	0.027523	0.032737	1.03952	1.03303	0.758271	0.782762
314	1.17099	1.14696	0.023319	0.029363	1.0424	1.03303	0.750453	0.787292
315	1.16832	1.15156	0.027208	0.029409	1.04028	1.03326	0.752712	0.785461
316	1.17192	1.15017	0.02441	0.026717	1.03867	1.03666	0.75241	0.780378
317	1.16974	1.14724	0.018159	0.027707	1.04223	1.03026	0.752678	0.781983
318	1.17134	1.15208	0.022923	0.024456	1.03971	1.03282	0.753512	0.785765
319	1.17444	1.15148	0.021042	0.024119	1.04018	1.03135	0.749998	0.782535
320	1.17351	1.14961	0.022296	0.02559	1.03713	1.03217	0.753002	0.785111
321	1.16993	1.15064	0.021532	0.024795	1.03914	1.03716	0.750572	0.785152
322	1.17454	1.14966	0.023739	0.025297	1.0411	1.03248	0.751693	0.779849
323	1.1721	1.15216	0.026219	0.027748	1.04167	1.03279	0.74978	0.78219
324	1.16939	1.14808	0.020343	0.021944	1.03781	1.03226	0.750971	0.784798
325	1.17517	1.15185	0.023466	0.028421	1.03668	1.02975	0.753204	0.78602
326	1.16646	1.14885	0.018124	0.027815	1.03755	1.03191	0.74852	0.781455
327	1.17206	1.14589	0.019807	0.022824	1.04018	1.03537	0.75201	0.783047
328	1.16735	1.15193	0.018051	0.024078	1.03906	1.02868	0.752986	0.783402
329	1.16813	1.15015	0.016935	0.025481	1.039	1.02993	0.749458	0.784309
330	1.17515	1.15259	0.02189	0.021083	1.03698	1.03004	0.749474	0.780225
331	1.16994	1.15231	0.022577	0.025042	1.0334	1.0287	0.747331	0.780738
332	1.17212	1.15068	0.020828	0.022193	1.03605	1.03225	0.749539	0.778938
333	1.17464	1.14629	0.022267	0.024702	1.03578	1.02824	0.755235	0.781984
334	1.16894	1.14774	0.018371	0.022817	1.03842	1.03126	0.749801	0.778099
335	1.17073	1.14864	0.020013	0.020828	1.03615	1.03132	0.748865	0.781057
336	1.17327	1.14731	0.017472	0.0222	1.03507	1.02645	0.748461	0.783342
337	1.17084	1.14896	0.018146	0.018637	1.03908	1.03151	0.75173	0.778124
338	1.17332	1.15036	0.016162	0.019154	1.03362	1.02942	0.748776	0.78156
339	1.17229	1.15261	0.01941	0.01885	1.03495	1.02934	0.75261	0.782723
340	1.17284	1.15179	0.015811	0.023411	1.03789	1.02679	0.749588	0.777466
341	1.17036	1.15425	0.013332	0.02203	1.0362	1.02766	0.749438	0.779225
342	1.17537	1.14629	0.016751	0.022674	1.03234	1.02919	0.748823	0.774988
343	1.17247	1.14616	0.014922	0.023413	1.03422	1.0287	0.749915	0.781588
344	1.17286	1.14918	0.021552	0.02084	1.03838	1.02556	0.748776	0.781555
345	1.17442	1.15025	0.017503	0.018706	1.03177	1.02919	0.748057	0.782044
346	1.17385	1.15268	0.015715	0.019199	1.03476	1.02822	0.750164	0.784317
347	1.17053	1.15421	0.015523	0.020857	1.03326	1.02652	0.749561	0.778575
348	1.17239	1.14958	0.016134	0.016169	1.03566	1.02453	0.747692	0.776926
349	1.17094	1.14862	0.017823	0.023864	1.03373	1.02517	0.749436	0.778413
350	1.17314	1.15018	0.015509	0.015138	1.03413	1.02596	0.752397	0.776587
351	1.17135	1.14966	0.019071	0.025972	1.02657	1.02745	0.751728	0.780298
352	1.17988	1.14853	0.01705	0.020688	1.0335	1.02748	0.74743	0.781047
353	1.17226	1.14935	0.012572	0.019074	1.03129	1.021	0.748993	0.776872
354	1.17429	1.14822	0.0188	0.022773	1.03176	1.02507	0.748794	0.780054
355	1.17436	1.15016	0.017803	0.02093	1.03161	1.0256	0.752255	0.779047
356	1.17281	1.14777	0.016043	0.017941	1.03361	1.02868	0.749884	0.780278
357	1.17138	1.14744	0.015384	0.018486	1.03469	1.02969	0.745245	0.781253
358	1.17027	1.14887	0.014695	0.021846	1.03229	1.02172	0.750103	0.781506
359	1.16926	1.14657	0.01342	0.016388	1.03397	1.0221	0.74453	0.774342
360	1.17279	1.1529	0.013899	0.01506	1.02958	1.02262	0.744284	0.777282
361	1.1709	1.14961	0.016261	0.019151	1.03322	1.02791	0.751162	0.779786
362	1.16594	1.14563	0.014692	0.021296	1.03595	1.02534	0.746725	0.778887
363	1.17099	1.14979	0.014216	0.014904	1.02803	1.02759	0.746121	0.778534
364	1.17254	1.15388	0.015559	0.016496	1.03244	1.02887	0.750832	0.780123
365	1.16998	1.15015	0.013393	0.016232	1.03007	1.02261	0.750816	0.780292
366	1.17177	1.14974	0.014108	0.012865	1.03049	1.02503	0.749833	0.783217
367	1.16952	1.14861	0.012051	0.016653	1.03079	1.02662	0.75038	0.781784
368	1.17128	1.15345	0.015079	0.015799	1.03211	1.0277	0.743599	0.775047
369	1.17291	1.14495	0.01596	0.019713	1.02999	1.02236	0.754031	0.776134
370	1.17404	1.14834	0.01607	0.019485	1.03265	1.02374	0.747619	0.779758
371	1.17418	1.15028	0.010051	0.019084	1.02876	1.02026	0.752608	0.775607
372	1.17082	1.1502	0.013946	0.017537	1.0342	1.02487	0.747586	0.779361
373	1.17469	1.14871	0.010372	0.016976	1.02958	1.02378	0.745939	0.784424
374	1.17277	1.15045	0.016083	0.019756	1.02598	1.02098	0.747159	0.773398
375	1.17122	1.149	0.017967	0.017006	1.0316	1.02521	0.744026	0.778417
376	1.16965	1.15189	0.013817	0.016029	1.03069	1.02284	0.746563	0.778924
377	1.17033	1.1461	0.014796	0.014188	1.03048	1.02467	0.747469	0.774472
378	1.17231	1.14889	0.013035	0.015408	1.03182	1.02451	0.7498	0.775275
379	1.16918	1.1499	0.013389	0.020661	1.03112	1.02207	0.749315	0.773619
380	1.17242	1.14795	0.019182	0.017953	1.03181	1.02635	0.750357	0.780113
381	1.17265	1.14718	0.008468	0.01552	1.03044	1.02309	0.748665	0.779804
382	1.17469	1.14676	0.010939	0.011118	1.02774	1.02393	0.743102	0.779824
383	1.17549	1.14808	0.011532	0.016801	1.02298	1.02122	0.746576	0.781216
384	1.17518	1.14963	0.01298	0.016414	1.02572	1.01916	0.747258	0.775787
385	1.17228	1.15175	0.007742	0.014918	1.02958	1.02176	0.746635	0.779657
386	1.17036	1.15006	0.013644	0.020552	1.03193	1.02114	0.745712	0.779149
387	1.16952	1.14651	0.013274	0.014806	1.02953	1.02259	0.748349	0.777645
388	1.17579	1.15132	0.014222	0.018042	1.03066	1.01971	0.745751	0.77991
389	1.17348	1.14658	0.012745	0.015873	1.0288	1.0239	0.744603	0.774116
390	1.17186	1.14811	0.012702	0.014397	1.02746	1.02079	0.744661	0.778484
391	1.17289	1.14525	0.011475	0.014563	1.02796	1.02354	0.751592	0.774547
392	1.17182	1.14987	0.011427	0.012615	1.03085	1.01939	0.747808	0.781043
393	1.17202	1.14796	0.011504	0.014933	1.02991	1.01871	0.744773	0.780089
394	1.17157	1.14934	0.011794	0.014972	1.02814	1.01931	0.748395	0.780511
395	1.16953	1.14838	0.010357	0.016939	1.03194	1.01903	0.747107	0.77942
396	1.16979	1.14894	0.012728	0.016079	1.02401	1.02358	0.746604	0.778001
397	1.17534	1.15186	0.013346	0.015467	1.02921	1.02565	0.747755	0.781314
398	1.17001	1.14887	0.013616	0.015908	1.02414	1.01906	0.745415	0.778681
399	1.17039	1.15409	0.012472	0.014777	1.02871	1.01667	0.748076	0.7783
400	1.17261	1.1463	0.01124	0.012454	1.03133	1.02149	0.744968	0.780826
401	1.17342	1.14776	0.011513	0.017659	1.02716	1.02583	0.749635	0.777371
402	1.17266	1.14678	0.009544	0.018645	1.02658	1.02072	0.748388	0.778063
403	1.17246	1.14718	0.014985	0.010669	1.02662	1.01941	0.742875	0.776924
404	1.16911	1.14785	0.013627	0.01256	1.02639	1.02328	0.746243	0.774576
405	1.17366	1.15229	0.009852	0.012856	1.02541	1.02059	0.749354	0.775842
406	1.17148	1.14852	0.010048	0.011433	1.02418	1.02133	0.746399	0.775866
407	1.17421	1.14711	0.012082	0.014173	1.02895	1.02118	0.750573	0.779197
408	1.17148	1.14896	0.011132	0.01136	1.02649	1.02005	0.745678	0.779743
409	1.17631	1.15058	0.008957	0.017758	1.02859	1.02286	0.745989	0.781081
410	1.17388	1.15038	0.009113	0.009678	1.03007	1.01778	0.745282	0.777119
411	1.16902	1.14766	0.012219	0.017645	1.0295	1.01945	0.748175	0.77893
412	1.17196	1.15051	0.008524	0.014621	1.02743	1.01907	0.751086	0.775152
413	1.17102	1.15064	0.010799	0.01443	1.02384	1.02248	0.74558	0.77215
414	1.17388	1.14891	0.00916	0.013029	1.02463	1.02033	0.743778	0.780651
415	1.17737	1.15434	0.009912	0.012466	1.03216	1.01374	0.748124	0.779077
416	1.16921	1.15021	0.013273	0.01586	1.02139	1.01814	0.749315	0.77611
417	1.17152	1.14702	0.009572	0.016721	1.02548	1.01833	0.748383	0.776668
418	1.17411	1.14763	0.009853	0.016139	1.02552	1.01663	0.750478	0.781182
419	1.17105	1.15229	0.008705	0.012658	1.02834	1.01837	0.745828	0.779486
420	1.17596	1.14773	0.004687	0.015335	1.02642	1.01652	0.748911	0.779077
421	1.17328	1.15111	0.012519	0.0133	1.0252	1.01809	0.744366	0.778061
422	1.17298	1.15339	0.00987	0.010184	1.0291	1.01651	0.747145	0.778498
423	1.1725	1.15163	0.013441	0.010929	1.0243	1.01457	0.745228	0.779625
424	1.17243	1.15055	0.01201	0.012727	1.0238	1.01686	0.747654	0.776285
425	1.17327	1.1465	0.010275	0.013053	1.02562	1.01629	0.749885	0.780131
426	1.17095	1.15021	0.011978	0.013892	1.02605	1.01704	0.74422	0.775746
427	1.17435	1.14791	0.007357	0.014185	1.02348	1.01785	0.747565	0.778093
428	1.17236	1.14997	0.012132	0.015103	1.02547	1.01687	0.749501	0.775588
429	1.17111	1.15049	0.008698	0.015842	1.02255	1.02074	0.748262	0.775024
430	1.1759	1.15256	0.006969	0.012683	1.02278	1.01707	0.74988	0.780541
431	1.16735	1.14614	0.00962	0.012778	1.02796	1.01696	0.749092	0.777482
432	1.17025	1.14935	0.013014	0.013384	1.03142	1.01249	0.746825	0.779045
433	1.1724	1.14565	0.008923	0.011792	1.0282	1.0185	0.744384	0.779856
434	1.17187	1.14813	0.008245	0.018217	1.02617	1.01621	0.751242	0.78062
435	1.16982	1.14723	0.011364	0.011467	1.02343	1.01954	0.751352	0.778088
436	1.17888	1.14753	0.010374	0.010926	1.02355	1.01698	0.745991	0.780001
437	1.17589	1.15234	0.011671	0.01285	1.0235	1.01275	0.747516	0.772031
438	1.17387	1.14897	0.009834	0.01135	1.02333	1.01353	0.748051	0.780583
439	1.16987	1.15177	0.009524	0.01077	1.02647	1.01655	0.747641	0.780804
440	1.17286	1.15152	0.007934	0.012649	1.02387	1.01421	0.746774	0.775769
441	1.17513	1.14616	0.010603	0.013712	1.02511	1.01817	0.74707	0.777359
442	1.17266	1.15069	0.012928	0.012336	1.02486	1.01275	0.744765	0.774827
443	1.17319	1.14764	0.011529	0.009575	1.02301	1.01934	0.754032	0.782014
444	1.16928	1.15089	0.003832	0.009134	1.0278	1.01427	0.744092	0.777393
445	1.17291	1.1473	0.007026	0.015298	1.02616	1.01688	0.746878	0.775488
446	1.17098	1.14717	0.009004	0.011663	1.02321	1.01882	0.747214	0.776788
447	1.1767	1.14747	0.008772	0.010816	1.02415	1.02065	0.7482	0.775561
448	1.17307	1.14649	0.010767	0.015276	1.02342	1.01407	0.748288	0.773883
449	1.17976	1.14824	0.006553	0.009983	1.02702	1.01502	0.747546	0.777174
450	1.16983	1.1485	0.005222	0.011916	1.0226	1.0163	0.747771	0.777678
451	1.17538	1.15194	0.006394	0.01049	1.02478	1.0137	0.750827	0.774964
452	1.17395	1.15049	0.006679	0.011785	1.02694	1.01469	0.748683	0.772601
453	1.17209	1.1498	0.008952	0.00991	1.01956	1.01607	0.745216	0.772681
454	1.16932	1.15107	0.011578	0.011564	1.02241	1.01775	0.747258	0.778592
455	1.17445	1.15067	0.005033	0.011377	1.01972	1.01907	0.750859	0.777299
456	1.17144	1.1495	0.006368	0.011535	1.02408	1.01231	0.750689	0.778157
457	1.17383	1.15127	0.005226	0.012313	1.02279	1.01777	0.748369	0.778945
458	1.17194	1.14988	0.00638	0.008266	1.0247	1.01397	0.747873	0.778993
459	1.17546	1.14988	0.00667	0.010147	1.02379	1.01071	0.750634	0.783047
460	1.16955	1.15071	0.007141	0.00674	1.02294	1.01808	0.750822	0.777032
461	1.17286	1.14666	0.005336	0.010129	1.02566	1.01747	0.746658	0.779813
462	1.17454	1.14312	0.008831	0.015964	1.01923	1.01341	0.747569	0.773317
463	1.17484	1.14758	0.007045	0.012131	1.02119	1.01375	0.746819	0.781493
464	1.17617	1.14965	0.00649	0.014497	1.02441	1.01639	0.748867	0.777367
465	1.17704	1.14675	0.009603	0.010203	1.02557	1.01705	0.747939	0.782389
466	1.17294	1.14704	0.007526	0.011921	1.02218	1.01524	0.748598	0.77853
467	1.16887	1.14639	0.007289	0.008594	1.02221	1.01725	0.749729	0.780711
468	1.17964	1.14859	0.006157	0.008559	1.01699	1.01188	0.74649	0.778318
469	1.17189	1.14589	0.012292	0.009668	1.02376	1.01604	0.750747	0.775672
470	1.17178	1.14988	0.006912	0.00651	1.02087	1.01456	0.744968	0.781631
471	1.17154	1.14935	0.010567	0.012792	1.02345	1.01582	0.748068	0.777503
472	1.17051	1.15154	0.008673	0.005712	1.02582	1.01149	0.748094	0.777606
473	1.17519	1.15346	0.010977	0.012649	1.02443	1.01493	0.745902	0.776057
474	1.17224	1.14646	0.006339	0.009927	1.01924	1.0135	0.743588	0.777717
475	1.17372	1.14556	0.003467	0.007201	1.02546	1.01329	0.746752	0.77846
476	1.17153	1.14725	0.00721	0.009809	1.02099	1.00933	0.746658	0.776874
477	1.16958	1.15096	0.006498	0.008098	1.01799	1.01487	0.747849	0.77785
478	1.17148	1.14604	0.010315	0.006619	1.02156	1.01317	0.746028	0.7775
479	1.17244	1.15255	0.008536	0.011504	1.01811	1.01164	0.749161	0.774447
480	1.17002	1.15105	0.005233	0.009447	1.02224	1.01349	0.747437	0.777172
481	1.17375	1.15115	0.008732	0.010543	1.01763	1.0126	0.747539	0.779219
482	1.17284	1.14715	0.008659	0.008372	1.02228	1.01587	0.751878	0.77772
483	1.17221	1.14831	0.008765	0.009841	1.02528	1.01085	0.74833	0.777698
484	1.17185	1.14793	0.006773	0.007847	1.01978	1.01172	0.747087	0.776275
485	1.1757	1.15397	0.009927	0.005982	1.02148	1.01301	0.7462	0.781133
486	1.17407	1.15015	0.005664	0.009311	1.02379	1.01276	0.74835	0.778127
487	1.17012	1.14723	0.007953	0.011759	1.02126	1.01402	0.746971	0.778234
488	1.1723	1.15261	0.008486	0.009366	1.01789	1.00809	0.746331	0.774582
489	1.17192	1.1492	0.003955	0.003858	1.02131	1.01337	0.748241	0.77983
490	1.1701	1.15161	0.006348	0.008283	1.02102	1.00901	0.748342	0.778536
491	1.17237	1.14437	0.004487	0.007117	1.02181	1.01413	0.749584	0.775945
492	1.17211	1.15078	0.009366	0.011168	1.01952	1.0092	0.743595	0.776325
493	1.17442	1.14701	0.007391	0.009343	1.0212	1.01252	0.749259	0.775505
494	1.17285	1.14701	0.00689	0.007454	1.01773	1.01422	0.74478	0.778696
495	1.17231	1.15367	0.007171	0.01206	1.02017	1.01597	0.748379	0.780914
496	1.17697	1.15038	0.006302	0.009997	1.01873	1.01373	0.748712	0.77626
497	1.17848	1.15172	0.006715	0.006431	1.01851	1.00814	0.749836	0.777976
498	1.1738	1.14523	0.004719	0.007738	1.02018	1.01042	0.749706	0.777304
499	1.17344	1.14878	0.005514	0.009702	1.01876	1.01459	0.747688	0.780208
500	1.17009	1.15058	0.008986	0.007372	1.02131	1.01085	0.75123	0.779467
501	1.17445	1.14972	0.007197	0.009939	1.02059	1.01193	0.745354	0.781231
502	1.17215	1.1512	0.002149	0.003686	1.02346	1.01141	0.749783	0.778821
503	1.174	1.15277	0.005955	0.013848	1.01856	1.01371	0.748186	0.777291
504	1.17073	1.14852	0.006026	0.009658	1.01869	1.01038	0.747411	0.777856
505	1.16989	1.15006	0.00704	0.009958	1.01759	1.01058	0.748045	0.776078
506	1.17294	1.14912	0.009931	0.010615	1.01669	1.00896	0.751293	0.777475
507	1.1764	1.15281	0.006843	0.01024	1.01747	1.01141	0.746341	0.778965
508	1.17715	1.15206	0.004878	0.007449	1.01679	1.01005	0.749899	0.777903
509	1.17141	1.15145	0.00624	0.009907	1.01811	1.01458	0.747252	0.775742
510	1.16916	1.15023	0.00891	0.014786	1.02117	1.0112	0.75306	0.773935
511	1.17206	1.15348	0.005583	0.009562	1.02112	1.0097	0.751037	0.777912
512	1.16978	1.15085	0.006382	0.009185	1.01774	1.00999	0.747511	0.781431
513	1.17202	1.14912	0.001967	0.007489	1.0178	1.01201	0.748305	0.776092
514	1.16972	1.1501	0.00797	0.011248	1.02279	1.01702	0.747592	0.778237
515	1.17543	1.14628	0.006607	0.008943	1.01965	1.00758	0.747861	0.777499
516	1.17804	1.14983	0.00903	0.008778	1.02479	1.01001	0.747939	0.776518
517	1.1703	1.14782	0.005232	0.013122	1.0225	1.01044	0.750107	0.776713
518	1.1733	1.15024	0.004628	0.009436	1.01717	1.01141	0.750233	0.773032
519	1.17178	1.14612	0.008249	0.009164	1.01783	1.0079	0.748335	0.77957
520	1.16729	1.15202	0.002687	0.00945	1.0201	1.01201	0.752343	0.777794
521	1.17456	1.14975	0.006409	0.011776	1.02063	1.01023	0.74793	0.780576
522	1.17697	1.14827	0.003806	0.009451	1.01561	1.01389	0.748769	0.776315
523	1.17442	1.15229	0.004696	0.008881	1.01995	1.01189	0.747335	0.780296
524	1.17512	1.15023	0.00252	0.014842	1.02214	1.01016	0.746155	0.776225
525	1.17213	1.14737	0.006114	0.010577	1.01812	1.00879	0.748226	0.777286
526	1.17322	1.15218	0.005951	0.007232	1.01962	1.00767	0.751132	0.780005
527	1.17705	1.14645	0.005162	0.007846	1.01466	1.00837	0.743249	0.776185
528	1.17289	1.1495	0.005361	0.012166	1.02062	1.01152	0.74568	0.773458
529	1.17161	1.14833	0.008331	0.008163	1.01621	1.00814	0.74737	0.777008
530	1.17404	1.14566	0.003458	0.013677	1.02079	1.00909	0.750746	0.783254
531	1.1741	1.14707	0.006683	0.007651	1.01876	1.00727	0.750654	0.783165
532	1.17327	1.14893	0.007523	0.008922	1.01639	1.00842	0.755884	0.779819
533	1.17405	1.15024	0.00423	0.012829	1.02124	1.00862	0.746802	0.77699
534	1.17297	1.14703	0.005328	0.007394	1.02064	1.00877	0.748174	0.781665
535	1.1726	1.14851	0.011815	0.009311	1.0128	1.01146	0.750766	0.777009
536	1.17046	1.15188	0.005566	0.00862	1.02012	1.0113	0.750386	0.779189
537	1.17697	1.1486	0.004085	0.012436	1.0196	1.01179	0.749321	0.780497
538	1.17434	1.14826	0.006185	0.004907	1.01928	1.01077	0.748263	0.77671
539	1.1704	1.15004	0.00506	0.007338	1.01827	1.01008	0.746278	0.780352
540	1.17465	1.15028	0.004521	0.00957	1.01693	1.00941	0.749608	0.780792
541	1.17523	1.15425	0.004946	0.009996	1.01867	1.00788	0.748833	0.776387
542	1.17232	1.15332	0.004555	0.007338	1.01863	1.0065	0.744414	0.7812
543	1.17517	1.14787	0.003357	0.009831	1.01752	1.01243	0.752587	0.784302
544	1.17583	1.14959	0.005217	0.007864	1.01535	1.0103	0.751362	0.779823
545	1.17213	1.14979	0.009761	0.012201	1.02122	1.00764	0.750005	0.781694
546	1.17492	1.14536	0.006998	0.010396	1.01238	1.0083	0.748739	0.776444
547	1.17346	1.15109	0.00806	0.006387	1.01794	1.01177	0.750766	0.776432
548	1.17353	1.15125	0.002252	0.010787	1.01854	1.00987	0.750114	0.778694
549	1.17015	1.14891	0.007812	0.006909	1.01824	1.01092	0.750356	0.777823
550	1.17179	1.15207	0.007143	0.009325	1.01974	1.00773	0.748177	0.782616
551	1.17711	1.15094	0.00377	0.012029	1.01338	1.0083	0.745974	0.785865
552	1.17162	1.1509	0.007033	0.009282	1.01796	1.00806	0.746367	0.782562
553	1.17623	1.14659	0.004766	0.009054	1.01491	1.00778	0.75219	0.779784
554	1.17293	1.14896	0.00568	0.003794	1.01555	1.0115	0.754956	0.779562
555	1.17427	1.14926	0.004411	0.008071	1.01877	1.00605	0.746066	0.778468
556	1.17154	1.15168	0.007102	0.005675	1.01648	1.00937	0.754207	0.779022
557	1.17178	1.15163	0.00663	0.008806	1.02073	1.00949	0.747875	0.778434
558	1.17609	1.14672	0.001158	0.007254	1.01765	1.01075	0.750509	0.777899
559	1.17194	1.15045	0.007371	0.008541	1.01847	1.00808	0.748272	0.776967
560	1.17405	1.14501	0.001483	0.005946	1.01422	1.0125	0.747249	0.777393
561	1.1726	1.15195	0.003897	0.006605	1.01944	1.00802	0.749196	0.778122
562	1.16978	1.14953	0.00233	0.006934	1.01433	1.00662	0.745838	0.780948
563	1.17434	1.14859	0.007712	0.01072	1.0165	1.01356	0.751464	0.77852
564	1.17137	1.14791	0.00494	0.007671	1.01407	1.00555	0.747684	0.778401
565	1.17257	1.15175	0.004082	0.008494	1.01545	1.00756	0.751635	0.777235
566	1.17229	1.14925	0.005771	0.007235	1.01601	1.00398	0.748522	0.782509
567	1.16929	1.15028	0.00637	0.007631	1.01345	1.00791	0.750669	0.781328
568	1.17733	1.15158	0.00497	0.011681	1.01242	1.01211	0.74726	0.782147
569	1.17357	1.14891	0.007205	0.005986	1.01626	1.01389	0.752011	0.777938
570	1.17464	1.15	0.003991	0.007978	1.01399	1.00978	0.748155	0.781769
571	1.17077	1.15233	0.002238	0.00786	1.01557	1.00978	0.753578	0.780689
572	1.17557	1.14771	0.008102	0.007059	1.01793	1.00809	0.750047	0.778259
573	1.17625	1.15061	0.007474	0.006616	1.01907	1.00964	0.747964	0.775227
574	1.17201	1.14529	0.004354	0.009251	1.01919	1.00972	0.748625	0.776304
575	1.17161	1.15265	0.002291	0.008433	1.01667	1.00669	0.748299	0.778247
576	1.16966	1.14949	0.006085	0.007373	1.02063	1.00257	0.745715	0.777082
577	1.17746	1.14843	0.004411	0.01016	1.01878	1.0086	0.748032	0.776521
578	1.1784	1.14726	0.001717	0.008698	1.01812	1.00752	0.750754	0.779917
579	1.17716	1.14487	0.007198	0.009703	1.01613	1.00627	0.751563	0.77844
580	1.17075	1.14592	0.000482	0.007516	1.01675	1.00734	0.747998	0.774426
581	1.17255	1.14774	0.00263	0.00779	1.01552	1.01107	0.750224	0.7771
582	1.17894	1.15231	-0.00177	0.007831	1.02104	1.00877	0.75106	0.780135
583	1.173	1.14898	0.001574	0.006753	1.01503	1.00643	0.747339	0.778326
584	1.17481	1.15094	0.007796	0.007458	1.01414	1.00694	0.751716	0.779393
585	1.17342	1.15171	0.005031	0.00855	1.01265	1.00834	0.746075	0.77584
586	1.17731	1.15309	0.005168	0.009362	1.01781	1.00728	0.750622	0.778813
587	1.17308	1.14729	0.008544	0.005801	1.01457	1.00607	0.749949	0.775197
588	1.17785	1.14676	0.004965	0.007156	1.01506	1.00538	0.751278	0.776938
589	1.17473	1.14998	0.005003	0.005271	1.01706	1.01164	0.748558	0.775181
590	1.1691	1.14889	0.005231	0.007269	1.0167	1.00391	0.754024	0.780521
591	1.17722	1.14462	0.004646	0.008927	1.01591	1.00997	0.749107	0.778082
592	1.17482	1.14656	0.003081	0.006862	1.01402	1.00617	0.74687	0.778773
593	1.17355	1.15308	0.005097	0.005697	1.01605	1.00269	0.747437	0.779748
594	1.17086	1.14881	0.007361	0.011526	1.01556	1.007	0.747838	0.7794
595	1.17279	1.1469	0.00597	0.003559	1.01126	1.00972	0.752412	0.776197
596	1.17403	1.14934	0.005205	0.000617	1.01405	1.0041	0.746784	0.778748
597	1.17029	1.14987	0.008167	0.007551	1.01775	1.00828	0.746394	0.77692
598	1.17537	1.15373	0.006772	0.009348	1.0159	1.00783	0.749624	0.77775
599	1.17578	1.15044	0.00442	0.010012	1.01127	1.01122	0.744798	0.781561
600	1.17639	1.15274	0.004415	0.009804	1.01879	1.00653	0.748821	0.774192

## Sheet: Fig 2e Source Data
BLI Response (nm) after 3A3 IgG-coupled biosensors are exposed to HexaPro or HexaPro E1031R
	HexaPro			HexaPro E1031R
Time (s)	50 nM	25 nM	12.5 nM	50 nM	25 nM	12.5 nM
Move biosensors to:	HexaPro			HexaPro E1031R
0	5.20417e-17	-1e-06	-4e-06	-5e-06	-3e-06	2e-06
4	0.004277	-0.00249	0.001287	0.043806	0.024993	0.008767
8	0.060763	0.037744	0.025987	0.504026	0.274496	0.14286
12	0.135427	0.074536	0.046431	0.756854	0.479796	0.263028
16	0.186506	0.104648	0.060077	0.891591	0.635015	0.38168
20	0.2518	0.146015	0.085359	0.957947	0.732455	0.467208
24	0.298192	0.168105	0.101729	1.0044	0.808072	0.545254
28	0.325105	0.19148	0.112796	1.04751	0.861804	0.62135
32	0.36728	0.221929	0.130389	1.07802	0.902106	0.676353
36	0.403466	0.253049	0.148259	1.09794	0.936216	0.718013
40	0.431518	0.270067	0.16182	1.11529	0.964013	0.759658
44	0.450973	0.286168	0.168017	1.13842	0.986134	0.792418
48	0.47907	0.311468	0.19102	1.14668	0.998923	0.812773
52	0.495912	0.331425	0.207694	1.15251	1.01098	0.838812
56	0.518057	0.350475	0.215164	1.17397	1.03092	0.861522
60	0.538052	0.371497	0.231867	1.18518	1.04514	0.877766
64	0.553826	0.387109	0.238425	1.18922	1.05559	0.895917
68	0.567174	0.401459	0.257778	1.20054	1.07175	0.91685
72	0.581255	0.409846	0.265713	1.21001	1.07444	0.921921
76	0.595115	0.429149	0.278971	1.21421	1.08551	0.935832
80	0.610345	0.447306	0.291731	1.22015	1.0942	0.946488
84	0.623957	0.455582	0.303975	1.22679	1.10031	0.954988
88	0.632874	0.467164	0.310642	1.23658	1.10844	0.966946
92	0.641081	0.476218	0.318282	1.23517	1.11364	0.976353
96	0.657866	0.490722	0.32835	1.25034	1.12356	0.985461
100	0.659027	0.495573	0.33602	1.24932	1.12962	0.98878
104	0.679854	0.515728	0.349118	1.25873	1.13577	1.0011
108	0.687176	0.51718	0.357266	1.26095	1.14005	1.00059
112	0.688981	0.526163	0.367033	1.26473	1.14508	1.0102
116	0.697385	0.535307	0.375228	1.27095	1.14768	1.01939
120	0.704094	0.545413	0.384798	1.27528	1.14791	1.02415
124	0.717644	0.558359	0.395329	1.27776	1.16369	1.03421
128	0.726972	0.564605	0.400262	1.28498	1.16206	1.03574
132	0.730731	0.569618	0.410488	1.28613	1.16729	1.037
136	0.740611	0.581069	0.42313	1.28702	1.17298	1.04376
140	0.742242	0.59091	0.421433	1.28486	1.16952	1.04466
144	0.750446	0.594386	0.430448	1.29289	1.17424	1.05103
148	0.760116	0.600344	0.434912	1.29785	1.17811	1.05794
152	0.762735	0.606876	0.443877	1.29929	1.18281	1.05907
156	0.775351	0.618668	0.453058	1.30103	1.18503	1.06863
160	0.77207	0.619839	0.452438	1.30467	1.18506	1.06728
164	0.78156	0.623732	0.458442	1.30746	1.19257	1.07212
168	0.791455	0.637941	0.470129	1.30894	1.1927	1.07148
172	0.792134	0.639431	0.479519	1.30986	1.19708	1.07482
176	0.802037	0.648714	0.484095	1.3159	1.20124	1.08167
180	0.803521	0.65187	0.49213	1.32161	1.20594	1.08742
184	0.808548	0.655348	0.489455	1.3188	1.20787	1.09355
188	0.815884	0.66268	0.499829	1.31663	1.20247	1.08758
192	0.824373	0.668824	0.504713	1.32256	1.20931	1.09373
196	0.822658	0.671387	0.508061	1.32173	1.2104	1.09469
200	0.828903	0.678536	0.516719	1.32848	1.21141	1.09614
204	0.833002	0.680331	0.520285	1.32813	1.21341	1.104
208	0.836977	0.686762	0.525031	1.32934	1.21582	1.10633
212	0.845677	0.69442	0.525871	1.33258	1.22655	1.11004
216	0.845899	0.695945	0.527533	1.33237	1.21897	1.10743
220	0.851802	0.704921	0.539105	1.33025	1.21798	1.10371
224	0.858086	0.70601	0.54448	1.33539	1.22119	1.11193
228	0.857116	0.706713	0.545754	1.33458	1.22463	1.11517
232	0.864705	0.713462	0.550853	1.33933	1.22687	1.12106
236	0.875145	0.72006	0.558859	1.34302	1.23386	1.12735
240	0.877348	0.732397	0.566665	1.34829	1.23594	1.12346
244	0.872954	0.72151	0.565766	1.34507	1.23503	1.12462
248	0.881456	0.73544	0.57623	1.34559	1.23436	1.12553
252	0.877883	0.734927	0.577832	1.34317	1.23887	1.12645
256	0.889173	0.732378	0.574895	1.34641	1.24018	1.13174
260	0.895304	0.745572	0.590168	1.34823	1.23864	1.12667
264	0.892948	0.746635	0.586641	1.35107	1.24062	1.13378
268	0.899512	0.752211	0.588301	1.35337	1.24233	1.13281
272	0.900282	0.750106	0.59486	1.35377	1.2422	1.13707
276	0.898287	0.754465	0.596632	1.35716	1.24605	1.13549
280	0.911774	0.764008	0.610417	1.35463	1.24599	1.14413
284	0.908006	0.770869	0.608639	1.35422	1.24628	1.1412
288	0.915367	0.768297	0.612741	1.35854	1.25	1.13996
292	0.914746	0.768054	0.615772	1.36143	1.24956	1.14159
296	0.929923	0.783481	0.622598	1.36086	1.251	1.14789
300	0.922142	0.780687	0.629077	1.35993	1.2525	1.13896
Move biosensors to:	Buffer			Buffer
304	0.925245	0.780924	0.621313	1.34592	1.24863	1.14819
308	0.934756	0.779793	0.632418	1.34173	1.24472	1.13666
312	0.936994	0.78431	0.631477	1.34582	1.24755	1.14041
316	0.938275	0.786322	0.630851	1.3418	1.24572	1.13801
320	0.938549	0.786327	0.63421	1.33726	1.23826	1.1323
324	0.941041	0.788024	0.636632	1.33874	1.24319	1.13352
328	0.937981	0.789362	0.629162	1.33844	1.2402	1.13356
332	0.941832	0.787849	0.628019	1.33912	1.24265	1.13942
336	0.94102	0.787086	0.631365	1.33849	1.24059	1.14001
340	0.946627	0.789822	0.635026	1.33165	1.23538	1.13367
344	0.945261	0.785858	0.643252	1.33089	1.2365	1.13148
348	0.946744	0.790844	0.635267	1.33304	1.24168	1.13734
352	0.943751	0.790982	0.640688	1.32983	1.23572	1.13697
356	0.94238	0.799108	0.634067	1.32929	1.23378	1.13242
360	0.947513	0.793145	0.642221	1.33177	1.23566	1.13373
364	0.948457	0.795134	0.631714	1.32801	1.2357	1.13159
368	0.944864	0.790838	0.635472	1.32709	1.23376	1.13361
372	0.941141	0.795118	0.635225	1.3292	1.23165	1.13167
376	0.946042	0.794226	0.642203	1.32648	1.23423	1.12733
380	0.953565	0.80072	0.640741	1.3269	1.23183	1.13202
384	0.948703	0.793881	0.64119	1.32252	1.23036	1.1248
388	0.941897	0.790442	0.641462	1.32662	1.23169	1.13233
392	0.947762	0.792794	0.643701	1.32388	1.23058	1.12931
396	0.94451	0.78414	0.641641	1.32725	1.23912	1.13333
400	0.952744	0.797131	0.642438	1.32834	1.23544	1.13405
404	0.945309	0.797025	0.63767	1.32478	1.22964	1.12962
408	0.943982	0.795026	0.647749	1.31933	1.22868	1.12085
412	0.946428	0.797097	0.642856	1.32196	1.23144	1.12655
416	0.945916	0.793233	0.636743	1.32103	1.22725	1.12454
420	0.945198	0.796773	0.645324	1.31614	1.22612	1.12779
424	0.945391	0.794409	0.638332	1.31973	1.22942	1.12598
428	0.948772	0.793617	0.640324	1.31508	1.22843	1.12322
432	0.940276	0.787345	0.636878	1.3204	1.22502	1.12493
436	0.940975	0.791245	0.644031	1.3245	1.23106	1.13225
440	0.948719	0.795402	0.641189	1.32322	1.23021	1.12798
444	0.947028	0.793496	0.642365	1.31423	1.22574	1.1241
448	0.951954	0.797656	0.647593	1.3164	1.22778	1.12572
452	0.951906	0.795528	0.64407	1.317	1.22644	1.12615
456	0.943077	0.786025	0.637724	1.32075	1.22957	1.12585
460	0.94836	0.795532	0.643338	1.31529	1.22415	1.12859
464	0.946187	0.795949	0.63978	1.31828	1.22689	1.12808
468	0.947558	0.795334	0.642322	1.31272	1.21997	1.11722
472	0.949678	0.795684	0.64438	1.31159	1.22152	1.12557
476	0.948731	0.798327	0.645881	1.31248	1.221	1.12544
480	0.944687	0.797747	0.642723	1.31178	1.22093	1.12758
484	0.953553	0.789543	0.642824	1.31412	1.22525	1.12431
488	0.952829	0.795768	0.645854	1.31398	1.22509	1.12378
492	0.943346	0.787895	0.63772	1.3064	1.21909	1.12051
496	0.947415	0.796224	0.644175	1.31058	1.22489	1.12326
500	0.9455	0.800296	0.645729	1.30384	1.22584	1.12098
504	0.945077	0.79601	0.643964	1.30678	1.2139	1.11716
508	0.940864	0.794073	0.646772	1.31259	1.21934	1.12338
512	0.935943	0.792243	0.644216	1.31143	1.22043	1.11902
516	0.947328	0.791816	0.641756	1.30689	1.21592	1.11759
520	0.950746	0.793358	0.64088	1.30697	1.21576	1.11677
524	0.944892	0.791706	0.644665	1.3088	1.21679	1.11745
528	0.945948	0.789737	0.644879	1.30531	1.21431	1.1186
532	0.945166	0.795482	0.640289	1.30325	1.21882	1.11967
536	0.944268	0.796128	0.647581	1.30866	1.22472	1.11884
540	0.939473	0.787944	0.6393	1.3038	1.21568	1.11769
544	0.945226	0.789412	0.645592	1.30905	1.21828	1.11892
548	0.95115	0.796186	0.645096	1.30449	1.21843	1.11877
552	0.937949	0.793743	0.643808	1.3029	1.219	1.1201
556	0.942646	0.795086	0.644522	1.30438	1.22104	1.12214
560	0.948336	0.796722	0.645319	1.30327	1.21135	1.11564
564	0.940643	0.79152	0.636557	1.29756	1.21391	1.11304
568	0.941511	0.790786	0.6398	1.3022	1.20917	1.11615
572	0.94334	0.794408	0.644724	1.29931	1.21153	1.11804
576	0.942654	0.791296	0.644651	1.30491	1.22067	1.12166
580	0.945771	0.799244	0.646991	1.30498	1.21404	1.11505
584	0.94254	0.792677	0.639343	1.30478	1.21527	1.11582
588	0.941181	0.794172	0.637131	1.30414	1.21857	1.11822
592	0.942837	0.79263	0.643961	1.29885	1.20905	1.11318
596	0.935516	0.787119	0.639319	1.29367	1.20702	1.11419
600	0.946477	0.791397	0.649369	1.3034	1.21521	1.11632
