# Supplementary material for: Identification of a conserved S2 epitope present on spike proteins from all highly pathogenic coronaviruses
Source: eLife. 2023 Mar 21;12:e83710. doi: 10.7554/eLife.83710 (PMC10030117; doi:10.7554/eLife.83710)
Supplement: Figure 3—source data 1. [file elife-83710-fig3-data1.xlsx]

## Sheet: Fig 3a Source Data
Log transformed ratio of binding to 3A3 relative to HexaPro
replicate	HexaPro	L981F	S982A	R983V	L984A	D985L	P986K, P987V (4P)	E988Q	E988I	E990Q	V991A	Q992L	D994A	R995A	T998A	L1001A	Q1002A	Q1005A	T1006A
1	0.003708	0.24366	0.777214	0.312269	0.866747	-3.16735	-2.53979	-3.11801	-1.77912	0.000547	-0.14776	0.447434	-0.54169	0.842011	-0.35304	-1.34406	-0.33565	-0.01073	-0.28073
2	-0.00374	0.196025	0.771866	0.596373	0.300006	-2.66266	-2.53903	-2.99226	-1.7105	-0.00055	-0.20877	0.495153	-0.52979	0.782302	-0.28249	-1.34512	-0.39262	0.024016	-0.37078
3	0.000331		0.788835	0.891238	0.924635	-2.09607	-2.0729	-2.71062	-1.30777	-0.18349	-0.12957	0.523951	-0.74048	0.432791	-0.34657	-0.51821	-0.43901	0.359469	0.016412
4	-0.00033		0.783779	0.829308	0.919989	-2.11993	-2.07373	-2.71606	-1.32541	-0.2	-0.15938	0.502437	-0.86904	0.453936	-0.40154	-0.52085	-0.42814	0.327214	0.035235
5	0.018794		0.426946	0.355972	0.386056	-2.1987		-3.17734	-2.18336	0.044501	-0.04743	0.488904	-0.42136	0.388478	-0.35134	-0.82689	-0.24952	-0.12835	-0.26131
6	-0.01964		0.427413	0.352774	0.365376	-2.5044		-3.06176	-2.10484	-0.0962	-0.01907	0.606454	-0.41127	0.369795	-0.37359	-0.84665	-0.23977	-0.1948	-0.29949
7	-0.01192		-0.10338	-0.04354	0.361416	-1.82531		-2.97754	-2.67778	-0.0806	-0.10672	0.771958	-0.42602	0.433029	-0.36634		-0.28343	-0.01013	-0.01734
8	0.011602		-0.09267	-0.02516	0.386612	-2.02684		-3.0555	-1.7415	-0.08275	-0.04499	0.826684	-0.37453	0.529081	-0.36617		-0.22577	0.040516	-0.01454
9	0.047859		-0.03933	0.195872		-3.60367			-3.08037
10	-0.05379		-0.03097	0.162991		-2.94362			-3.16422
11	0.02074
12	-0.03199
13	0.008749
14	-0.02207
15	0.012662
16	-0.01304
17	0.004907
18	-0.00496
19	0.009239
20	-0.00944
21	0.014607
22	-0.01512
23	-0.00277
24	0.002748
25	0.005317
26	-0.00538
27	-0.00104
28	0.001036

## Sheet: Fig 3d Source Data
Luminescence (RLU) of 293 ACE2 cells infected with lentivirus pseudotyped with spike mutants
	Unmodified Spike D614G			Spike D614G + D985L			Spike D614G + E988A			Spike D614G + E988Q
Viral Dilution (Pfu/ml)	replicate 1	replicate 2	replicate 3	replicate 1	replicate 2	replicate 3	replicate 1	replicate 2	replicate 3	replicate 1	replicate 2	replicate 3
150000000	1012246	1109340	1065188	18321	18663	17076	132560	111616	123905	465526	519812	441490
75000000	467888	521960	452540	3402	3364	3625	60522	64837	58007	236890	227888	196123
37500000	189522	205411	210372	1882	1830	1814	35685	37183	32254	90561	91763	86141
18750000	80424	85403	91070	1013	955	1003	16240	13168	12409	40255	35359	37702
9375000	39697	42088	35459	350	348	310	7912	8552	8342	23842	22277	21601
4687500	29652	26330	27152	240	229	255	5531	5700	5071	12911	12889	12714
2343750	12651	13891	13071	182	296	138	1374	1218	1148	6545	7032	6379
0	165	155	200	153	157	143	159	154	154	183	174	184
