# Supplementary material for: Identification of a conserved S2 epitope present on spike proteins from all highly pathogenic coronaviruses
Source: eLife. 2023 Mar 21;12:e83710. doi: 10.7554/eLife.83710 (PMC10030117; doi:10.7554/eLife.83710)
Supplement: Figure 4—source data 1. [file elife-83710-fig4-data1.xlsx]

## Sheet: Fig 4c Source Data
Inverse ELISA EC50 values for binding to plates coated with spike (top row) by 3A3 or RAY53
	SARS-2		SARS-2 HP		SARS-2 4P		SARS-2 4P-DS		SARS-2 HP Delta		SARS-2 HP Omicron BA.1		MERS		SARS-1		HKU1		no coat
	3A3	RAY53	3A3	RAY53	3A3	RAY53	3A3	RAY53	3A3	RAY53	3A3	RAY53	3A3	RAY53	3A3	RAY53	3A3	RAY53	3A3	RAY53
replicate 1	66.3811	59.5718	101.862	92.6084	0.001	0.0101808	0.00841524	0.917277	35.8515	18.5312	23.731	13.1541	54.6731	48.7395	52.8276	52.0431	1.05524	5.20017	0.001	0.001
replicate 2	68.2668	67.4669	94.1285	106.983	0.001	0.00470286	0.0089359	0.891668	35.1316	22.0941	29.5306	12.9045	45.294	80.16	94.1527	68.8677	0.98258	6.26857	0.001	0.001
average	67.3107	63.274	97.8428	99.2779	0.001	0.00643375	0.00866776	0.904291	35.4879	20.1564	26.3151	13.0281	49.5435	60.6202	67.6806	59.2848	1.01762	5.6846	0.001	0.001

## Sheet: Fig 4e Source Data
Background subtracted flow cytometry GMFI for antibody binding to Expi293 ACE2 cells
Antibody Concentration (nM)	RAY53			3A3
	replicate 1	replicate 2	replicate 3	replicate 1	replicate 2	replicate 3
300	4855	4635	4674	-63.3333	-88.3333	-79.3333
100	3579.67	3258.67	3770.67	24	11	12
33.3333	795.667	1067.67	1557.67	57.3333	225.333	217.333
11.1111	803.667	124.667	85.6667	101.667	81.6667	99.6667
3.7037	-23.6667	-32.6667	150.333	61.6667	107.667	-12.3333
1.23457	164.667	71.6667	69.6667	10.3333	205.333	-11.6667
