# Supplementary material for: Identification of a conserved S2 epitope present on spike proteins from all highly pathogenic coronaviruses
Source: eLife. 2023 Mar 21;12:e83710. doi: 10.7554/eLife.83710 (PMC10030117; doi:10.7554/eLife.83710)
Supplement: Figure 5—source data 1. [file elife-83710-fig5-data1.xlsx]

## Sheet: Fig 5a Source Data
Pseudotyped virus entry percent of HEK 293-T ACE-2 or DPP4 cells after infection with pseudotyped lentivirus (spike variant in top row) and incubation with antibody (second row)
Log of Antibody Concentration (nM)	SARS-2								SARS-1										SARS-2 Omicron BA.1												MERS								VSV-G
	3A3		RAY53		S309		Isotype Control		3A3			RAY53		S309			Isotype Control		3A3			RAY53			S309			Isotype Control			3A3		RAY53		S309		Isotype Control		3A3			RAY53		S309			Isotype Control
	replicate 1	replicate 2	replicate 1	replicate 2	replicate 1	replicate 2	replicate 1	replicate 2	replicate 1	replicate 2	replicate 3	replicate 1	replicate 2	replicate 1	replicate 2	replicate 3	replicate 1	replicate 2	replicate 1	replicate 2	replicate 3	replicate 1	replicate 2	replicate 3	replicate 1	replicate 2	replicate 3	replicate 1	replicate 2	replicate 3	replicate 1	replicate 2	replicate 1	replicate 2	replicate 1	replicate 2	replicate 1	replicate 2	replicate 1	replicate 2	replicate 3	replicate 1	replicate 2	replicate 1	replicate 2	replicate 3	replicate 1	replicate 2	replicate 3
2.82391																			75.2202	81.2949	77.0251	87.5564	88.2707	81.8954				87.5763	96.0664	87.5763	60.1398	58.6204	52.2518	51.9537			94.3833	93.0944						95.136	92.0985	96.536
2.52288	46.052	52.6827	41.2086	38.3432			108.588	92.9784	0.3263	0.214415	0.236	97.18	90.43				92.038	91.3102	88.2646	82.3079	87.8748	93.8726	89.0328	82.3424				90.8052	92.6595	90.8052	58.4167	57.5167	54.8472	56.6852			94.7009	91.2611	55.7246	60.2564	65.2527	97.17	98.66	99.056	100.547	95.001	94.3812	99.608	93.5781
2.22185	54.566	63.4036	45.3701	47.4469			97.7889	97.0264	69.185	52.2713	75.111	101.44	95.85				98.365	97.4987	84.5852	96.4587	89.0037	100.781	89.3869	92.7267	1.05091	0.818182	0.889091	95.9683	96.0137	95.9683	62.6926	58.1546	54.7324	55.3009	88.4824	90.3509	95.7009	91.9583	99.1337	98.2556	95.2526	96.71	98.73	99.235	90.906	98.102	100.578	99.8535	99.4126
1.92082	68.102	75.9	47.7983	56.574			90.0811	93.8795	90.315	77.8488	92.054	103.46	103.98				100.045	107.01	85.9436	95.1638	89.9717	102.016	91.6352	92.6031	1.64909	1.91818	1.56182	92.6159	98.2893	92.6159	63.0778	66.1102	59.3944	56.6018	89.8296	88.2704	97.6157	102.394	100.134	99.2568	100.256	93.96	100.62	97.026	106.076	95.038	102.426	103.429	104.349
1.61979	81.0888	72.977	65.2249	77.5219			106.633	104.998	90.022	81.3102	95.019	102.6	99.24				101.325	101.794	95.0512	91.2266	99.9237	90.7816	99.9237	92.4942	8.28545	7.07636	7.63818	94.4555	92.4179	94.4555	69.088	78.7046	61.8083	64.6018	88.2944	91.0324	93.1157	100.509	101.61	100.357	100.256	95.6	104.49	98.354	103.013	100.235	104.549	103.175	101.567
1.31876	90.9269	92.8985	74.4691	86.4304	8.87	8.49	97.8721	109.101	92.256	89.5479	88.721	101.35	102.92	5.129	6.23139	4.2	102.365	104.849	98.4291	94.3992	91.617	93.6536	94.9804	98.1469	9.26727	12.7727	14.1964	95.3036	93.3859	95.3037	78.1417	85.4676	72.2889	75.2083	89.8972	92.9509	94.6213	91.3	100.069	99.5256	100.246	106.49	103.47	99.638	94.515	103.552	101.257	103.474	102.458
1.01773	89.3772	103.982	87.9763	93.9959	13.88	10.92	93.6577	109.184	100.365	108.416	90.621	97.91	98.61	12.354	11.4166	8.656	99.236	104.477	97.9467	101.72	95.5888	99.6586	93.5239	92.2552	23.0436	33.68	28.8764	94.2503	91.3482	94.2503	90.3148	97.9935	75.7333	83.7574	91.9694	91.5694	95.6944	95.0602	99.8933	99.2546	101.256	109.27	109.13	103.604	102.553	99.3775	100.357	108.224	105.259
0.716699	98.7837	103.708	95.862	103.053	12.56	15.07	97.5809	89.6098	102.109	96.7138	100.356			16.344	19.3795	12.005	98.235	102.845	98.7485	100.278	96.5102	99.0522	92.1149	95.265	47.5509	51.74	40.9836	95.256	93.4052	93.1503					98.4185	96.2037
0.425969					20.74	15.11								18.441	24.3198	18.311									74.0182	81.4545	71.8218								96.3231	93.8472
0.124939					14.78	32.69								30.551	35.9052	28.561									80.5875	88.6027	85.0045
-0.17609					42.34	44.17						99.02	102.48	40.302	39.1419	38.252																								100.256	100.256	104.62	104.22
-0.47712					61.78	61.45								55.101	64.3364	52.212
no antibody	101.275	98.7249	97.7982	102.202	99.7	100.3	98.2325	101.767	103.65	95.539	100.811	96.92	106.12	98.314	103.125	100.393	101.25	98.75	99.0293	100.249	97.4521	100	92.3689	95.0912	97.1891	91.3764	100.6	94.4374	92.6595	94.4374	97.8509	92.7352	97.987	90.9444	98.4518	97.4296	100.137	91.6778	100	100	100	109.12	97.7	101.895	97.231	100.808	100	100	100

## Sheet: Fig 5b Source Data
Authentic virus infection percent after incubation of HEK 293T ACE-2 cells with authentic SARS-2 virus and the indicated antibody
Log of Antibody Concentration (nM)	3A3				RAY53				S309				Isotype Control
	replicate 1	replicate 2	replicate 3	replicate 4	replicate 1	replicate 2	replicate 3	replicate 4	replicate 1	replicate 2	replicate 3	replicate 4	replicate 1	replicate 2	replicate 3	replicate 4
2.82391	85.2161	99.4693	78.5444	91.2813	130.317	124.887	131.041	143.71	1.12994	0	1.88324	1.12994	92.4606	105.054	139.519	126.926
2.52288	90.0682	88.2487	79.4541	91.5845	112.217	112.579	118.371	123.439	0.753296	1.12994	2.25989	1.88324	115.659	87.821	118.641	106.379
2.22185	92.7976	93.1008	74.2987	83.0933	95.9276	95.9276	90.1357	116.199	1.88324	0.376648	2.25989	1.88324	94.7804	100.083	114.333	103.065
1.92082	101.895	98.2563	79.7574	80.9704	98.0995	115.475	106.063	100.271	1.50659	3.38983	1.88324	3.76648	136.868	91.7978	94.449	84.507
1.61979	102.502	83.0933	81.577	72.7824	105.701	103.167	95.9276	99.9095	3.01318	3.76648	3.38983	4.14313	117.978	77.5476	96.7688	92.4606
1.31876	109.78	87.9454	69.7498	78.8476	104.977	101.719	85.4299	90.8597	3.38983	6.77966	6.02637	5.64972	96.7688	97.4316	109.031	90.8036
1.01773	104.625	79.1509	76.7248	70.6596	96.6516	95.5656	92.6697	94.4796	2.25989	10.9228	10.9228	7.15631	117.978	102.734	88.4838	89.1466
0.716699	103.412	90.6748	85.2161	68.84	76.3801	81.448	93.3937	114.751	15.0659	18.4557	14.6893	15.0659	112.345	80.5302	109.362	102.071
0.425969	78.5444	87.3389	98.2563	93.7074	96.2896	102.443	105.339	112.217	22.9755	33.5217	35.4049	29.3785	129.577	95.1118	88.4838	80.5302
0.124939	105.838	87.0356	85.5193	116.452	96.2896	103.529	105.701	100.271	43.3145	51.2241	59.887	46.7043	106.048	98.7572	83.8442	95.7746
no antibody	112.509	97.953	99.7726	89.765	94.4796	105.701	100.633	99.1855	102.072	90.3955	109.981	97.5518	104.391	100.414	84.8384	110.356

## Sheet: Fig 5c Source Data
Phagocytosis score of HexaPro or 4PDS spike coated beads incubated with antibody and THP-1 monocytes
	HexaPro				4PDS
replicate	Isotype	S309	3A3	RAY53	Isotype	S309	3A3	RAY53
1	964	26846	27917	31298	126	12095	1754.61	15694.4
2	929	39531	41383	35294	124.8	10025.6	1463.16	13480.8
3	597	23598	33659	29364	314.73	7083.2	985.8	9922
4	1032	30364	29753	26896	156.42	7405.7	1633.45	8210

## Sheet: Fig 5d Source Data
Percent of spike expressing Expi 293 cells lysed after incubation with the indicated antibody and NK-92 cells
	Isotype Control		CR3022		RAY53
	replicate 1	replicate 2	replicate 1	replicate 2	replicate 1	replicate 2
mock	1.40028	2.29294	-0.26175	4.17007	0.680707	1.52612
spike	-1.03174	-0.39026	9.78027	9.57708	10.3096	9.46238
