# Supplementary material for: Identification of a conserved S2 epitope present on spike proteins from all highly pathogenic coronaviruses
Source: eLife. 2023 Mar 21;12:e83710. doi: 10.7554/eLife.83710 (PMC10030117; doi:10.7554/eLife.83710)
Supplement: Supplementary file 2. [file elife-83710-supp2.xlsx]

## Sheet: Spike with 3A3 IgG or Fab
Protein	Start	End	Sequence	Modification	Fragment	MaxUptake	MHP	State	Exposure	Center	Center SD	Uptake	Uptake SD	RT	RT SD
S2 spike	32	42	FTRGVYYPDKV			9	1344.69	S2_3A3Fab_complex	0	1345.5	0.035352	0	0	6.55653	0.042565
S2 spike	32	42	FTRGVYYPDKV			9	1344.69	S2_3A3Fab_complex	0.167	1346.29	0.023801	0.792387	0.042617	6.61349	0.000901
S2 spike	32	42	FTRGVYYPDKV			9	1344.69	S2_3A3Fab_complex	1.667	1346.62	0.04299	1.11811	0.055659	6.61278	0.007688
S2 spike	32	42	FTRGVYYPDKV			9	1344.69	S2_3A3Fab_complex	16.667	1347.05	0.047756	1.54778	0.059417	6.5808	0.04643
S2 spike	32	42	FTRGVYYPDKV			9	1344.69	S2_3A3Fab_complex	166.667	1347.93	0.052693	2.42744	0.063453	6.61624	0.012834
S2 spike	32	42	FTRGVYYPDKV			9	1344.69	S2_Alone	0	1345.5	0.035352	0	0	6.55653	0.042565
S2 spike	32	42	FTRGVYYPDKV			9	1344.69	S2_Alone	0.167	1346.33	0.043556	0.831911	0.056097	6.57528	0.041428
S2 spike	32	42	FTRGVYYPDKV			9	1344.69	S2_Alone	1.667	1346.58	0.050954	1.08526	0.062017	6.58553	0.057463
S2 spike	32	42	FTRGVYYPDKV			9	1344.69	S2_Alone	16.667	1347.05	0.056409	1.55321	0.066571	6.61319	0.012776
S2 spike	32	42	FTRGVYYPDKV			9	1344.69	S2_Alone	166.667	1348.02	0.093766	2.5211	0.100209	6.55966	0.05319
S2 spike	32	42	FTRGVYYPDKV			9	1344.69	S2_FL_complex	0	1345.5	0.035352	0	0	6.55653	0.042565
S2 spike	32	42	FTRGVYYPDKV			9	1344.69	S2_FL_complex	0.167	1346.34	0.019049	0.837267	0.040158	6.593	0.044347
S2 spike	32	42	FTRGVYYPDKV			9	1344.69	S2_FL_complex	1.667	1346.54	0.064829	1.0461	0.073842	6.6117	0.015891
S2 spike	32	42	FTRGVYYPDKV			9	1344.69	S2_FL_complex	16.667	1347.03	0.016999	1.53103	0.039227	6.5885	0.049147
S2 spike	32	42	FTRGVYYPDKV			9	1344.69	S2_FL_complex	166.667	1347.97	0.119397	2.47215	0.124521	6.577	0.03223
S2 spike	32	43	FTRGVYYPDKVF			10	1491.76	S2_3A3Fab_complex	0	1492.74	0.044707	0	0	7.14732	0.034858
S2 spike	32	43	FTRGVYYPDKVF			10	1491.76	S2_3A3Fab_complex	0.167	1493.51	0.007589	0.774516	0.045346	7.1876	0.00234
S2 spike	32	43	FTRGVYYPDKVF			10	1491.76	S2_3A3Fab_complex	1.667	1494.03	0.024319	1.29312	0.050893	7.18317	0.009458
S2 spike	32	43	FTRGVYYPDKVF			10	1491.76	S2_3A3Fab_complex	16.667	1494.73	0.052834	1.9981	0.069211	7.16274	0.034281
S2 spike	32	43	FTRGVYYPDKVF			10	1491.76	S2_3A3Fab_complex	166.667	1495.65	0.116795	2.91215	0.125059	7.18989	0.014657
S2 spike	32	43	FTRGVYYPDKVF			10	1491.76	S2_Alone	0	1492.74	0.044707	0	0	7.14732	0.034858
S2 spike	32	43	FTRGVYYPDKVF			10	1491.76	S2_Alone	0.167	1493.61	0.028796	0.872314	0.053178	7.16049	0.029665
S2 spike	32	43	FTRGVYYPDKVF			10	1491.76	S2_Alone	1.667	1494.05	0.063742	1.31126	0.077857	7.16707	0.041335
S2 spike	32	43	FTRGVYYPDKVF			10	1491.76	S2_Alone	16.667	1494.82	0.044122	2.08449	0.062813	7.18788	0.010639
S2 spike	32	43	FTRGVYYPDKVF			10	1491.76	S2_Alone	166.667	1495.71	0.081532	2.97579	0.092985	7.15253	0.038982
S2 spike	32	43	FTRGVYYPDKVF			10	1491.76	S2_FL_complex	0	1492.74	0.044707	0	0	7.14732	0.034858
S2 spike	32	43	FTRGVYYPDKVF			10	1491.76	S2_FL_complex	0.167	1493.48	0.071871	0.740734	0.084641	7.16808	0.033064
S2 spike	32	43	FTRGVYYPDKVF			10	1491.76	S2_FL_complex	1.667	1493.97	0.02616	1.23987	0.051798	7.18278	0.015608
S2 spike	32	43	FTRGVYYPDKVF			10	1491.76	S2_FL_complex	16.667	1494.69	0.040117	1.95207	0.060067	7.16842	0.036539
S2 spike	32	43	FTRGVYYPDKVF			10	1491.76	S2_FL_complex	166.667	1495.64	0.090196	2.90533	0.100668	7.1505	0.023282
S2 spike	32	53	FTRGVYYPDKVFRSSVLHSTQD			20	2602.3	S2_3A3Fab_complex	0	2603.77	0.068487	0	0	6.79515	0.035895
S2 spike	32	53	FTRGVYYPDKVFRSSVLHSTQD			20	2602.3	S2_3A3Fab_complex	0.167	2605.97	0	2.19528	0.068487	6.87577	0
S2 spike	32	53	FTRGVYYPDKVFRSSVLHSTQD			20	2602.3	S2_3A3Fab_complex	1.667	2607.23	0.144213	3.46042	0.15965	6.86698	0.008539
S2 spike	32	53	FTRGVYYPDKVFRSSVLHSTQD			20	2602.3	S2_3A3Fab_complex	16.667	2608.74	0.255457	4.97043	0.264479	6.87174	0.00464
S2 spike	32	53	FTRGVYYPDKVFRSSVLHSTQD			20	2602.3	S2_3A3Fab_complex	166.667	2610.37	0.126196	6.59747	0.143583	6.85364	0.003419
S2 spike	32	53	FTRGVYYPDKVFRSSVLHSTQD			20	2602.3	S2_Alone	0	2603.77	0.068487	0	0	6.79515	0.035895
S2 spike	32	53	FTRGVYYPDKVFRSSVLHSTQD			20	2602.3	S2_Alone	0.167	2606.17	0.193179	2.39922	0.20496	6.80556	0.033932
S2 spike	32	53	FTRGVYYPDKVFRSSVLHSTQD			20	2602.3	S2_Alone	1.667	2607.34	0.139952	3.57033	0.155811	6.80714	0.0506
S2 spike	32	53	FTRGVYYPDKVFRSSVLHSTQD			20	2602.3	S2_Alone	16.667	2608.68	0.200217	4.90886	0.211607	6.84337	0.013719
S2 spike	32	53	FTRGVYYPDKVFRSSVLHSTQD			20	2602.3	S2_Alone	166.667	2610.5	0.046476	6.73068	0.082768	6.78706	0.039548
S2 spike	32	53	FTRGVYYPDKVFRSSVLHSTQD			20	2602.3	S2_FL_complex	0	2603.77	0.068487	0	0	6.79515	0.035895
S2 spike	32	53	FTRGVYYPDKVFRSSVLHSTQD			20	2602.3	S2_FL_complex	0.167	2606.08	0.258592	2.30575	0.267508	6.83915	0.043325
S2 spike	32	53	FTRGVYYPDKVFRSSVLHSTQD			20	2602.3	S2_FL_complex	1.667	2607.16	0.229679	3.39244	0.239673	6.86028	0.008997
S2 spike	32	53	FTRGVYYPDKVFRSSVLHSTQD			20	2602.3	S2_FL_complex	16.667	2608.78	0.14949	5.01237	0.164431	6.83163	0.042772
S2 spike	32	53	FTRGVYYPDKVFRSSVLHSTQD			20	2602.3	S2_FL_complex	166.667	2610.33	0.187142	6.55891	0.19928	6.82137	0.027526
S2 spike	44	53	RSSVLHSTQD			9	1129.56	S2_3A3Fab_complex	0	1130.15	0.05984	0	0	5.39259	0.062398
S2 spike	44	53	RSSVLHSTQD			9	1129.56	S2_3A3Fab_complex	0.167	1131.2	0.00202	1.05312	0.059874	5.47139	0.003083
S2 spike	44	53	RSSVLHSTQD			9	1129.56	S2_3A3Fab_complex	1.667	1131.7	0.05912	1.54404	0.084119	5.47567	0.008956
S2 spike	44	53	RSSVLHSTQD			9	1129.56	S2_3A3Fab_complex	16.667	1132.15	0.072924	1.99984	0.094333	5.42593	0.067114
S2 spike	44	53	RSSVLHSTQD			9	1129.56	S2_3A3Fab_complex	166.667	1132.56	0.03188	2.40638	0.067802	5.48118	0.015914
S2 spike	44	53	RSSVLHSTQD			9	1129.56	S2_Alone	0	1130.15	0.05984	0	0	5.39259	0.062398
S2 spike	44	53	RSSVLHSTQD			9	1129.56	S2_Alone	0.167	1131.19	0.033228	1.04256	0.068447	5.42354	0.056078
S2 spike	44	53	RSSVLHSTQD			9	1129.56	S2_Alone	1.667	1131.74	0.08008	1.58922	0.099968	5.43159	0.081118
S2 spike	44	53	RSSVLHSTQD			9	1129.56	S2_Alone	16.667	1132.12	0.045934	1.97031	0.075437	5.472	0.016532
S2 spike	44	53	RSSVLHSTQD			9	1129.56	S2_Alone	166.667	1132.63	0.095983	2.47611	0.113109	5.3876	0.068944
S2 spike	44	53	RSSVLHSTQD			9	1129.56	S2_FL_complex	0	1130.15	0.05984	0	0	5.39259	0.062398
S2 spike	44	53	RSSVLHSTQD			9	1129.56	S2_FL_complex	0.167	1131.18	0.027208	1.02886	0.065735	5.4516	0.066262
S2 spike	44	53	RSSVLHSTQD			9	1129.56	S2_FL_complex	1.667	1131.65	0.046528	1.49735	0.0758	5.48162	0.017849
S2 spike	44	53	RSSVLHSTQD			9	1129.56	S2_FL_complex	16.667	1132.13	0.038581	1.97844	0.071199	5.42878	0.071448
S2 spike	44	53	RSSVLHSTQD			9	1129.56	S2_FL_complex	166.667	1132.5	0.0751	2.34726	0.096025	5.43137	0.054151
S2 spike	49	55	HSTQDLF			6	847.394	S2_3A3Fab_complex	0	847.837	0.014007	0	0	7.18362	0.034064
S2 spike	49	55	HSTQDLF			6	847.394	S2_3A3Fab_complex	0.167	848.408	0.015589	0.571277	0.020957	7.22667	0.001937
S2 spike	49	55	HSTQDLF			6	847.394	S2_3A3Fab_complex	1.667	848.504	0.017641	0.667218	0.022525	7.22405	0.007834
S2 spike	49	55	HSTQDLF			6	847.394	S2_3A3Fab_complex	16.667	848.763	0.041695	0.926173	0.043985	7.19583	0.03457
S2 spike	49	55	HSTQDLF			6	847.394	S2_3A3Fab_complex	166.667	849.281	0.061472	1.44392	0.063048	7.22596	0.0124
S2 spike	49	55	HSTQDLF			6	847.394	S2_Alone	0	847.837	0.014007	0	0	7.18362	0.034064
S2 spike	49	55	HSTQDLF			6	847.394	S2_Alone	0.167	848.45	0.003787	0.613289	0.01451	7.1967	0.030769
S2 spike	49	55	HSTQDLF			6	847.394	S2_Alone	1.667	848.493	0.031645	0.655759	0.034607	7.20289	0.043148
S2 spike	49	55	HSTQDLF			6	847.394	S2_Alone	16.667	848.774	0.033217	0.936902	0.036049	7.22579	0.010547
S2 spike	49	55	HSTQDLF			6	847.394	S2_Alone	166.667	849.277	0.044757	1.4402	0.046897	7.18551	0.038967
S2 spike	49	55	HSTQDLF			6	847.394	S2_FL_complex	0	847.837	0.014007	0	0	7.18362	0.034064
S2 spike	49	55	HSTQDLF			6	847.394	S2_FL_complex	0.167	848.454	0.018015	0.616897	0.022819	7.20557	0.036939
S2 spike	49	55	HSTQDLF			6	847.394	S2_FL_complex	1.667	848.474	0.01898	0.636959	0.023589	7.2202	0.012654
S2 spike	49	55	HSTQDLF			6	847.394	S2_FL_complex	16.667	848.767	0.019613	0.930065	0.024101	7.19999	0.040325
S2 spike	49	55	HSTQDLF			6	847.394	S2_FL_complex	166.667	849.224	0.037801	1.38716	0.040312	7.19191	0.024195
S2 spike	49	56	HSTQDLFL			7	960.479	S2_3A3Fab_complex	0	960.967	0.012574	0	0	7.60269	0.022553
S2 spike	49	56	HSTQDLFL			7	960.479	S2_3A3Fab_complex	0.167	961.547	0.009506	0.579255	0.015763	7.62957	0.002545
S2 spike	49	56	HSTQDLFL			7	960.479	S2_3A3Fab_complex	1.667	961.625	0.027841	0.658012	0.030548	7.6263	0.009861
S2 spike	49	56	HSTQDLFL			7	960.479	S2_3A3Fab_complex	16.667	961.903	0.039996	0.935944	0.041926	7.61017	0.021525
S2 spike	49	56	HSTQDLFL			7	960.479	S2_3A3Fab_complex	166.667	962.347	0.034495	1.37964	0.036715	7.62715	0.012577
S2 spike	49	56	HSTQDLFL			7	960.479	S2_Alone	0	960.972	0.014573	0	0	7.60274	0.022567
S2 spike	49	56	HSTQDLFL			7	960.479	S2_Alone	0.167	961.574	0.028656	0.601897	0.032149	7.60739	0.020035
S2 spike	49	56	HSTQDLFL			7	960.479	S2_Alone	1.667	961.605	0.048762	0.632835	0.050894	7.61343	0.027021
S2 spike	49	56	HSTQDLFL			7	960.479	S2_Alone	16.667	961.897	0.03146	0.924937	0.034672	7.62788	0.008091
S2 spike	49	56	HSTQDLFL			7	960.479	S2_Alone	166.667	962.343	0.03889	1.37114	0.041531	7.60325	0.026431
S2 spike	49	56	HSTQDLFL			7	960.479	S2_FL_complex	0	960.972	0.014573	0	0	7.60274	0.022567
S2 spike	49	56	HSTQDLFL			7	960.479	S2_FL_complex	0.167	961.568	0.019733	0.595846	0.024531	7.6175	0.023082
S2 spike	49	56	HSTQDLFL			7	960.479	S2_FL_complex	1.667	961.604	0.033912	0.632404	0.036911	7.62442	0.009904
S2 spike	49	56	HSTQDLFL			7	960.479	S2_FL_complex	16.667	961.906	0.023255	0.934357	0.027444	7.61376	0.026092
S2 spike	49	56	HSTQDLFL			7	960.479	S2_FL_complex	166.667	962.352	0.034757	1.38063	0.037689	7.60338	0.012963
S2 spike	49	58	HSTQDLFLPF			8	1204.6	S2_3A3Fab_complex	0	1205.2	0.047887	0	0	8.25216	0.013731
S2 spike	49	58	HSTQDLFLPF			8	1204.6	S2_3A3Fab_complex	0.167	1205.71	0.076628	0.510391	0.090361	8.26594	0.003762
S2 spike	49	58	HSTQDLFLPF			8	1204.6	S2_3A3Fab_complex	1.667	1205.57	0.047902	0.368444	0.067733	8.26079	0.010602
S2 spike	49	58	HSTQDLFLPF			8	1204.6	S2_3A3Fab_complex	16.667	1206.02	0.112291	0.821481	0.122076	8.25722	0.007525
S2 spike	49	58	HSTQDLFLPF			8	1204.6	S2_3A3Fab_complex	166.667	1206.38	0.072704	1.18437	0.087057	8.26075	0.016264
S2 spike	49	58	HSTQDLFLPF			8	1204.6	S2_Alone	0	1205.2	0.047887	0	0	8.25216	0.013731
S2 spike	49	58	HSTQDLFLPF			8	1204.6	S2_Alone	0.167	1205.69	0.078127	0.4902	0.091635	8.2441	0.023082
S2 spike	49	58	HSTQDLFLPF			8	1204.6	S2_Alone	1.667	1205.57	0.049341	0.373283	0.068758	8.26217	0.009602
S2 spike	49	58	HSTQDLFLPF			8	1204.6	S2_Alone	16.667	1206	0.119118	0.79525	0.128383	8.25829	0.007223
S2 spike	49	58	HSTQDLFLPF			8	1204.6	S2_Alone	166.667	1206.42	0.124721	1.21813	0.133599	8.24797	0.015138
S2 spike	49	58	HSTQDLFLPF			8	1204.6	S2_FL_complex	0	1205.2	0.047887	0	0	8.25216	0.013731
S2 spike	49	58	HSTQDLFLPF			8	1204.6	S2_FL_complex	0.167	1205.69	0.086294	0.486139	0.09869	8.25681	0.016595
S2 spike	49	58	HSTQDLFLPF			8	1204.6	S2_FL_complex	1.667	1205.58	0.050061	0.37696	0.069277	8.26564	0.010677
S2 spike	49	58	HSTQDLFLPF			8	1204.6	S2_FL_complex	16.667	1205.94	0.088249	0.743294	0.100405	8.26161	0.0123
S2 spike	49	58	HSTQDLFLPF			8	1204.6	S2_FL_complex	166.667	1206.37	0.093933	1.17216	0.105436	8.24727	0.008008
S2 spike	85	91	PFNDGVY			5	811.362	S2_3A3Fab_complex	0	811.749	0.012643	0	0	7.36048	0.03189
S2 spike	85	91	PFNDGVY			5	811.362	S2_3A3Fab_complex	0.167	812.344	0.050017	0.59509	0.051591	7.40131	0.002289
S2 spike	85	91	PFNDGVY			5	811.362	S2_3A3Fab_complex	1.667	812.545	0.041184	0.796007	0.043081	7.39612	0.00889
S2 spike	85	91	PFNDGVY			5	811.362	S2_3A3Fab_complex	16.667	812.823	0.06446	1.07416	0.065689	7.37607	0.031215
S2 spike	85	91	PFNDGVY			5	811.362	S2_3A3Fab_complex	166.667	813.227	0.068634	1.47831	0.069789	7.40028	0.012086
S2 spike	85	91	PFNDGVY			5	811.362	S2_Alone	0	811.749	0.012643	0	0	7.36048	0.03189
S2 spike	85	91	PFNDGVY			5	811.362	S2_Alone	0.167	812.305	0.066377	0.55604	0.06757	7.37448	0.027921
S2 spike	85	91	PFNDGVY			5	811.362	S2_Alone	1.667	812.602	0.083991	0.853509	0.084937	7.38267	0.036562
S2 spike	85	91	PFNDGVY			5	811.362	S2_Alone	16.667	812.875	0.051998	1.12611	0.053513	7.39688	0.011196
S2 spike	85	91	PFNDGVY			5	811.362	S2_Alone	166.667	813.256	0.037861	1.50768	0.039916	7.36184	0.037074
S2 spike	85	91	PFNDGVY			5	811.362	S2_FL_complex	0	811.749	0.012643	0	0	7.36048	0.03189
S2 spike	85	91	PFNDGVY			5	811.362	S2_FL_complex	0.167	812.321	0.033303	0.572032	0.035622	7.38044	0.032937
S2 spike	85	91	PFNDGVY			5	811.362	S2_FL_complex	1.667	812.547	0.044573	0.798676	0.046331	7.39589	0.015362
S2 spike	85	91	PFNDGVY			5	811.362	S2_FL_complex	16.667	812.833	0.044708	1.08415	0.046461	7.37818	0.03612
S2 spike	85	91	PFNDGVY			5	811.362	S2_FL_complex	166.667	813.165	0.02698	1.4166	0.029796	7.36662	0.02082
S2 spike	92	106	FASTEKSNIIRGWIF			14	1768.94	S2_3A3Fab_complex	0	1770.22	0.080251	0	0	7.92414	0.019463
S2 spike	92	106	FASTEKSNIIRGWIF			14	1768.94	S2_3A3Fab_complex	0.167	1771.94	0.057712	1.71898	0.098848	7.94616	0.002404
S2 spike	92	106	FASTEKSNIIRGWIF			14	1768.94	S2_3A3Fab_complex	1.667	1772.7	0.148127	2.481	0.168469	7.94172	0.009307
S2 spike	92	106	FASTEKSNIIRGWIF			14	1768.94	S2_3A3Fab_complex	16.667	1773.04	0.12717	2.82221	0.150375	7.93085	0.012174
S2 spike	92	106	FASTEKSNIIRGWIF			14	1768.94	S2_3A3Fab_complex	166.667	1773.42	0.228099	3.19541	0.241805	7.93829	0.008713
S2 spike	92	106	FASTEKSNIIRGWIF			14	1768.94	S2_Alone	0	1770.22	0.080251	0	0	7.92414	0.019463
S2 spike	92	106	FASTEKSNIIRGWIF			14	1768.94	S2_Alone	0.167	1772.1	0.213515	1.87945	0.228098	7.92495	0.014933
S2 spike	92	106	FASTEKSNIIRGWIF			14	1768.94	S2_Alone	1.667	1772.69	0.182983	2.46342	0.199808	7.9305	0.016632
S2 spike	92	106	FASTEKSNIIRGWIF			14	1768.94	S2_Alone	16.667	1773.08	0.104609	2.86253	0.131846	7.94125	0.006063
S2 spike	92	106	FASTEKSNIIRGWIF			14	1768.94	S2_Alone	166.667	1773.51	0.151324	3.29049	0.171287	7.92764	0.018877
S2 spike	92	106	FASTEKSNIIRGWIF			14	1768.94	S2_FL_complex	0	1770.22	0.080251	0	0	7.92414	0.019463
S2 spike	92	106	FASTEKSNIIRGWIF			14	1768.94	S2_FL_complex	0.167	1772.05	0.055929	1.82357	0.097818	7.93388	0.015521
S2 spike	92	106	FASTEKSNIIRGWIF			14	1768.94	S2_FL_complex	1.667	1772.6	0.121696	2.37546	0.145775	7.93898	0.007527
S2 spike	92	106	FASTEKSNIIRGWIF			14	1768.94	S2_FL_complex	16.667	1773.03	0.074738	2.81104	0.109663	7.93395	0.01754
S2 spike	92	106	FASTEKSNIIRGWIF			14	1768.94	S2_FL_complex	166.667	1773.55	0.151361	3.32681	0.17132	7.92385	0.007238
S2 spike	93	106	ASTEKSNIIRGWIF			13	1621.87	S2_3A3Fab_complex	0	1622.88	0.033448	0	0	7.85671	0.018254
S2 spike	93	106	ASTEKSNIIRGWIF			13	1621.87	S2_3A3Fab_complex	0.167	1624.71	0.042623	1.83811	0.05418	7.88657	0.001112
S2 spike	93	106	ASTEKSNIIRGWIF			13	1621.87	S2_3A3Fab_complex	1.667	1625.43	0.191247	2.55356	0.19415	7.88391	0.01018
S2 spike	93	106	ASTEKSNIIRGWIF			13	1621.87	S2_3A3Fab_complex	16.667	1625.76	0.106981	2.88591	0.112088	7.86397	0.015321
S2 spike	93	106	ASTEKSNIIRGWIF			13	1621.87	S2_3A3Fab_complex	166.667	1626.2	0.15711	3.31867	0.160631	7.8767	0.009902
S2 spike	93	106	ASTEKSNIIRGWIF			13	1621.87	S2_Alone	0	1622.88	0.033448	0	0	7.85671	0.018254
S2 spike	93	106	ASTEKSNIIRGWIF			13	1621.87	S2_Alone	0.167	1624.85	0.205921	1.97685	0.20862	7.85839	0.01593
S2 spike	93	106	ASTEKSNIIRGWIF			13	1621.87	S2_Alone	1.667	1625.35	0.207164	2.47201	0.209847	7.86394	0.020772
S2 spike	93	106	ASTEKSNIIRGWIF			13	1621.87	S2_Alone	16.667	1625.75	0.093143	2.87729	0.098966	7.877	0.006191
S2 spike	93	106	ASTEKSNIIRGWIF			13	1621.87	S2_Alone	166.667	1626.21	0.144801	3.33585	0.148614	7.86022	0.022413
S2 spike	93	106	ASTEKSNIIRGWIF			13	1621.87	S2_FL_complex	0	1622.88	0.033448	0	0	7.85671	0.018254
S2 spike	93	106	ASTEKSNIIRGWIF			13	1621.87	S2_FL_complex	0.167	1624.85	0.16228	1.97018	0.165691	7.87347	0.019297
S2 spike	93	106	ASTEKSNIIRGWIF			13	1621.87	S2_FL_complex	1.667	1625.23	0.222052	2.3562	0.224557	7.87514	0.00892
S2 spike	93	106	ASTEKSNIIRGWIF			13	1621.87	S2_FL_complex	16.667	1625.83	0.200872	2.95189	0.203638	7.86771	0.019961
S2 spike	93	106	ASTEKSNIIRGWIF			13	1621.87	S2_FL_complex	166.667	1626.16	0.225922	3.27994	0.228384	7.86959	0.009943
S2 spike	95	103	TEKSNIIRG			8	1017.57	S2_3A3Fab_complex	0	1018.12	0.046456	0	0	5.64444	0.058459
S2 spike	95	103	TEKSNIIRG			8	1017.57	S2_3A3Fab_complex	0.167	1020.07	0.090028	1.9528	0.101308	5.71376	0.002741
S2 spike	95	103	TEKSNIIRG			8	1017.57	S2_3A3Fab_complex	1.667	1020.54	0.09409	2.41386	0.104934	5.7173	0.00876
S2 spike	95	103	TEKSNIIRG			8	1017.57	S2_3A3Fab_complex	16.667	1021.03	0.057876	2.91184	0.074215	5.67375	0.063321
S2 spike	95	103	TEKSNIIRG			8	1017.57	S2_3A3Fab_complex	166.667	1021.4	0.114382	3.27827	0.123456	5.7246	0.015459
S2 spike	95	103	TEKSNIIRG			8	1017.57	S2_Alone	0	1018.12	0.046456	0	0	5.64444	0.058459
S2 spike	95	103	TEKSNIIRG			8	1017.57	S2_Alone	0.167	1020.12	0.036123	2.00115	0.058848	5.67574	0.053429
S2 spike	95	103	TEKSNIIRG			8	1017.57	S2_Alone	1.667	1020.5	0.175474	2.3775	0.18152	5.66317	0.079192
S2 spike	95	103	TEKSNIIRG			8	1017.57	S2_Alone	16.667	1021.01	0.076848	2.88472	0.089799	5.71649	0.018615
S2 spike	95	103	TEKSNIIRG			8	1017.57	S2_Alone	166.667	1021.4	0.134624	3.28218	0.142414	5.64891	0.070369
S2 spike	95	103	TEKSNIIRG			8	1017.57	S2_FL_complex	0	1018.12	0.046456	0	0	5.64444	0.058459
S2 spike	95	103	TEKSNIIRG			8	1017.57	S2_FL_complex	0.167	1020.05	0.049704	1.93152	0.068034	5.69459	0.059671
S2 spike	95	103	TEKSNIIRG			8	1017.57	S2_FL_complex	1.667	1020.51	0.177934	2.39136	0.183899	5.71499	0.019661
S2 spike	95	103	TEKSNIIRG			8	1017.57	S2_FL_complex	16.667	1020.98	0.067475	2.86197	0.081921	5.68225	0.066759
S2 spike	95	103	TEKSNIIRG			8	1017.57	S2_FL_complex	166.667	1021.35	0.058273	3.22676	0.074525	5.66824	0.05015
S2 spike	96	103	EKSNIIRG			7	916.521	S2_3A3Fab_complex	0	917.034	0.051274	0	0	5.54052	0.065337
S2 spike	96	103	EKSNIIRG			7	916.521	S2_3A3Fab_complex	0.167	917.965	0.032111	0.930919	0.060499	5.61674	0.002935
S2 spike	96	103	EKSNIIRG			7	916.521	S2_3A3Fab_complex	1.667	918.55	0.033328	1.51626	0.061153	5.61793	0.005748
S2 spike	96	103	EKSNIIRG			7	916.521	S2_3A3Fab_complex	16.667	919.041	0.059317	2.00786	0.078406	5.57092	0.067745
S2 spike	96	103	EKSNIIRG			7	916.521	S2_3A3Fab_complex	166.667	919.384	0.002065	2.35054	0.051315	5.60688	0.003069
S2 spike	96	103	EKSNIIRG			7	916.521	S2_Alone	0	917.034	0.051274	0	0	5.54052	0.065337
S2 spike	96	103	EKSNIIRG			7	916.521	S2_Alone	0.167	917.982	0.064722	0.948253	0.082571	5.57325	0.057936
S2 spike	96	103	EKSNIIRG			7	916.521	S2_Alone	1.667	918.56	0.104869	1.52602	0.116732	5.51808	0.069581
S2 spike	96	103	EKSNIIRG			7	916.521	S2_Alone	16.667	919.062	0.068604	2.02843	0.085647	5.60796	0.015006
S2 spike	96	103	EKSNIIRG			7	916.521	S2_Alone	166.667	919.441	0.07231	2.40758	0.088644	5.50864	0.060827
S2 spike	96	103	EKSNIIRG			7	916.521	S2_FL_complex	0	917.034	0.051274	0	0	5.54052	0.065337
S2 spike	96	103	EKSNIIRG			7	916.521	S2_FL_complex	0.167	918.043	0.038942	1.00934	0.064385	5.57228	0.067778
S2 spike	96	103	EKSNIIRG			7	916.521	S2_FL_complex	1.667	918.575	0.05153	1.54163	0.072693	5.60848	0.010316
S2 spike	96	103	EKSNIIRG			7	916.521	S2_FL_complex	16.667	919.035	0.075529	2.00166	0.091288	5.57802	0.069205
S2 spike	96	103	EKSNIIRG			7	916.521	S2_FL_complex	166.667	919.446	0.054862	2.41195	0.075092	5.56773	0.054351
S2 spike	97	106	KSNIIRGWIF			9	1233.71	S2_3A3Fab_complex	0	1234.41	0.029314	0	0	7.81753	0.02159
S2 spike	97	106	KSNIIRGWIF			9	1233.71	S2_3A3Fab_complex	0.167	1234.96	0.017546	0.547088	0.034164	7.84689	0.001482
S2 spike	97	106	KSNIIRGWIF			9	1233.71	S2_3A3Fab_complex	1.667	1235.47	0.044564	1.06203	0.053341	7.83995	0.009202
S2 spike	97	106	KSNIIRGWIF			9	1233.71	S2_3A3Fab_complex	16.667	1235.98	0.053644	1.56798	0.061131	7.82192	0.016511
S2 spike	97	106	KSNIIRGWIF			9	1233.71	S2_3A3Fab_complex	166.667	1236.29	0.070685	1.87739	0.076523	7.83908	0.010658
S2 spike	97	106	KSNIIRGWIF			9	1233.71	S2_Alone	0	1234.41	0.029314	0	0	7.81753	0.02159
S2 spike	97	106	KSNIIRGWIF			9	1233.71	S2_Alone	0.167	1235	0.072725	0.58426	0.078411	7.81914	0.019259
S2 spike	97	106	KSNIIRGWIF			9	1233.71	S2_Alone	1.667	1235.48	0.051513	1.06486	0.05927	7.82461	0.023459
S2 spike	97	106	KSNIIRGWIF			9	1233.71	S2_Alone	16.667	1235.97	0.038002	1.56158	0.047995	7.83595	0.006081
S2 spike	97	106	KSNIIRGWIF			9	1233.71	S2_Alone	166.667	1236.33	0.046202	1.92218	0.054717	7.81706	0.022918
S2 spike	97	106	KSNIIRGWIF			9	1233.71	S2_FL_complex	0	1234.41	0.029314	0	0	7.81753	0.02159
S2 spike	97	106	KSNIIRGWIF			9	1233.71	S2_FL_complex	0.167	1234.98	0.018272	0.571418	0.034543	7.83303	0.020212
S2 spike	97	106	KSNIIRGWIF			9	1233.71	S2_FL_complex	1.667	1235.45	0.034118	1.03393	0.044982	7.83782	0.01085
S2 spike	97	106	KSNIIRGWIF			9	1233.71	S2_FL_complex	16.667	1235.98	0.056254	1.56944	0.063434	7.82958	0.019618
S2 spike	97	106	KSNIIRGWIF			9	1233.71	S2_FL_complex	166.667	1236.34	0.025398	1.92777	0.038787	7.81937	0.009371
S2 spike	99	106	NIIRGWIF			7	1018.58	S2_3A3Fab_complex	0	1019.21	0.026472	0	0	8.30525	0.009785
S2 spike	99	106	NIIRGWIF			7	1018.58	S2_3A3Fab_complex	0.167	1019.36	0.014972	0.147507	0.030413	8.30772	0.00332
S2 spike	99	106	NIIRGWIF			7	1018.58	S2_3A3Fab_complex	1.667	1019.54	0.023758	0.326932	0.03557	8.30134	0.01075
S2 spike	99	106	NIIRGWIF			7	1018.58	S2_3A3Fab_complex	16.667	1020.03	0.057759	0.820519	0.063536	8.30015	0.006169
S2 spike	99	106	NIIRGWIF			7	1018.58	S2_3A3Fab_complex	166.667	1020.31	0.081192	1.09805	0.085398	8.30144	0.013799
S2 spike	99	106	NIIRGWIF			7	1018.58	S2_Alone	0	1019.21	0.026472	0	0	8.30525	0.009785
S2 spike	99	106	NIIRGWIF			7	1018.58	S2_Alone	0.167	1019.4	0.066302	0.194413	0.071391	8.29733	0.014283
S2 spike	99	106	NIIRGWIF			7	1018.58	S2_Alone	1.667	1019.51	0.070013	0.297986	0.074851	8.30166	0.008642
S2 spike	99	106	NIIRGWIF			7	1018.58	S2_Alone	16.667	1020.02	0.035339	0.816565	0.044154	8.30788	0.008384
S2 spike	99	106	NIIRGWIF			7	1018.58	S2_Alone	166.667	1020.31	0.052853	1.0985	0.059112	8.30544	0.014166
S2 spike	99	106	NIIRGWIF			7	1018.58	S2_FL_complex	0	1019.21	0.026472	0	0	8.30525	0.009785
S2 spike	99	106	NIIRGWIF			7	1018.58	S2_FL_complex	0.167	1019.38	0.045428	0.174485	0.052578	8.30375	0.010225
S2 spike	99	106	NIIRGWIF			7	1018.58	S2_FL_complex	1.667	1019.5	0.031795	0.28945	0.041373	8.29965	0.011302
S2 spike	99	106	NIIRGWIF			7	1018.58	S2_FL_complex	16.667	1020	0.033452	0.794037	0.042659	8.3035	0.003948
S2 spike	99	106	NIIRGWIF			7	1018.58	S2_FL_complex	166.667	1020.36	0.025565	1.1485	0.036801	8.28635	0.007747
S2 spike	104	110	WIFGTTL			6	837.451	S2_3A3Fab_complex	0	838.27	0.042514	0	0	8.66648	0.005689
S2 spike	104	110	WIFGTTL			6	837.451	S2_3A3Fab_complex	0.167	838.563	0.031778	0.293764	0.053078	8.66629	0.003024
S2 spike	104	110	WIFGTTL			6	837.451	S2_3A3Fab_complex	1.667	838.76	0.014695	0.490265	0.044982	8.65154	0.016733
S2 spike	104	110	WIFGTTL			6	837.451	S2_3A3Fab_complex	16.667	839.507	0.07589	1.23733	0.086987	8.65444	0.008883
S2 spike	104	110	WIFGTTL			6	837.451	S2_3A3Fab_complex	166.667	839.912	0.062595	1.64198	0.075668	8.65014	0.021595
S2 spike	104	110	WIFGTTL			6	837.451	S2_Alone	0	838.314	0.080106	0	0	8.66634	0.005948
S2 spike	104	110	WIFGTTL			6	837.451	S2_Alone	0.167	838.556	0.100262	0.241674	0.128334	8.65592	0.021019
S2 spike	104	110	WIFGTTL			6	837.451	S2_Alone	1.667	838.741	0.149899	0.427312	0.169961	8.65745	0.0133
S2 spike	104	110	WIFGTTL			6	837.451	S2_Alone	16.667	839.475	0.050407	1.16042	0.094646	8.65967	0.007432
S2 spike	104	110	WIFGTTL			6	837.451	S2_Alone	166.667	839.935	0.080179	1.62087	0.113339	8.66819	0.009785
S2 spike	104	110	WIFGTTL			6	837.451	S2_FL_complex	0	838.329	0.084969	0	0	8.66857	0.004788
S2 spike	104	110	WIFGTTL			6	837.451	S2_FL_complex	0.167	838.632	0.032857	0.302524	0.091101	8.6612	0.014933
S2 spike	104	110	WIFGTTL			6	837.451	S2_FL_complex	1.667	838.74	0.155338	0.41106	0.177058	8.65045	0.016408
S2 spike	104	110	WIFGTTL			6	837.451	S2_FL_complex	16.667	839.503	0.036682	1.17386	0.092549	8.66118	0.005545
S2 spike	104	110	WIFGTTL			6	837.451	S2_FL_complex	166.667	839.946	0.045554	1.61724	0.09641	8.64018	0.015284
S2 spike	107	117	GTTLDSKTQSL			10	1150.6	S2_3A3Fab_complex	0	1151.14	0.006867	0	0	6.35035	0.046581
S2 spike	107	117	GTTLDSKTQSL			10	1150.6	S2_3A3Fab_complex	0.167	1151.96	0.048556	0.820494	0.049039	6.41447	0.002362
S2 spike	107	117	GTTLDSKTQSL			10	1150.6	S2_3A3Fab_complex	1.667	1152.69	0.038732	1.55701	0.039336	6.41372	0.006217
S2 spike	107	117	GTTLDSKTQSL			10	1150.6	S2_3A3Fab_complex	16.667	1153.42	0.066118	2.28255	0.066474	6.37121	0.05257
S2 spike	107	117	GTTLDSKTQSL			10	1150.6	S2_3A3Fab_complex	166.667	1153.99	0.046604	2.85274	0.047107	6.41407	0.013569
S2 spike	107	117	GTTLDSKTQSL			10	1150.6	S2_Alone	0	1151.14	0.006867	0	0	6.35035	0.046581
S2 spike	107	117	GTTLDSKTQSL			10	1150.6	S2_Alone	0.167	1151.97	0.044071	0.835165	0.044603	6.37153	0.042995
S2 spike	107	117	GTTLDSKTQSL			10	1150.6	S2_Alone	1.667	1152.7	0.086947	1.56824	0.087218	6.37992	0.06189
S2 spike	107	117	GTTLDSKTQSL			10	1150.6	S2_Alone	16.667	1153.52	0.120501	2.38391	0.120696	6.41273	0.013999
S2 spike	107	117	GTTLDSKTQSL			10	1150.6	S2_Alone	166.667	1154.08	0.197121	2.93912	0.19724	6.35108	0.052175
S2 spike	107	117	GTTLDSKTQSL			10	1150.6	S2_FL_complex	0	1151.14	0.006867	0	0	6.35035	0.046581
S2 spike	107	117	GTTLDSKTQSL			10	1150.6	S2_FL_complex	0.167	1152.05	0.031697	0.908927	0.032432	6.37355	0.048634
S2 spike	107	117	GTTLDSKTQSL			10	1150.6	S2_FL_complex	1.667	1152.78	0.087671	1.6474	0.08794	6.38403	0.014426
S2 spike	107	117	GTTLDSKTQSL			10	1150.6	S2_FL_complex	16.667	1153.42	0.059447	2.28779	0.059842	6.36503	0.053069
S2 spike	107	117	GTTLDSKTQSL			10	1150.6	S2_FL_complex	166.667	1154.04	0.137838	2.90412	0.138009	6.35069	0.036501
S2 spike	111	117	DSKTQSL			6	778.394	S2_3A3Fab_complex	0	779.056	0.074277	0	0	5.88808	0.054725
S2 spike	111	117	DSKTQSL			6	778.394	S2_3A3Fab_complex	0.167	779.363	0.022984	0.306996	0.077752	5.96481	0.004973
S2 spike	111	117	DSKTQSL			6	778.394	S2_3A3Fab_complex	1.667	779.694	0.032517	0.637459	0.081083	5.96549	0.005438
S2 spike	111	117	DSKTQSL			6	778.394	S2_3A3Fab_complex	16.667	779.906	0.017961	0.849327	0.076418	5.89678	0.054895
S2 spike	111	117	DSKTQSL			6	778.394	S2_3A3Fab_complex	166.667	780.051	0.008049	0.994489	0.074712	5.9701	0.015638
S2 spike	111	117	DSKTQSL			6	778.394	S2_Alone	0	779.081	0.103594	0	0	5.89013	0.055039
S2 spike	111	117	DSKTQSL			6	778.394	S2_Alone	0.167	779.415	0.058551	0.334079	0.118996	5.91845	0.04778
S2 spike	111	117	DSKTQSL			6	778.394	S2_Alone	1.667	779.672	0.048455	0.590914	0.114366	5.93463	0.073564
S2 spike	111	117	DSKTQSL			6	778.394	S2_Alone	16.667	779.883	0.039522	0.802294	0.110877	5.96179	0.017316
S2 spike	111	117	DSKTQSL			6	778.394	S2_Alone	166.667	780.086	0.074033	1.00551	0.127329	5.88694	0.06611
S2 spike	111	117	DSKTQSL			6	778.394	S2_FL_complex	0	779.081	0.103594	0	0	5.89013	0.055039
S2 spike	111	117	DSKTQSL			6	778.394	S2_FL_complex	0.167	779.367	0.035987	0.286273	0.109667	5.93897	0.061726
S2 spike	111	117	DSKTQSL			6	778.394	S2_FL_complex	1.667	779.657	0.055338	0.576278	0.117448	5.96204	0.017898
S2 spike	111	117	DSKTQSL			6	778.394	S2_FL_complex	16.667	779.856	0.041783	0.775198	0.111703	5.92701	0.067389
S2 spike	111	117	DSKTQSL			6	778.394	S2_FL_complex	166.667	780.092	0.035212	1.01116	0.109415	5.9168	0.048368
S2 spike	111	118	DSKTQSLL			7	891.478	S2_3A3Fab_complex	0	891.973	0.024126	0	0	6.90654	0.038344
S2 spike	111	118	DSKTQSLL			7	891.478	S2_3A3Fab_complex	0.167	892.417	0.008625	0.443698	0.025622	6.95617	0.002466
S2 spike	111	118	DSKTQSLL			7	891.478	S2_3A3Fab_complex	1.667	892.791	0.006075	0.817875	0.02488	6.95861	0.008404
S2 spike	111	118	DSKTQSLL			7	891.478	S2_3A3Fab_complex	16.667	892.946	0.038367	0.972969	0.045322	6.92288	0.041462
S2 spike	111	118	DSKTQSLL			7	891.478	S2_3A3Fab_complex	166.667	893.075	0.0192	1.10231	0.030834	6.95723	0.010568
S2 spike	111	118	DSKTQSLL			7	891.478	S2_Alone	0	891.973	0.024126	0	0	6.90654	0.038344
S2 spike	111	118	DSKTQSLL			7	891.478	S2_Alone	0.167	892.424	0.033761	0.451163	0.041496	6.92473	0.036317
S2 spike	111	118	DSKTQSLL			7	891.478	S2_Alone	1.667	892.803	0.049248	0.830244	0.05484	6.93195	0.048511
S2 spike	111	118	DSKTQSLL			7	891.478	S2_Alone	16.667	892.971	0.023716	0.998298	0.033831	6.95708	0.010792
S2 spike	111	118	DSKTQSLL			7	891.478	S2_Alone	166.667	893.028	0.110175	1.05498	0.112786	6.90724	0.043655
S2 spike	111	118	DSKTQSLL			7	891.478	S2_FL_complex	0	891.973	0.024126	0	0	6.90654	0.038344
S2 spike	111	118	DSKTQSLL			7	891.478	S2_FL_complex	0.167	892.403	0.027327	0.43004	0.036454	6.93944	0.041822
S2 spike	111	118	DSKTQSLL			7	891.478	S2_FL_complex	1.667	892.682	0.0477	0.709252	0.053454	6.95885	0.012845
S2 spike	111	118	DSKTQSLL			7	891.478	S2_FL_complex	16.667	892.804	0.048796	0.831563	0.054435	6.93853	0.045864
S2 spike	111	118	DSKTQSLL			7	891.478	S2_FL_complex	166.667	892.96	0.077482	0.986724	0.081151	6.9265	0.031729
S2 spike	170	176	YVSQPFL			5	853.445	S2_3A3Fab_complex	0	854.042	0.034161	0	0	7.94728	0.018412
S2 spike	170	176	YVSQPFL			5	853.445	S2_3A3Fab_complex	0.167	855.798	0.07381	1.75609	0.081332	7.96987	0.003076
S2 spike	170	176	YVSQPFL			5	853.445	S2_3A3Fab_complex	1.667	856.292	0.061468	2.2503	0.070323	7.96795	0.010111
S2 spike	170	176	YVSQPFL			5	853.445	S2_3A3Fab_complex	16.667	856.216	0.078448	2.17429	0.085563	7.95336	0.016908
S2 spike	170	176	YVSQPFL			5	853.445	S2_3A3Fab_complex	166.667	856.271	0.060285	2.22887	0.069291	7.96396	0.013269
S2 spike	170	176	YVSQPFL			5	853.445	S2_Alone	0	854.042	0.034161	0	0	7.94728	0.018412
S2 spike	170	176	YVSQPFL			5	853.445	S2_Alone	0.167	855.799	0.067338	1.75685	0.075508	7.94937	0.019017
S2 spike	170	176	YVSQPFL			5	853.445	S2_Alone	1.667	856.327	0.038687	2.28486	0.051611	7.95356	0.021959
S2 spike	170	176	YVSQPFL			5	853.445	S2_Alone	16.667	856.227	0.046823	2.18472	0.05796	7.96284	0.007547
S2 spike	170	176	YVSQPFL			5	853.445	S2_Alone	166.667	856.241	0.056076	2.19904	0.065662	7.9404	0.020563
S2 spike	170	176	YVSQPFL			5	853.445	S2_FL_complex	0	854.042	0.034161	0	0	7.94728	0.018412
S2 spike	170	176	YVSQPFL			5	853.445	S2_FL_complex	0.167	855.802	0.030617	1.75959	0.045873	7.95847	0.017964
S2 spike	170	176	YVSQPFL			5	853.445	S2_FL_complex	1.667	856.34	0.065484	2.29761	0.073859	7.96402	0.00904
S2 spike	170	176	YVSQPFL			5	853.445	S2_FL_complex	16.667	856.255	0.082213	2.21297	0.089028	7.95278	0.022052
S2 spike	170	176	YVSQPFL			5	853.445	S2_FL_complex	166.667	856.243	0.075503	2.20056	0.082871	7.945	0.011911
S2 spike	177	186	MDLEGKQGNF			9	1138.52	S2_3A3Fab_complex	0	1139.11	0.042504	0	0	6.89429	0.039475
S2 spike	177	186	MDLEGKQGNF			9	1138.52	S2_3A3Fab_complex	0.167	1143.39	0.048089	4.27549	0.064181	6.93037	0.003551
S2 spike	177	186	MDLEGKQGNF			9	1138.52	S2_3A3Fab_complex	1.667	1143.27	0.100968	4.15829	0.10955	6.93276	0.009042
S2 spike	177	186	MDLEGKQGNF			9	1138.52	S2_3A3Fab_complex	16.667	1143.3	0.12566	4.18872	0.132654	6.90821	0.038332
S2 spike	177	186	MDLEGKQGNF			9	1138.52	S2_3A3Fab_complex	166.667	1143.33	0.04567	4.21566	0.062389	6.92959	0.009564
S2 spike	177	186	MDLEGKQGNF			9	1138.52	S2_Alone	0	1139.11	0.042504	0	0	6.89429	0.039475
S2 spike	177	186	MDLEGKQGNF			9	1138.52	S2_Alone	0.167	1143.39	0.131659	4.27637	0.13835	6.91104	0.033286
S2 spike	177	186	MDLEGKQGNF			9	1138.52	S2_Alone	1.667	1143.34	0.100028	4.23234	0.108684	6.92261	0.044219
S2 spike	177	186	MDLEGKQGNF			9	1138.52	S2_Alone	16.667	1143.29	0.064555	4.17795	0.077292	6.93593	0.012258
S2 spike	177	186	MDLEGKQGNF			9	1138.52	S2_Alone	166.667	1143.37	0.077984	4.26195	0.088815	6.89865	0.04629
S2 spike	177	186	MDLEGKQGNF			9	1138.52	S2_FL_complex	0	1139.11	0.042504	0	0	6.89429	0.039475
S2 spike	177	186	MDLEGKQGNF			9	1138.52	S2_FL_complex	0.167	1143.33	0.104484	4.21786	0.112799	6.91069	0.042547
S2 spike	177	186	MDLEGKQGNF			9	1138.52	S2_FL_complex	1.667	1143.27	0.129323	4.16307	0.136129	6.92802	0.017831
S2 spike	177	186	MDLEGKQGNF			9	1138.52	S2_FL_complex	16.667	1143.31	0.081833	4.20378	0.092213	6.91012	0.039823
S2 spike	177	186	MDLEGKQGNF			9	1138.52	S2_FL_complex	166.667	1143.39	0.117084	4.28337	0.12456	6.89599	0.02685
S2 spike	177	191	MDLEGKQGNFKNLRE			14	1778.89	S2_3A3Fab_complex	0	1780.35	0.084442	0	0	6.39455	0.02987
S2 spike	177	191	MDLEGKQGNFKNLRE			14	1778.89	S2_3A3Fab_complex	0.167	1785.01	0.050886	4.66108	0.098589	6.45787	0.00309
S2 spike	177	191	MDLEGKQGNFKNLRE			14	1778.89	S2_3A3Fab_complex	1.667	1785.45	0.112737	5.10157	0.140855	6.4616	0.0053
S2 spike	177	191	MDLEGKQGNFKNLRE			14	1778.89	S2_3A3Fab_complex	16.667	1786.22	0.130444	5.87461	0.15539	6.41901	0.050442
S2 spike	177	191	MDLEGKQGNFKNLRE			14	1778.89	S2_3A3Fab_complex	166.667	1786.72	0.036608	6.37083	0.092036	6.46134	0.010412
S2 spike	177	191	MDLEGKQGNFKNLRE			14	1778.89	S2_Alone	0	1780.35	0.084442	0	0	6.39455	0.02987
S2 spike	177	191	MDLEGKQGNFKNLRE			14	1778.89	S2_Alone	0.167	1785.03	0.134349	4.68435	0.158682	6.41936	0.043065
S2 spike	177	191	MDLEGKQGNFKNLRE			14	1778.89	S2_Alone	1.667	1785.31	0.093406	4.96229	0.125917	6.43369	0.056971
S2 spike	177	191	MDLEGKQGNFKNLRE			14	1778.89	S2_Alone	16.667	1786.15	0.108666	5.80084	0.137618	6.45744	0.010707
S2 spike	177	191	MDLEGKQGNFKNLRE			14	1778.89	S2_Alone	166.667	1786.88	0.152097	6.53578	0.173965	6.39867	0.052377
S2 spike	177	191	MDLEGKQGNFKNLRE			14	1778.89	S2_FL_complex	0	1780.47	0.132726	0	0	6.41444	0.041482
S2 spike	177	191	MDLEGKQGNFKNLRE			14	1778.89	S2_FL_complex	0.167	1784.88	0.044375	4.40867	0.139947	6.43751	0.047484
S2 spike	177	191	MDLEGKQGNFKNLRE			14	1778.89	S2_FL_complex	1.667	1785.32	0.204547	4.85343	0.243835	6.45385	0.017228
S2 spike	177	191	MDLEGKQGNFKNLRE			14	1778.89	S2_FL_complex	16.667	1786.15	0.076629	5.68235	0.153258	6.43199	0.052482
S2 spike	177	191	MDLEGKQGNFKNLRE			14	1778.89	S2_FL_complex	166.667	1786.86	0.170328	6.39185	0.215935	6.41566	0.038604
S2 spike	179	191	LEGKQGNFKNLRE			12	1532.82	S2_3A3Fab_complex	0	1533.7	0.046401	0	0	5.87341	0.054739
S2 spike	179	191	LEGKQGNFKNLRE			12	1532.82	S2_3A3Fab_complex	0.167	1537.49	0.110004	3.79091	0.11939	5.96178	0.005686
S2 spike	179	191	LEGKQGNFKNLRE			12	1532.82	S2_3A3Fab_complex	1.667	1537.72	0.100109	4.02164	0.11034	5.95879	0.007294
S2 spike	179	191	LEGKQGNFKNLRE			12	1532.82	S2_3A3Fab_complex	16.667	1538.38	0.052883	4.68356	0.070353	5.90706	0.059106
S2 spike	179	191	LEGKQGNFKNLRE			12	1532.82	S2_3A3Fab_complex	166.667	1539.08	0.096871	5.3796	0.107411	5.95999	0.016741
S2 spike	179	191	LEGKQGNFKNLRE			12	1532.82	S2_Alone	0	1533.7	0.046401	0	0	5.87341	0.054739
S2 spike	179	191	LEGKQGNFKNLRE			12	1532.82	S2_Alone	0.167	1537.5	0.184776	3.80317	0.190513	5.91514	0.049734
S2 spike	179	191	LEGKQGNFKNLRE			12	1532.82	S2_Alone	1.667	1537.81	0.132785	4.11124	0.140659	5.92515	0.069251
S2 spike	179	191	LEGKQGNFKNLRE			12	1532.82	S2_Alone	16.667	1538.4	0.104338	4.69795	0.11419	5.95578	0.020042
S2 spike	179	191	LEGKQGNFKNLRE			12	1532.82	S2_Alone	166.667	1539.21	0.052359	5.50711	0.069961	5.88659	0.064568
S2 spike	179	191	LEGKQGNFKNLRE			12	1532.82	S2_FL_complex	0	1533.7	0.046401	0	0	5.87341	0.054739
S2 spike	179	191	LEGKQGNFKNLRE			12	1532.82	S2_FL_complex	0.167	1537.36	0.084341	3.6599	0.096263	5.94398	0.056621
S2 spike	179	191	LEGKQGNFKNLRE			12	1532.82	S2_FL_complex	1.667	1537.74	0.034397	4.04523	0.05776	5.96765	0.020563
S2 spike	179	191	LEGKQGNFKNLRE			12	1532.82	S2_FL_complex	16.667	1538.27	0.082946	4.57265	0.095042	5.92422	0.065165
S2 spike	179	191	LEGKQGNFKNLRE			12	1532.82	S2_FL_complex	166.667	1539.07	0.127577	5.36788	0.135753	5.9206	0.046374
S2 spike	180	191	EGKQGNFKNLRE			11	1419.73	S2_3A3Fab_complex	0	1420.49	0.051659	0	0	6.40071	0.046496
S2 spike	180	191	EGKQGNFKNLRE			11	1419.73	S2_3A3Fab_complex	0.167	1424.61	0.033023	4.12042	0.061312	6.46306	0.002824
S2 spike	180	191	EGKQGNFKNLRE			11	1419.73	S2_3A3Fab_complex	1.667	1424.77	0.062512	4.28228	0.081095	6.46534	0.007173
S2 spike	180	191	EGKQGNFKNLRE			11	1419.73	S2_3A3Fab_complex	16.667	1425.34	0.11571	4.85653	0.126718	6.426	0.051041
S2 spike	180	191	EGKQGNFKNLRE			11	1419.73	S2_3A3Fab_complex	166.667	1425.86	0.135413	5.36991	0.144932	6.46511	0.012348
S2 spike	180	191	EGKQGNFKNLRE			11	1419.73	S2_Alone	0	1420.49	0.051659	0	0	6.40071	0.046496
S2 spike	180	191	EGKQGNFKNLRE			11	1419.73	S2_Alone	0.167	1424.62	0.065871	4.13225	0.083712	6.42263	0.041952
S2 spike	180	191	EGKQGNFKNLRE			11	1419.73	S2_Alone	1.667	1424.64	0.129891	4.15033	0.139787	6.43063	0.059106
S2 spike	180	191	EGKQGNFKNLRE			11	1419.73	S2_Alone	16.667	1425.4	0.122441	4.91068	0.132892	6.45985	0.012381
S2 spike	180	191	EGKQGNFKNLRE			11	1419.73	S2_Alone	166.667	1425.98	0.193569	5.49482	0.200343	6.40245	0.05285
S2 spike	180	191	EGKQGNFKNLRE			11	1419.73	S2_FL_complex	0	1420.49	0.051659	0	0	6.40071	0.046496
S2 spike	180	191	EGKQGNFKNLRE			11	1419.73	S2_FL_complex	0.167	1424.53	0.131853	4.04462	0.141612	6.42674	0.052334
S2 spike	180	191	EGKQGNFKNLRE			11	1419.73	S2_FL_complex	1.667	1424.7	0.137893	4.21036	0.147252	6.4532	0.01667
S2 spike	180	191	EGKQGNFKNLRE			11	1419.73	S2_FL_complex	16.667	1425.38	0.103989	4.89638	0.116114	6.42816	0.056739
S2 spike	180	191	EGKQGNFKNLRE			11	1419.73	S2_FL_complex	166.667	1425.92	0.16041	5.43758	0.168523	6.42218	0.037552
S2 spike	181	191	GKQGNFKNLRE			10	1290.69	S2_3A3Fab_complex	0	1291.51	0.058404	0	0	5.74266	0.05939
S2 spike	181	191	GKQGNFKNLRE			10	1290.69	S2_3A3Fab_complex	0.167	1293.81	0.063168	2.29552	0.08603	5.81644	0.002093
S2 spike	181	191	GKQGNFKNLRE			10	1290.69	S2_3A3Fab_complex	1.667	1294.26	0.147012	2.74293	0.158188	5.81979	0.002776
S2 spike	181	191	GKQGNFKNLRE			10	1290.69	S2_3A3Fab_complex	16.667	1295.04	0.089665	3.52393	0.107009	5.77382	0.054553
S2 spike	181	191	GKQGNFKNLRE			10	1290.69	S2_3A3Fab_complex	166.667	1295.6	0.043887	4.0865	0.073055	5.80202	0.001385
S2 spike	181	191	GKQGNFKNLRE			10	1290.69	S2_Alone	0	1291.51	0.058404	0	0	5.74266	0.05939
S2 spike	181	191	GKQGNFKNLRE			10	1290.69	S2_Alone	0.167	1293.86	0.091144	2.34558	0.10825	5.77776	0.05187
S2 spike	181	191	GKQGNFKNLRE			10	1290.69	S2_Alone	1.667	1294.22	0.166825	2.70734	0.176753	5.76224	0.070452
S2 spike	181	191	GKQGNFKNLRE			10	1290.69	S2_Alone	16.667	1295.04	0.072642	3.52619	0.093208	5.80112	0.00886
S2 spike	181	191	GKQGNFKNLRE			10	1290.69	S2_Alone	166.667	1295.68	0.070557	4.16814	0.091593	5.72781	0.056671
S2 spike	181	191	GKQGNFKNLRE			10	1290.69	S2_FL_complex	0	1291.51	0.058404	0	0	5.74266	0.05939
S2 spike	181	191	GKQGNFKNLRE			10	1290.69	S2_FL_complex	0.167	1293.72	0.051385	2.21015	0.077791	5.76112	0.055936
S2 spike	181	191	GKQGNFKNLRE			10	1290.69	S2_FL_complex	1.667	1294.18	0.072141	2.6641	0.092818	5.81393	0.014518
S2 spike	181	191	GKQGNFKNLRE			10	1290.69	S2_FL_complex	16.667	1294.96	0.110042	3.44499	0.12458	5.76043	0.067203
S2 spike	181	191	GKQGNFKNLRE			10	1290.69	S2_FL_complex	166.667	1295.62	0.086041	4.11005	0.103991	5.78025	0.045313
S2 spike	192	199	FVFKNIDG			7	939.493	S2_3A3Fab_complex	0	940.061	0.01593	0	0	7.13189	0.034123
S2 spike	192	199	FVFKNIDG			7	939.493	S2_3A3Fab_complex	0.167	941.098	0.001808	1.03711	0.016032	7.17101	0.002538
S2 spike	192	199	FVFKNIDG			7	939.493	S2_3A3Fab_complex	1.667	941.679	0.016263	1.61789	0.022765	7.16919	0.0109
S2 spike	192	199	FVFKNIDG			7	939.493	S2_3A3Fab_complex	16.667	942.236	0.07079	2.17524	0.07256	7.14594	0.034981
S2 spike	192	199	FVFKNIDG			7	939.493	S2_3A3Fab_complex	166.667	942.193	0.039959	2.13211	0.043018	7.1645	0.003609
S2 spike	192	199	FVFKNIDG			7	939.493	S2_Alone	0	940.061	0.01593	0	0	7.13189	0.034123
S2 spike	192	199	FVFKNIDG			7	939.493	S2_Alone	0.167	941.13	0.072414	1.06897	0.074146	7.14811	0.028588
S2 spike	192	199	FVFKNIDG			7	939.493	S2_Alone	1.667	941.648	0.002168	1.5877	0.016077	7.12476	0.032377
S2 spike	192	199	FVFKNIDG			7	939.493	S2_Alone	16.667	942.182	0.052219	2.12149	0.054595	7.17284	0.013239
S2 spike	192	199	FVFKNIDG			7	939.493	S2_Alone	166.667	942.256	0.073405	2.19477	0.075113	7.13706	0.037984
S2 spike	192	199	FVFKNIDG			7	939.493	S2_FL_complex	0	940.061	0.01593	0	0	7.13189	0.034123
S2 spike	192	199	FVFKNIDG			7	939.493	S2_FL_complex	0.167	941.098	0.091814	1.03748	0.093186	7.15798	0.034329
S2 spike	192	199	FVFKNIDG			7	939.493	S2_FL_complex	1.667	941.616	0.005857	1.55549	0.016973	7.17136	0.020879
S2 spike	192	199	FVFKNIDG			7	939.493	S2_FL_complex	16.667	942.171	0.020086	2.11062	0.025636	7.12915	0.039231
S2 spike	192	199	FVFKNIDG			7	939.493	S2_FL_complex	166.667	942.169	0.088874	2.10832	0.090291	7.14592	0.025124
S2 spike	192	200	FVFKNIDGY			8	1102.56	S2_3A3Fab_complex	0	1103.48	0.10514	0	0	7.48001	0.023912
S2 spike	192	200	FVFKNIDGY			8	1102.56	S2_3A3Fab_complex	0.167	1104.64	0.061888	1.15746	0.122003	7.51171	0.001351
S2 spike	192	200	FVFKNIDGY			8	1102.56	S2_3A3Fab_complex	1.667	1105.14	0.062557	1.65188	0.122343	7.507	0.010918
S2 spike	192	200	FVFKNIDGY			8	1102.56	S2_3A3Fab_complex	16.667	1105.63	0.039006	2.14707	0.112143	7.48771	0.023779
S2 spike	192	200	FVFKNIDGY			8	1102.56	S2_3A3Fab_complex	166.667	1106.07	0.050026	2.58311	0.116435	7.50834	0.013284
S2 spike	192	200	FVFKNIDGY			8	1102.56	S2_Alone	0	1103.44	0.035196	0	0	7.47995	0.024085
S2 spike	192	200	FVFKNIDGY			8	1102.56	S2_Alone	0.167	1104.65	0.044871	1.211	0.057028	7.48636	0.022145
S2 spike	192	200	FVFKNIDGY			8	1102.56	S2_Alone	1.667	1105.1	0.071401	1.66447	0.079604	7.49473	0.029869
S2 spike	192	200	FVFKNIDGY			8	1102.56	S2_Alone	16.667	1105.64	0.077163	2.20045	0.084811	7.50786	0.010609
S2 spike	192	200	FVFKNIDGY			8	1102.56	S2_Alone	166.667	1105.99	0.089582	2.55693	0.096248	7.48162	0.028658
S2 spike	192	200	FVFKNIDGY			8	1102.56	S2_FL_complex	0	1103.44	0.035196	0	0	7.47995	0.024085
S2 spike	192	200	FVFKNIDGY			8	1102.56	S2_FL_complex	0.167	1104.58	0.029611	1.14581	0.045995	7.49881	0.025826
S2 spike	192	200	FVFKNIDGY			8	1102.56	S2_FL_complex	1.667	1105.06	0.042201	1.61893	0.054952	7.50518	0.014312
S2 spike	192	200	FVFKNIDGY			8	1102.56	S2_FL_complex	16.667	1105.59	0.041166	2.15084	0.054161	7.49328	0.026639
S2 spike	192	200	FVFKNIDGY			8	1102.56	S2_FL_complex	166.667	1106.05	0.058634	2.60839	0.068387	7.48403	0.014147
S2 spike	192	201	FVFKNIDGYF			9	1249.63	S2_3A3Fab_complex	0	1250.43	0.037229	0	0	8.02993	0.021529
S2 spike	192	201	FVFKNIDGYF			9	1249.63	S2_3A3Fab_complex	0.167	1251.66	0.016335	1.23029	0.040655	8.05173	0.00226
S2 spike	192	201	FVFKNIDGYF			9	1249.63	S2_3A3Fab_complex	1.667	1252.3	0.060029	1.87048	0.070636	8.03964	0.01189
S2 spike	192	201	FVFKNIDGYF			9	1249.63	S2_3A3Fab_complex	16.667	1252.85	0.091813	2.42189	0.099074	8.02962	0.014127
S2 spike	192	201	FVFKNIDGYF			9	1249.63	S2_3A3Fab_complex	166.667	1253.24	0.099682	2.80424	0.106407	8.03932	0.015141
S2 spike	192	201	FVFKNIDGYF			9	1249.63	S2_Alone	0	1250.43	0.037229	0	0	8.02993	0.021529
S2 spike	192	201	FVFKNIDGYF			9	1249.63	S2_Alone	0.167	1251.73	0.095896	1.29815	0.102869	8.02406	0.020171
S2 spike	192	201	FVFKNIDGYF			9	1249.63	S2_Alone	1.667	1252.25	0.118896	1.81646	0.124588	8.03283	0.019895
S2 spike	192	201	FVFKNIDGYF			9	1249.63	S2_Alone	16.667	1252.83	0.071628	2.40287	0.080725	8.04594	0.008646
S2 spike	192	201	FVFKNIDGYF			9	1249.63	S2_Alone	166.667	1253.27	0.111265	2.83408	0.117329	8.03018	0.023381
S2 spike	192	201	FVFKNIDGYF			9	1249.63	S2_FL_complex	0	1250.43	0.037229	0	0	8.02993	0.021529
S2 spike	192	201	FVFKNIDGYF			9	1249.63	S2_FL_complex	0.167	1251.71	0.016826	1.2826	0.040855	8.04033	0.017593
S2 spike	192	201	FVFKNIDGYF			9	1249.63	S2_FL_complex	1.667	1252.25	0.04409	1.81562	0.057705	8.04028	0.013602
S2 spike	192	201	FVFKNIDGYF			9	1249.63	S2_FL_complex	16.667	1252.85	0.040638	2.41735	0.055113	8.03679	0.017754
S2 spike	192	201	FVFKNIDGYF			9	1249.63	S2_FL_complex	166.667	1253.31	0.039107	2.88083	0.053994	8.01762	0.002813
S2 spike	193	201	VFKNIDGYF			8	1102.56	S2_3A3Fab_complex	0	1103.04	0.092492	0	0	8.03553	0.019982
S2 spike	193	201	VFKNIDGYF			8	1102.56	S2_3A3Fab_complex	0.167	1104.32	0.042641	1.27854	0.101848	8.05387	0.0023
S2 spike	193	201	VFKNIDGYF			8	1102.56	S2_3A3Fab_complex	1.667	1104.89	0.084043	1.84829	0.124972	8.04412	0.010935
S2 spike	193	201	VFKNIDGYF			8	1102.56	S2_3A3Fab_complex	16.667	1105.38	0.098418	2.34653	0.135059	8.0347	0.013347
S2 spike	193	201	VFKNIDGYF			8	1102.56	S2_3A3Fab_complex	166.667	1105.8	0.116546	2.76431	0.148787	8.04434	0.015017
S2 spike	193	201	VFKNIDGYF			8	1102.56	S2_Alone	0	1103.04	0.092492	0	0	8.03553	0.019982
S2 spike	193	201	VFKNIDGYF			8	1102.56	S2_Alone	0.167	1104.37	0.088191	1.33108	0.127799	8.03357	0.020024
S2 spike	193	201	VFKNIDGYF			8	1102.56	S2_Alone	1.667	1104.83	0.115308	1.78727	0.14782	8.03849	0.019668
S2 spike	193	201	VFKNIDGYF			8	1102.56	S2_Alone	16.667	1105.38	0.072002	2.3385	0.117214	8.04762	0.007753
S2 spike	193	201	VFKNIDGYF			8	1102.56	S2_Alone	166.667	1105.82	0.099077	2.78352	0.13554	8.0354	0.021892
S2 spike	193	201	VFKNIDGYF			8	1102.56	S2_FL_complex	0	1103.04	0.092492	0	0	8.03553	0.019982
S2 spike	193	201	VFKNIDGYF			8	1102.56	S2_FL_complex	0.167	1104.37	0.018792	1.33639	0.094382	8.04319	0.017095
S2 spike	193	201	VFKNIDGYF			8	1102.56	S2_FL_complex	1.667	1104.86	0.051369	1.81807	0.1058	8.04582	0.01603
S2 spike	193	201	VFKNIDGYF			8	1102.56	S2_FL_complex	16.667	1105.38	0.023095	2.33793	0.095332	8.04234	0.017199
S2 spike	193	201	VFKNIDGYF			8	1102.56	S2_FL_complex	166.667	1105.85	0.069208	2.8142	0.115518	8.02653	0.0091
S2 spike	194	200	FKNIDGY			6	856.42	S2_3A3Fab_complex	0	856.845	0.020296	0	0	7.4856	0.023885
S2 spike	194	200	FKNIDGY			6	856.42	S2_3A3Fab_complex	0.167	857.962	0.00451	1.11701	0.020791	7.51274	0.002838
S2 spike	194	200	FKNIDGY			6	856.42	S2_3A3Fab_complex	1.667	858.426	0.023581	1.58033	0.031112	7.51401	0.002789
S2 spike	194	200	FKNIDGY			6	856.42	S2_3A3Fab_complex	16.667	858.855	0	2.00954	0.020296	7.51768	0
S2 spike	194	200	FKNIDGY			6	856.42	S2_3A3Fab_complex	166.667	859.228	0.074952	2.38289	0.077651	7.51093	0.013408
S2 spike	194	200	FKNIDGY			6	856.42	S2_Alone	0	856.845	0.020296	0	0	7.4856	0.023885
S2 spike	194	200	FKNIDGY			6	856.42	S2_Alone	0.167	858.01	0.0632	1.16438	0.066379	7.50661	0.011306
S2 spike	194	200	FKNIDGY			6	856.42	S2_Alone	1.667	858.411	0.057032	1.56532	0.060535	7.49967	0.030564
S2 spike	194	200	FKNIDGY			6	856.42	S2_Alone	16.667	858.891	0.049386	2.04592	0.053394	7.51063	0.011103
S2 spike	194	200	FKNIDGY			6	856.42	S2_Alone	166.667	859.282	0.073971	2.43646	0.076705	7.48497	0.029229
S2 spike	194	200	FKNIDGY			6	856.42	S2_FL_complex	0	856.845	0.020296	0	0	7.4856	0.023885
S2 spike	194	200	FKNIDGY			6	856.42	S2_FL_complex	0.167	857.939	0.053918	1.09365	0.057611	7.50088	0.025567
S2 spike	194	200	FKNIDGY			6	856.42	S2_FL_complex	1.667	858.445	0.045193	1.59969	0.049541	7.51226	0.008319
S2 spike	194	200	FKNIDGY			6	856.42	S2_FL_complex	16.667	858.902	0.060674	2.05672	0.063978	7.49759	0.028633
S2 spike	194	200	FKNIDGY			6	856.42	S2_FL_complex	166.667	859.314	0.038391	2.46835	0.043426	7.47393	0.010536
S2 spike	194	201	FKNIDGYF			7	1003.49	S2_3A3Fab_complex	0	1004.06	0.011124	0	0	8.03408	0.020598
S2 spike	194	201	FKNIDGYF			7	1003.49	S2_3A3Fab_complex	0.167	1005.17	0.017681	1.10902	0.020889	8.0586	0.001791
S2 spike	194	201	FKNIDGYF			7	1003.49	S2_3A3Fab_complex	1.667	1005.74	0.055128	1.67296	0.056239	8.04797	0.012499
S2 spike	194	201	FKNIDGYF			7	1003.49	S2_3A3Fab_complex	16.667	1006.23	0.08179	2.16769	0.082543	8.03862	0.014562
S2 spike	194	201	FKNIDGYF			7	1003.49	S2_3A3Fab_complex	166.667	1006.56	0.079411	2.49365	0.080186	8.04984	0.015084
S2 spike	194	201	FKNIDGYF			7	1003.49	S2_Alone	0	1004.06	0.011124	0	0	8.03408	0.020598
S2 spike	194	201	FKNIDGYF			7	1003.49	S2_Alone	0.167	1005.21	0.090577	1.1459	0.091257	8.03361	0.01953
S2 spike	194	201	FKNIDGYF			7	1003.49	S2_Alone	1.667	1005.67	0.109462	1.60359	0.110026	8.03916	0.019806
S2 spike	194	201	FKNIDGYF			7	1003.49	S2_Alone	16.667	1006.2	0.071773	2.13338	0.07263	8.04939	0.008221
S2 spike	194	201	FKNIDGYF			7	1003.49	S2_Alone	166.667	1006.57	0.102156	2.50187	0.10276	8.0346	0.021824
S2 spike	194	201	FKNIDGYF			7	1003.49	S2_FL_complex	0	1004.06	0.011124	0	0	8.03408	0.020598
S2 spike	194	201	FKNIDGYF			7	1003.49	S2_FL_complex	0.167	1005.23	0.034946	1.17052	0.036674	8.04573	0.017362
S2 spike	194	201	FKNIDGYF			7	1003.49	S2_FL_complex	1.667	1005.72	0.03417	1.65647	0.035935	8.05253	0.003394
S2 spike	194	201	FKNIDGYF			7	1003.49	S2_FL_complex	16.667	1006.28	0.051423	2.21113	0.052612	8.04182	0.017099
S2 spike	194	201	FKNIDGYF			7	1003.49	S2_FL_complex	166.667	1006.61	0.062285	2.54178	0.063271	8.02772	0.008934
S2 spike	195	201	KNIDGYF			6	856.42	S2_3A3Fab_complex	0	856.835	0.010161	0	0	7.28811	0.030706
S2 spike	195	201	KNIDGYF			6	856.42	S2_3A3Fab_complex	0.167	857.98	0.071402	1.14462	0.072121	7.32144	0.003016
S2 spike	195	201	KNIDGYF			6	856.42	S2_3A3Fab_complex	1.667	858.347	0.089455	1.51225	0.09003	7.31548	0.006623
S2 spike	195	201	KNIDGYF			6	856.42	S2_3A3Fab_complex	16.667	858.805	0.062574	1.96935	0.063393	7.29378	0.031187
S2 spike	195	201	KNIDGYF			6	856.42	S2_3A3Fab_complex	166.667	859.174	0.063043	2.33835	0.063856	7.31953	0.013109
S2 spike	195	201	KNIDGYF			6	856.42	S2_Alone	0	856.835	0.010161	0	0	7.28811	0.030706
S2 spike	195	201	KNIDGYF			6	856.42	S2_Alone	0.167	858.063	0.020404	1.22784	0.022794	7.29606	0.028175
S2 spike	195	201	KNIDGYF			6	856.42	S2_Alone	1.667	858.346	0.044839	1.51096	0.045976	7.30266	0.038438
S2 spike	195	201	KNIDGYF			6	856.42	S2_Alone	16.667	858.838	0.048068	2.00276	0.04913	7.32049	0.009759
S2 spike	195	201	KNIDGYF			6	856.42	S2_Alone	166.667	859.231	0.056665	2.39561	0.057569	7.2877	0.036101
S2 spike	195	201	KNIDGYF			6	856.42	S2_FL_complex	0	856.835	0.010161	0	0	7.28811	0.030706
S2 spike	195	201	KNIDGYF			6	856.42	S2_FL_complex	0.167	858.022	0.089535	1.1867	0.09011	7.30817	0.03116
S2 spike	195	201	KNIDGYF			6	856.42	S2_FL_complex	1.667	858.319	0.090607	1.48395	0.091175	7.31789	0.015188
S2 spike	195	201	KNIDGYF			6	856.42	S2_FL_complex	16.667	858.894	0.019996	2.05906	0.022429	7.30097	0.035824
S2 spike	195	201	KNIDGYF			6	856.42	S2_FL_complex	166.667	859.166	0.038293	2.33075	0.039618	7.29108	0.019734
S2 spike	200	212	YFKIYSKHTPINL			11	1623.89	S2_3A3Fab_complex	0	1624.86	0.019039	0	0	6.88073	0.037235
S2 spike	200	212	YFKIYSKHTPINL			11	1623.89	S2_3A3Fab_complex	0.167	1626.25	0.012574	1.39546	0.022816	6.92285	0.003058
S2 spike	200	212	YFKIYSKHTPINL			11	1623.89	S2_3A3Fab_complex	1.667	1626.91	0.063822	2.05151	0.066601	6.92087	0.010298
S2 spike	200	212	YFKIYSKHTPINL			11	1623.89	S2_3A3Fab_complex	16.667	1627.08	0.095638	2.21984	0.097515	6.88984	0.039044
S2 spike	200	212	YFKIYSKHTPINL			11	1623.89	S2_3A3Fab_complex	166.667	1627.13	0.074831	2.27237	0.077215	6.91962	0.012688
S2 spike	200	212	YFKIYSKHTPINL			11	1623.89	S2_Alone	0	1624.86	0.019039	0	0	6.88073	0.037235
S2 spike	200	212	YFKIYSKHTPINL			11	1623.89	S2_Alone	0.167	1626.32	0.042755	1.46046	0.046802	6.89168	0.036834
S2 spike	200	212	YFKIYSKHTPINL			11	1623.89	S2_Alone	1.667	1626.86	0.060069	2.00865	0.063014	6.90085	0.046659
S2 spike	200	212	YFKIYSKHTPINL			11	1623.89	S2_Alone	16.667	1627.09	0.04977	2.23022	0.053287	6.9251	0.010307
S2 spike	200	212	YFKIYSKHTPINL			11	1623.89	S2_Alone	166.667	1627.2	0.082754	2.34337	0.084915	6.87802	0.044482
S2 spike	200	212	YFKIYSKHTPINL			11	1623.89	S2_FL_complex	0	1624.86	0.019039	0	0	6.88073	0.037235
S2 spike	200	212	YFKIYSKHTPINL			11	1623.89	S2_FL_complex	0.167	1626.23	0.077283	1.37563	0.079594	6.90419	0.038358
S2 spike	200	212	YFKIYSKHTPINL			11	1623.89	S2_FL_complex	1.667	1626.84	0.03893	1.97948	0.043337	6.91633	0.014666
S2 spike	200	212	YFKIYSKHTPINL			11	1623.89	S2_FL_complex	16.667	1627.05	0.016429	2.19845	0.025147	6.9011	0.0421
S2 spike	200	212	YFKIYSKHTPINL			11	1623.89	S2_FL_complex	166.667	1627.14	0.054974	2.27894	0.058178	6.88741	0.024211
S2 spike	201	212	FKIYSKHTPINL			10	1460.83	S2_3A3Fab_complex	0	1461.77	0.030624	0	0	6.68567	0.042554
S2 spike	201	212	FKIYSKHTPINL			10	1460.83	S2_3A3Fab_complex	0.167	1463.11	0.012616	1.33672	0.033121	6.73845	0.000595
S2 spike	201	212	FKIYSKHTPINL			10	1460.83	S2_3A3Fab_complex	1.667	1463.74	0.021627	1.97218	0.037491	6.73872	0.00918
S2 spike	201	212	FKIYSKHTPINL			10	1460.83	S2_3A3Fab_complex	16.667	1463.93	0.029565	2.16257	0.042567	6.70027	0.042387
S2 spike	201	212	FKIYSKHTPINL			10	1460.83	S2_3A3Fab_complex	166.667	1463.91	0.042368	2.13871	0.052277	6.7371	0.012438
S2 spike	201	212	FKIYSKHTPINL			10	1460.83	S2_Alone	0	1461.77	0.030624	0	0	6.68567	0.042554
S2 spike	201	212	FKIYSKHTPINL			10	1460.83	S2_Alone	0.167	1463.14	0.039887	1.37155	0.050287	6.70424	0.039965
S2 spike	201	212	FKIYSKHTPINL			10	1460.83	S2_Alone	1.667	1463.72	0.069808	1.94862	0.076229	6.71381	0.051766
S2 spike	201	212	FKIYSKHTPINL			10	1460.83	S2_Alone	16.667	1463.91	0.03742	2.14281	0.048353	6.74325	0.010191
S2 spike	201	212	FKIYSKHTPINL			10	1460.83	S2_Alone	166.667	1464.02	0.062682	2.25061	0.069762	6.68915	0.044523
S2 spike	201	212	FKIYSKHTPINL			10	1460.83	S2_FL_complex	0	1461.77	0.030624	0	0	6.68567	0.042554
S2 spike	201	212	FKIYSKHTPINL			10	1460.83	S2_FL_complex	0.167	1463.07	0.040031	1.29665	0.050401	6.71858	0.043101
S2 spike	201	212	FKIYSKHTPINL			10	1460.83	S2_FL_complex	1.667	1463.63	0.038667	1.85914	0.049325	6.73213	0.014526
S2 spike	201	212	FKIYSKHTPINL			10	1460.83	S2_FL_complex	16.667	1463.88	0.036267	2.11349	0.047467	6.70885	0.047874
S2 spike	201	212	FKIYSKHTPINL			10	1460.83	S2_FL_complex	166.667	1463.92	0.069468	2.15431	0.075919	6.69875	0.029915
S2 spike	204	212	YSKHTPINL			7	1072.58	S2_3A3Fab_complex	0	1073.12	0.028091	0	0	6.21261	0.050862
S2 spike	204	212	YSKHTPINL			7	1072.58	S2_3A3Fab_complex	0.167	1074.28	0.09604	1.15734	0.100064	6.27502	0.001263
S2 spike	204	212	YSKHTPINL			7	1072.58	S2_3A3Fab_complex	1.667	1074.74	0.075639	1.61474	0.080687	6.27692	0.00801
S2 spike	204	212	YSKHTPINL			7	1072.58	S2_3A3Fab_complex	16.667	1074.95	0.079043	1.82998	0.083886	6.23419	0.053472
S2 spike	204	212	YSKHTPINL			7	1072.58	S2_3A3Fab_complex	166.667	1075.01	0.034462	1.88675	0.044461	6.2745	0.014057
S2 spike	204	212	YSKHTPINL			7	1072.58	S2_Alone	0	1073.12	0.028091	0	0	6.21261	0.050862
S2 spike	204	212	YSKHTPINL			7	1072.58	S2_Alone	0.167	1074.26	0.008767	1.13919	0.029428	6.23562	0.04311
S2 spike	204	212	YSKHTPINL			7	1072.58	S2_Alone	1.667	1074.74	0.023182	1.62051	0.036422	6.24298	0.062154
S2 spike	204	212	YSKHTPINL			7	1072.58	S2_Alone	16.667	1074.94	0.060037	1.81299	0.066284	6.27495	0.015063
S2 spike	204	212	YSKHTPINL			7	1072.58	S2_Alone	166.667	1075.05	0.054878	1.92405	0.06165	6.21805	0.054663
S2 spike	204	212	YSKHTPINL			7	1072.58	S2_FL_complex	0	1073.12	0.028091	0	0	6.21261	0.050862
S2 spike	204	212	YSKHTPINL			7	1072.58	S2_FL_complex	0.167	1074.23	0.066765	1.10814	0.072434	6.25217	0.053575
S2 spike	204	212	YSKHTPINL			7	1072.58	S2_FL_complex	1.667	1074.68	0.062576	1.55838	0.068593	6.27897	0.012927
S2 spike	204	212	YSKHTPINL			7	1072.58	S2_FL_complex	16.667	1074.89	0.078487	1.77154	0.083362	6.25112	0.057358
S2 spike	204	212	YSKHTPINL			7	1072.58	S2_FL_complex	166.667	1074.99	0.09948	1.87264	0.10337	6.23651	0.039495
S2 spike	213	220	VRDLPQGF			6	931.5	S2_3A3Fab_complex	0	932.003	0.016571	0	0	7.05602	0.035825
S2 spike	213	220	VRDLPQGF			6	931.5	S2_3A3Fab_complex	0.167	934.036	0.061096	2.03339	0.063303	7.09989	0.001705
S2 spike	213	220	VRDLPQGF			6	931.5	S2_3A3Fab_complex	1.667	934.477	0.040747	2.47474	0.043988	7.09888	0.008117
S2 spike	213	220	VRDLPQGF			6	931.5	S2_3A3Fab_complex	16.667	934.423	0.089142	2.42049	0.09067	7.07025	0.036803
S2 spike	213	220	VRDLPQGF			6	931.5	S2_3A3Fab_complex	166.667	934.437	0.008131	2.43481	0.018458	7.10067	0.011846
S2 spike	213	220	VRDLPQGF			6	931.5	S2_Alone	0	932.003	0.016571	0	0	7.05602	0.035825
S2 spike	213	220	VRDLPQGF			6	931.5	S2_Alone	0.167	934.108	0.052245	2.10583	0.05481	7.06869	0.032695
S2 spike	213	220	VRDLPQGF			6	931.5	S2_Alone	1.667	934.461	0.073391	2.45828	0.075238	7.0748	0.044425
S2 spike	213	220	VRDLPQGF			6	931.5	S2_Alone	16.667	934.395	0.046647	2.39195	0.049503	7.09734	0.010517
S2 spike	213	220	VRDLPQGF			6	931.5	S2_Alone	166.667	934.477	0.089416	2.47459	0.090938	7.05577	0.039708
S2 spike	213	220	VRDLPQGF			6	931.5	S2_FL_complex	0	932.003	0.016571	0	0	7.05602	0.035825
S2 spike	213	220	VRDLPQGF			6	931.5	S2_FL_complex	0.167	934.073	0.057329	2.07041	0.059676	7.08366	0.036471
S2 spike	213	220	VRDLPQGF			6	931.5	S2_FL_complex	1.667	934.491	0.063614	2.48878	0.065737	7.09564	0.012632
S2 spike	213	220	VRDLPQGF			6	931.5	S2_FL_complex	16.667	934.415	0.100978	2.41228	0.102329	7.07628	0.040797
S2 spike	213	220	VRDLPQGF			6	931.5	S2_FL_complex	166.667	934.472	0.066961	2.46893	0.068981	7.06666	0.025832
S2 spike	213	223	VRDLPQGFSAL			9	1202.65	S2_3A3Fab_complex	0	1203.59	0.015455	0	0	7.46166	0.024634
S2 spike	213	223	VRDLPQGFSAL			9	1202.65	S2_3A3Fab_complex	0.167	1206.28	0.08843	2.68611	0.089771	7.49798	0.000749
S2 spike	213	223	VRDLPQGFSAL			9	1202.65	S2_3A3Fab_complex	1.667	1207.07	0.066929	3.47845	0.06869	7.49226	0.008829
S2 spike	213	223	VRDLPQGFSAL			9	1202.65	S2_3A3Fab_complex	16.667	1206.9	0.129164	3.30919	0.130085	7.47493	0.025255
S2 spike	213	223	VRDLPQGFSAL			9	1202.65	S2_3A3Fab_complex	166.667	1207.01	0.122602	3.41831	0.123572	7.49538	0.010517
S2 spike	213	223	VRDLPQGFSAL			9	1202.65	S2_Alone	0	1203.59	0.015455	0	0	7.46166	0.024634
S2 spike	213	223	VRDLPQGFSAL			9	1202.65	S2_Alone	0.167	1206.37	0.092267	2.77596	0.093552	7.47172	0.023725
S2 spike	213	223	VRDLPQGFSAL			9	1202.65	S2_Alone	1.667	1207.02	0.098537	3.43206	0.099741	7.48048	0.031852
S2 spike	213	223	VRDLPQGFSAL			9	1202.65	S2_Alone	16.667	1206.94	0.108628	3.34651	0.109722	7.49472	0.008287
S2 spike	213	223	VRDLPQGFSAL			9	1202.65	S2_Alone	166.667	1207.06	0.140396	3.46807	0.141244	7.46715	0.0302
S2 spike	213	223	VRDLPQGFSAL			9	1202.65	S2_FL_complex	0	1203.59	0.015455	0	0	7.46166	0.024634
S2 spike	213	223	VRDLPQGFSAL			9	1202.65	S2_FL_complex	0.167	1206.3	0.066516	2.70328	0.068288	7.48274	0.025643
S2 spike	213	223	VRDLPQGFSAL			9	1202.65	S2_FL_complex	1.667	1207.01	0.099866	3.4171	0.101055	7.48942	0.013381
S2 spike	213	223	VRDLPQGFSAL			9	1202.65	S2_FL_complex	16.667	1206.92	0.06969	3.33056	0.071383	7.47808	0.026638
S2 spike	213	223	VRDLPQGFSAL			9	1202.65	S2_FL_complex	166.667	1207.06	0.079908	3.46615	0.081389	7.46621	0.014417
S2 spike	221	228	SALEPLVD			6	843.446	S2_3A3Fab_complex	0	843.852	0.017786	0	0	7.42212	0.029839
S2 spike	221	228	SALEPLVD			6	843.446	S2_3A3Fab_complex	0.167	844.245	0.04587	0.392133	0.049197	7.45662	0.002114
S2 spike	221	228	SALEPLVD			6	843.446	S2_3A3Fab_complex	1.667	844.394	0.054389	0.541682	0.057224	7.45362	0.008788
S2 spike	221	228	SALEPLVD			6	843.446	S2_3A3Fab_complex	16.667	844.836	0.033082	0.983378	0.03756	7.43715	0.029773
S2 spike	221	228	SALEPLVD			6	843.446	S2_3A3Fab_complex	166.667	845.615	0.08856	1.76226	0.090329	7.45366	0.01102
S2 spike	221	228	SALEPLVD			6	843.446	S2_Alone	0	843.852	0.017786	0	0	7.42212	0.029839
S2 spike	221	228	SALEPLVD			6	843.446	S2_Alone	0.167	844.295	0.064505	0.442675	0.066912	7.43482	0.029669
S2 spike	221	228	SALEPLVD			6	843.446	S2_Alone	1.667	844.387	0.033916	0.53473	0.038296	7.43855	0.035254
S2 spike	221	228	SALEPLVD			6	843.446	S2_Alone	16.667	844.887	0.043454	1.0343	0.046953	7.45324	0.009406
S2 spike	221	228	SALEPLVD			6	843.446	S2_Alone	166.667	845.654	0.088019	1.80116	0.089798	7.42133	0.035316
S2 spike	221	228	SALEPLVD			6	843.446	S2_FL_complex	0	843.852	0.017786	0	0	7.42212	0.029839
S2 spike	221	228	SALEPLVD			6	843.446	S2_FL_complex	0.167	844.288	0.066121	0.435817	0.068471	7.44177	0.028502
S2 spike	221	228	SALEPLVD			6	843.446	S2_FL_complex	1.667	844.355	0.039105	0.502357	0.04296	7.45488	0.014248
S2 spike	221	228	SALEPLVD			6	843.446	S2_FL_complex	16.667	844.881	0.007839	1.02833	0.019437	7.43142	0.03236
S2 spike	221	228	SALEPLVD			6	843.446	S2_FL_complex	166.667	845.572	0.0666	1.71929	0.068934	7.41673	0.020003
S2 spike	221	229	SALEPLVDL			7	956.53	S2_3A3Fab_complex	0	957.019	0.014995	0	0	8.18845	0.016236
S2 spike	221	229	SALEPLVDL			7	956.53	S2_3A3Fab_complex	0.167	957.449	0.018238	0.429864	0.023611	8.20283	0.001783
S2 spike	221	229	SALEPLVDL			7	956.53	S2_3A3Fab_complex	1.667	957.603	0.042637	0.584211	0.045197	8.19648	0.011495
S2 spike	221	229	SALEPLVDL			7	956.53	S2_3A3Fab_complex	16.667	958.067	0.090582	1.04761	0.091815	8.18637	0.011514
S2 spike	221	229	SALEPLVDL			7	956.53	S2_3A3Fab_complex	166.667	959.276	0.0971	2.25703	0.098251	8.19343	0.014942
S2 spike	221	229	SALEPLVDL			7	956.53	S2_Alone	0	957.019	0.014995	0	0	8.18845	0.016236
S2 spike	221	229	SALEPLVDL			7	956.53	S2_Alone	0.167	957.538	0.036761	0.518784	0.039702	8.18724	0.017
S2 spike	221	229	SALEPLVDL			7	956.53	S2_Alone	1.667	957.584	0.026376	0.564852	0.03034	8.19208	0.015044
S2 spike	221	229	SALEPLVDL			7	956.53	S2_Alone	16.667	958.071	0.052517	1.0521	0.054616	8.19828	0.006616
S2 spike	221	229	SALEPLVDL			7	956.53	S2_Alone	166.667	959.243	0.09979	2.22406	0.10091	8.18541	0.01717
S2 spike	221	229	SALEPLVDL			7	956.53	S2_FL_complex	0	957.019	0.014995	0	0	8.18845	0.016236
S2 spike	221	229	SALEPLVDL			7	956.53	S2_FL_complex	0.167	957.487	0.046339	0.467905	0.048705	8.19412	0.01449
S2 spike	221	229	SALEPLVDL			7	956.53	S2_FL_complex	1.667	957.575	0.023584	0.555584	0.027948	8.19499	0.011669
S2 spike	221	229	SALEPLVDL			7	956.53	S2_FL_complex	16.667	958.048	0.050762	1.0293	0.05293	8.18982	0.013144
S2 spike	221	229	SALEPLVDL			7	956.53	S2_FL_complex	166.667	959.296	0.070223	2.27652	0.071807	8.17615	0.007611
S2 spike	242	265	LALHRSYLTPGDSSSGWTAGAAAY			22	2452.19	S2_3A3Fab_complex	0	2453.86	0.023235	0	0	7.1023	0.030459
S2 spike	242	265	LALHRSYLTPGDSSSGWTAGAAAY			22	2452.19	S2_3A3Fab_complex	0.167	2461.95	0.094985	8.08385	0.097786	7.14416	0.002406
S2 spike	242	265	LALHRSYLTPGDSSSGWTAGAAAY			22	2452.19	S2_3A3Fab_complex	1.667	2462.65	0.171689	8.78433	0.173254	7.14067	0.008233
S2 spike	242	265	LALHRSYLTPGDSSSGWTAGAAAY			22	2452.19	S2_3A3Fab_complex	16.667	2462.79	0.081444	8.92672	0.084693	7.11613	0.032413
S2 spike	242	265	LALHRSYLTPGDSSSGWTAGAAAY			22	2452.19	S2_3A3Fab_complex	166.667	2462.92	0.165786	9.06089	0.167406	7.13991	0.010807
S2 spike	242	265	LALHRSYLTPGDSSSGWTAGAAAY			22	2452.19	S2_Alone	0	2453.85	0.029835	0	0	7.10263	0.030521
S2 spike	242	265	LALHRSYLTPGDSSSGWTAGAAAY			22	2452.19	S2_Alone	0.167	2462.18	0.076989	8.3291	0.082568	7.11132	0.027691
S2 spike	242	265	LALHRSYLTPGDSSSGWTAGAAAY			22	2452.19	S2_Alone	1.667	2462.63	0.123959	8.7839	0.127499	7.12158	0.039649
S2 spike	242	265	LALHRSYLTPGDSSSGWTAGAAAY			22	2452.19	S2_Alone	16.667	2462.8	0.185391	8.95362	0.187777	7.1419	0.00755
S2 spike	242	265	LALHRSYLTPGDSSSGWTAGAAAY			22	2452.19	S2_Alone	166.667	2463.08	0.202655	9.23249	0.20484	7.10127	0.036306
S2 spike	242	265	LALHRSYLTPGDSSSGWTAGAAAY			22	2452.19	S2_FL_complex	0	2453.85	0.029835	0	0	7.10263	0.030521
S2 spike	242	265	LALHRSYLTPGDSSSGWTAGAAAY			22	2452.19	S2_FL_complex	0.167	2461.95	0.145415	8.10423	0.148444	7.11815	0.02954
S2 spike	242	265	LALHRSYLTPGDSSSGWTAGAAAY			22	2452.19	S2_FL_complex	1.667	2462.59	0.151975	8.74442	0.154876	7.13759	0.013533
S2 spike	242	265	LALHRSYLTPGDSSSGWTAGAAAY			22	2452.19	S2_FL_complex	16.667	2462.66	0.108404	8.80891	0.112435	7.12384	0.033824
S2 spike	242	265	LALHRSYLTPGDSSSGWTAGAAAY			22	2452.19	S2_FL_complex	166.667	2463.05	0.128197	9.20226	0.131623	7.12169	0.007639
S2 spike	243	264	ALHRSYLTPGDSSSGWTAGAAA			20	2176.04	S2_3A3Fab_complex	0	2177	0	0	0	6.73599	0
S2 spike	243	264	ALHRSYLTPGDSSSGWTAGAAA			20	2176.04	S2_3A3Fab_complex	0.167	2185.19	0.039922	8.19402	0.039922	6.81838	0.003091
S2 spike	243	264	ALHRSYLTPGDSSSGWTAGAAA			20	2176.04	S2_3A3Fab_complex	1.667	2185.36	0.186926	8.36576	0.186926	6.81886	0.007997
S2 spike	243	264	ALHRSYLTPGDSSSGWTAGAAA			20	2176.04	S2_3A3Fab_complex	16.667	2185.37	0.077587	8.37481	0.077587	6.78876	0.042462
S2 spike	243	264	ALHRSYLTPGDSSSGWTAGAAA			20	2176.04	S2_3A3Fab_complex	166.667	2185.35	0.160535	8.35232	0.160535	6.82259	0.013144
S2 spike	243	264	ALHRSYLTPGDSSSGWTAGAAA			20	2176.04	S2_Alone	0	2177.3	0.044575	0	0	6.76991	0.039929
S2 spike	243	264	ALHRSYLTPGDSSSGWTAGAAA			20	2176.04	S2_Alone	0.167	2185.35	0.093074	8.04657	0.103197	6.78467	0.036316
S2 spike	243	264	ALHRSYLTPGDSSSGWTAGAAA			20	2176.04	S2_Alone	1.667	2185.52	0.09071	8.21788	0.101071	6.79331	0.049183
S2 spike	243	264	ALHRSYLTPGDSSSGWTAGAAA			20	2176.04	S2_Alone	16.667	2185.53	0.147297	8.23279	0.153894	6.81465	0.012808
S2 spike	243	264	ALHRSYLTPGDSSSGWTAGAAA			20	2176.04	S2_Alone	166.667	2185.47	0.252907	8.16727	0.256805	6.78669	0.045353
S2 spike	243	264	ALHRSYLTPGDSSSGWTAGAAA			20	2176.04	S2_FL_complex	0	2177.3	0.044575	0	0	6.76991	0.039929
S2 spike	243	264	ALHRSYLTPGDSSSGWTAGAAA			20	2176.04	S2_FL_complex	0.167	2185.15	0.266055	7.85359	0.269763	6.80011	0.041115
S2 spike	243	264	ALHRSYLTPGDSSSGWTAGAAA			20	2176.04	S2_FL_complex	1.667	2185.44	0.244279	8.14138	0.248312	6.81422	0.016215
S2 spike	243	264	ALHRSYLTPGDSSSGWTAGAAA			20	2176.04	S2_FL_complex	16.667	2185.5	0.285414	8.20388	0.288873	6.79364	0.044932
S2 spike	243	264	ALHRSYLTPGDSSSGWTAGAAA			20	2176.04	S2_FL_complex	166.667	2185.54	0.298256	8.24535	0.301568	6.78413	0.026641
S2 spike	243	265	ALHRSYLTPGDSSSGWTAGAAAY			21	2339.11	S2_3A3Fab_complex	0	2340.35	0.049883	0	0	7.05979	0.018003
S2 spike	243	265	ALHRSYLTPGDSSSGWTAGAAAY			21	2339.11	S2_3A3Fab_complex	0.167	2348.2	0.088621	7.85933	0.101696	7.06178	0.002862
S2 spike	243	265	ALHRSYLTPGDSSSGWTAGAAAY			21	2339.11	S2_3A3Fab_complex	1.667	2348.81	0.258787	8.4653	0.263551	7.06043	0.007928
S2 spike	243	265	ALHRSYLTPGDSSSGWTAGAAAY			21	2339.11	S2_3A3Fab_complex	16.667	2348.48	0.197505	8.1362	0.203707	7.03116	0.041937
S2 spike	243	265	ALHRSYLTPGDSSSGWTAGAAAY			21	2339.11	S2_3A3Fab_complex	166.667	2348.7	0.274821	8.35904	0.279312	7.05875	0.012259
S2 spike	243	265	ALHRSYLTPGDSSSGWTAGAAAY			21	2339.11	S2_Alone	0	2340.4	0.021838	0	0	7.01782	0.039553
S2 spike	243	265	ALHRSYLTPGDSSSGWTAGAAAY			21	2339.11	S2_Alone	0.167	2348.52	0.161843	8.11959	0.16331	7.03036	0.03663
S2 spike	243	265	ALHRSYLTPGDSSSGWTAGAAAY			21	2339.11	S2_Alone	1.667	2348.77	0.23639	8.36813	0.237397	7.03822	0.046187
S2 spike	243	265	ALHRSYLTPGDSSSGWTAGAAAY			21	2339.11	S2_Alone	16.667	2348.58	0.185514	8.1781	0.186795	7.06248	0.008726
S2 spike	243	265	ALHRSYLTPGDSSSGWTAGAAAY			21	2339.11	S2_Alone	166.667	2348.78	0.267752	8.37742	0.268641	7.01529	0.045149
S2 spike	243	265	ALHRSYLTPGDSSSGWTAGAAAY			21	2339.11	S2_FL_complex	0	2340.4	0.021838	0	0	7.01782	0.039553
S2 spike	243	265	ALHRSYLTPGDSSSGWTAGAAAY			21	2339.11	S2_FL_complex	0.167	2348.32	0.209666	7.9115	0.2108	7.04394	0.036104
S2 spike	243	265	ALHRSYLTPGDSSSGWTAGAAAY			21	2339.11	S2_FL_complex	1.667	2348.69	0.333141	8.28614	0.333856	7.05473	0.014471
S2 spike	243	265	ALHRSYLTPGDSSSGWTAGAAAY			21	2339.11	S2_FL_complex	16.667	2348.52	0.175477	8.11659	0.17683	7.03883	0.039068
S2 spike	243	265	ALHRSYLTPGDSSSGWTAGAAAY			21	2339.11	S2_FL_complex	166.667	2348.82	0.23576	8.41557	0.23677	7.0238	0.025615
S2 spike	245	265	HRSYLTPGDSSSGWTAGAAAY			19	2154.98	S2_3A3Fab_complex	0	2156.21	0.047498	0	0	6.95945	0.033286
S2 spike	245	265	HRSYLTPGDSSSGWTAGAAAY			19	2154.98	S2_3A3Fab_complex	0.167	2163.8	0.043383	7.5895	0.064328	6.99523	0.001999
S2 spike	245	265	HRSYLTPGDSSSGWTAGAAAY			19	2154.98	S2_3A3Fab_complex	1.667	2164.27	0.110074	8.05991	0.119884	6.99421	0.007639
S2 spike	245	265	HRSYLTPGDSSSGWTAGAAAY			19	2154.98	S2_3A3Fab_complex	16.667	2164.02	0.088234	7.8109	0.100206	6.97413	0.031361
S2 spike	245	265	HRSYLTPGDSSSGWTAGAAAY			19	2154.98	S2_3A3Fab_complex	166.667	2164.12	0.173784	7.91604	0.180158	6.99847	0.012823
S2 spike	245	265	HRSYLTPGDSSSGWTAGAAAY			19	2154.98	S2_Alone	0	2156.21	0.047498	0	0	6.95945	0.033286
S2 spike	245	265	HRSYLTPGDSSSGWTAGAAAY			19	2154.98	S2_Alone	0.167	2163.95	0.090521	7.73979	0.102226	6.97177	0.028205
S2 spike	245	265	HRSYLTPGDSSSGWTAGAAAY			19	2154.98	S2_Alone	1.667	2164.15	0.150499	7.93699	0.157817	6.98	0.041033
S2 spike	245	265	HRSYLTPGDSSSGWTAGAAAY			19	2154.98	S2_Alone	16.667	2163.97	0.168221	7.75696	0.174798	6.99528	0.013751
S2 spike	245	265	HRSYLTPGDSSSGWTAGAAAY			19	2154.98	S2_Alone	166.667	2164.24	0.253491	8.03147	0.257903	6.95948	0.038625
S2 spike	245	265	HRSYLTPGDSSSGWTAGAAAY			19	2154.98	S2_FL_complex	0	2156.21	0.047498	0	0	6.95945	0.033286
S2 spike	245	265	HRSYLTPGDSSSGWTAGAAAY			19	2154.98	S2_FL_complex	0.167	2163.74	0.12456	7.53111	0.133308	6.98028	0.036522
S2 spike	245	265	HRSYLTPGDSSSGWTAGAAAY			19	2154.98	S2_FL_complex	1.667	2164.14	0.175118	7.93329	0.181445	6.99419	0.016537
S2 spike	245	265	HRSYLTPGDSSSGWTAGAAAY			19	2154.98	S2_FL_complex	16.667	2164.03	0.177289	7.81734	0.183541	6.97464	0.038062
S2 spike	245	265	HRSYLTPGDSSSGWTAGAAAY			19	2154.98	S2_FL_complex	166.667	2164.21	0.196227	8.00447	0.201894	6.96411	0.022728
S2 spike	267	276	VGYLQPRTFL			8	1193.67	S2_3A3Fab_complex	0	1194.34	0.024733	0	0	7.67452	0.023348
S2 spike	267	276	VGYLQPRTFL			8	1193.67	S2_3A3Fab_complex	0.167	1195.06	0.044863	0.719864	0.051229	7.69835	0.001714
S2 spike	267	276	VGYLQPRTFL			8	1193.67	S2_3A3Fab_complex	1.667	1195.59	0.072919	1.24971	0.076999	7.6924	0.010341
S2 spike	267	276	VGYLQPRTFL			8	1193.67	S2_3A3Fab_complex	16.667	1195.8	0.034654	1.46667	0.042575	7.67199	0.0192
S2 spike	267	276	VGYLQPRTFL			8	1193.67	S2_3A3Fab_complex	166.667	1195.87	0.118473	1.5375	0.121028	7.68826	0.008225
S2 spike	267	276	VGYLQPRTFL			8	1193.67	S2_Alone	0	1194.34	0.024733	0	0	7.67452	0.023348
S2 spike	267	276	VGYLQPRTFL			8	1193.67	S2_Alone	0.167	1195.11	0.113291	0.773903	0.11596	7.67921	0.02048
S2 spike	267	276	VGYLQPRTFL			8	1193.67	S2_Alone	1.667	1195.52	0.089476	1.1871	0.092832	7.68458	0.024401
S2 spike	267	276	VGYLQPRTFL			8	1193.67	S2_Alone	16.667	1195.87	0.042815	1.53559	0.049446	7.69628	0.007828
S2 spike	267	276	VGYLQPRTFL			8	1193.67	S2_Alone	166.667	1195.9	0.076043	1.56073	0.079964	7.67856	0.026776
S2 spike	267	276	VGYLQPRTFL			8	1193.67	S2_FL_complex	0	1194.34	0.024733	0	0	7.67452	0.023348
S2 spike	267	276	VGYLQPRTFL			8	1193.67	S2_FL_complex	0.167	1195.11	0.034672	0.77011	0.04259	7.68422	0.020625
S2 spike	267	276	VGYLQPRTFL			8	1193.67	S2_FL_complex	1.667	1195.49	0.04264	1.15684	0.049294	7.68932	0.011911
S2 spike	267	276	VGYLQPRTFL			8	1193.67	S2_FL_complex	16.667	1195.82	0.060052	1.47983	0.064946	7.68121	0.023146
S2 spike	267	276	VGYLQPRTFL			8	1193.67	S2_FL_complex	166.667	1195.94	0.065461	1.60441	0.069977	7.66812	0.011326
S2 spike	291	305	CALDPLSETKCTLKS			13	1608.8	S2_3A3Fab_complex	0	1609.75	0.034352	0	0	6.94112	0.036064
S2 spike	291	305	CALDPLSETKCTLKS			13	1608.8	S2_3A3Fab_complex	0.167	1610.82	0.051297	1.0683	0.061737	6.97408	0.003663
S2 spike	291	305	CALDPLSETKCTLKS			13	1608.8	S2_3A3Fab_complex	1.667	1611.24	0.074139	1.48799	0.081711	6.97263	0.00686
S2 spike	291	305	CALDPLSETKCTLKS			13	1608.8	S2_3A3Fab_complex	16.667	1611.64	0.091961	1.88711	0.098168	6.9354	0.037987
S2 spike	291	305	CALDPLSETKCTLKS			13	1608.8	S2_3A3Fab_complex	166.667	1613.38	0.136004	3.63487	0.140276	6.97022	0.011607
S2 spike	291	305	CALDPLSETKCTLKS			13	1608.8	S2_Alone	0	1609.75	0.034352	0	0	6.94112	0.036064
S2 spike	291	305	CALDPLSETKCTLKS			13	1608.8	S2_Alone	0.167	1610.91	0.158931	1.16062	0.162601	6.93652	0.03397
S2 spike	291	305	CALDPLSETKCTLKS			13	1608.8	S2_Alone	1.667	1611.12	0.114658	1.36911	0.119693	6.9449	0.04565
S2 spike	291	305	CALDPLSETKCTLKS			13	1608.8	S2_Alone	16.667	1611.57	0.13049	1.81741	0.134936	6.97377	0.009267
S2 spike	291	305	CALDPLSETKCTLKS			13	1608.8	S2_Alone	166.667	1613.47	0.305234	3.71768	0.307161	6.92382	0.040447
S2 spike	291	305	CALDPLSETKCTLKS			13	1608.8	S2_FL_complex	0	1609.75	0.034352	0	0	6.94112	0.036064
S2 spike	291	305	CALDPLSETKCTLKS			13	1608.8	S2_FL_complex	0.167	1610.9	0.135077	1.14813	0.139377	6.95211	0.035937
S2 spike	291	305	CALDPLSETKCTLKS			13	1608.8	S2_FL_complex	1.667	1611.14	0.231653	1.39508	0.234187	6.96664	0.015608
S2 spike	291	305	CALDPLSETKCTLKS			13	1608.8	S2_FL_complex	16.667	1611.51	0.177976	1.7616	0.181261	6.95332	0.039304
S2 spike	291	305	CALDPLSETKCTLKS			13	1608.8	S2_FL_complex	166.667	1613.45	0.083948	3.7022	0.090705	6.93303	0.022124
S2 spike	306	313	FTVEKGIY			7	956.509	S2_3A3Fab_complex	0	956.982	0.018087	0	0	7.00017	0.039655
S2 spike	306	313	FTVEKGIY			7	956.509	S2_3A3Fab_complex	0.167	959.186	0	2.20441	0.018087	7.0409	0
S2 spike	306	313	FTVEKGIY			7	956.509	S2_3A3Fab_complex	1.667	959.259	0.04676	2.27742	0.050136	7.04448	0.010153
S2 spike	306	313	FTVEKGIY			7	956.509	S2_3A3Fab_complex	16.667	959.571	0.016805	2.58948	0.024688	7.00672	0.035538
S2 spike	306	313	FTVEKGIY			7	956.509	S2_3A3Fab_complex	166.667	959.945	0.034995	2.96347	0.039392	7.04685	0.016101
S2 spike	306	313	FTVEKGIY			7	956.509	S2_Alone	0	956.982	0.018087	0	0	7.00017	0.039655
S2 spike	306	313	FTVEKGIY			7	956.509	S2_Alone	0.167	959.127	0.033449	2.14503	0.038026	7.01976	0.035467
S2 spike	306	313	FTVEKGIY			7	956.509	S2_Alone	1.667	959.223	0.068138	2.24092	0.070497	7.0278	0.045862
S2 spike	306	313	FTVEKGIY			7	956.509	S2_Alone	16.667	959.51	0.085877	2.52815	0.087761	7.04662	0.013468
S2 spike	306	313	FTVEKGIY			7	956.509	S2_Alone	166.667	960.021	0.037702	3.03934	0.041816	7.00387	0.044124
S2 spike	306	313	FTVEKGIY			7	956.509	S2_FL_complex	0	956.982	0.018087	0	0	7.00017	0.039655
S2 spike	306	313	FTVEKGIY			7	956.509	S2_FL_complex	0.167	959.17	0.054322	2.18794	0.057254	7.02173	0.040614
S2 spike	306	313	FTVEKGIY			7	956.509	S2_FL_complex	1.667	959.22	0.113845	2.23865	0.115273	7.04292	0.019011
S2 spike	306	313	FTVEKGIY			7	956.509	S2_FL_complex	16.667	959.57	0.082085	2.58845	0.084054	7.01088	0.044684
S2 spike	306	313	FTVEKGIY			7	956.509	S2_FL_complex	166.667	959.992	0.048337	3.01008	0.05161	6.99239	0.020636
S2 spike	306	317	FTVEKGIYQTSN			11	1386.69	S2_3A3Fab_complex	0	1387.42	0.091012	0	0	6.73862	0.0402
S2 spike	306	317	FTVEKGIYQTSN			11	1386.69	S2_3A3Fab_complex	0.167	1391.26	0	3.84305	0.091012	6.78903	0
S2 spike	306	317	FTVEKGIYQTSN			11	1386.69	S2_3A3Fab_complex	1.667	1391.58	0.00288	4.16371	0.091058	6.77827	0.004778
S2 spike	306	317	FTVEKGIYQTSN			11	1386.69	S2_3A3Fab_complex	16.667	1392.11	0.099879	4.68907	0.135126	6.75152	0.037887
S2 spike	306	317	FTVEKGIYQTSN			11	1386.69	S2_3A3Fab_complex	166.667	1392.39	0.212601	4.96973	0.231262	6.77832	0.015862
S2 spike	306	317	FTVEKGIYQTSN			11	1386.69	S2_Alone	0	1387.44	0.039051	0	0	6.7381	0.040049
S2 spike	306	317	FTVEKGIYQTSN			11	1386.69	S2_Alone	0.167	1391.32	0	3.88107	0.039051	6.70202	0
S2 spike	306	317	FTVEKGIYQTSN			11	1386.69	S2_Alone	1.667	1391.52	0.05283	4.07415	0.065696	6.80624	0.00299
S2 spike	306	317	FTVEKGIYQTSN			11	1386.69	S2_Alone	16.667	1392.24	0.039056	4.7935	0.05523	6.77764	0.004864
S2 spike	306	317	FTVEKGIYQTSN			11	1386.69	S2_Alone	166.667	1392.67	0.000925	5.23251	0.039062	6.74799	0.050069
S2 spike	306	317	FTVEKGIYQTSN			11	1386.69	S2_FL_complex	0	1387.44	0.039051	0	0	6.7381	0.040049
S2 spike	306	317	FTVEKGIYQTSN			11	1386.69	S2_FL_complex	0.167	1391.19	0.029045	3.74689	0.048668	6.7614	0.042469
S2 spike	306	317	FTVEKGIYQTSN			11	1386.69	S2_FL_complex	1.667	1391.44	0.076664	3.99549	0.086037	6.78358	0.016842
S2 spike	306	317	FTVEKGIYQTSN			11	1386.69	S2_FL_complex	16.667	1392.04	0.002913	4.60226	0.039159	6.72726	0.041263
S2 spike	306	317	FTVEKGIYQTSN			11	1386.69	S2_FL_complex	166.667	1392.79	0.087265	5.34743	0.095604	6.74386	0.036791
S2 spike	307	318	TVEKGIYQTSNF			11	1386.69	S2_3A3Fab_complex	0	1387.33	0.014209	0	0	6.93687	0.032251
S2 spike	307	318	TVEKGIYQTSNF			11	1386.69	S2_3A3Fab_complex	0.167	1390.63	0.031541	3.29897	0.034593	6.98836	0.001702
S2 spike	307	318	TVEKGIYQTSNF			11	1386.69	S2_3A3Fab_complex	1.667	1391.34	0.050145	4.00975	0.052119	6.98618	0.00993
S2 spike	307	318	TVEKGIYQTSNF			11	1386.69	S2_3A3Fab_complex	16.667	1392.08	0.092421	4.7568	0.093507	6.95639	0.036508
S2 spike	307	318	TVEKGIYQTSNF			11	1386.69	S2_3A3Fab_complex	166.667	1392.59	0.163383	5.26637	0.163999	6.98512	0.012545
S2 spike	307	318	TVEKGIYQTSNF			11	1386.69	S2_Alone	0	1387.33	0.014209	0	0	6.93687	0.032251
S2 spike	307	318	TVEKGIYQTSNF			11	1386.69	S2_Alone	0.167	1390.59	0.075674	3.25955	0.076997	6.95396	0.03225
S2 spike	307	318	TVEKGIYQTSNF			11	1386.69	S2_Alone	1.667	1391.41	0.067156	4.07932	0.068643	6.96404	0.041792
S2 spike	307	318	TVEKGIYQTSNF			11	1386.69	S2_Alone	16.667	1392.1	0.115345	4.76839	0.116217	6.98368	0.010137
S2 spike	307	318	TVEKGIYQTSNF			11	1386.69	S2_Alone	166.667	1392.68	0.141642	5.34839	0.142352	6.93879	0.037464
S2 spike	307	318	TVEKGIYQTSNF			11	1386.69	S2_FL_complex	0	1387.33	0.014209	0	0	6.93687	0.032251
S2 spike	307	318	TVEKGIYQTSNF			11	1386.69	S2_FL_complex	0.167	1390.66	0.086592	3.33568	0.08775	6.97103	0.038802
S2 spike	307	318	TVEKGIYQTSNF			11	1386.69	S2_FL_complex	1.667	1391.43	0.049916	4.10445	0.051899	6.97586	0.008162
S2 spike	307	318	TVEKGIYQTSNF			11	1386.69	S2_FL_complex	16.667	1392.1	0.045834	4.77121	0.047986	6.96318	0.042317
S2 spike	307	318	TVEKGIYQTSNF			11	1386.69	S2_FL_complex	166.667	1392.77	0.079987	5.4471	0.081239	6.95344	0.023831
S2 spike	310	318	KGIYQTSNF			8	1057.53	S2_3A3Fab_complex	0	1058.08	0.024001	0	0	6.84222	0.039206
S2 spike	310	318	KGIYQTSNF			8	1057.53	S2_3A3Fab_complex	0.167	1059.87	0.023163	1.78265	0.033355	6.89132	0.003403
S2 spike	310	318	KGIYQTSNF			8	1057.53	S2_3A3Fab_complex	1.667	1060.49	0.026875	2.40576	0.036032	6.89091	0.006796
S2 spike	310	318	KGIYQTSNF			8	1057.53	S2_3A3Fab_complex	16.667	1061.19	0.04572	3.10596	0.051637	6.85572	0.040997
S2 spike	310	318	KGIYQTSNF			8	1057.53	S2_3A3Fab_complex	166.667	1061.68	0.037053	3.5987	0.044147	6.89769	0.008727
S2 spike	310	318	KGIYQTSNF			8	1057.53	S2_Alone	0	1058.08	0.024001	0	0	6.84222	0.039206
S2 spike	310	318	KGIYQTSNF			8	1057.53	S2_Alone	0.167	1059.84	0.044831	1.76094	0.050851	6.8585	0.036446
S2 spike	310	318	KGIYQTSNF			8	1057.53	S2_Alone	1.667	1060.54	0.038132	2.4553	0.045056	6.838	0.040837
S2 spike	310	318	KGIYQTSNF			8	1057.53	S2_Alone	16.667	1061.22	0.051231	3.13439	0.056574	6.89112	0.011832
S2 spike	310	318	KGIYQTSNF			8	1057.53	S2_Alone	166.667	1061.77	0.052573	3.68969	0.057793	6.83876	0.043248
S2 spike	310	318	KGIYQTSNF			8	1057.53	S2_FL_complex	0	1058.08	0.024001	0	0	6.84222	0.039206
S2 spike	310	318	KGIYQTSNF			8	1057.53	S2_FL_complex	0.167	1059.83	0.0797	1.74412	0.083235	6.86951	0.040394
S2 spike	310	318	KGIYQTSNF			8	1057.53	S2_FL_complex	1.667	1060.47	0.052885	2.38617	0.058076	6.88638	0.014706
S2 spike	310	318	KGIYQTSNF			8	1057.53	S2_FL_complex	16.667	1061.16	0.093492	3.07925	0.096523	6.86136	0.045711
S2 spike	310	318	KGIYQTSNF			8	1057.53	S2_FL_complex	166.667	1061.7	0.044696	3.61489	0.050732	6.85341	0.030395
S2 spike	319	325	RVQPTES			5	816.421	S2_3A3Fab_complex	0	817.061	0.049737	0	0	5.14238	0.059618
S2 spike	319	325	RVQPTES			5	816.421	S2_3A3Fab_complex	0.167	819.05	0.03017	1.98857	0.058172	5.19	0.00378
S2 spike	319	325	RVQPTES			5	816.421	S2_3A3Fab_complex	1.667	819.165	0.033101	2.10352	0.059745	5.19505	0.011261
S2 spike	319	325	RVQPTES			5	816.421	S2_3A3Fab_complex	16.667	819.153	0.063337	2.0923	0.080532	5.14527	0.074127
S2 spike	319	325	RVQPTES			5	816.421	S2_3A3Fab_complex	166.667	819.174	0.02302	2.11244	0.054806	5.20143	0.018852
S2 spike	319	325	RVQPTES			5	816.421	S2_Alone	0	817.061	0.049737	0	0	5.14238	0.059618
S2 spike	319	325	RVQPTES			5	816.421	S2_Alone	0.167	819.025	0.049619	1.9636	0.070255	5.13552	0.057445
S2 spike	319	325	RVQPTES			5	816.421	S2_Alone	1.667	819.148	0.049279	2.08657	0.070016	5.15848	0.087727
S2 spike	319	325	RVQPTES			5	816.421	S2_Alone	16.667	819.157	0.036854	2.0957	0.061903	5.19273	0.01932
S2 spike	319	325	RVQPTES			5	816.421	S2_Alone	166.667	819.167	0.058372	2.10568	0.076688	5.08145	0.061868
S2 spike	319	325	RVQPTES			5	816.421	S2_FL_complex	0	817.061	0.049737	0	0	5.14238	0.059618
S2 spike	319	325	RVQPTES			5	816.421	S2_FL_complex	0.167	819.074	0.025093	2.013	0.055708	5.16947	0.071612
S2 spike	319	325	RVQPTES			5	816.421	S2_FL_complex	1.667	819.134	0.042973	2.07251	0.06573	5.1932	0.027866
S2 spike	319	325	RVQPTES			5	816.421	S2_FL_complex	16.667	819.129	0.028871	2.06806	0.057509	5.20475	0.029426
S2 spike	319	325	RVQPTES			5	816.421	S2_FL_complex	166.667	819.174	0.044048	2.11307	0.066438	5.13667	0.056173
S2 spike	348	361	ASVYAWNRKRISNC			13	1667.84	S2_3A3Fab_complex	0	1670.71	0.012108	0	0	6.47739	0.046604
S2 spike	348	361	ASVYAWNRKRISNC			13	1667.84	S2_3A3Fab_complex	0.167	1670.92	2.27374e-13	0.213019	0.012108	6.54735	0
S2 spike	348	361	ASVYAWNRKRISNC			13	1667.84	S2_3A3Fab_complex	1.667	1670.98	0.00757	0.264716	0.014279	6.54586	0.008811
S2 spike	348	361	ASVYAWNRKRISNC			13	1667.84	S2_3A3Fab_complex	16.667	1670.97	2.27374e-13	0.258799	0.012108	6.56913	0
S2 spike	348	361	ASVYAWNRKRISNC			13	1667.84	S2_3A3Fab_complex	166.667	1671.28	0.019118	0.568728	0.02263	6.5396	0.002672
S2 spike	348	361	ASVYAWNRKRISNC			13	1667.84	S2_Alone	0	1670.69	0.120783	0	0	6.4908	0.048794
S2 spike	348	361	ASVYAWNRKRISNC			13	1667.84	S2_Alone	0.167	1671.03	0.045709	0.339889	0.129142	6.48327	0.035711
S2 spike	348	361	ASVYAWNRKRISNC			13	1667.84	S2_Alone	1.667	1670.94	0	0.252587	0.120783	6.55753	0
S2 spike	348	361	ASVYAWNRKRISNC			13	1667.84	S2_Alone	16.667	1671.02	0	0.335166	0.120783	6.55678	0
S2 spike	348	361	ASVYAWNRKRISNC			13	1667.84	S2_Alone	166.667	1671.3	0	0.608819	0.120783	6.55669	0
S2 spike	348	361	ASVYAWNRKRISNC			13	1667.84	S2_FL_complex	0	1670.65	0.105884	0	0	6.48126	0.043146
S2 spike	348	361	ASVYAWNRKRISNC			13	1667.84	S2_FL_complex	0.167	1670.94	0.037525	0.286465	0.112336	6.52604	0.050238
S2 spike	348	361	ASVYAWNRKRISNC			13	1667.84	S2_FL_complex	1.667	1670.99	0.053601	0.341484	0.118678	6.54556	0.018503
S2 spike	348	361	ASVYAWNRKRISNC			13	1667.84	S2_FL_complex	16.667	1671.02	0.020105	0.375158	0.107775	6.52081	0.054296
S2 spike	348	361	ASVYAWNRKRISNC			13	1667.84	S2_FL_complex	166.667	1671.2	0.081157	0.553008	0.133408	6.50347	0.039172
S2 spike	351	361	YAWNRKRISNC			10	1410.71	S2_3A3Fab_complex	0	1411.56	0.02992	0	0	6.20224	0.047497
S2 spike	351	361	YAWNRKRISNC			10	1410.71	S2_3A3Fab_complex	0.167	1413.11	0.099337	1.54548	0.103745	6.26595	0.002956
S2 spike	351	361	YAWNRKRISNC			10	1410.71	S2_3A3Fab_complex	1.667	1413.22	0.035949	1.65695	0.046771	6.26955	0.007321
S2 spike	351	361	YAWNRKRISNC			10	1410.71	S2_3A3Fab_complex	16.667	1413.41	0.067252	1.85106	0.073608	6.21897	0.055179
S2 spike	351	361	YAWNRKRISNC			10	1410.71	S2_3A3Fab_complex	166.667	1414.03	0.0938	2.47165	0.098456	6.26739	0.013103
S2 spike	351	361	YAWNRKRISNC			10	1410.71	S2_Alone	0	1411.56	0.02992	0	0	6.20224	0.047497
S2 spike	351	361	YAWNRKRISNC			10	1410.71	S2_Alone	0.167	1413.2	0.090759	1.63874	0.095563	6.21933	0.046513
S2 spike	351	361	YAWNRKRISNC			10	1410.71	S2_Alone	1.667	1413.34	0.118326	1.78297	0.12205	6.22091	0.063678
S2 spike	351	361	YAWNRKRISNC			10	1410.71	S2_Alone	16.667	1413.43	0.088762	1.87388	0.093669	6.26874	0.014041
S2 spike	351	361	YAWNRKRISNC			10	1410.71	S2_Alone	166.667	1414.16	0.088217	2.59878	0.093152	6.17941	0.036825
S2 spike	351	361	YAWNRKRISNC			10	1410.71	S2_FL_complex	0	1411.56	0.02992	0	0	6.20224	0.047497
S2 spike	351	361	YAWNRKRISNC			10	1410.71	S2_FL_complex	0.167	1413.13	0.084759	1.57308	0.089885	6.24071	0.050668
S2 spike	351	361	YAWNRKRISNC			10	1410.71	S2_FL_complex	1.667	1413.27	0.07819	1.70893	0.083719	6.25966	0.009093
S2 spike	351	361	YAWNRKRISNC			10	1410.71	S2_FL_complex	16.667	1413.42	0.063244	1.85596	0.069965	6.22455	0.060308
S2 spike	351	361	YAWNRKRISNC			10	1410.71	S2_FL_complex	166.667	1414.03	0.103968	2.47418	0.108187	6.2171	0.04176
S2 spike	400	420	FVIRGDEVRQIAPGQTGKIAD			19	2270.23	S2_3A3Fab_complex	0	2271.76	0.050091	0	0	6.57183	0.03952
S2 spike	400	420	FVIRGDEVRQIAPGQTGKIAD			19	2270.23	S2_3A3Fab_complex	0.167	2273.82	0.033925	2.05304	0.060498	6.62065	0.003916
S2 spike	400	420	FVIRGDEVRQIAPGQTGKIAD			19	2270.23	S2_3A3Fab_complex	1.667	2274.79	0.17681	3.02815	0.183768	6.6245	0.008622
S2 spike	400	420	FVIRGDEVRQIAPGQTGKIAD			19	2270.23	S2_3A3Fab_complex	16.667	2275.34	0.175151	3.57904	0.182173	6.58336	0.045434
S2 spike	400	420	FVIRGDEVRQIAPGQTGKIAD			19	2270.23	S2_3A3Fab_complex	166.667	2276.54	0.13773	4.77307	0.146556	6.6231	0.010074
S2 spike	400	420	FVIRGDEVRQIAPGQTGKIAD			19	2270.23	S2_Alone	0	2271.76	0.050091	0	0	6.57183	0.03952
S2 spike	400	420	FVIRGDEVRQIAPGQTGKIAD			19	2270.23	S2_Alone	0.167	2274.05	0.177578	2.28393	0.184507	6.58216	0.039895
S2 spike	400	420	FVIRGDEVRQIAPGQTGKIAD			19	2270.23	S2_Alone	1.667	2274.76	0.216096	2.9939	0.221825	6.59113	0.056563
S2 spike	400	420	FVIRGDEVRQIAPGQTGKIAD			19	2270.23	S2_Alone	16.667	2275.25	0.139529	3.49203	0.148248	6.62233	0.011482
S2 spike	400	420	FVIRGDEVRQIAPGQTGKIAD			19	2270.23	S2_Alone	166.667	2276.71	0.250774	4.95044	0.255728	6.56186	0.047311
S2 spike	400	420	FVIRGDEVRQIAPGQTGKIAD			19	2270.23	S2_FL_complex	0	2271.76	0.050091	0	0	6.57183	0.03952
S2 spike	400	420	FVIRGDEVRQIAPGQTGKIAD			19	2270.23	S2_FL_complex	0.167	2273.86	0.039834	2.09818	0.063998	6.60079	0.044162
S2 spike	400	420	FVIRGDEVRQIAPGQTGKIAD			19	2270.23	S2_FL_complex	1.667	2274.71	0.131197	2.9453	0.140434	6.61754	0.014162
S2 spike	400	420	FVIRGDEVRQIAPGQTGKIAD			19	2270.23	S2_FL_complex	16.667	2275.31	0.156632	3.54932	0.164446	6.59153	0.052675
S2 spike	400	420	FVIRGDEVRQIAPGQTGKIAD			19	2270.23	S2_FL_complex	166.667	2276.52	0.21602	4.76119	0.221752	6.58046	0.03182
S2 spike	400	421	FVIRGDEVRQIAPGQTGKIADY			20	2433.29	S2_3A3Fab_complex	0	2434.8	0.039985	0	0	6.84065	0.036447
S2 spike	400	421	FVIRGDEVRQIAPGQTGKIADY			20	2433.29	S2_3A3Fab_complex	0.167	2437.37	0.035136	2.56694	0.053229	6.884	0.003074
S2 spike	400	421	FVIRGDEVRQIAPGQTGKIADY			20	2433.29	S2_3A3Fab_complex	1.667	2438.03	0.133741	3.22588	0.13959	6.88347	0.009629
S2 spike	400	421	FVIRGDEVRQIAPGQTGKIADY			20	2433.29	S2_3A3Fab_complex	16.667	2438.82	0.122218	4.01641	0.128592	6.84574	0.040021
S2 spike	400	421	FVIRGDEVRQIAPGQTGKIADY			20	2433.29	S2_3A3Fab_complex	166.667	2440	0.121435	5.198	0.127849	6.88307	0.012538
S2 spike	400	421	FVIRGDEVRQIAPGQTGKIADY			20	2433.29	S2_Alone	0	2434.8	0.039985	0	0	6.84065	0.036447
S2 spike	400	421	FVIRGDEVRQIAPGQTGKIADY			20	2433.29	S2_Alone	0.167	2437.55	0.120796	2.74819	0.127242	6.84858	0.036604
S2 spike	400	421	FVIRGDEVRQIAPGQTGKIADY			20	2433.29	S2_Alone	1.667	2438.02	0.163575	3.21583	0.168391	6.85729	0.048135
S2 spike	400	421	FVIRGDEVRQIAPGQTGKIADY			20	2433.29	S2_Alone	16.667	2438.88	0.119272	4.07352	0.125796	6.88279	0.012369
S2 spike	400	421	FVIRGDEVRQIAPGQTGKIADY			20	2433.29	S2_Alone	166.667	2440.09	0.187364	5.28248	0.191583	6.83203	0.043902
S2 spike	400	421	FVIRGDEVRQIAPGQTGKIADY			20	2433.29	S2_FL_complex	0	2434.8	0.039985	0	0	6.84065	0.036447
S2 spike	400	421	FVIRGDEVRQIAPGQTGKIADY			20	2433.29	S2_FL_complex	0.167	2437.47	0.044033	2.6691	0.059478	6.86271	0.041385
S2 spike	400	421	FVIRGDEVRQIAPGQTGKIADY			20	2433.29	S2_FL_complex	1.667	2437.96	0.090649	3.15525	0.099076	6.87897	0.013335
S2 spike	400	421	FVIRGDEVRQIAPGQTGKIADY			20	2433.29	S2_FL_complex	16.667	2438.86	0.066035	4.05514	0.077197	6.85655	0.044054
S2 spike	400	421	FVIRGDEVRQIAPGQTGKIADY			20	2433.29	S2_FL_complex	166.667	2440.09	0.096108	5.28341	0.104094	6.84537	0.026978
S2 spike	400	422	FVIRGDEVRQIAPGQTGKIADYN			21	2547.33	S2_3A3Fab_complex	0	2548.99	0.048271	0	0	6.7266	0.040584
S2 spike	400	422	FVIRGDEVRQIAPGQTGKIADYN			21	2547.33	S2_3A3Fab_complex	0.167	2551.54	0.032139	2.54183	0.057992	6.77831	0.002098
S2 spike	400	422	FVIRGDEVRQIAPGQTGKIADYN			21	2547.33	S2_3A3Fab_complex	1.667	2552.23	0.121537	3.23707	0.130773	6.77643	0.008232
S2 spike	400	422	FVIRGDEVRQIAPGQTGKIADYN			21	2547.33	S2_3A3Fab_complex	16.667	2553.03	0.141709	4.03337	0.149705	6.74004	0.043337
S2 spike	400	422	FVIRGDEVRQIAPGQTGKIADYN			21	2547.33	S2_3A3Fab_complex	166.667	2554.19	0.164862	5.19895	0.171783	6.77863	0.012933
S2 spike	400	422	FVIRGDEVRQIAPGQTGKIADYN			21	2547.33	S2_Alone	0	2548.99	0.048271	0	0	6.7266	0.040584
S2 spike	400	422	FVIRGDEVRQIAPGQTGKIADYN			21	2547.33	S2_Alone	0.167	2551.72	0.165601	2.73018	0.172493	6.74396	0.037437
S2 spike	400	422	FVIRGDEVRQIAPGQTGKIADYN			21	2547.33	S2_Alone	1.667	2552.23	0.19107	3.23205	0.197074	6.7542	0.05011
S2 spike	400	422	FVIRGDEVRQIAPGQTGKIADYN			21	2547.33	S2_Alone	16.667	2553.09	0.117158	4.09471	0.126712	6.77752	0.012343
S2 spike	400	422	FVIRGDEVRQIAPGQTGKIADYN			21	2547.33	S2_Alone	166.667	2554.26	0.163507	5.26213	0.170483	6.72653	0.044087
S2 spike	400	422	FVIRGDEVRQIAPGQTGKIADYN			21	2547.33	S2_FL_complex	0	2548.99	0.048271	0	0	6.7266	0.040584
S2 spike	400	422	FVIRGDEVRQIAPGQTGKIADYN			21	2547.33	S2_FL_complex	0.167	2551.63	0.033398	2.63779	0.058699	6.75879	0.04306
S2 spike	400	422	FVIRGDEVRQIAPGQTGKIADYN			21	2547.33	S2_FL_complex	1.667	2552.11	0.070908	3.11576	0.085779	6.77256	0.014774
S2 spike	400	422	FVIRGDEVRQIAPGQTGKIADYN			21	2547.33	S2_FL_complex	16.667	2553	0.058822	4.00941	0.076093	6.74747	0.048667
S2 spike	400	422	FVIRGDEVRQIAPGQTGKIADYN			21	2547.33	S2_FL_complex	166.667	2554.25	0.081699	5.25592	0.094894	6.73719	0.029461
S2 spike	401	420	VIRGDEVRQIAPGQTGKIAD			18	2123.16	S2_3A3Fab_complex	0	2124.53	0.068857	0	0	6.17543	0.047075
S2 spike	401	420	VIRGDEVRQIAPGQTGKIAD			18	2123.16	S2_3A3Fab_complex	0.167	2127.19	0.051661	2.65634	0.086082	6.23986	0.003929
S2 spike	401	420	VIRGDEVRQIAPGQTGKIAD			18	2123.16	S2_3A3Fab_complex	1.667	2127.83	0.059124	3.29552	0.090757	6.24096	0.01003
S2 spike	401	420	VIRGDEVRQIAPGQTGKIAD			18	2123.16	S2_3A3Fab_complex	16.667	2128.72	0.177762	4.1879	0.190632	6.20076	0.052413
S2 spike	401	420	VIRGDEVRQIAPGQTGKIAD			18	2123.16	S2_3A3Fab_complex	166.667	2129.75	0.117574	5.21298	0.136253	6.24003	0.014525
S2 spike	401	420	VIRGDEVRQIAPGQTGKIAD			18	2123.16	S2_Alone	0	2124.53	0.068857	0	0	6.17543	0.047075
S2 spike	401	420	VIRGDEVRQIAPGQTGKIAD			18	2123.16	S2_Alone	0.167	2127.3	0.071705	2.76412	0.099413	6.19993	0.042999
S2 spike	401	420	VIRGDEVRQIAPGQTGKIAD			18	2123.16	S2_Alone	1.667	2127.79	0.152185	3.25328	0.167038	6.21019	0.063965
S2 spike	401	420	VIRGDEVRQIAPGQTGKIAD			18	2123.16	S2_Alone	16.667	2128.72	0.118316	4.18781	0.136894	6.23527	0.01396
S2 spike	401	420	VIRGDEVRQIAPGQTGKIAD			18	2123.16	S2_Alone	166.667	2129.96	0.202886	5.4256	0.214252	6.17411	0.053316
S2 spike	401	420	VIRGDEVRQIAPGQTGKIAD			18	2123.16	S2_FL_complex	0	2124.53	0.068857	0	0	6.17543	0.047075
S2 spike	401	420	VIRGDEVRQIAPGQTGKIAD			18	2123.16	S2_FL_complex	0.167	2127.19	0.02935	2.65564	0.074851	6.21902	0.053715
S2 spike	401	420	VIRGDEVRQIAPGQTGKIAD			18	2123.16	S2_FL_complex	1.667	2127.7	0.189418	3.16833	0.201545	6.23927	0.018018
S2 spike	401	420	VIRGDEVRQIAPGQTGKIAD			18	2123.16	S2_FL_complex	16.667	2128.63	0.070954	4.0999	0.098872	6.20955	0.058685
S2 spike	401	420	VIRGDEVRQIAPGQTGKIAD			18	2123.16	S2_FL_complex	166.667	2129.82	0.163878	5.28588	0.177756	6.1951	0.03857
S2 spike	401	421	VIRGDEVRQIAPGQTGKIADY			19	2286.22	S2_3A3Fab_complex	0	2287.68	0.044338	0	0	6.48825	0.044399
S2 spike	401	421	VIRGDEVRQIAPGQTGKIADY			19	2286.22	S2_3A3Fab_complex	0.167	2290.32	0.026989	2.63916	0.051906	6.54887	0.002227
S2 spike	401	421	VIRGDEVRQIAPGQTGKIADY			19	2286.22	S2_3A3Fab_complex	1.667	2291.03	0.034628	3.34743	0.056258	6.55146	0.010021
S2 spike	401	421	VIRGDEVRQIAPGQTGKIADY			19	2286.22	S2_3A3Fab_complex	16.667	2291.85	0.104393	4.17103	0.113418	6.50731	0.051323
S2 spike	401	421	VIRGDEVRQIAPGQTGKIADY			19	2286.22	S2_3A3Fab_complex	166.667	2292.95	0.119776	5.26968	0.127719	6.54916	0.015839
S2 spike	401	421	VIRGDEVRQIAPGQTGKIADY			19	2286.22	S2_Alone	0	2287.68	0.044338	0	0	6.48825	0.044399
S2 spike	401	421	VIRGDEVRQIAPGQTGKIADY			19	2286.22	S2_Alone	0.167	2290.43	0.079855	2.74517	0.091338	6.505	0.041416
S2 spike	401	421	VIRGDEVRQIAPGQTGKIADY			19	2286.22	S2_Alone	1.667	2290.95	0.140847	3.2724	0.147661	6.51861	0.057403
S2 spike	401	421	VIRGDEVRQIAPGQTGKIADY			19	2286.22	S2_Alone	16.667	2291.84	0.143723	4.16298	0.150407	6.54425	0.016091
S2 spike	401	421	VIRGDEVRQIAPGQTGKIADY			19	2286.22	S2_Alone	166.667	2293.09	0.199123	5.41283	0.203999	6.48433	0.050598
S2 spike	401	421	VIRGDEVRQIAPGQTGKIADY			19	2286.22	S2_FL_complex	0	2287.68	0.044338	0	0	6.48825	0.044399
S2 spike	401	421	VIRGDEVRQIAPGQTGKIADY			19	2286.22	S2_FL_complex	0.167	2290.36	0.030339	2.67789	0.053725	6.52889	0.049365
S2 spike	401	421	VIRGDEVRQIAPGQTGKIADY			19	2286.22	S2_FL_complex	1.667	2290.88	0.096703	3.19555	0.106383	6.54309	0.018212
S2 spike	401	421	VIRGDEVRQIAPGQTGKIADY			19	2286.22	S2_FL_complex	16.667	2291.77	0.103844	4.09147	0.112913	6.5179	0.053499
S2 spike	401	421	VIRGDEVRQIAPGQTGKIADY			19	2286.22	S2_FL_complex	166.667	2292.97	0.176953	5.28911	0.182423	6.50562	0.037758
S2 spike	401	422	VIRGDEVRQIAPGQTGKIADYN			20	2400.26	S2_3A3Fab_complex	0	2401.89	0.083602	0	0	6.37415	0.043851
S2 spike	401	422	VIRGDEVRQIAPGQTGKIADYN			20	2400.26	S2_3A3Fab_complex	0.167	2404.52	0.032408	2.62992	0.089663	6.43619	0.002838
S2 spike	401	422	VIRGDEVRQIAPGQTGKIADYN			20	2400.26	S2_3A3Fab_complex	1.667	2405.21	0.047071	3.32835	0.095942	6.43355	0.008276
S2 spike	401	422	VIRGDEVRQIAPGQTGKIADYN			20	2400.26	S2_3A3Fab_complex	16.667	2406.05	0.153203	4.16089	0.174529	6.39403	0.050057
S2 spike	401	422	VIRGDEVRQIAPGQTGKIADYN			20	2400.26	S2_3A3Fab_complex	166.667	2407.14	0.16577	5.252	0.185658	6.43252	0.014141
S2 spike	401	422	VIRGDEVRQIAPGQTGKIADYN			20	2400.26	S2_Alone	0	2401.89	0.083602	0	0	6.37415	0.043851
S2 spike	401	422	VIRGDEVRQIAPGQTGKIADYN			20	2400.26	S2_Alone	0.167	2404.62	0.085883	2.73336	0.119855	6.39117	0.042861
S2 spike	401	422	VIRGDEVRQIAPGQTGKIADYN			20	2400.26	S2_Alone	1.667	2405.13	0.17823	3.24079	0.196863	6.40122	0.060393
S2 spike	401	422	VIRGDEVRQIAPGQTGKIADYN			20	2400.26	S2_Alone	16.667	2406.08	0.132773	4.19043	0.156901	6.42825	0.013897
S2 spike	401	422	VIRGDEVRQIAPGQTGKIADYN			20	2400.26	S2_Alone	166.667	2407.26	0.217668	5.36978	0.233171	6.37038	0.053011
S2 spike	401	422	VIRGDEVRQIAPGQTGKIADYN			20	2400.26	S2_FL_complex	0	2401.89	0.083602	0	0	6.37415	0.043851
S2 spike	401	422	VIRGDEVRQIAPGQTGKIADYN			20	2400.26	S2_FL_complex	0.167	2404.56	0.019292	2.66957	0.085799	6.40646	0.050838
S2 spike	401	422	VIRGDEVRQIAPGQTGKIADYN			20	2400.26	S2_FL_complex	1.667	2404.98	0.132485	3.09023	0.156657	6.42901	0.019238
S2 spike	401	422	VIRGDEVRQIAPGQTGKIADYN			20	2400.26	S2_FL_complex	16.667	2405.96	0.136725	4.07573	0.160259	6.40183	0.054997
S2 spike	401	422	VIRGDEVRQIAPGQTGKIADYN			20	2400.26	S2_FL_complex	166.667	2407.11	0.181779	5.22161	0.200082	6.39141	0.035913
S2 spike	407	420	VRQIAPGQTGKIAD			12	1453.81	S2_3A3Fab_complex	0	1454.8	0.061383	0	0	5.84376	0.055662
S2 spike	407	420	VRQIAPGQTGKIAD			12	1453.81	S2_3A3Fab_complex	0.167	1456.45	0.048852	1.65443	0.07845	5.91775	0.003386
S2 spike	407	420	VRQIAPGQTGKIAD			12	1453.81	S2_3A3Fab_complex	1.667	1456.97	0.051136	2.16961	0.079892	5.91736	0.006881
S2 spike	407	420	VRQIAPGQTGKIAD			12	1453.81	S2_3A3Fab_complex	16.667	1457.75	0.113799	2.95162	0.129299	5.87051	0.059328
S2 spike	407	420	VRQIAPGQTGKIAD			12	1453.81	S2_3A3Fab_complex	166.667	1458.21	0.046817	3.41367	0.077199	5.92051	0.017508
S2 spike	407	420	VRQIAPGQTGKIAD			12	1453.81	S2_Alone	0	1454.8	0.061383	0	0	5.84376	0.055662
S2 spike	407	420	VRQIAPGQTGKIAD			12	1453.81	S2_Alone	0.167	1456.52	0.046708	1.71877	0.077133	5.87326	0.049597
S2 spike	407	420	VRQIAPGQTGKIAD			12	1453.81	S2_Alone	1.667	1457.01	0.135975	2.20749	0.149188	5.88737	0.07081
S2 spike	407	420	VRQIAPGQTGKIAD			12	1453.81	S2_Alone	16.667	1457.78	0.064688	2.97775	0.089176	5.91391	0.014916
S2 spike	407	420	VRQIAPGQTGKIAD			12	1453.81	S2_Alone	166.667	1458.34	0.089979	3.54395	0.108922	5.84905	0.064849
S2 spike	407	420	VRQIAPGQTGKIAD			12	1453.81	S2_FL_complex	0	1454.8	0.061383	0	0	5.84376	0.055662
S2 spike	407	420	VRQIAPGQTGKIAD			12	1453.81	S2_FL_complex	0.167	1456.43	0.083986	1.6345	0.104026	5.89392	0.059262
S2 spike	407	420	VRQIAPGQTGKIAD			12	1453.81	S2_FL_complex	1.667	1456.91	0.075364	2.1071	0.097199	5.91792	0.020071
S2 spike	407	420	VRQIAPGQTGKIAD			12	1453.81	S2_FL_complex	16.667	1457.69	0.046141	2.88886	0.076791	5.87726	0.06736
S2 spike	407	420	VRQIAPGQTGKIAD			12	1453.81	S2_FL_complex	166.667	1458.26	0.128292	3.46688	0.14222	5.8708	0.045996
S2 spike	407	421	VRQIAPGQTGKIADY			13	1616.88	S2_3A3Fab_complex	0	1617.89	0.047322	0	0	6.34653	0.046598
S2 spike	407	421	VRQIAPGQTGKIADY			13	1616.88	S2_3A3Fab_complex	0.167	1619.59	0.046696	1.69658	0.066482	6.40607	0.00121
S2 spike	407	421	VRQIAPGQTGKIADY			13	1616.88	S2_3A3Fab_complex	1.667	1620.14	0.073645	2.24473	0.087538	6.40839	0.007886
S2 spike	407	421	VRQIAPGQTGKIADY			13	1616.88	S2_3A3Fab_complex	16.667	1620.96	0.075279	3.06389	0.088917	6.37177	0.051638
S2 spike	407	421	VRQIAPGQTGKIADY			13	1616.88	S2_3A3Fab_complex	166.667	1621.43	0.138878	3.53735	0.146719	6.41165	0.014497
S2 spike	407	421	VRQIAPGQTGKIADY			13	1616.88	S2_Alone	0	1617.89	0.047322	0	0	6.34653	0.046598
S2 spike	407	421	VRQIAPGQTGKIADY			13	1616.88	S2_Alone	0.167	1619.68	0.029826	1.78556	0.055937	6.36317	0.049963
S2 spike	407	421	VRQIAPGQTGKIADY			13	1616.88	S2_Alone	1.667	1620.14	0.093549	2.25087	0.104837	6.38022	0.060695
S2 spike	407	421	VRQIAPGQTGKIADY			13	1616.88	S2_Alone	16.667	1620.9	0.072845	3.00655	0.086866	6.40199	0.007705
S2 spike	407	421	VRQIAPGQTGKIADY			13	1616.88	S2_Alone	166.667	1621.57	0.097885	3.67507	0.108724	6.34685	0.0535
S2 spike	407	421	VRQIAPGQTGKIADY			13	1616.88	S2_FL_complex	0	1617.89	0.047322	0	0	6.34653	0.046598
S2 spike	407	421	VRQIAPGQTGKIADY			13	1616.88	S2_FL_complex	0.167	1619.54	0.096836	1.65069	0.107781	6.37863	0.049065
S2 spike	407	421	VRQIAPGQTGKIADY			13	1616.88	S2_FL_complex	1.667	1620.08	0.103683	2.18659	0.113971	6.40187	0.017603
S2 spike	407	421	VRQIAPGQTGKIADY			13	1616.88	S2_FL_complex	16.667	1620.89	0.03867	2.99645	0.061112	6.37431	0.055251
S2 spike	407	421	VRQIAPGQTGKIADY			13	1616.88	S2_FL_complex	166.667	1621.46	0.148488	3.56485	0.155846	6.35876	0.0388
S2 spike	407	422	VRQIAPGQTGKIADYN			14	1730.92	S2_3A3Fab_complex	0	1732.04	0.031293	0	0	6.15093	0.049044
S2 spike	407	422	VRQIAPGQTGKIADYN			14	1730.92	S2_3A3Fab_complex	0.167	1733.75	0.051885	1.71236	0.060591	6.21675	0.002219
S2 spike	407	422	VRQIAPGQTGKIADYN			14	1730.92	S2_3A3Fab_complex	1.667	1734.28	0.052072	2.24317	0.060751	6.22013	0.005034
S2 spike	407	422	VRQIAPGQTGKIADYN			14	1730.92	S2_3A3Fab_complex	16.667	1735.03	0.113893	2.99388	0.118114	6.18359	0.051787
S2 spike	407	422	VRQIAPGQTGKIADYN			14	1730.92	S2_3A3Fab_complex	166.667	1735.48	0.079696	3.4465	0.08562	6.22351	0.012966
S2 spike	407	422	VRQIAPGQTGKIADYN			14	1730.92	S2_Alone	0	1732.04	0.031293	0	0	6.15093	0.049044
S2 spike	407	422	VRQIAPGQTGKIADYN			14	1730.92	S2_Alone	0.167	1733.84	0.107343	1.79861	0.111811	6.18097	0.044119
S2 spike	407	422	VRQIAPGQTGKIADYN			14	1730.92	S2_Alone	1.667	1734.28	0.11929	2.24113	0.123326	6.1912	0.060052
S2 spike	407	422	VRQIAPGQTGKIADYN			14	1730.92	S2_Alone	16.667	1735.05	0.071542	3.01361	0.078086	6.21927	0.013957
S2 spike	407	422	VRQIAPGQTGKIADYN			14	1730.92	S2_Alone	166.667	1735.64	0.179141	3.59905	0.181854	6.15534	0.055384
S2 spike	407	422	VRQIAPGQTGKIADYN			14	1730.92	S2_FL_complex	0	1732.04	0.031293	0	0	6.15093	0.049044
S2 spike	407	422	VRQIAPGQTGKIADYN			14	1730.92	S2_FL_complex	0.167	1733.74	0.032978	1.70443	0.045462	6.19935	0.051842
S2 spike	407	422	VRQIAPGQTGKIADYN			14	1730.92	S2_FL_complex	1.667	1734.21	0.111647	2.17713	0.11595	6.21913	0.020232
S2 spike	407	422	VRQIAPGQTGKIADYN			14	1730.92	S2_FL_complex	16.667	1735.03	0.034188	2.9891	0.046347	6.1877	0.054216
S2 spike	407	422	VRQIAPGQTGKIADYN			14	1730.92	S2_FL_complex	166.667	1735.54	0.14989	3.49863	0.153121	6.17913	0.038313
S2 spike	421	431	YNYKLPDDFTG			9	1332.61	S2_3A3Fab_complex	0	1333.36	0.023087	0	0	7.3182	0.029158
S2 spike	421	431	YNYKLPDDFTG			9	1332.61	S2_3A3Fab_complex	0.167	1334.15	0.017811	0.792616	0.029159	7.35973	0.000713
S2 spike	421	431	YNYKLPDDFTG			9	1332.61	S2_3A3Fab_complex	1.667	1334.84	0.122733	1.48213	0.124886	7.35576	0.00727
S2 spike	421	431	YNYKLPDDFTG			9	1332.61	S2_3A3Fab_complex	16.667	1334.79	0.070284	1.42876	0.073979	7.3348	0.027184
S2 spike	421	431	YNYKLPDDFTG			9	1332.61	S2_3A3Fab_complex	166.667	1334.88	0.068445	1.5244	0.072234	7.35626	0.013213
S2 spike	421	431	YNYKLPDDFTG			9	1332.61	S2_Alone	0	1333.36	0.023087	0	0	7.3182	0.029158
S2 spike	421	431	YNYKLPDDFTG			9	1332.61	S2_Alone	0.167	1334.24	0.117473	0.882237	0.119721	7.32526	0.025779
S2 spike	421	431	YNYKLPDDFTG			9	1332.61	S2_Alone	1.667	1334.81	0.056624	1.45501	0.06115	7.33337	0.035308
S2 spike	421	431	YNYKLPDDFTG			9	1332.61	S2_Alone	16.667	1334.79	0.090157	1.43081	0.093066	7.35187	0.009774
S2 spike	421	431	YNYKLPDDFTG			9	1332.61	S2_Alone	166.667	1334.93	0.124641	1.57325	0.126761	7.31734	0.031492
S2 spike	421	431	YNYKLPDDFTG			9	1332.61	S2_FL_complex	0	1333.36	0.023087	0	0	7.3182	0.029158
S2 spike	421	431	YNYKLPDDFTG			9	1332.61	S2_FL_complex	0.167	1334.16	0.026133	0.798125	0.03487	7.34228	0.030943
S2 spike	421	431	YNYKLPDDFTG			9	1332.61	S2_FL_complex	1.667	1334.81	0.070171	1.451	0.073871	7.35541	0.011905
S2 spike	421	431	YNYKLPDDFTG			9	1332.61	S2_FL_complex	16.667	1334.74	0.095729	1.38066	0.098473	7.33951	0.03392
S2 spike	421	431	YNYKLPDDFTG			9	1332.61	S2_FL_complex	166.667	1334.97	0.129217	1.61575	0.131264	7.33098	0.018484
S2 spike	422	431	NYKLPDDFTG			8	1169.55	S2_3A3Fab_complex	0	1170.14	0.039533	0	0	7.17744	0.033175
S2 spike	422	431	NYKLPDDFTG			8	1169.55	S2_3A3Fab_complex	0.167	1170.9	0.057673	0.764733	0.069922	7.21938	0.000306
S2 spike	422	431	NYKLPDDFTG			8	1169.55	S2_3A3Fab_complex	1.667	1171.64	0.125418	1.50199	0.131501	7.2198	0.005344
S2 spike	422	431	NYKLPDDFTG			8	1169.55	S2_3A3Fab_complex	16.667	1171.63	0	1.49079	0.039533	7.21326	0
S2 spike	422	431	NYKLPDDFTG			8	1169.55	S2_3A3Fab_complex	166.667	1171.83	0.185997	1.68674	0.190152	7.21353	0.008127
S2 spike	422	431	NYKLPDDFTG			8	1169.55	S2_Alone	0	1170.14	0.039533	0	0	7.17744	0.033175
S2 spike	422	431	NYKLPDDFTG			8	1169.55	S2_Alone	0.167	1170.99	0.045766	0.846672	0.060477	7.17323	0.032182
S2 spike	422	431	NYKLPDDFTG			8	1169.55	S2_Alone	1.667	1171.62	0.096333	1.48445	0.104129	7.17763	0.038727
S2 spike	422	431	NYKLPDDFTG			8	1169.55	S2_Alone	16.667	1171.72	0.037326	1.57725	0.05437	7.22187	0.000997
S2 spike	422	431	NYKLPDDFTG			8	1169.55	S2_Alone	166.667	1171.75	0.070197	1.60951	0.080563	7.18719	0.037956
S2 spike	422	431	NYKLPDDFTG			8	1169.55	S2_FL_complex	0	1170.14	0.039533	0	0	7.17744	0.033175
S2 spike	422	431	NYKLPDDFTG			8	1169.55	S2_FL_complex	0.167	1171.01	0.053194	0.873516	0.066276	7.19514	0.034623
S2 spike	422	431	NYKLPDDFTG			8	1169.55	S2_FL_complex	1.667	1171.68	0.07506	1.54446	0.084835	7.22799	0.000761
S2 spike	422	431	NYKLPDDFTG			8	1169.55	S2_FL_complex	16.667	1171.66	0.084057	1.51676	0.092889	7.17693	0.04051
S2 spike	422	431	NYKLPDDFTG			8	1169.55	S2_FL_complex	166.667	1171.73	0.150231	1.58535	0.155345	7.1779	0.025302
S2 spike	442	449	DSKVGGNY			7	839.389	S2_3A3Fab_complex	0	839.771	0.00553	0	0	5.88584	0.055296
S2 spike	442	449	DSKVGGNY			7	839.389	S2_3A3Fab_complex	0.167	842.748	0.037225	2.97722	0.037633	5.95419	0.003081
S2 spike	442	449	DSKVGGNY			7	839.389	S2_3A3Fab_complex	1.667	842.798	0.038624	3.02668	0.039018	5.9575	0.005557
S2 spike	442	449	DSKVGGNY			7	839.389	S2_3A3Fab_complex	16.667	842.8	0.081714	3.02888	0.081901	5.91125	0.060681
S2 spike	442	449	DSKVGGNY			7	839.389	S2_3A3Fab_complex	166.667	842.8	0.081795	3.02915	0.081981	5.96121	0.014449
S2 spike	442	449	DSKVGGNY			7	839.389	S2_Alone	0	839.771	0.00553	0	0	5.88584	0.055296
S2 spike	442	449	DSKVGGNY			7	839.389	S2_Alone	0.167	842.814	0.054426	3.04256	0.054706	5.91198	0.049486
S2 spike	442	449	DSKVGGNY			7	839.389	S2_Alone	1.667	842.791	0.074204	3.01966	0.07441	5.92365	0.071848
S2 spike	442	449	DSKVGGNY			7	839.389	S2_Alone	16.667	842.732	0.05837	2.9612	0.058632	5.9552	0.015894
S2 spike	442	449	DSKVGGNY			7	839.389	S2_Alone	166.667	842.815	0.06399	3.04425	0.064228	5.88335	0.064394
S2 spike	442	449	DSKVGGNY			7	839.389	S2_FL_complex	0	839.771	0.00553	0	0	5.88584	0.055296
S2 spike	442	449	DSKVGGNY			7	839.389	S2_FL_complex	0.167	842.76	0.063909	2.98944	0.064148	5.93103	0.060259
S2 spike	442	449	DSKVGGNY			7	839.389	S2_FL_complex	1.667	842.802	0.083834	3.03088	0.084016	5.95702	0.018488
S2 spike	442	449	DSKVGGNY			7	839.389	S2_FL_complex	16.667	842.76	0.052776	2.98937	0.053065	5.92016	0.065797
S2 spike	442	449	DSKVGGNY			7	839.389	S2_FL_complex	166.667	842.8	0.106781	3.02932	0.106924	5.90451	0.052138
S2 spike	453	469	YRLFRKSNLKPFERDIS			15	2169.19	S2_3A3Fab_complex	0	2170.43	0.050428	0	0	6.55271	0.040573
S2 spike	453	469	YRLFRKSNLKPFERDIS			15	2169.19	S2_3A3Fab_complex	0.167	2172.17	0.125214	1.73991	0.134987	6.60503	0.002291
S2 spike	453	469	YRLFRKSNLKPFERDIS			15	2169.19	S2_3A3Fab_complex	1.667	2173.27	0.166925	2.84499	0.174376	6.61274	0.011762
S2 spike	453	469	YRLFRKSNLKPFERDIS			15	2169.19	S2_3A3Fab_complex	16.667	2173.83	0.098759	3.40203	0.110889	6.56287	0.040243
S2 spike	453	469	YRLFRKSNLKPFERDIS			15	2169.19	S2_3A3Fab_complex	166.667	2174.58	0.080824	4.15088	0.095265	6.61509	0.010112
S2 spike	453	469	YRLFRKSNLKPFERDIS			15	2169.19	S2_Alone	0	2170.43	0.050428	0	0	6.55271	0.040573
S2 spike	453	469	YRLFRKSNLKPFERDIS			15	2169.19	S2_Alone	0.167	2172.18	0.100594	1.75637	0.112526	6.60096	0.005339
S2 spike	453	469	YRLFRKSNLKPFERDIS			15	2169.19	S2_Alone	1.667	2173.15	0.27164	2.72123	0.276281	6.57334	0.056175
S2 spike	453	469	YRLFRKSNLKPFERDIS			15	2169.19	S2_Alone	16.667	2173.76	0.041657	3.33471	0.065408	6.60223	0.006483
S2 spike	453	469	YRLFRKSNLKPFERDIS			15	2169.19	S2_Alone	166.667	2174.76	0.195842	4.33442	0.20223	6.54985	0.053208
S2 spike	453	469	YRLFRKSNLKPFERDIS			15	2169.19	S2_FL_complex	0	2170.43	0.050428	0	0	6.55271	0.040573
S2 spike	453	469	YRLFRKSNLKPFERDIS			15	2169.19	S2_FL_complex	0.167	2172.35	0.044837	1.92302	0.067478	6.57092	0.051126
S2 spike	453	469	YRLFRKSNLKPFERDIS			15	2169.19	S2_FL_complex	1.667	2173.05	0.14557	2.62441	0.154057	6.59429	0.007707
S2 spike	453	469	YRLFRKSNLKPFERDIS			15	2169.19	S2_FL_complex	16.667	2173.72	0.212054	3.29239	0.217968	6.5438	0.052172
S2 spike	453	469	YRLFRKSNLKPFERDIS			15	2169.19	S2_FL_complex	166.667	2174.64	0.252207	4.21755	0.257199	6.55893	0.032634
S2 spike	453	471	YRLFRKSNLKPFERDISTE			17	2399.28	S2_3A3Fab_complex	0	2400.64	0.011661	0	0	6.61412	0.039537
S2 spike	453	471	YRLFRKSNLKPFERDISTE			17	2399.28	S2_3A3Fab_complex	0.167	2402.99	0.172045	2.34603	0.17244	6.65923	0.003732
S2 spike	453	471	YRLFRKSNLKPFERDISTE			17	2399.28	S2_3A3Fab_complex	1.667	2404.1	0.082991	3.46454	0.083806	6.66332	0.009805
S2 spike	453	471	YRLFRKSNLKPFERDISTE			17	2399.28	S2_3A3Fab_complex	16.667	2404.76	0.023964	4.11571	0.02665	6.62768	0.042451
S2 spike	453	471	YRLFRKSNLKPFERDISTE			17	2399.28	S2_3A3Fab_complex	166.667	2405.9	0.124266	5.2568	0.124812	6.66045	0.012213
S2 spike	453	471	YRLFRKSNLKPFERDISTE			17	2399.28	S2_Alone	0	2400.64	0.011661	0	0	6.61412	0.039537
S2 spike	453	471	YRLFRKSNLKPFERDISTE			17	2399.28	S2_Alone	0.167	2402.82	0.329682	2.1801	0.329889	6.62544	0.041769
S2 spike	453	471	YRLFRKSNLKPFERDISTE			17	2399.28	S2_Alone	1.667	2404.02	0.230973	3.37643	0.231267	6.63529	0.055113
S2 spike	453	471	YRLFRKSNLKPFERDISTE			17	2399.28	S2_Alone	16.667	2404.82	0.308759	4.18409	0.308979	6.65956	0.012465
S2 spike	453	471	YRLFRKSNLKPFERDISTE			17	2399.28	S2_Alone	166.667	2405.78	0.313801	5.13933	0.314018	6.61782	0.044847
S2 spike	453	471	YRLFRKSNLKPFERDISTE			17	2399.28	S2_FL_complex	0	2400.64	0.011661	0	0	6.61412	0.039537
S2 spike	453	471	YRLFRKSNLKPFERDISTE			17	2399.28	S2_FL_complex	0.167	2403.3	0.114142	2.66375	0.114736	6.64227	0.041899
S2 spike	453	471	YRLFRKSNLKPFERDISTE			17	2399.28	S2_FL_complex	1.667	2404.19	0.272116	3.55312	0.272366	6.6585	0.014378
S2 spike	453	471	YRLFRKSNLKPFERDISTE			17	2399.28	S2_FL_complex	16.667	2404.89	0.187744	4.25333	0.188106	6.63724	0.046717
S2 spike	453	471	YRLFRKSNLKPFERDISTE			17	2399.28	S2_FL_complex	166.667	2406.03	0.267337	5.38998	0.267591	6.61994	0.033059
S2 spike	455	470	LFRKSNLKPFERDIST			14	1951.08	S2_3A3Fab_complex	0	1952.2	0.029994	0	0	6.57472	0.042391
S2 spike	455	470	LFRKSNLKPFERDIST			14	1951.08	S2_3A3Fab_complex	0.167	1953.41	0.105263	1.20762	0.109453	6.62462	0.0021
S2 spike	455	470	LFRKSNLKPFERDIST			14	1951.08	S2_3A3Fab_complex	1.667	1954.26	0.064059	2.05662	0.070734	6.62176	0.003482
S2 spike	455	470	LFRKSNLKPFERDIST			14	1951.08	S2_3A3Fab_complex	16.667	1954.62	0.126821	2.4203	0.13032	6.57639	0.04162
S2 spike	455	470	LFRKSNLKPFERDIST			14	1951.08	S2_3A3Fab_complex	166.667	1955.49	0.231631	3.28914	0.233565	6.62253	0.011034
S2 spike	455	470	LFRKSNLKPFERDIST			14	1951.08	S2_Alone	0	1952.2	0.029994	0	0	6.57472	0.042391
S2 spike	455	470	LFRKSNLKPFERDIST			14	1951.08	S2_Alone	0.167	1953.35	0.04548	1.14862	0.05448	6.61772	0.008365
S2 spike	455	470	LFRKSNLKPFERDIST			14	1951.08	S2_Alone	1.667	1954.19	0.006179	1.98948	0.030624	6.63711	0.009443
S2 spike	455	470	LFRKSNLKPFERDIST			14	1951.08	S2_Alone	16.667	1954.59	0.074707	2.38822	0.080503	6.62327	0.015742
S2 spike	455	470	LFRKSNLKPFERDIST			14	1951.08	S2_Alone	166.667	1955.65	0.27762	3.45009	0.279235	6.56711	0.05105
S2 spike	455	470	LFRKSNLKPFERDIST			14	1951.08	S2_FL_complex	0	1952.2	0.029994	0	0	6.57472	0.042391
S2 spike	455	470	LFRKSNLKPFERDIST			14	1951.08	S2_FL_complex	0.167	1953.42	0.146544	1.22128	0.149582	6.63317	0.015064
S2 spike	455	470	LFRKSNLKPFERDIST			14	1951.08	S2_FL_complex	1.667	1954.18	0.058002	1.98072	0.065298	6.61598	0.011358
S2 spike	455	470	LFRKSNLKPFERDIST			14	1951.08	S2_FL_complex	16.667	1954.62	0.138653	2.42053	0.14186	6.59731	0.053547
S2 spike	455	470	LFRKSNLKPFERDIST			14	1951.08	S2_FL_complex	166.667	1955.56	0.199843	3.35633	0.202081	6.57048	0.032004
S2 spike	456	471	FRKSNLKPFERDISTE			14	1967.03	S2_3A3Fab_complex	0	1967.93	0.136458	0	0	6.30457	0.048647
S2 spike	456	471	FRKSNLKPFERDISTE			14	1967.03	S2_3A3Fab_complex	0.167	1970.67	0.003065	2.73679	0.136492	6.38839	0.001045
S2 spike	456	471	FRKSNLKPFERDISTE			14	1967.03	S2_3A3Fab_complex	1.667	1971.51	0.173001	3.58484	0.220341	6.37757	0.008754
S2 spike	456	471	FRKSNLKPFERDISTE			14	1967.03	S2_3A3Fab_complex	16.667	1971.98	0.075007	4.05513	0.155714	6.31889	0.045727
S2 spike	456	471	FRKSNLKPFERDISTE			14	1967.03	S2_3A3Fab_complex	166.667	1972.86	0.096986	4.92692	0.167413	6.38988	0.012834
S2 spike	456	471	FRKSNLKPFERDISTE			14	1967.03	S2_Alone	0	1967.98	0.040873	0	0	6.29652	0.045919
S2 spike	456	471	FRKSNLKPFERDISTE			14	1967.03	S2_Alone	0.167	1970.82	2.27374e-13	2.83882	0.040873	6.28269	0
S2 spike	456	471	FRKSNLKPFERDISTE			14	1967.03	S2_Alone	1.667	1971.48	0.1106	3.50024	0.117911	6.30763	0.054016
S2 spike	456	471	FRKSNLKPFERDISTE			14	1967.03	S2_Alone	16.667	1971.92	0.018456	3.94783	0.044847	6.36656	0.004539
S2 spike	456	471	FRKSNLKPFERDISTE			14	1967.03	S2_Alone	166.667	1973.14	0.203359	5.16509	0.207426	6.29763	0.047218
S2 spike	456	471	FRKSNLKPFERDISTE			14	1967.03	S2_FL_complex	0	1967.93	0.136458	0	0	6.30457	0.048647
S2 spike	456	471	FRKSNLKPFERDISTE			14	1967.03	S2_FL_complex	0.167	1970.64	0.048984	2.7058	0.144983	6.34554	0.050645
S2 spike	456	471	FRKSNLKPFERDISTE			14	1967.03	S2_FL_complex	1.667	1971.38	0.107186	3.45148	0.173521	6.36953	0.010055
S2 spike	456	471	FRKSNLKPFERDISTE			14	1967.03	S2_FL_complex	16.667	1971.94	0.041057	4.01188	0.142501	6.31662	0.05633
S2 spike	456	471	FRKSNLKPFERDISTE			14	1967.03	S2_FL_complex	166.667	1972.87	0.221704	4.94084	0.260333	6.33175	0.042141
S2 spike	542	552	NFNGLTGTGVL			10	1092.57	S2_3A3Fab_complex	0	1093.24	0.042846	0	0	7.85081	0.018593
S2 spike	542	552	NFNGLTGTGVL			10	1092.57	S2_3A3Fab_complex	0.167	1093.92	0.02199	0.683276	0.048159	7.87323	0.002122
S2 spike	542	552	NFNGLTGTGVL			10	1092.57	S2_3A3Fab_complex	1.667	1094.36	0.067054	1.11562	0.079574	7.87044	0.010279
S2 spike	542	552	NFNGLTGTGVL			10	1092.57	S2_3A3Fab_complex	16.667	1095.1	0.064044	1.86233	0.077055	7.85026	0.017384
S2 spike	542	552	NFNGLTGTGVL			10	1092.57	S2_3A3Fab_complex	166.667	1095.81	0.03492	2.57192	0.055273	7.87617	0.007598
S2 spike	542	552	NFNGLTGTGVL			10	1092.57	S2_Alone	0	1093.24	0.042846	0	0	7.85081	0.018593
S2 spike	542	552	NFNGLTGTGVL			10	1092.57	S2_Alone	0.167	1093.92	0.072302	0.679398	0.084043	7.85403	0.017836
S2 spike	542	552	NFNGLTGTGVL			10	1092.57	S2_Alone	1.667	1094.32	0.079396	1.07891	0.090219	7.86015	0.021569
S2 spike	542	552	NFNGLTGTGVL			10	1092.57	S2_Alone	16.667	1095.13	0.066927	1.89365	0.079467	7.87213	0.006932
S2 spike	542	552	NFNGLTGTGVL			10	1092.57	S2_Alone	166.667	1095.94	0.098526	2.70512	0.107439	7.85188	0.022449
S2 spike	542	552	NFNGLTGTGVL			10	1092.57	S2_FL_complex	0	1093.24	0.042846	0	0	7.85081	0.018593
S2 spike	542	552	NFNGLTGTGVL			10	1092.57	S2_FL_complex	0.167	1093.92	0.056566	0.684091	0.070961	7.86167	0.019127
S2 spike	542	552	NFNGLTGTGVL			10	1092.57	S2_FL_complex	1.667	1094.3	0.04886	1.06353	0.064985	7.87088	0.003932
S2 spike	542	552	NFNGLTGTGVL			10	1092.57	S2_FL_complex	16.667	1095.07	0.032256	1.82579	0.05363	7.84351	0.018672
S2 spike	542	552	NFNGLTGTGVL			10	1092.57	S2_FL_complex	166.667	1095.92	0.097048	2.67688	0.106085	7.84994	0.012231
S2 spike	544	552	NGLTGTGVL			8	831.457	S2_3A3Fab_complex	0	831.88	0.020435	0	0	7.44221	0.026824
S2 spike	544	552	NGLTGTGVL			8	831.457	S2_3A3Fab_complex	0.167	832.181	0.008617	0.300519	0.022178	7.47856	0.002215
S2 spike	544	552	NGLTGTGVL			8	831.457	S2_3A3Fab_complex	1.667	832.378	0.001049	0.497462	0.020462	7.47146	0.008426
S2 spike	544	552	NGLTGTGVL			8	831.457	S2_3A3Fab_complex	16.667	832.832	0.03744	0.951342	0.042654	7.45336	0.027722
S2 spike	544	552	NGLTGTGVL			8	831.457	S2_3A3Fab_complex	166.667	833.404	0.031196	1.52378	0.037293	7.47582	0.0123
S2 spike	544	552	NGLTGTGVL			8	831.457	S2_Alone	0	831.88	0.020435	0	0	7.44221	0.026824
S2 spike	544	552	NGLTGTGVL			8	831.457	S2_Alone	0.167	832.193	0.025421	0.312442	0.032616	7.45125	0.025472
S2 spike	544	552	NGLTGTGVL			8	831.457	S2_Alone	1.667	832.365	0.054583	0.48469	0.058283	7.44041	0.033548
S2 spike	544	552	NGLTGTGVL			8	831.457	S2_Alone	16.667	832.866	0.033872	0.985269	0.039559	7.472	0.010519
S2 spike	544	552	NGLTGTGVL			8	831.457	S2_Alone	166.667	833.48	0.043744	1.59909	0.048282	7.45011	0.031708
S2 spike	544	552	NGLTGTGVL			8	831.457	S2_FL_complex	0	831.88	0.020435	0	0	7.44221	0.026824
S2 spike	544	552	NGLTGTGVL			8	831.457	S2_FL_complex	0.167	832.199	0.032156	0.318376	0.0381	7.46291	0.028347
S2 spike	544	552	NGLTGTGVL			8	831.457	S2_FL_complex	1.667	832.313	0.021854	0.433009	0.02992	7.47361	0.015485
S2 spike	544	552	NGLTGTGVL			8	831.457	S2_FL_complex	16.667	832.81	0.026121	0.929843	0.033165	7.4577	0.031885
S2 spike	544	552	NGLTGTGVL			8	831.457	S2_FL_complex	166.667	833.389	0.061073	1.50818	0.064401	7.4489	0.019449
S2 spike	544	568	NGLTGTGVLTESNKKFLPFQQFGRD			23	2754.42	S2_3A3Fab_complex	0	2756	0.029278	0	0	7.39566	0.02824
S2 spike	544	568	NGLTGTGVLTESNKKFLPFQQFGRD			23	2754.42	S2_3A3Fab_complex	0.167	2759.64	0.040868	3.64366	0.050273	7.43758	0.001334
S2 spike	544	568	NGLTGTGVLTESNKKFLPFQQFGRD			23	2754.42	S2_3A3Fab_complex	1.667	2762.42	0.170292	6.4204	0.17279	7.43148	0.007291
S2 spike	544	568	NGLTGTGVLTESNKKFLPFQQFGRD			23	2754.42	S2_3A3Fab_complex	16.667	2763.47	0.266057	7.47174	0.267663	7.41337	0.029559
S2 spike	544	568	NGLTGTGVLTESNKKFLPFQQFGRD			23	2754.42	S2_3A3Fab_complex	166.667	2764.02	0.323584	8.01914	0.324906	7.43406	0.013066
S2 spike	544	568	NGLTGTGVLTESNKKFLPFQQFGRD			23	2754.42	S2_Alone	0	2756	0.029278	0	0	7.39566	0.02824
S2 spike	544	568	NGLTGTGVLTESNKKFLPFQQFGRD			23	2754.42	S2_Alone	0.167	2759.68	0.255313	3.68176	0.256986	7.40522	0.025441
S2 spike	544	568	NGLTGTGVLTESNKKFLPFQQFGRD			23	2754.42	S2_Alone	1.667	2762.17	0.234385	6.1741	0.236207	7.40708	0.03312
S2 spike	544	568	NGLTGTGVLTESNKKFLPFQQFGRD			23	2754.42	S2_Alone	16.667	2763.32	0.196267	7.32332	0.198439	7.42646	0.009884
S2 spike	544	568	NGLTGTGVLTESNKKFLPFQQFGRD			23	2754.42	S2_Alone	166.667	2763.99	0.278493	7.99132	0.280027	7.39702	0.030381
S2 spike	544	568	NGLTGTGVLTESNKKFLPFQQFGRD			23	2754.42	S2_FL_complex	0	2756	0.029278	0	0	7.39566	0.02824
S2 spike	544	568	NGLTGTGVLTESNKKFLPFQQFGRD			23	2754.42	S2_FL_complex	0.167	2759.7	0.078455	3.70341	0.08374	7.42429	0.027459
S2 spike	544	568	NGLTGTGVLTESNKKFLPFQQFGRD			23	2754.42	S2_FL_complex	1.667	2762.24	0.289596	6.24706	0.291073	7.43181	0.00983
S2 spike	544	568	NGLTGTGVLTESNKKFLPFQQFGRD			23	2754.42	S2_FL_complex	16.667	2763.61	0.150972	7.61268	0.153785	7.41417	0.028752
S2 spike	544	568	NGLTGTGVLTESNKKFLPFQQFGRD			23	2754.42	S2_FL_complex	166.667	2764.19	0.157793	8.19375	0.160486	7.40532	0.015535
S2 spike	553	565	TESNKKFLPFQQF			11	1613.83	S2_3A3Fab_complex	0	1614.84	0.035679	0	0	7.51974	0.028345
S2 spike	553	565	TESNKKFLPFQQF			11	1613.83	S2_3A3Fab_complex	0.167	1617.2	0	2.35995	0.035679	7.55059	0
S2 spike	553	565	TESNKKFLPFQQF			11	1613.83	S2_3A3Fab_complex	1.667	1619.1	0.004986	4.25926	0.036026	7.54752	0.001284
S2 spike	553	565	TESNKKFLPFQQF			11	1613.83	S2_3A3Fab_complex	16.667	1619.48	0.139641	4.63328	0.144127	7.52556	0.023722
S2 spike	553	565	TESNKKFLPFQQF			11	1613.83	S2_3A3Fab_complex	166.667	1619.63	0.107056	4.78618	0.112845	7.54629	0.015838
S2 spike	553	565	TESNKKFLPFQQF			11	1613.83	S2_Alone	0	1614.84	0.035679	0	0	7.51974	0.028345
S2 spike	553	565	TESNKKFLPFQQF			11	1613.83	S2_Alone	0.167	1617.13	0.068713	2.28915	0.077424	7.51268	0.022993
S2 spike	553	565	TESNKKFLPFQQF			11	1613.83	S2_Alone	1.667	1618.95	0.153099	4.11051	0.157201	7.53026	0.034431
S2 spike	553	565	TESNKKFLPFQQF			11	1613.83	S2_Alone	16.667	1619.54	0.136186	4.69861	0.140782	7.54903	0.01312
S2 spike	553	565	TESNKKFLPFQQF			11	1613.83	S2_Alone	166.667	1619.57	0.14058	4.73096	0.145037	7.51709	0.031123
S2 spike	553	565	TESNKKFLPFQQF			11	1613.83	S2_FL_complex	0	1614.84	0.035679	0	0	7.51974	0.028345
S2 spike	553	565	TESNKKFLPFQQF			11	1613.83	S2_FL_complex	0.167	1617.24	0.073901	2.39319	0.082063	7.53758	0.027531
S2 spike	553	565	TESNKKFLPFQQF			11	1613.83	S2_FL_complex	1.667	1619.01	0.046586	4.17115	0.058679	7.54693	0.007607
S2 spike	553	565	TESNKKFLPFQQF			11	1613.83	S2_FL_complex	16.667	1619.66	0	4.81301	0.035679	7.484	0
S2 spike	553	565	TESNKKFLPFQQF			11	1613.83	S2_FL_complex	166.667	1619.66	0.065027	4.82139	0.074172	7.52702	0.009492
S2 spike	553	568	TESNKKFLPFQQFGRD			14	1941.98	S2_3A3Fab_complex	0	1943.22	0.028466	0	0	7.08778	0.034621
S2 spike	553	568	TESNKKFLPFQQFGRD			14	1941.98	S2_3A3Fab_complex	0.167	1945.94	0.013056	2.72334	0.031318	7.13348	0.005019
S2 spike	553	568	TESNKKFLPFQQFGRD			14	1941.98	S2_3A3Fab_complex	1.667	1948.39	0	5.16997	0.028466	7.13809	0
S2 spike	553	568	TESNKKFLPFQQFGRD			14	1941.98	S2_3A3Fab_complex	16.667	1949.21	0	5.99224	0.028466	7.06446	0
S2 spike	553	568	TESNKKFLPFQQFGRD			14	1941.98	S2_3A3Fab_complex	166.667	1949.14	0.190812	5.9177	0.192924	7.12816	0.013825
S2 spike	553	568	TESNKKFLPFQQFGRD			14	1941.98	S2_Alone	0	1943.22	0.028466	0	0	7.08778	0.034621
S2 spike	553	568	TESNKKFLPFQQFGRD			14	1941.98	S2_Alone	0.167	1946.04	0.143381	2.82192	0.146179	7.10518	0.027261
S2 spike	553	568	TESNKKFLPFQQFGRD			14	1941.98	S2_Alone	1.667	1948.35	0.131825	5.13135	0.134863	7.09826	0.041438
S2 spike	553	568	TESNKKFLPFQQFGRD			14	1941.98	S2_Alone	16.667	1949.03	0.116119	5.80861	0.119557	7.1319	0.009877
S2 spike	553	568	TESNKKFLPFQQFGRD			14	1941.98	S2_Alone	166.667	1949.24	0.143112	6.01528	0.145916	7.10584	0.037458
S2 spike	553	568	TESNKKFLPFQQFGRD			14	1941.98	S2_FL_complex	0	1943.22	0.028466	0	0	7.08778	0.034621
S2 spike	553	568	TESNKKFLPFQQFGRD			14	1941.98	S2_FL_complex	0.167	1946.06	0.066637	2.83964	0.072463	7.11544	0.032042
S2 spike	553	568	TESNKKFLPFQQFGRD			14	1941.98	S2_FL_complex	1.667	1948.26	0.123567	5.04476	0.126804	7.12651	0.014525
S2 spike	553	568	TESNKKFLPFQQFGRD			14	1941.98	S2_FL_complex	16.667	1949.12	0.085863	5.90033	0.090458	7.09153	0.038922
S2 spike	553	568	TESNKKFLPFQQFGRD			14	1941.98	S2_FL_complex	166.667	1949.14	0.117096	5.91707	0.120506	7.07734	0.021513
S2 spike	566	574	GRDIADTTD			8	963.438	S2_3A3Fab_complex	0	963.86	0.035995	0	0	5.73658	0.056588
S2 spike	566	574	GRDIADTTD			8	963.438	S2_3A3Fab_complex	0.167	965.722	0.019349	1.86215	0.040866	5.80907	0.003618
S2 spike	566	574	GRDIADTTD			8	963.438	S2_3A3Fab_complex	1.667	966.726	0.030114	2.86687	0.046931	5.81165	0.007611
S2 spike	566	574	GRDIADTTD			8	963.438	S2_3A3Fab_complex	16.667	967.288	0.060642	3.42886	0.07052	5.76125	0.062448
S2 spike	566	574	GRDIADTTD			8	963.438	S2_3A3Fab_complex	166.667	967.315	0.005507	3.45591	0.036414	5.81598	0.017434
S2 spike	566	574	GRDIADTTD			8	963.438	S2_Alone	0	963.86	0.035995	0	0	5.73658	0.056588
S2 spike	566	574	GRDIADTTD			8	963.438	S2_Alone	0.167	965.686	0.051375	1.82677	0.06273	5.75962	0.053604
S2 spike	566	574	GRDIADTTD			8	963.438	S2_Alone	1.667	966.675	0.101826	2.81535	0.108001	5.7705	0.075455
S2 spike	566	574	GRDIADTTD			8	963.438	S2_Alone	16.667	967.254	0.101496	3.39491	0.107689	5.80759	0.016501
S2 spike	566	574	GRDIADTTD			8	963.438	S2_Alone	166.667	967.387	0.091898	3.52776	0.098696	5.73073	0.063866
S2 spike	566	574	GRDIADTTD			8	963.438	S2_FL_complex	0	963.86	0.035995	0	0	5.73658	0.056588
S2 spike	566	574	GRDIADTTD			8	963.438	S2_FL_complex	0.167	965.769	0.066142	1.90906	0.075302	5.79152	0.061297
S2 spike	566	574	GRDIADTTD			8	963.438	S2_FL_complex	1.667	966.727	0.11024	2.86768	0.115968	5.81178	0.01742
S2 spike	566	574	GRDIADTTD			8	963.438	S2_FL_complex	16.667	967.288	0.089134	3.42836	0.096128	5.76895	0.067375
S2 spike	566	574	GRDIADTTD			8	963.438	S2_FL_complex	166.667	967.426	0.049407	3.56635	0.061129	5.76831	0.04855
S2 spike	569	581	IADTTDAVRDPQT			11	1402.68	S2_3A3Fab_complex	0	1403.51	0.086378	0	0	5.98018	0.051132
S2 spike	569	581	IADTTDAVRDPQT			11	1402.68	S2_3A3Fab_complex	0.167	1404.8	0.032399	1.29736	0.092254	6.0513	0.001677
S2 spike	569	581	IADTTDAVRDPQT			11	1402.68	S2_3A3Fab_complex	1.667	1405.55	0.051351	2.04721	0.100489	6.05594	0.008666
S2 spike	569	581	IADTTDAVRDPQT			11	1402.68	S2_3A3Fab_complex	16.667	1406.88	0.137249	3.37012	0.162168	6.00334	0.057892
S2 spike	569	581	IADTTDAVRDPQT			11	1402.68	S2_3A3Fab_complex	166.667	1407.62	0.030542	4.11357	0.091618	6.05463	0.013736
S2 spike	569	581	IADTTDAVRDPQT			11	1402.68	S2_Alone	0	1403.51	0.086378	0	0	5.98018	0.051132
S2 spike	569	581	IADTTDAVRDPQT			11	1402.68	S2_Alone	0.167	1404.83	0.090038	1.32809	0.124771	6.00382	0.048449
S2 spike	569	581	IADTTDAVRDPQT			11	1402.68	S2_Alone	1.667	1405.49	0.122252	1.98825	0.149688	5.99383	0.060407
S2 spike	569	581	IADTTDAVRDPQT			11	1402.68	S2_Alone	16.667	1406.87	0.047204	3.36611	0.098434	6.05559	0.012483
S2 spike	569	581	IADTTDAVRDPQT			11	1402.68	S2_Alone	166.667	1407.73	0.109679	4.22379	0.139609	5.97508	0.056023
S2 spike	569	581	IADTTDAVRDPQT			11	1402.68	S2_FL_complex	0	1403.51	0.086378	0	0	5.98018	0.051132
S2 spike	569	581	IADTTDAVRDPQT			11	1402.68	S2_FL_complex	0.167	1404.86	0.104024	1.35055	0.135211	6.01992	0.061242
S2 spike	569	581	IADTTDAVRDPQT			11	1402.68	S2_FL_complex	1.667	1405.54	0.135828	2.03818	0.160967	6.04985	0.019557
S2 spike	569	581	IADTTDAVRDPQT			11	1402.68	S2_FL_complex	16.667	1406.88	0.084782	3.37751	0.121033	6.0088	0.065243
S2 spike	569	581	IADTTDAVRDPQT			11	1402.68	S2_FL_complex	166.667	1407.67	0.148178	4.16444	0.171516	5.99267	0.035061
S2 spike	569	583	IADTTDAVRDPQTLE			13	1644.81	S2_3A3Fab_complex	0	1645.72	0.069337	0	0	6.53137	0.042976
S2 spike	569	583	IADTTDAVRDPQTLE			13	1644.81	S2_3A3Fab_complex	0.167	1647.23	0.025617	1.5068	0.073918	6.59714	0.001753
S2 spike	569	583	IADTTDAVRDPQTLE			13	1644.81	S2_3A3Fab_complex	1.667	1648.43	0.030965	2.70437	0.075937	6.59313	0.007895
S2 spike	569	583	IADTTDAVRDPQTLE			13	1644.81	S2_3A3Fab_complex	16.667	1649.98	0.153201	4.25558	0.168161	6.55186	0.050711
S2 spike	569	583	IADTTDAVRDPQTLE			13	1644.81	S2_3A3Fab_complex	166.667	1650.87	0.089235	5.15189	0.113007	6.59406	0.01213
S2 spike	569	583	IADTTDAVRDPQTLE			13	1644.81	S2_Alone	0	1645.72	0.069337	0	0	6.53137	0.042976
S2 spike	569	583	IADTTDAVRDPQTLE			13	1644.81	S2_Alone	0.167	1647.32	0.108664	1.59657	0.128901	6.55234	0.042413
S2 spike	569	583	IADTTDAVRDPQTLE			13	1644.81	S2_Alone	1.667	1648.36	0.133732	2.63674	0.150638	6.56349	0.057745
S2 spike	569	583	IADTTDAVRDPQTLE			13	1644.81	S2_Alone	16.667	1650.01	0.127434	4.28489	0.145076	6.59133	0.012338
S2 spike	569	583	IADTTDAVRDPQTLE			13	1644.81	S2_Alone	166.667	1650.96	0.213597	5.23372	0.224569	6.52799	0.051896
S2 spike	569	583	IADTTDAVRDPQTLE			13	1644.81	S2_FL_complex	0	1645.72	0.069337	0	0	6.53137	0.042976
S2 spike	569	583	IADTTDAVRDPQTLE			13	1644.81	S2_FL_complex	0.167	1647.27	0.029124	1.54649	0.075205	6.57632	0.049499
S2 spike	569	583	IADTTDAVRDPQTLE			13	1644.81	S2_FL_complex	1.667	1648.33	0.114338	2.61127	0.133719	6.59369	0.015126
S2 spike	569	583	IADTTDAVRDPQTLE			13	1644.81	S2_FL_complex	16.667	1650.03	0.042329	4.30646	0.081236	6.56432	0.05383
S2 spike	569	583	IADTTDAVRDPQTLE			13	1644.81	S2_FL_complex	166.667	1650.94	0.183937	5.21378	0.196571	6.55834	0.035982
S2 spike	569	584	IADTTDAVRDPQTLEI			14	1757.89	S2_3A3Fab_complex	0	1758.81	0.020556	0	0	7.22883	0.030597
S2 spike	569	584	IADTTDAVRDPQTLEI			14	1757.89	S2_3A3Fab_complex	0.167	1760.36	0.088286	1.54598	0.090648	7.2654	0.000573
S2 spike	569	584	IADTTDAVRDPQTLEI			14	1757.89	S2_3A3Fab_complex	1.667	1761.68	0.049568	2.86781	0.053661	7.26673	0.010183
S2 spike	569	584	IADTTDAVRDPQTLEI			14	1757.89	S2_3A3Fab_complex	16.667	1763.8	0.080506	4.98261	0.083089	7.23364	0.033169
S2 spike	569	584	IADTTDAVRDPQTLEI			14	1757.89	S2_3A3Fab_complex	166.667	1764.74	0.202642	5.92758	0.203682	7.26671	0.01156
S2 spike	569	584	IADTTDAVRDPQTLEI			14	1757.89	S2_Alone	0	1758.81	0.020556	0	0	7.22883	0.030597
S2 spike	569	584	IADTTDAVRDPQTLEI			14	1757.89	S2_Alone	0.167	1760.44	0.170161	1.62514	0.171398	7.23617	0.030004
S2 spike	569	584	IADTTDAVRDPQTLEI			14	1757.89	S2_Alone	1.667	1761.74	0.055087	2.92329	0.058797	7.242	0.03829
S2 spike	569	584	IADTTDAVRDPQTLEI			14	1757.89	S2_Alone	16.667	1763.79	0.10943	4.97939	0.111344	7.26609	0.009469
S2 spike	569	584	IADTTDAVRDPQTLEI			14	1757.89	S2_Alone	166.667	1764.8	0.21973	5.99203	0.220689	7.22605	0.037815
S2 spike	569	584	IADTTDAVRDPQTLEI			14	1757.89	S2_FL_complex	0	1758.81	0.020556	0	0	7.22883	0.030597
S2 spike	569	584	IADTTDAVRDPQTLEI			14	1757.89	S2_FL_complex	0.167	1760.47	0.173754	1.65388	0.174965	7.24773	0.030621
S2 spike	569	584	IADTTDAVRDPQTLEI			14	1757.89	S2_FL_complex	1.667	1761.58	0.125329	2.77201	0.127003	7.25511	0.013446
S2 spike	569	584	IADTTDAVRDPQTLEI			14	1757.89	S2_FL_complex	16.667	1763.7	0.160374	4.88619	0.161686	7.24214	0.036769
S2 spike	569	584	IADTTDAVRDPQTLEI			14	1757.89	S2_FL_complex	166.667	1764.88	0.139905	6.06718	0.141407	7.23158	0.021872
S2 spike	569	585	IADTTDAVRDPQTLEIL			15	1870.98	S2_3A3Fab_complex	0	1872.06	0.07523	0	0	7.58518	0.020749
S2 spike	569	585	IADTTDAVRDPQTLEIL			15	1870.98	S2_3A3Fab_complex	0.167	1873.76	0.1278	1.69827	0.148299	7.61211	0.001644
S2 spike	569	585	IADTTDAVRDPQTLEIL			15	1870.98	S2_3A3Fab_complex	1.667	1875.11	0.064744	3.0448	0.099254	7.60826	0.008666
S2 spike	569	585	IADTTDAVRDPQTLEIL			15	1870.98	S2_3A3Fab_complex	16.667	1876.94	0.094393	4.87997	0.120705	7.58624	0.019259
S2 spike	569	585	IADTTDAVRDPQTLEIL			15	1870.98	S2_3A3Fab_complex	166.667	1877.99	0.179342	5.927	0.194482	7.60453	0.00887
S2 spike	569	585	IADTTDAVRDPQTLEIL			15	1870.98	S2_Alone	0	1872.06	0.07523	0	0	7.58518	0.020749
S2 spike	569	585	IADTTDAVRDPQTLEIL			15	1870.98	S2_Alone	0.167	1873.84	0.115533	1.78125	0.137867	7.58752	0.013415
S2 spike	569	585	IADTTDAVRDPQTLEIL			15	1870.98	S2_Alone	1.667	1875.05	0.064048	2.99278	0.098802	7.59552	0.022251
S2 spike	569	585	IADTTDAVRDPQTLEIL			15	1870.98	S2_Alone	16.667	1876.86	0.120214	4.80311	0.141813	7.61054	0.004999
S2 spike	569	585	IADTTDAVRDPQTLEIL			15	1870.98	S2_Alone	166.667	1877.85	0.142563	5.7939	0.161195	7.58921	0.026261
S2 spike	569	585	IADTTDAVRDPQTLEIL			15	1870.98	S2_FL_complex	0	1872.06	0.07523	0	0	7.58518	0.020749
S2 spike	569	585	IADTTDAVRDPQTLEIL			15	1870.98	S2_FL_complex	0.167	1873.75	0.037179	1.68919	0.083916	7.60517	0.022899
S2 spike	569	585	IADTTDAVRDPQTLEIL			15	1870.98	S2_FL_complex	1.667	1874.92	0.14275	2.85513	0.16136	7.60741	0.013285
S2 spike	569	585	IADTTDAVRDPQTLEIL			15	1870.98	S2_FL_complex	16.667	1876.81	0.060786	4.75453	0.096719	7.60475	0.021277
S2 spike	569	585	IADTTDAVRDPQTLEIL			15	1870.98	S2_FL_complex	166.667	1877.89	0.096522	5.82871	0.122377	7.58871	0.011272
S2 spike	575	583	AVRDPQTLE			7	1028.54	S2_3A3Fab_complex	0	1029.23	0.040537	0	0	6.09002	0.044677
S2 spike	575	583	AVRDPQTLE			7	1028.54	S2_3A3Fab_complex	0.167	1029.53	0.046646	0.302488	0.061799	6.14897	0.004209
S2 spike	575	583	AVRDPQTLE			7	1028.54	S2_3A3Fab_complex	1.667	1030.23	0.025667	1.00416	0.04798	6.15216	0.007695
S2 spike	575	583	AVRDPQTLE			7	1028.54	S2_3A3Fab_complex	16.667	1031.39	0.065157	2.16139	0.076738	6.12315	0.051059
S2 spike	575	583	AVRDPQTLE			7	1028.54	S2_3A3Fab_complex	166.667	1031.96	0.016636	2.73719	0.043818	6.15311	0.013834
S2 spike	575	583	AVRDPQTLE			7	1028.54	S2_Alone	0	1029.23	0.040537	0	0	6.09002	0.044677
S2 spike	575	583	AVRDPQTLE			7	1028.54	S2_Alone	0.167	1029.54	0.062461	0.317533	0.074462	6.11922	0.042361
S2 spike	575	583	AVRDPQTLE			7	1028.54	S2_Alone	1.667	1030.29	0.082125	1.06328	0.091585	6.11648	0.059318
S2 spike	575	583	AVRDPQTLE			7	1028.54	S2_Alone	16.667	1031.46	0.086202	2.23414	0.095258	6.1525	0.014778
S2 spike	575	583	AVRDPQTLE			7	1028.54	S2_Alone	166.667	1032	0.068786	2.77246	0.079842	6.09795	0.056452
S2 spike	575	583	AVRDPQTLE			7	1028.54	S2_FL_complex	0	1029.23	0.040537	0	0	6.09002	0.044677
S2 spike	575	583	AVRDPQTLE			7	1028.54	S2_FL_complex	0.167	1029.47	0.01973	0.247765	0.045084	6.11815	0.046591
S2 spike	575	583	AVRDPQTLE			7	1028.54	S2_FL_complex	1.667	1030.27	0.091991	1.04531	0.100527	6.14648	0.01653
S2 spike	575	583	AVRDPQTLE			7	1028.54	S2_FL_complex	16.667	1031.37	0.030958	2.14177	0.051007	6.15448	0.005926
S2 spike	575	583	AVRDPQTLE			7	1028.54	S2_FL_complex	166.667	1031.94	0.089115	2.71533	0.097902	6.11335	0.037502
S2 spike	627	633	DQLTPTW			5	860.415	S2_3A3Fab_complex	0	860.721	0.008145	0	0	7.83223	0.021188
S2 spike	627	633	DQLTPTW			5	860.415	S2_3A3Fab_complex	0.167	863.316	0.025387	2.5947	0.026661	7.86394	0.000882
S2 spike	627	633	DQLTPTW			5	860.415	S2_3A3Fab_complex	1.667	863.506	0.02431	2.78483	0.025638	7.85758	0.008808
S2 spike	627	633	DQLTPTW			5	860.415	S2_3A3Fab_complex	16.667	863.7	0.074142	2.979	0.074588	7.85753	0.001897
S2 spike	627	633	DQLTPTW			5	860.415	S2_3A3Fab_complex	166.667	863.911	0.066266	3.19007	0.066764	7.86014	0.009514
S2 spike	627	633	DQLTPTW			5	860.415	S2_Alone	0	860.721	0.008145	0	0	7.83223	0.021188
S2 spike	627	633	DQLTPTW			5	860.415	S2_Alone	0.167	863.301	0.052082	2.58033	0.052715	7.8437	0.022465
S2 spike	627	633	DQLTPTW			5	860.415	S2_Alone	1.667	863.479	0.068905	2.75855	0.069385	7.84755	0.026225
S2 spike	627	633	DQLTPTW			5	860.415	S2_Alone	16.667	863.719	0.050248	2.99795	0.050904	7.85956	0.008121
S2 spike	627	633	DQLTPTW			5	860.415	S2_Alone	166.667	863.896	0.056783	3.17492	0.057365	7.83773	0.024702
S2 spike	627	633	DQLTPTW			5	860.415	S2_FL_complex	0	860.721	0.008145	0	0	7.83223	0.021188
S2 spike	627	633	DQLTPTW			5	860.415	S2_FL_complex	0.167	863.252	0.034191	2.53117	0.035147	7.86122	0.009968
S2 spike	627	633	DQLTPTW			5	860.415	S2_FL_complex	1.667	863.471	0.043502	2.75061	0.044258	7.85654	0.010997
S2 spike	627	633	DQLTPTW			5	860.415	S2_FL_complex	16.667	863.762	0.063087	3.0413	0.063611	7.86154	3.7022e-05
S2 spike	627	633	DQLTPTW			5	860.415	S2_FL_complex	166.667	863.943	0	3.22248	0.008145	7.83671	0
S2 spike	634	642	RVYSTGSNV			8	982.495	S2_3A3Fab_complex	0	982.979	0.059171	0	0	5.82653	0.05531
S2 spike	634	642	RVYSTGSNV			8	982.495	S2_3A3Fab_complex	0.167	986.333	0.130069	3.35448	0.142895	5.90628	0.003931
S2 spike	634	642	RVYSTGSNV			8	982.495	S2_3A3Fab_complex	1.667	986.447	0.069824	3.46782	0.091524	5.90724	0.006849
S2 spike	634	642	RVYSTGSNV			8	982.495	S2_3A3Fab_complex	16.667	986.377	0.02095	3.39852	0.06277	5.86316	0.058598
S2 spike	634	642	RVYSTGSNV			8	982.495	S2_3A3Fab_complex	166.667	986.604	0.11797	3.6254	0.131978	5.91267	0.019031
S2 spike	634	642	RVYSTGSNV			8	982.495	S2_Alone	0	982.989	0.05503	0	0	5.83384	0.054499
S2 spike	634	642	RVYSTGSNV			8	982.495	S2_Alone	0.167	986.374	0.100426	3.38475	0.114515	5.85502	0.054304
S2 spike	634	642	RVYSTGSNV			8	982.495	S2_Alone	1.667	986.528	0.085391	3.53947	0.101587	5.86579	0.073731
S2 spike	634	642	RVYSTGSNV			8	982.495	S2_Alone	16.667	986.471	0.062174	3.48172	0.08303	5.89786	0.016038
S2 spike	634	642	RVYSTGSNV			8	982.495	S2_Alone	166.667	986.591	0.057012	3.60201	0.079238	5.82745	0.06551
S2 spike	634	642	RVYSTGSNV			8	982.495	S2_FL_complex	0	982.979	0.059171	0	0	5.82653	0.05531
S2 spike	634	642	RVYSTGSNV			8	982.495	S2_FL_complex	0.167	986.303	0.104382	3.32407	0.119986	5.88415	0.059966
S2 spike	634	642	RVYSTGSNV			8	982.495	S2_FL_complex	1.667	986.415	0.096206	3.43664	0.112946	5.90879	0.019315
S2 spike	634	642	RVYSTGSNV			8	982.495	S2_FL_complex	16.667	986.432	0.098492	3.4535	0.114899	5.86704	0.06819
S2 spike	634	642	RVYSTGSNV			8	982.495	S2_FL_complex	166.667	986.517	0.123495	3.53789	0.136939	5.86749	0.045907
S2 spike	634	643	RVYSTGSNVF			9	1129.56	S2_3A3Fab_complex	0	1130.15	0.036508	0	0	6.92868	0.036107
S2 spike	634	643	RVYSTGSNVF			9	1129.56	S2_3A3Fab_complex	0.167	1133.33	0.018065	3.17506	0.040733	6.97493	0.00158
S2 spike	634	643	RVYSTGSNVF			9	1129.56	S2_3A3Fab_complex	1.667	1133.63	0.098015	3.4783	0.104593	6.97748	0.006823
S2 spike	634	643	RVYSTGSNVF			9	1129.56	S2_3A3Fab_complex	16.667	1134.06	0.080017	3.91046	0.087952	6.94691	0.038564
S2 spike	634	643	RVYSTGSNVF			9	1129.56	S2_3A3Fab_complex	166.667	1134.16	0.059673	4.00263	0.069955	6.97673	0.011113
S2 spike	634	643	RVYSTGSNVF			9	1129.56	S2_Alone	0	1130.15	0.036508	0	0	6.92868	0.036107
S2 spike	634	643	RVYSTGSNVF			9	1129.56	S2_Alone	0.167	1133.44	0.091674	3.28541	0.098676	6.94845	0.035899
S2 spike	634	643	RVYSTGSNVF			9	1129.56	S2_Alone	1.667	1133.67	0.07013	3.51562	0.079063	6.95601	0.046304
S2 spike	634	643	RVYSTGSNVF			9	1129.56	S2_Alone	16.667	1134.15	0.115251	3.99469	0.120895	6.97867	0.012369
S2 spike	634	643	RVYSTGSNVF			9	1129.56	S2_Alone	166.667	1134.22	0.078138	4.06752	0.086246	6.93203	0.040594
S2 spike	634	643	RVYSTGSNVF			9	1129.56	S2_FL_complex	0	1130.15	0.036508	0	0	6.92868	0.036107
S2 spike	634	643	RVYSTGSNVF			9	1129.56	S2_FL_complex	0.167	1133.39	0.073255	3.23243	0.081848	6.95502	0.038154
S2 spike	634	643	RVYSTGSNVF			9	1129.56	S2_FL_complex	1.667	1133.69	0.067198	3.53946	0.076475	6.97138	0.01345
S2 spike	634	643	RVYSTGSNVF			9	1129.56	S2_FL_complex	16.667	1134.07	0.06956	3.92125	0.078558	6.94911	0.042898
S2 spike	634	643	RVYSTGSNVF			9	1129.56	S2_FL_complex	166.667	1134.22	0.105664	4.06796	0.111793	6.94361	0.025804
S2 spike	662	673	CDIPIGAGICAS			10	1119.52	S2_3A3Fab_complex	0	1120.16	0.016548	0	0	7.51116	0.029073
S2 spike	662	673	CDIPIGAGICAS			10	1119.52	S2_3A3Fab_complex	0.167	1120.85	0.080236	0.697148	0.081924	7.5438	0.003449
S2 spike	662	673	CDIPIGAGICAS			10	1119.52	S2_3A3Fab_complex	1.667	1121.03	0.057408	0.872854	0.059745	7.53463	0.010292
S2 spike	662	673	CDIPIGAGICAS			10	1119.52	S2_3A3Fab_complex	16.667	1121.23	0.047612	1.07217	0.050406	7.51602	0.027334
S2 spike	662	673	CDIPIGAGICAS			10	1119.52	S2_3A3Fab_complex	166.667	1121.52	0.19499	1.35753	0.195691	7.53725	0.016557
S2 spike	662	673	CDIPIGAGICAS			10	1119.52	S2_Alone	0	1120.16	0.016548	0	0	7.51116	0.029073
S2 spike	662	673	CDIPIGAGICAS			10	1119.52	S2_Alone	0.167	1120.92	0.075615	0.76035	0.077405	7.51527	0.024301
S2 spike	662	673	CDIPIGAGICAS			10	1119.52	S2_Alone	1.667	1120.96	0.162761	0.805564	0.1636	7.52411	0.033103
S2 spike	662	673	CDIPIGAGICAS			10	1119.52	S2_Alone	16.667	1121.21	0.065881	1.05627	0.067927	7.53647	0.012598
S2 spike	662	673	CDIPIGAGICAS			10	1119.52	S2_Alone	166.667	1121.55	0.197951	1.39493	0.198641	7.50772	0.030931
S2 spike	662	673	CDIPIGAGICAS			10	1119.52	S2_FL_complex	0	1120.16	0.016548	0	0	7.51116	0.029073
S2 spike	662	673	CDIPIGAGICAS			10	1119.52	S2_FL_complex	0.167	1120.91	0.06204	0.757349	0.064209	7.5307	0.028055
S2 spike	662	673	CDIPIGAGICAS			10	1119.52	S2_FL_complex	1.667	1120.94	0.051661	0.782993	0.054247	7.53261	0.016127
S2 spike	662	673	CDIPIGAGICAS			10	1119.52	S2_FL_complex	16.667	1121.17	0.127457	1.01205	0.128527	7.52275	0.03115
S2 spike	662	673	CDIPIGAGICAS			10	1119.52	S2_FL_complex	166.667	1121.61	0.192304	1.44814	0.193015	7.50617	0.014494
S2 spike	664	671	IPIGAGIC			6	743.412	S2_3A3Fab_complex	0	743.786	0.054009	0	0	7.44982	0.026739
S2 spike	664	671	IPIGAGIC			6	743.412	S2_3A3Fab_complex	0.167	744.325	0.012136	0.538464	0.055356	7.47226	0.004311
S2 spike	664	671	IPIGAGIC			6	743.412	S2_3A3Fab_complex	1.667	744.525	0.102002	0.738952	0.115418	7.4703	0.009805
S2 spike	664	671	IPIGAGIC			6	743.412	S2_3A3Fab_complex	16.667	744.833	0.080847	1.04702	0.097228	7.45037	0.028653
S2 spike	664	671	IPIGAGIC			6	743.412	S2_3A3Fab_complex	166.667	745.112	0.097989	1.32571	0.111888	7.47042	0.012672
S2 spike	664	671	IPIGAGIC			6	743.412	S2_Alone	0	743.788	0.069983	0	0	7.45008	0.027359
S2 spike	664	671	IPIGAGIC			6	743.412	S2_Alone	0.167	744.364	0.063568	0.575092	0.094544	7.45066	0.025375
S2 spike	664	671	IPIGAGIC			6	743.412	S2_Alone	1.667	744.517	0.060926	0.728487	0.092788	7.45561	0.032191
S2 spike	664	671	IPIGAGIC			6	743.412	S2_Alone	16.667	744.829	0.048748	1.04039	0.085288	7.47001	0.007592
S2 spike	664	671	IPIGAGIC			6	743.412	S2_Alone	166.667	745.137	0.102997	1.34878	0.124523	7.43903	0.03249
S2 spike	664	671	IPIGAGIC			6	743.412	S2_FL_complex	0	743.786	0.054009	0	0	7.44982	0.026739
S2 spike	664	671	IPIGAGIC			6	743.412	S2_FL_complex	0.167	744.374	0.046983	0.587879	0.071585	7.46225	0.027216
S2 spike	664	671	IPIGAGIC			6	743.412	S2_FL_complex	1.667	744.571	0.06948	0.784612	0.088003	7.46809	0.009801
S2 spike	664	671	IPIGAGIC			6	743.412	S2_FL_complex	16.667	744.841	0.100014	1.05488	0.113665	7.45337	0.028702
S2 spike	664	671	IPIGAGIC			6	743.412	S2_FL_complex	166.667	745.085	0.075628	1.29819	0.092934	7.44364	0.01957
S2 spike	668	692	AGICASYQTQTNSPGSASSVASQSI			23	2415.11	S2_3A3Fab_complex	0	2416.4	0.03657	0	0	6.60968	0.042119
S2 spike	668	692	AGICASYQTQTNSPGSASSVASQSI			23	2415.11	S2_3A3Fab_complex	0.167	2423.59	0.085676	7.18102	0.093155	6.66837	0.000818
S2 spike	668	692	AGICASYQTQTNSPGSASSVASQSI			23	2415.11	S2_3A3Fab_complex	1.667	2424.83	0.21427	8.42565	0.217368	6.66649	0.010503
S2 spike	668	692	AGICASYQTQTNSPGSASSVASQSI			23	2415.11	S2_3A3Fab_complex	16.667	2426.16	0.186583	9.75651	0.190133	6.61664	0.043681
S2 spike	668	692	AGICASYQTQTNSPGSASSVASQSI			23	2415.11	S2_3A3Fab_complex	166.667	2426.47	0.194764	10.0697	0.198168	6.66219	0.009835
S2 spike	668	692	AGICASYQTQTNSPGSASSVASQSI			23	2415.11	S2_Alone	0	2416.4	0.03657	0	0	6.60968	0.042119
S2 spike	668	692	AGICASYQTQTNSPGSASSVASQSI			23	2415.11	S2_Alone	0.167	2423.48	0.106608	7.07468	0.112706	6.62561	0.040646
S2 spike	668	692	AGICASYQTQTNSPGSASSVASQSI			23	2415.11	S2_Alone	1.667	2424.86	0.28763	8.45361	0.289946	6.6329	0.052114
S2 spike	668	692	AGICASYQTQTNSPGSASSVASQSI			23	2415.11	S2_Alone	16.667	2425.89	0.099749	9.48677	0.106241	6.66458	0.011715
S2 spike	668	692	AGICASYQTQTNSPGSASSVASQSI			23	2415.11	S2_Alone	166.667	2426.73	0.335103	10.325	0.337093	6.60689	0.041867
S2 spike	668	692	AGICASYQTQTNSPGSASSVASQSI			23	2415.11	S2_FL_complex	0	2416.4	0.03657	0	0	6.60968	0.042119
S2 spike	668	692	AGICASYQTQTNSPGSASSVASQSI			23	2415.11	S2_FL_complex	0.167	2423.33	0.211387	6.92966	0.214527	6.65971	0.048253
S2 spike	668	692	AGICASYQTQTNSPGSASSVASQSI			23	2415.11	S2_FL_complex	1.667	2424.76	0.337774	8.35307	0.339747	6.6614	0.01946
S2 spike	668	692	AGICASYQTQTNSPGSASSVASQSI			23	2415.11	S2_FL_complex	16.667	2426.02	0.300417	9.61523	0.302635	6.63336	0.04367
S2 spike	668	692	AGICASYQTQTNSPGSASSVASQSI			23	2415.11	S2_FL_complex	166.667	2426.56	0.343072	10.1541	0.345016	6.63153	0.028895
S2 spike	672	694	ASYQTQTNSPGSASSVASQSIIA			21	2255.08	S2_3A3Fab_complex	0	2256.29	0.022472	0	0	6.96004	0.033707
S2 spike	672	694	ASYQTQTNSPGSASSVASQSIIA			21	2255.08	S2_3A3Fab_complex	0.167	2267.42	0.096437	11.1338	0.09902	6.98595	0.00308
S2 spike	672	694	ASYQTQTNSPGSASSVASQSIIA			21	2255.08	S2_3A3Fab_complex	1.667	2268.07	0.223406	11.7833	0.224534	6.98839	0.011491
S2 spike	672	694	ASYQTQTNSPGSASSVASQSIIA			21	2255.08	S2_3A3Fab_complex	16.667	2267.91	0.350472	11.6216	0.351192	6.97104	0.02868
S2 spike	672	694	ASYQTQTNSPGSASSVASQSIIA			21	2255.08	S2_3A3Fab_complex	166.667	2268.15	0.18943	11.8593	0.190758	6.98467	0.010712
S2 spike	672	694	ASYQTQTNSPGSASSVASQSIIA			21	2255.08	S2_Alone	0	2256.29	0.022472	0	0	6.96004	0.033707
S2 spike	672	694	ASYQTQTNSPGSASSVASQSIIA			21	2255.08	S2_Alone	0.167	2267.37	0.229688	11.0809	0.230784	6.96712	0.0291
S2 spike	672	694	ASYQTQTNSPGSASSVASQSIIA			21	2255.08	S2_Alone	1.667	2267.8	0.125048	11.5075	0.127051	6.97356	0.043088
S2 spike	672	694	ASYQTQTNSPGSASSVASQSIIA			21	2255.08	S2_Alone	16.667	2267.67	0.055348	11.3857	0.059736	6.99231	0.011058
S2 spike	672	694	ASYQTQTNSPGSASSVASQSIIA			21	2255.08	S2_Alone	166.667	2268.01	0.309215	11.7184	0.31003	6.94825	0.036267
S2 spike	672	694	ASYQTQTNSPGSASSVASQSIIA			21	2255.08	S2_FL_complex	0	2256.29	0.022472	0	0	6.96004	0.033707
S2 spike	672	694	ASYQTQTNSPGSASSVASQSIIA			21	2255.08	S2_FL_complex	0.167	2267.2	0.239772	10.9164	0.240823	6.96398	0.037979
S2 spike	672	694	ASYQTQTNSPGSASSVASQSIIA			21	2255.08	S2_FL_complex	1.667	2267.93	0.246765	11.6451	0.247786	6.97324	0.013768
S2 spike	672	694	ASYQTQTNSPGSASSVASQSIIA			21	2255.08	S2_FL_complex	16.667	2267.81	0.238508	11.5201	0.239565	6.96192	0.044559
S2 spike	672	694	ASYQTQTNSPGSASSVASQSIIA			21	2255.08	S2_FL_complex	166.667	2268.06	0.300612	11.7726	0.301451	6.95071	0.017885
S2 spike	675	690	QTQTNSPGSASSVASQ			14	1549.71	S2_3A3Fab_complex	0	1550.57	0.054633	0	0	5.68879	0.057214
S2 spike	675	690	QTQTNSPGSASSVASQ			14	1549.71	S2_3A3Fab_complex	0.167	1557.51	0.092199	6.94298	0.10717	5.7556	0.002694
S2 spike	675	690	QTQTNSPGSASSVASQ			14	1549.71	S2_3A3Fab_complex	1.667	1557.51	0.04437	6.93719	0.070381	5.76119	0.009117
S2 spike	675	690	QTQTNSPGSASSVASQ			14	1549.71	S2_3A3Fab_complex	16.667	1557.58	0.096866	7.0099	0.111211	5.71554	0.065151
S2 spike	675	690	QTQTNSPGSASSVASQ			14	1549.71	S2_3A3Fab_complex	166.667	1557.54	0.142726	6.97244	0.152825	5.76647	0.015965
S2 spike	675	690	QTQTNSPGSASSVASQ			14	1549.71	S2_Alone	0	1550.57	0.054633	0	0	5.68879	0.057214
S2 spike	675	690	QTQTNSPGSASSVASQ			14	1549.71	S2_Alone	0.167	1557.63	0.172336	7.05611	0.180788	5.71642	0.052644
S2 spike	675	690	QTQTNSPGSASSVASQ			14	1549.71	S2_Alone	1.667	1557.68	0.073983	7.10518	0.091969	5.7252	0.077719
S2 spike	675	690	QTQTNSPGSASSVASQ			14	1549.71	S2_Alone	16.667	1557.51	0.078628	6.93669	0.095746	5.76095	0.018063
S2 spike	675	690	QTQTNSPGSASSVASQ			14	1549.71	S2_Alone	166.667	1557.66	0.119636	7.0861	0.13152	5.68366	0.068657
S2 spike	675	690	QTQTNSPGSASSVASQ			14	1549.71	S2_FL_complex	0	1550.57	0.054633	0	0	5.68879	0.057214
S2 spike	675	690	QTQTNSPGSASSVASQ			14	1549.71	S2_FL_complex	0.167	1557.53	0.184538	6.95359	0.192455	5.72143	0.066078
S2 spike	675	690	QTQTNSPGSASSVASQ			14	1549.71	S2_FL_complex	1.667	1557.59	0.112072	7.02008	0.124679	5.75278	0.020463
S2 spike	675	690	QTQTNSPGSASSVASQ			14	1549.71	S2_FL_complex	16.667	1557.49	0.164837	6.91472	0.173655	5.71813	0.065905
S2 spike	675	690	QTQTNSPGSASSVASQ			14	1549.71	S2_FL_complex	166.667	1557.45	0.164553	6.87479	0.173386	5.70629	0.050131
S2 spike	675	694	QTQTNSPGSASSVASQSIIA			18	1933.95	S2_3A3Fab_complex	0	1934.96	0.013708	0	0	6.87797	0.038782
S2 spike	675	694	QTQTNSPGSASSVASQSIIA			18	1933.95	S2_3A3Fab_complex	0.167	1943.36	0.182351	8.39878	0.182865	6.91134	0.003211
S2 spike	675	694	QTQTNSPGSASSVASQSIIA			18	1933.95	S2_3A3Fab_complex	1.667	1943.65	0.113578	8.6928	0.114403	6.91446	0.006317
S2 spike	675	694	QTQTNSPGSASSVASQSIIA			18	1933.95	S2_3A3Fab_complex	16.667	1943.79	0.127234	8.82708	0.12797	6.88684	0.039285
S2 spike	675	694	QTQTNSPGSASSVASQSIIA			18	1933.95	S2_3A3Fab_complex	166.667	1943.77	0.134367	8.80907	0.135064	6.91709	0.010668
S2 spike	675	694	QTQTNSPGSASSVASQSIIA			18	1933.95	S2_Alone	0	1934.96	0.013708	0	0	6.87797	0.038782
S2 spike	675	694	QTQTNSPGSASSVASQSIIA			18	1933.95	S2_Alone	0.167	1943.39	0.220193	8.42878	0.220619	6.88243	0.03633
S2 spike	675	694	QTQTNSPGSASSVASQSIIA			18	1933.95	S2_Alone	1.667	1943.73	0.118907	8.76851	0.119694	6.8792	0.046711
S2 spike	675	694	QTQTNSPGSASSVASQSIIA			18	1933.95	S2_Alone	16.667	1943.8	0.054651	8.83704	0.056344	6.91314	0.013246
S2 spike	675	694	QTQTNSPGSASSVASQSIIA			18	1933.95	S2_Alone	166.667	1943.99	0.259871	9.02702	0.260233	6.87064	0.045067
S2 spike	675	694	QTQTNSPGSASSVASQSIIA			18	1933.95	S2_FL_complex	0	1934.94	0.059758	0	0	6.87823	0.038837
S2 spike	675	694	QTQTNSPGSASSVASQSIIA			18	1933.95	S2_FL_complex	0.167	1943.18	0.061344	8.24064	0.08564	6.87858	0.034365
S2 spike	675	694	QTQTNSPGSASSVASQSIIA			18	1933.95	S2_FL_complex	1.667	1943.79	0.323908	8.84198	0.329374	6.912	0.016323
S2 spike	675	694	QTQTNSPGSASSVASQSIIA			18	1933.95	S2_FL_complex	16.667	1943.92	0.164576	8.97849	0.175089	6.87483	0.046224
S2 spike	675	694	QTQTNSPGSASSVASQSIIA			18	1933.95	S2_FL_complex	166.667	1943.74	0.107732	8.79671	0.123195	6.87746	0.028647
S2 spike	693	699	IAYTMSL			6	798.407	S2_3A3Fab_complex	0	798.828	0.010245	0	0	7.82363	0.021797
S2 spike	693	699	IAYTMSL			6	798.407	S2_3A3Fab_complex	0.167	800.161	0.038437	1.33301	0.039779	7.84889	0.00258
S2 spike	693	699	IAYTMSL			6	798.407	S2_3A3Fab_complex	1.667	801.077	0.089625	2.24949	0.090208	7.84176	0.008098
S2 spike	693	699	IAYTMSL			6	798.407	S2_3A3Fab_complex	16.667	801.24	0.013289	2.41231	0.01678	7.83008	0.021128
S2 spike	693	699	IAYTMSL			6	798.407	S2_3A3Fab_complex	166.667	801.292	0.045958	2.46427	0.047086	7.84592	0.010596
S2 spike	693	699	IAYTMSL			6	798.407	S2_Alone	0	798.828	0.010245	0	0	7.82363	0.021797
S2 spike	693	699	IAYTMSL			6	798.407	S2_Alone	0.167	800.157	0.081368	1.32898	0.082011	7.83087	0.019233
S2 spike	693	699	IAYTMSL			6	798.407	S2_Alone	1.667	801.041	0.056335	2.21351	0.057259	7.83451	0.024193
S2 spike	693	699	IAYTMSL			6	798.407	S2_Alone	16.667	801.243	0.032641	2.41556	0.034211	7.84531	0.007289
S2 spike	693	699	IAYTMSL			6	798.407	S2_Alone	166.667	801.322	0.034034	2.49387	0.035543	7.82476	0.024523
S2 spike	693	699	IAYTMSL			6	798.407	S2_FL_complex	0	798.828	0.010245	0	0	7.82363	0.021797
S2 spike	693	699	IAYTMSL			6	798.407	S2_FL_complex	0.167	800.192	0.021304	1.36392	0.02364	7.83649	0.022021
S2 spike	693	699	IAYTMSL			6	798.407	S2_FL_complex	1.667	801.008	0.051999	2.17963	0.052998	7.84131	0.011159
S2 spike	693	699	IAYTMSL			6	798.407	S2_FL_complex	16.667	801.276	0.035091	2.44845	0.036556	7.83263	0.023096
S2 spike	693	699	IAYTMSL			6	798.407	S2_FL_complex	166.667	801.354	0.057639	2.52589	0.058543	7.82332	0.011355
S2 spike	695	706	YTMSLGAENSVA			11	1242.57	S2_3A3Fab_complex	0	1243.21	0.047521	0	0	7.23218	0.032435
S2 spike	695	706	YTMSLGAENSVA			11	1242.57	S2_3A3Fab_complex	0.167	1248.16	0.004959	4.9516	0.047779	7.26294	0.00476
S2 spike	695	706	YTMSLGAENSVA			11	1242.57	S2_3A3Fab_complex	1.667	1248.56	0.070533	5.342	0.085048	7.26131	0.015239
S2 spike	695	706	YTMSLGAENSVA			11	1242.57	S2_3A3Fab_complex	166.667	1248.64	0	5.42307	0.047521	7.26406	0
S2 spike	695	706	YTMSLGAENSVA			11	1242.57	S2_Alone	0	1243.21	0.047521	0	0	7.23218	0.032435
S2 spike	695	706	YTMSLGAENSVA			11	1242.57	S2_Alone	0.167	1248.06	0.028334	4.84923	0.055327	7.24136	0.032284
S2 spike	695	706	YTMSLGAENSVA			11	1242.57	S2_Alone	1.667	1248.43	0	5.21612	0.047521	7.2872	0
S2 spike	695	706	YTMSLGAENSVA			11	1242.57	S2_Alone	16.667	1248.5	0.10108	5.28249	0.111693	7.2778	0.007495
S2 spike	695	706	YTMSLGAENSVA			11	1242.57	S2_Alone	166.667	1248.59	0	5.37957	0.047521	7.28514	0
S2 spike	695	706	YTMSLGAENSVA			11	1242.57	S2_FL_complex	0	1243.21	0.047521	0	0	7.23218	0.032435
S2 spike	695	706	YTMSLGAENSVA			11	1242.57	S2_FL_complex	0.167	1248.11	0.025919	4.8967	0.05413	7.26681	0.011969
S2 spike	695	706	YTMSLGAENSVA			11	1242.57	S2_FL_complex	1.667	1248.5	0.083577	5.28553	0.096143	7.26136	0.012946
S2 spike	695	706	YTMSLGAENSVA			11	1242.57	S2_FL_complex	16.667	1248.58	0.11308	5.36617	0.12266	7.24194	0.031218
S2 spike	695	706	YTMSLGAENSVA			11	1242.57	S2_FL_complex	166.667	1248.54	0.140429	5.3249	0.148251	7.24317	0.016159
S2 spike	700	706	GAENSVA			6	647.299	S2_3A3Fab_complex	0	647.585	0.004121	0	0	5.63513	0.060829
S2 spike	700	706	GAENSVA			6	647.299	S2_3A3Fab_complex	0.167	650.229	0.043225	2.64445	0.043421	5.70389	0.002435
S2 spike	700	706	GAENSVA			6	647.299	S2_3A3Fab_complex	1.667	650.339	0.02047	2.75408	0.02088	5.70909	0.009236
S2 spike	700	706	GAENSVA			6	647.299	S2_3A3Fab_complex	16.667	650.3	0.032592	2.71491	0.032852	5.66844	0.066343
S2 spike	700	706	GAENSVA			6	647.299	S2_3A3Fab_complex	166.667	650.341	0.037887	2.75616	0.038111	5.7174	0.017964
S2 spike	700	706	GAENSVA			6	647.299	S2_Alone	0	647.585	0.004121	0	0	5.63513	0.060829
S2 spike	700	706	GAENSVA			6	647.299	S2_Alone	0.167	650.242	0.044954	2.65769	0.045143	5.66902	0.054273
S2 spike	700	706	GAENSVA			6	647.299	S2_Alone	1.667	650.308	0.080141	2.72317	0.080247	5.68083	0.079026
S2 spike	700	706	GAENSVA			6	647.299	S2_Alone	16.667	650.261	0.034528	2.67621	0.034773	5.71223	0.018376
S2 spike	700	706	GAENSVA			6	647.299	S2_Alone	166.667	650.315	0.067777	2.73049	0.067902	5.63843	0.073562
S2 spike	700	706	GAENSVA			6	647.299	S2_FL_complex	0	647.585	0.004121	0	0	5.63513	0.060829
S2 spike	700	706	GAENSVA			6	647.299	S2_FL_complex	0.167	650.247	0.053178	2.6623	0.053337	5.67884	0.068577
S2 spike	700	706	GAENSVA			6	647.299	S2_FL_complex	1.667	650.354	0.081949	2.76879	0.082053	5.70916	0.022913
S2 spike	700	706	GAENSVA			6	647.299	S2_FL_complex	16.667	650.306	0.065693	2.72118	0.065822	5.6719	0.07099
S2 spike	700	706	GAENSVA			6	647.299	S2_FL_complex	166.667	650.294	0.093953	2.70888	0.094044	5.6611	0.051247
S2 spike	724	731	TEILPVSM			6	889.47	S2_3A3Fab_complex	0	890.186	0.056124	0	0	7.69472	0.022327
S2 spike	724	731	TEILPVSM			6	889.47	S2_3A3Fab_complex	0.167	890.85	0.011194	0.664441	0.057229	7.72458	0.001124
S2 spike	724	731	TEILPVSM			6	889.47	S2_3A3Fab_complex	1.667	890.951	0.020798	0.765072	0.059853	7.72102	0.008845
S2 spike	724	731	TEILPVSM			6	889.47	S2_3A3Fab_complex	16.667	890.941	0.024106	0.755221	0.061082	7.70277	0.021758
S2 spike	724	731	TEILPVSM			6	889.47	S2_3A3Fab_complex	166.667	890.956	0.025447	0.769932	0.061623	7.72047	0.010685
S2 spike	724	731	TEILPVSM			6	889.47	S2_Alone	0	890.186	0.056124	0	0	7.69472	0.022327
S2 spike	724	731	TEILPVSM			6	889.47	S2_Alone	0.167	890.869	0.031847	0.682682	0.06453	7.70053	0.019871
S2 spike	724	731	TEILPVSM			6	889.47	S2_Alone	1.667	890.952	0.040939	0.765915	0.069469	7.70822	0.026169
S2 spike	724	731	TEILPVSM			6	889.47	S2_Alone	16.667	890.96	0.035115	0.77393	0.066204	7.72534	0.008085
S2 spike	724	731	TEILPVSM			6	889.47	S2_Alone	166.667	890.991	0.03746	0.804866	0.067477	7.69697	0.024946
S2 spike	724	731	TEILPVSM			6	889.47	S2_FL_complex	0	890.186	0.056124	0	0	7.69472	0.022327
S2 spike	724	731	TEILPVSM			6	889.47	S2_FL_complex	0.167	890.856	0.008703	0.66984	0.056794	7.71222	0.02319
S2 spike	724	731	TEILPVSM			6	889.47	S2_FL_complex	1.667	890.909	0.026743	0.723272	0.06217	7.71928	0.01353
S2 spike	724	731	TEILPVSM			6	889.47	S2_FL_complex	16.667	890.931	0.020464	0.744609	0.059738	7.70278	0.025425
S2 spike	724	731	TEILPVSM			6	889.47	S2_FL_complex	166.667	890.961	0.019221	0.774962	0.059324	7.69289	0.007863
S2 spike	724	732	TEILPVSMT			7	990.518	S2_3A3Fab_complex	0	991.351	0.079798	0	0	7.51001	0.027808
S2 spike	724	732	TEILPVSMT			7	990.518	S2_3A3Fab_complex	0.167	992.66	0.025941	1.30976	0.083908	7.54386	0.001433
S2 spike	724	732	TEILPVSMT			7	990.518	S2_3A3Fab_complex	1.667	992.791	0.033826	1.44044	0.086671	7.53677	0.00542
S2 spike	724	732	TEILPVSMT			7	990.518	S2_3A3Fab_complex	16.667	992.875	0.029481	1.52392	0.085069	7.5171	0.026429
S2 spike	724	732	TEILPVSMT			7	990.518	S2_3A3Fab_complex	166.667	992.921	0.05559	1.57018	0.097252	7.54003	0.012558
S2 spike	724	732	TEILPVSMT			7	990.518	S2_Alone	0	991.351	0.079798	0	0	7.51001	0.027808
S2 spike	724	732	TEILPVSMT			7	990.518	S2_Alone	0.167	992.654	0.029153	1.30319	0.084956	7.51578	0.025259
S2 spike	724	732	TEILPVSMT			7	990.518	S2_Alone	1.667	992.824	0.023528	1.47303	0.083194	7.52485	0.034784
S2 spike	724	732	TEILPVSMT			7	990.518	S2_Alone	16.667	992.853	0.023721	1.50239	0.083249	7.54115	0.009109
S2 spike	724	732	TEILPVSMT			7	990.518	S2_Alone	166.667	992.971	0.059688	1.62027	0.099651	7.50959	0.033526
S2 spike	724	732	TEILPVSMT			7	990.518	S2_FL_complex	0	991.351	0.079798	0	0	7.51001	0.027808
S2 spike	724	732	TEILPVSMT			7	990.518	S2_FL_complex	0.167	992.694	0.018178	1.34381	0.081842	7.52832	0.029889
S2 spike	724	732	TEILPVSMT			7	990.518	S2_FL_complex	1.667	992.816	0.021008	1.46488	0.082517	7.53635	0.018434
S2 spike	724	732	TEILPVSMT			7	990.518	S2_FL_complex	16.667	992.886	0.023889	1.5355	0.083297	7.52151	0.030664
S2 spike	724	732	TEILPVSMT			7	990.518	S2_FL_complex	166.667	992.936	0.063158	1.58494	0.101767	7.51171	0.015426
S2 spike	724	737	TEILPVSMTKTSVD			12	1520.79	S2_3A3Fab_complex	0	1521.9	0.062682	0	0	6.9528	0.034294
S2 spike	724	737	TEILPVSMTKTSVD			12	1520.79	S2_3A3Fab_complex	0.167	1522.18	0.009846	0.270771	0.063451	6.97209	0.003763
S2 spike	724	737	TEILPVSMTKTSVD			12	1520.79	S2_3A3Fab_complex	1.667	1522.45	0.033738	0.546761	0.071185	6.97613	0.008047
S2 spike	724	737	TEILPVSMTKTSVD			12	1520.79	S2_3A3Fab_complex	16.667	1522.93	0.078401	1.02885	0.100378	6.94306	0.039296
S2 spike	724	737	TEILPVSMTKTSVD			12	1520.79	S2_3A3Fab_complex	166.667	1523.98	0.075141	2.07282	0.097853	6.97271	0.008751
S2 spike	724	737	TEILPVSMTKTSVD			12	1520.79	S2_Alone	0	1521.9	0.062682	0	0	6.9528	0.034294
S2 spike	724	737	TEILPVSMTKTSVD			12	1520.79	S2_Alone	0.167	1522.29	0.075787	0.390087	0.09835	6.94521	0.032926
S2 spike	724	737	TEILPVSMTKTSVD			12	1520.79	S2_Alone	1.667	1522.44	0.051348	0.530593	0.081029	6.95425	0.045134
S2 spike	724	737	TEILPVSMTKTSVD			12	1520.79	S2_Alone	16.667	1523.03	0.060674	1.12971	0.087238	6.97133	0.011138
S2 spike	724	737	TEILPVSMTKTSVD			12	1520.79	S2_Alone	166.667	1524.04	0.126774	2.13827	0.141424	6.9279	0.041088
S2 spike	724	737	TEILPVSMTKTSVD			12	1520.79	S2_FL_complex	0	1521.9	0.062682	0	0	6.9528	0.034294
S2 spike	724	737	TEILPVSMTKTSVD			12	1520.79	S2_FL_complex	0.167	1522.21	0.037653	0.305181	0.073122	6.95522	0.037497
S2 spike	724	737	TEILPVSMTKTSVD			12	1520.79	S2_FL_complex	1.667	1522.35	0.064164	0.447509	0.0897	6.96835	0.01274
S2 spike	724	737	TEILPVSMTKTSVD			12	1520.79	S2_FL_complex	16.667	1522.92	0.16867	1.01891	0.17994	6.94886	0.042606
S2 spike	724	737	TEILPVSMTKTSVD			12	1520.79	S2_FL_complex	166.667	1523.96	0.136744	2.05521	0.150426	6.94095	0.026046
S2 spike	725	731	EILPVSM			5	788.422	S2_3A3Fab_complex	0	788.897	0.0222	0	0	7.68934	0.022003
S2 spike	725	731	EILPVSM			5	788.422	S2_3A3Fab_complex	0.167	788.981	0.006999	0.08421	0.023277	7.71756	0.002236
S2 spike	725	731	EILPVSM			5	788.422	S2_3A3Fab_complex	1.667	788.995	0.003281	0.097787	0.022441	7.72049	0.002708
S2 spike	725	731	EILPVSM			5	788.422	S2_3A3Fab_complex	16.667	788.986	0.01305	0.088881	0.025752	7.69963	0.020655
S2 spike	725	731	EILPVSM			5	788.422	S2_3A3Fab_complex	166.667	789.006	0.027572	0.109287	0.035399	7.71624	0.013402
S2 spike	725	731	EILPVSM			5	788.422	S2_Alone	0	788.897	0.0222	0	0	7.68934	0.022003
S2 spike	725	731	EILPVSM			5	788.422	S2_Alone	0.167	789.007	0.014617	0.110177	0.02658	7.69676	0.020923
S2 spike	725	731	EILPVSM			5	788.422	S2_Alone	1.667	789.008	0.015087	0.110995	0.026841	7.70264	0.026682
S2 spike	725	731	EILPVSM			5	788.422	S2_Alone	16.667	789.017	0.016859	0.120048	0.027876	7.71587	0.008346
S2 spike	725	731	EILPVSM			5	788.422	S2_Alone	166.667	789.02	0.013432	0.122447	0.025947	7.69208	0.026279
S2 spike	725	731	EILPVSM			5	788.422	S2_FL_complex	0	788.897	0.0222	0	0	7.68934	0.022003
S2 spike	725	731	EILPVSM			5	788.422	S2_FL_complex	0.167	788.967	0.037397	0.070206	0.04349	7.70693	0.024773
S2 spike	725	731	EILPVSM			5	788.422	S2_FL_complex	1.667	788.977	0.018421	0.079445	0.028847	7.7133	0.012597
S2 spike	725	731	EILPVSM			5	788.422	S2_FL_complex	16.667	788.968	0.024506	0.071281	0.033066	7.6983	0.027829
S2 spike	725	731	EILPVSM			5	788.422	S2_FL_complex	166.667	789.035	0.013922	0.137952	0.026204	7.69375	0.01471
S2 spike	753	759	LLQYGSF			6	827.43	S2_3A3Fab_complex	0	828.062	0.039699	0	0	7.90517	0.017913
S2 spike	753	759	LLQYGSF			6	827.43	S2_3A3Fab_complex	0.167	829.948	0.079248	1.88641	0.088635	7.9286	0.002717
S2 spike	753	759	LLQYGSF			6	827.43	S2_3A3Fab_complex	1.667	830.462	0.034181	2.40019	0.052386	7.92613	0.010285
S2 spike	753	759	LLQYGSF			6	827.43	S2_3A3Fab_complex	16.667	830.747	0.037063	2.68493	0.054311	7.90914	0.016605
S2 spike	753	759	LLQYGSF			6	827.43	S2_3A3Fab_complex	166.667	830.961	0.068673	2.89905	0.079322	7.92244	0.01211
S2 spike	753	759	LLQYGSF			6	827.43	S2_Alone	0	828.062	0.039699	0	0	7.90517	0.017913
S2 spike	753	759	LLQYGSF			6	827.43	S2_Alone	0.167	829.889	0.031713	1.82696	0.05081	7.90662	0.018284
S2 spike	753	759	LLQYGSF			6	827.43	S2_Alone	1.667	830.42	0.040056	2.35842	0.056395	7.91368	0.022062
S2 spike	753	759	LLQYGSF			6	827.43	S2_Alone	16.667	830.717	0.048713	2.65546	0.06284	7.92566	0.007616
S2 spike	753	759	LLQYGSF			6	827.43	S2_Alone	166.667	830.932	0.066662	2.87063	0.077588	7.90418	0.022876
S2 spike	753	759	LLQYGSF			6	827.43	S2_FL_complex	0	828.062	0.039699	0	0	7.90517	0.017913
S2 spike	753	759	LLQYGSF			6	827.43	S2_FL_complex	0.167	829.924	0.069793	1.8617	0.080294	7.91596	0.019698
S2 spike	753	759	LLQYGSF			6	827.43	S2_FL_complex	1.667	830.437	0.047119	2.37516	0.061613	7.92101	0.010707
S2 spike	753	759	LLQYGSF			6	827.43	S2_FL_complex	16.667	830.702	0.073646	2.63984	0.083664	7.91172	0.022708
S2 spike	753	759	LLQYGSF			6	827.43	S2_FL_complex	166.667	830.92	0.053516	2.85849	0.066633	7.90341	0.011463
S2 spike	764	773	NRALTGIAVE			9	1043.58	S2_3A3Fab_complex	0	1044.1	0.027342	0	0	6.63229	0.041615
S2 spike	764	773	NRALTGIAVE			9	1043.58	S2_3A3Fab_complex	0.167	1044.45	0.028926	0.350315	0.039803	6.68928	0.001963
S2 spike	764	773	NRALTGIAVE			9	1043.58	S2_3A3Fab_complex	1.667	1045	0.038853	0.895584	0.047509	6.68791	0.007195
S2 spike	764	773	NRALTGIAVE			9	1043.58	S2_3A3Fab_complex	16.667	1046.24	0.030201	2.13289	0.040739	6.64697	0.046774
S2 spike	764	773	NRALTGIAVE			9	1043.58	S2_3A3Fab_complex	166.667	1047.95	0.053471	3.8458	0.060056	6.68737	0.0134
S2 spike	764	773	NRALTGIAVE			9	1043.58	S2_Alone	0	1044.1	0.027342	0	0	6.63229	0.041615
S2 spike	764	773	NRALTGIAVE			9	1043.58	S2_Alone	0.167	1044.5	0.063842	0.401428	0.069451	6.64599	0.041733
S2 spike	764	773	NRALTGIAVE			9	1043.58	S2_Alone	1.667	1044.96	0.084853	0.857241	0.089149	6.65182	0.056208
S2 spike	764	773	NRALTGIAVE			9	1043.58	S2_Alone	16.667	1046.2	0.038448	2.10008	0.047179	6.68677	0.013795
S2 spike	764	773	NRALTGIAVE			9	1043.58	S2_Alone	166.667	1048	0.132666	3.8976	0.135454	6.62333	0.042357
S2 spike	764	773	NRALTGIAVE			9	1043.58	S2_FL_complex	0	1044.1	0.027342	0	0	6.63229	0.041615
S2 spike	764	773	NRALTGIAVE			9	1043.58	S2_FL_complex	0.167	1044.49	0.062863	0.39188	0.068552	6.66718	0.043898
S2 spike	764	773	NRALTGIAVE			9	1043.58	S2_FL_complex	1.667	1044.93	0.076004	0.822631	0.080772	6.68464	0.015141
S2 spike	764	773	NRALTGIAVE			9	1043.58	S2_FL_complex	16.667	1046.19	0.092188	2.09112	0.096157	6.65496	0.051521
S2 spike	764	773	NRALTGIAVE			9	1043.58	S2_FL_complex	166.667	1047.93	0.1222	3.82779	0.125221	6.65003	0.034313
S2 spike	764	782	NRALTGIAVEQDKNTQEVF			18	2133.09	S2_3A3Fab_complex	0	2134.23	0.015107	0	0	6.93185	0.033663
S2 spike	764	782	NRALTGIAVEQDKNTQEVF			18	2133.09	S2_3A3Fab_complex	0.167	2135.76	0.084163	1.52449	0.085508	6.97037	0.00122
S2 spike	764	782	NRALTGIAVEQDKNTQEVF			18	2133.09	S2_3A3Fab_complex	1.667	2136.36	0.106827	2.12515	0.10789	6.97356	0.008634
S2 spike	764	782	NRALTGIAVEQDKNTQEVF			18	2133.09	S2_3A3Fab_complex	16.667	2137.63	0.064062	3.40089	0.065819	6.92644	0.031917
S2 spike	764	782	NRALTGIAVEQDKNTQEVF			18	2133.09	S2_3A3Fab_complex	166.667	2139.31	0.208138	5.07117	0.208685	6.96865	0.007569
S2 spike	764	782	NRALTGIAVEQDKNTQEVF			18	2133.09	S2_Alone	0	2134.23	0.015107	0	0	6.93185	0.033663
S2 spike	764	782	NRALTGIAVEQDKNTQEVF			18	2133.09	S2_Alone	0.167	2135.8	0.081725	1.56822	0.08311	6.9379	0.029837
S2 spike	764	782	NRALTGIAVEQDKNTQEVF			18	2133.09	S2_Alone	1.667	2136.38	0.089953	2.14313	0.091213	6.94265	0.042963
S2 spike	764	782	NRALTGIAVEQDKNTQEVF			18	2133.09	S2_Alone	16.667	2137.65	0.127201	3.4192	0.128095	6.96932	0.008036
S2 spike	764	782	NRALTGIAVEQDKNTQEVF			18	2133.09	S2_Alone	166.667	2139.38	0.181915	5.14281	0.182542	6.92004	0.035508
S2 spike	764	782	NRALTGIAVEQDKNTQEVF			18	2133.09	S2_FL_complex	0	2134.23	0.015107	0	0	6.93185	0.033663
S2 spike	764	782	NRALTGIAVEQDKNTQEVF			18	2133.09	S2_FL_complex	0.167	2135.78	0.13194	1.55027	0.132802	6.95514	0.034327
S2 spike	764	782	NRALTGIAVEQDKNTQEVF			18	2133.09	S2_FL_complex	1.667	2136.24	0.157644	2.00563	0.158366	6.96919	0.011096
S2 spike	764	782	NRALTGIAVEQDKNTQEVF			18	2133.09	S2_FL_complex	16.667	2137.4	0.117785	3.16568	0.11875	6.94795	0.040811
S2 spike	764	782	NRALTGIAVEQDKNTQEVF			18	2133.09	S2_FL_complex	166.667	2139.33	0.134065	5.09727	0.134913	6.94123	0.025749
S2 spike	770	780	IAVEQDKNTQE			10	1274.62	S2_3A3Fab_complex	0	1275.25	0.009283	0	0	5.62129	0.058873
S2 spike	770	780	IAVEQDKNTQE			10	1274.62	S2_3A3Fab_complex	0.167	1275.59	0.021855	0.339501	0.023744	5.68945	0.004071
S2 spike	770	780	IAVEQDKNTQE			10	1274.62	S2_3A3Fab_complex	1.667	1275.86	0.029606	0.609146	0.031027	5.69299	0.007081
S2 spike	770	780	IAVEQDKNTQE			10	1274.62	S2_3A3Fab_complex	16.667	1276.33	0.089723	1.08025	0.090202	5.65558	0.064249
S2 spike	770	780	IAVEQDKNTQE			10	1274.62	S2_3A3Fab_complex	166.667	1277.33	0.018756	2.07796	0.020927	5.70273	0.015176
S2 spike	770	780	IAVEQDKNTQE			10	1274.62	S2_Alone	0	1275.25	0.009283	0	0	5.62129	0.058873
S2 spike	770	780	IAVEQDKNTQE			10	1274.62	S2_Alone	0.167	1275.64	0.043052	0.382034	0.044041	5.65763	0.04949
S2 spike	770	780	IAVEQDKNTQE			10	1274.62	S2_Alone	1.667	1275.84	0.070833	0.590278	0.071438	5.67314	0.074028
S2 spike	770	780	IAVEQDKNTQE			10	1274.62	S2_Alone	16.667	1276.36	0.049799	1.10977	0.050657	5.69793	0.017548
S2 spike	770	780	IAVEQDKNTQE			10	1274.62	S2_Alone	166.667	1277.36	0.084532	2.10217	0.08504	5.62568	0.071618
S2 spike	770	780	IAVEQDKNTQE			10	1274.62	S2_FL_complex	0	1275.25	0.009283	0	0	5.62129	0.058873
S2 spike	770	780	IAVEQDKNTQE			10	1274.62	S2_FL_complex	0.167	1275.66	0.007404	0.40954	0.011874	5.66855	0.063352
S2 spike	770	780	IAVEQDKNTQE			10	1274.62	S2_FL_complex	1.667	1275.84	0.043678	0.583889	0.044653	5.69598	0.022582
S2 spike	770	780	IAVEQDKNTQE			10	1274.62	S2_FL_complex	16.667	1276.39	0.02281	1.13435	0.024626	5.664	0.068272
S2 spike	770	780	IAVEQDKNTQE			10	1274.62	S2_FL_complex	166.667	1277.33	0.073723	2.07202	0.074305	5.65087	0.047772
S2 spike	770	781	IAVEQDKNTQEV			11	1373.69	S2_3A3Fab_complex	0	1374.4	0.043028	0	0	6.0548	0.051461
S2 spike	770	781	IAVEQDKNTQEV			11	1373.69	S2_3A3Fab_complex	0.167	1374.76	0.013638	0.361172	0.045138	6.11906	0.000332
S2 spike	770	781	IAVEQDKNTQEV			11	1373.69	S2_3A3Fab_complex	1.667	1375.05	0.027762	0.648054	0.051207	6.11936	0.005717
S2 spike	770	781	IAVEQDKNTQEV			11	1373.69	S2_3A3Fab_complex	16.667	1375.51	0.067848	1.11051	0.080342	6.07894	0.05657
S2 spike	770	781	IAVEQDKNTQEV			11	1373.69	S2_3A3Fab_complex	166.667	1376.49	0.08625	2.08933	0.096388	6.12281	0.016246
S2 spike	770	781	IAVEQDKNTQEV			11	1373.69	S2_Alone	0	1374.4	0.043028	0	0	6.0548	0.051461
S2 spike	770	781	IAVEQDKNTQEV			11	1373.69	S2_Alone	0.167	1374.81	0.094302	0.409969	0.103655	6.0831	0.045404
S2 spike	770	781	IAVEQDKNTQEV			11	1373.69	S2_Alone	1.667	1375.03	0.089804	0.629213	0.09958	6.08184	0.067902
S2 spike	770	781	IAVEQDKNTQEV			11	1373.69	S2_Alone	16.667	1375.6	0.076857	1.19882	0.088082	6.12075	0.015735
S2 spike	770	781	IAVEQDKNTQEV			11	1373.69	S2_Alone	166.667	1376.55	0.071706	2.15057	0.083625	6.05495	0.059399
S2 spike	770	781	IAVEQDKNTQEV			11	1373.69	S2_FL_complex	0	1374.4	0.043028	0	0	6.0548	0.051461
S2 spike	770	781	IAVEQDKNTQEV			11	1373.69	S2_FL_complex	0.167	1374.84	0.059163	0.433448	0.073155	6.09095	0.057849
S2 spike	770	781	IAVEQDKNTQEV			11	1373.69	S2_FL_complex	1.667	1374.98	0.092255	0.576952	0.101796	6.12008	0.015591
S2 spike	770	781	IAVEQDKNTQEV			11	1373.69	S2_FL_complex	16.667	1375.48	0.065582	1.08056	0.078437	6.07025	0.063212
S2 spike	770	781	IAVEQDKNTQEV			11	1373.69	S2_FL_complex	166.667	1376.46	0.082835	2.05383	0.093344	6.0731	0.041398
S2 spike	772	782	VEQDKNTQEVF			10	1336.64	S2_3A3Fab_complex	0	1337.3	0.01007	0	0	6.78622	0.041612
S2 spike	772	782	VEQDKNTQEVF			10	1336.64	S2_3A3Fab_complex	0.167	1337.67	0.01831	0.370513	0.020897	6.84059	0.00291
S2 spike	772	782	VEQDKNTQEVF			10	1336.64	S2_3A3Fab_complex	1.667	1337.9	0.011682	0.597729	0.015424	6.83937	0.006571
S2 spike	772	782	VEQDKNTQEVF			10	1336.64	S2_3A3Fab_complex	16.667	1338.26	0.073002	0.959612	0.073693	6.80478	0.043125
S2 spike	772	782	VEQDKNTQEVF			10	1336.64	S2_3A3Fab_complex	166.667	1338.65	0.014358	1.35432	0.017538	6.83996	0.012021
S2 spike	772	782	VEQDKNTQEVF			10	1336.64	S2_Alone	0	1337.3	0.01007	0	0	6.78622	0.041612
S2 spike	772	782	VEQDKNTQEVF			10	1336.64	S2_Alone	0.167	1337.72	0.072498	0.426233	0.073194	6.80372	0.038485
S2 spike	772	782	VEQDKNTQEVF			10	1336.64	S2_Alone	1.667	1337.92	0.08584	0.621491	0.086429	6.8101	0.053385
S2 spike	772	782	VEQDKNTQEVF			10	1336.64	S2_Alone	16.667	1338.31	0.046683	1.00676	0.047757	6.83743	0.012074
S2 spike	772	782	VEQDKNTQEVF			10	1336.64	S2_Alone	166.667	1338.73	0.067138	1.4328	0.067889	6.78272	0.046121
S2 spike	772	782	VEQDKNTQEVF			10	1336.64	S2_FL_complex	0	1337.3	0.01007	0	0	6.78622	0.041612
S2 spike	772	782	VEQDKNTQEVF			10	1336.64	S2_FL_complex	0.167	1337.73	0.016272	0.435941	0.019136	6.81624	0.043327
S2 spike	772	782	VEQDKNTQEVF			10	1336.64	S2_FL_complex	1.667	1337.85	0.081001	0.552731	0.081625	6.83291	0.014773
S2 spike	772	782	VEQDKNTQEVF			10	1336.64	S2_FL_complex	16.667	1338.23	0.09505	0.93495	0.095582	6.79803	0.049269
S2 spike	772	782	VEQDKNTQEVF			10	1336.64	S2_FL_complex	166.667	1338.69	0.069981	1.38796	0.070702	6.80056	0.029731
S2 spike	772	783	VEQDKNTQEVFA			11	1407.67	S2_3A3Fab_complex	0	1408.35	0.033223	0	0	6.61784	0.044427
S2 spike	772	783	VEQDKNTQEVFA			11	1407.67	S2_3A3Fab_complex	0.167	1408.78	0.021024	0.426972	0.039316	6.6667	0.004745
S2 spike	772	783	VEQDKNTQEVFA			11	1407.67	S2_3A3Fab_complex	1.667	1408.97	0.062533	0.612785	0.07081	6.67317	0.002194
S2 spike	772	783	VEQDKNTQEVFA			11	1407.67	S2_3A3Fab_complex	16.667	1409.34	0.009392	0.989342	0.034525	6.66771	0.01129
S2 spike	772	783	VEQDKNTQEVFA			11	1407.67	S2_3A3Fab_complex	166.667	1409.87	0.071556	1.513	0.078893	6.65733	0.000353
S2 spike	772	783	VEQDKNTQEVFA			11	1407.67	S2_Alone	0	1408.35	0.033223	0	0	6.61784	0.044427
S2 spike	772	783	VEQDKNTQEVFA			11	1407.67	S2_Alone	0.167	1408.8	0.099412	0.451299	0.104817	6.66192	0.007498
S2 spike	772	783	VEQDKNTQEVFA			11	1407.67	S2_Alone	1.667	1409.03	0.102182	0.67745	0.107447	6.62424	0.052504
S2 spike	772	783	VEQDKNTQEVFA			11	1407.67	S2_Alone	16.667	1409.52	0.02327	1.16393	0.040562	6.65524	0.001283
S2 spike	772	783	VEQDKNTQEVFA			11	1407.67	S2_Alone	166.667	1409.78	0.082898	1.42326	0.089307	6.67546	0.01098
S2 spike	772	783	VEQDKNTQEVFA			11	1407.67	S2_FL_complex	0	1408.35	0.033223	0	0	6.61784	0.044427
S2 spike	772	783	VEQDKNTQEVFA			11	1407.67	S2_FL_complex	0.167	1408.82	0.050892	0.468696	0.060776	6.64353	0.046777
S2 spike	772	783	VEQDKNTQEVFA			11	1407.67	S2_FL_complex	1.667	1408.98	0.098756	0.62924	0.104195	6.66033	0.018025
S2 spike	772	783	VEQDKNTQEVFA			11	1407.67	S2_FL_complex	16.667	1409.43	0.087316	1.07464	0.093423	6.63892	0.048326
S2 spike	772	783	VEQDKNTQEVFA			11	1407.67	S2_FL_complex	166.667	1409.76	0.17054	1.40404	0.173746	6.62261	0.034472
S2 spike	774	782	QDKNTQEVF			8	1108.53	S2_3A3Fab_complex	0	1113.26	0.044856	0	0	6.68158	0.006493
S2 spike	774	782	QDKNTQEVF			8	1108.53	S2_3A3Fab_complex	0.167	1113.85	0	0.583849	0.044856	6.76417	0
S2 spike	774	782	QDKNTQEVF			8	1108.53	S2_3A3Fab_complex	1.667	1114.38	0	1.11427	0.044856	6.76431	0
S2 spike	774	782	QDKNTQEVF			8	1108.53	S2_3A3Fab_complex	16.667	1114.84	0	1.57444	0.044856	6.75526	0
S2 spike	774	782	QDKNTQEVF			8	1108.53	S2_3A3Fab_complex	166.667	1115.25	0	1.98429	0.044856	6.75615	0
S2 spike	774	782	QDKNTQEVF			8	1108.53	S2_Alone	0	1113.25	0.073169	0	0	6.71255	0.039135
S2 spike	774	782	QDKNTQEVF			8	1108.53	S2_Alone	0.167	1113.83	0.108607	0.574377	0.130955	6.74119	0.038565
S2 spike	774	782	QDKNTQEVF			8	1108.53	S2_Alone	1.667	1114.31	0.13463	1.06012	0.153228	6.74979	0.047418
S2 spike	774	782	QDKNTQEVF			8	1108.53	S2_Alone	16.667	1114.83	0.08546	1.57393	0.112504	6.7668	0.006066
S2 spike	774	782	QDKNTQEVF			8	1108.53	S2_Alone	166.667	1115.22	0.094762	1.96555	0.119723	6.74541	0.041416
S2 spike	774	782	QDKNTQEVF			8	1108.53	S2_FL_complex	0	1113.28	0.047924	0	0	6.72006	0.038484
S2 spike	774	782	QDKNTQEVF			8	1108.53	S2_FL_complex	0.167	1114.01	0.162243	0.735492	0.169173	6.74846	0.031383
S2 spike	774	782	QDKNTQEVF			8	1108.53	S2_FL_complex	1.667	1114.41	0.032896	1.13702	0.058128	6.75651	0.020851
S2 spike	774	782	QDKNTQEVF			8	1108.53	S2_FL_complex	16.667	1114.89	0.029899	1.61393	0.056486	6.74057	0.045315
S2 spike	774	782	QDKNTQEVF			8	1108.53	S2_FL_complex	166.667	1115.27	0.09069	1.99056	0.102574	6.72875	0.026378
S2 spike	783	796	AQVKQIYKTPPIKD			11	1628.94	S2_3A3Fab_complex	0	1629.96	0.056298	0	0	5.98093	0.051778
S2 spike	783	796	AQVKQIYKTPPIKD			11	1628.94	S2_3A3Fab_complex	0.167	1633.61	0.188917	3.6524	0.197128	6.04529	0.002227
S2 spike	783	796	AQVKQIYKTPPIKD			11	1628.94	S2_3A3Fab_complex	1.667	1634.53	0.07519	4.57256	0.093931	6.04686	0.010187
S2 spike	783	796	AQVKQIYKTPPIKD			11	1628.94	S2_3A3Fab_complex	16.667	1634.9	0.132911	4.94083	0.144343	5.99789	0.056173
S2 spike	783	796	AQVKQIYKTPPIKD			11	1628.94	S2_3A3Fab_complex	166.667	1635.65	0.03373	5.69353	0.065629	6.04856	0.018025
S2 spike	783	796	AQVKQIYKTPPIKD			11	1628.94	S2_Alone	0	1629.96	0.056298	0	0	5.98093	0.051778
S2 spike	783	796	AQVKQIYKTPPIKD			11	1628.94	S2_Alone	0.167	1633.7	0.196112	3.74492	0.204032	6.00212	0.049389
S2 spike	783	796	AQVKQIYKTPPIKD			11	1628.94	S2_Alone	1.667	1634.4	0.151494	4.44475	0.161617	6.01598	0.066553
S2 spike	783	796	AQVKQIYKTPPIKD			11	1628.94	S2_Alone	16.667	1634.86	0.163076	4.90372	0.172521	6.04314	0.018293
S2 spike	783	796	AQVKQIYKTPPIKD			11	1628.94	S2_Alone	166.667	1635.58	0.08841	5.62099	0.104814	5.97652	0.058793
S2 spike	783	796	AQVKQIYKTPPIKD			11	1628.94	S2_FL_complex	0	1629.96	0.056298	0	0	5.98093	0.051778
S2 spike	783	796	AQVKQIYKTPPIKD			11	1628.94	S2_FL_complex	0.167	1633.63	0.15552	3.6766	0.165397	6.01552	0.057013
S2 spike	783	796	AQVKQIYKTPPIKD			11	1628.94	S2_FL_complex	1.667	1634.48	0.101552	4.52313	0.116113	6.03481	0.018089
S2 spike	783	796	AQVKQIYKTPPIKD			11	1628.94	S2_FL_complex	16.667	1635.01	0.143929	5.0544	0.154548	5.98792	0.068661
S2 spike	783	796	AQVKQIYKTPPIKD			11	1628.94	S2_FL_complex	166.667	1635.59	0.159047	5.62997	0.168717	5.98496	0.042191
S2 spike	788	799	IYKTPPIKDFGG			9	1335.73	S2_3A3Fab_complex	0	1336.38	0.017291	0	0	6.21517	0.051379
S2 spike	788	799	IYKTPPIKDFGG			9	1335.73	S2_3A3Fab_complex	0.167	1337.85	0.069947	1.4721	0.072053	6.27426	0.006468
S2 spike	788	799	IYKTPPIKDFGG			9	1335.73	S2_3A3Fab_complex	1.667	1338.53	0.078351	2.15408	0.080237	6.27193	0.011222
S2 spike	788	799	IYKTPPIKDFGG			9	1335.73	S2_3A3Fab_complex	16.667	1338.79	0.016686	2.41248	0.024029	6.19636	0.041402
S2 spike	788	799	IYKTPPIKDFGG			9	1335.73	S2_3A3Fab_complex	166.667	1338.85	0.0483	2.46634	0.051302	6.27097	0.011677
S2 spike	788	799	IYKTPPIKDFGG			9	1335.73	S2_Alone	0	1336.38	0.017291	0	0	6.21517	0.051379
S2 spike	788	799	IYKTPPIKDFGG			9	1335.73	S2_Alone	0.167	1337.91	0.022716	1.53098	0.028548	6.22419	0.042648
S2 spike	788	799	IYKTPPIKDFGG			9	1335.73	S2_Alone	1.667	1338.49	0.146999	2.11049	0.148013	6.30425	0.015424
S2 spike	788	799	IYKTPPIKDFGG			9	1335.73	S2_Alone	16.667	1338.72	0.138182	2.34368	0.13926	6.28574	0.014798
S2 spike	788	799	IYKTPPIKDFGG			9	1335.73	S2_Alone	166.667	1338.87	0	2.48513	0.017291	6.28014	0
S2 spike	788	799	IYKTPPIKDFGG			9	1335.73	S2_FL_complex	0	1336.38	0.017291	0	0	6.21517	0.051379
S2 spike	788	799	IYKTPPIKDFGG			9	1335.73	S2_FL_complex	0.167	1337.98	0.00186	1.60217	0.017391	6.21057	0.051997
S2 spike	788	799	IYKTPPIKDFGG			9	1335.73	S2_FL_complex	1.667	1338.52	0.097054	2.13664	0.098583	6.26413	0.018557
S2 spike	788	799	IYKTPPIKDFGG			9	1335.73	S2_FL_complex	16.667	1338.86	0.031661	2.48189	0.036075	6.23745	0.063066
S2 spike	788	799	IYKTPPIKDFGG			9	1335.73	S2_FL_complex	166.667	1338.79	0.062926	2.409	0.065258	6.24978	0.013051
S2 spike	822	828	LFNKVTL			6	834.508	S2_3A3Fab_complex	0	834.904	0.01728	0	0	7.23056	0.031489
S2 spike	822	828	LFNKVTL			6	834.508	S2_3A3Fab_complex	0.167	837.929	0.058289	3.02518	0.060797	7.26034	0.002542
S2 spike	822	828	LFNKVTL			6	834.508	S2_3A3Fab_complex	1.667	838.013	0.102445	3.10923	0.103892	7.25877	0.007353
S2 spike	822	828	LFNKVTL			6	834.508	S2_3A3Fab_complex	16.667	838.118	0.115124	3.21444	0.116413	7.22889	0.03035
S2 spike	822	828	LFNKVTL			6	834.508	S2_3A3Fab_complex	166.667	838.196	0.082398	3.292	0.084191	7.2546	0.011682
S2 spike	822	828	LFNKVTL			6	834.508	S2_Alone	0	834.904	0.01728	0	0	7.23056	0.031489
S2 spike	822	828	LFNKVTL			6	834.508	S2_Alone	0.167	837.923	0.059512	3.0191	0.06197	7.23767	0.0289
S2 spike	822	828	LFNKVTL			6	834.508	S2_Alone	1.667	838.051	0.083005	3.14742	0.084784	7.24684	0.039262
S2 spike	822	828	LFNKVTL			6	834.508	S2_Alone	16.667	838.107	0.037765	3.20275	0.04153	7.26551	0.009658
S2 spike	822	828	LFNKVTL			6	834.508	S2_Alone	166.667	838.138	0.110511	3.23394	0.111854	7.22599	0.036761
S2 spike	822	828	LFNKVTL			6	834.508	S2_FL_complex	0	834.904	0.01728	0	0	7.23056	0.031489
S2 spike	822	828	LFNKVTL			6	834.508	S2_FL_complex	0.167	837.959	0.036623	3.0546	0.040494	7.24212	0.033081
S2 spike	822	828	LFNKVTL			6	834.508	S2_FL_complex	1.667	838.045	0.088056	3.14065	0.089735	7.25279	0.01392
S2 spike	822	828	LFNKVTL			6	834.508	S2_FL_complex	16.667	838.148	0.066921	3.24426	0.069116	7.23385	0.041208
S2 spike	822	828	LFNKVTL			6	834.508	S2_FL_complex	166.667	838.128	0.127438	3.22422	0.128604	7.23264	0.023021
S2 spike	822	833	LFNKVTLADAGF			11	1295.7	S2_3A3Fab_complex	0	1296.49	0.037158	0	0	7.67945	0.021095
S2 spike	822	833	LFNKVTLADAGF			11	1295.7	S2_3A3Fab_complex	0.167	1301.64	0.069638	5.15639	0.078932	7.69374	0.002857
S2 spike	822	833	LFNKVTLADAGF			11	1295.7	S2_3A3Fab_complex	1.667	1301.95	0.212967	5.46649	0.216184	7.69234	0.012443
S2 spike	822	833	LFNKVTLADAGF			11	1295.7	S2_3A3Fab_complex	16.667	1301.71	0.131561	5.22247	0.136708	7.67311	0.018104
S2 spike	822	833	LFNKVTLADAGF			11	1295.7	S2_3A3Fab_complex	166.667	1301.86	0.137861	5.37503	0.142781	7.68747	0.010719
S2 spike	822	833	LFNKVTLADAGF			11	1295.7	S2_Alone	0	1296.49	0.037158	0	0	7.67945	0.021095
S2 spike	822	833	LFNKVTLADAGF			11	1295.7	S2_Alone	0.167	1301.78	0.024868	5.28811	0.044711	7.68269	0.022591
S2 spike	822	833	LFNKVTLADAGF			11	1295.7	S2_Alone	1.667	1301.89	0.107987	5.40627	0.114201	7.68813	0.022443
S2 spike	822	833	LFNKVTLADAGF			11	1295.7	S2_Alone	16.667	1301.75	0.12953	5.26116	0.134755	7.69667	0.007852
S2 spike	822	833	LFNKVTLADAGF			11	1295.7	S2_Alone	166.667	1301.79	0.100286	5.30375	0.106948	7.68046	0.025364
S2 spike	822	833	LFNKVTLADAGF			11	1295.7	S2_FL_complex	0	1296.49	0.037158	0	0	7.67945	0.021095
S2 spike	822	833	LFNKVTLADAGF			11	1295.7	S2_FL_complex	0.167	1301.6	0.092805	5.11256	0.099968	7.68189	0.023544
S2 spike	822	833	LFNKVTLADAGF			11	1295.7	S2_FL_complex	1.667	1301.9	0.206829	5.41808	0.21014	7.68216	0.013339
S2 spike	822	833	LFNKVTLADAGF			11	1295.7	S2_FL_complex	16.667	1301.77	0.125503	5.28195	0.130888	7.69606	0.000782
S2 spike	822	833	LFNKVTLADAGF			11	1295.7	S2_FL_complex	166.667	1301.92	0.115981	5.4288	0.121788	7.67126	0.000699
S2 spike	823	832	FNKVTLADAG			9	1035.55	S2_3A3Fab_complex	0	1036.19	0.031548	0	0	6.5953	0.021288
S2 spike	823	832	FNKVTLADAG			9	1035.55	S2_3A3Fab_complex	0.167	1040.75	0.059767	4.56011	0.067582	6.60121	0.004434
S2 spike	823	832	FNKVTLADAG			9	1035.55	S2_3A3Fab_complex	1.667	1040.8	0.035441	4.60096	0.047448	6.60133	0.005704
S2 spike	823	832	FNKVTLADAG			9	1035.55	S2_3A3Fab_complex	16.667	1040.8	0.036154	4.60353	0.047983	6.60761	0.009718
S2 spike	823	832	FNKVTLADAG			9	1035.55	S2_3A3Fab_complex	166.667	1040.91	0.011007	4.71393	0.033413	6.59695	0.00182
S2 spike	823	832	FNKVTLADAG			9	1035.55	S2_Alone	0	1036.19	0.031548	0	0	6.5953	0.021288
S2 spike	823	832	FNKVTLADAG			9	1035.55	S2_Alone	0.167	1040.81	0.136156	4.61572	0.139763	6.59653	0.009246
S2 spike	823	832	FNKVTLADAG			9	1035.55	S2_Alone	1.667	1040.77	0.042542	4.58034	0.052963	6.61744	0.010939
S2 spike	823	832	FNKVTLADAG			9	1035.55	S2_Alone	16.667	1040.89	0.050662	4.69273	0.059682	6.59907	0.005463
S2 spike	823	832	FNKVTLADAG			9	1035.55	S2_Alone	166.667	1040.91	0.047823	4.71384	0.057291	6.60977	0.006609
S2 spike	823	832	FNKVTLADAG			9	1035.55	S2_FL_complex	0	1036.19	0.031548	0	0	6.5953	0.021288
S2 spike	823	832	FNKVTLADAG			9	1035.55	S2_FL_complex	0.167	1040.82	0.086747	4.62411	0.092306	6.60488	0.013188
S2 spike	823	832	FNKVTLADAG			9	1035.55	S2_FL_complex	1.667	1040.93	0.106322	4.7352	0.110904	6.59664	0.020456
S2 spike	823	832	FNKVTLADAG			9	1035.55	S2_FL_complex	16.667	1040.86	0.051015	4.66404	0.059982	6.60588	0.005057
S2 spike	823	832	FNKVTLADAG			9	1035.55	S2_FL_complex	166.667	1040.92	0.0096	4.72102	0.032976	6.58071	0.008494
S2 spike	823	833	FNKVTLADAGF			10	1182.62	S2_3A3Fab_complex	0	1183.28	0.016874	0	0	7.44177	0.024517
S2 spike	823	833	FNKVTLADAGF			10	1182.62	S2_3A3Fab_complex	0.167	1188.43	0.08347	5.15082	0.085159	7.47119	0.001879
S2 spike	823	833	FNKVTLADAGF			10	1182.62	S2_3A3Fab_complex	1.667	1188.6	0.085855	5.31503	0.087497	7.46712	0.008533
S2 spike	823	833	FNKVTLADAGF			10	1182.62	S2_3A3Fab_complex	16.667	1188.46	0.032744	5.18147	0.036836	7.44731	0.024505
S2 spike	823	833	FNKVTLADAGF			10	1182.62	S2_3A3Fab_complex	166.667	1188.56	0.122214	5.27557	0.123373	7.4663	0.011014
S2 spike	823	833	FNKVTLADAGF			10	1182.62	S2_Alone	0	1183.28	0.016874	0	0	7.44177	0.024517
S2 spike	823	833	FNKVTLADAGF			10	1182.62	S2_Alone	0.167	1188.53	0.057655	5.24518	0.060074	7.44439	0.023088
S2 spike	823	833	FNKVTLADAGF			10	1182.62	S2_Alone	1.667	1188.56	0.064512	5.28022	0.066682	7.45182	0.030734
S2 spike	823	833	FNKVTLADAGF			10	1182.62	S2_Alone	16.667	1188.49	0.09041	5.20531	0.091972	7.46655	0.008324
S2 spike	823	833	FNKVTLADAGF			10	1182.62	S2_Alone	166.667	1188.55	0.119776	5.26931	0.120958	7.43983	0.029376
S2 spike	823	833	FNKVTLADAGF			10	1182.62	S2_FL_complex	0	1183.28	0.016874	0	0	7.44177	0.024517
S2 spike	823	833	FNKVTLADAGF			10	1182.62	S2_FL_complex	0.167	1188.41	0.065196	5.12836	0.067345	7.45922	0.02547
S2 spike	823	833	FNKVTLADAGF			10	1182.62	S2_FL_complex	1.667	1188.54	0.09525	5.25466	0.096733	7.46665	0.011011
S2 spike	823	833	FNKVTLADAGF			10	1182.62	S2_FL_complex	16.667	1188.44	0.072609	5.15315	0.074544	7.45517	0.028211
S2 spike	823	833	FNKVTLADAGF			10	1182.62	S2_FL_complex	166.667	1188.53	0.092316	5.25124	0.093845	7.44329	0.016143
S2 spike	824	833	NKVTLADAGF			9	1035.55	S2_3A3Fab_complex	0	1036.03	0.015251	0	0	7.17977	0.033465
S2 spike	824	833	NKVTLADAGF			9	1035.55	S2_3A3Fab_complex	0.167	1040.8	0.084402	4.76785	0.085769	7.2141	0.00302
S2 spike	824	833	NKVTLADAGF			9	1035.55	S2_3A3Fab_complex	1.667	1040.84	0.072365	4.81308	0.073955	7.2117	0.008464
S2 spike	824	833	NKVTLADAGF			9	1035.55	S2_3A3Fab_complex	16.667	1040.81	0.104119	4.78348	0.10523	7.18327	0.033064
S2 spike	824	833	NKVTLADAGF			9	1035.55	S2_3A3Fab_complex	166.667	1040.79	0.107946	4.75673	0.109018	7.21125	0.012732
S2 spike	824	833	NKVTLADAGF			9	1035.55	S2_Alone	0	1036.03	0.015251	0	0	7.17977	0.033465
S2 spike	824	833	NKVTLADAGF			9	1035.55	S2_Alone	0.167	1040.86	0.109844	4.83287	0.110898	7.18698	0.029293
S2 spike	824	833	NKVTLADAGF			9	1035.55	S2_Alone	1.667	1040.79	0.10904	4.7609	0.110101	7.19559	0.040512
S2 spike	824	833	NKVTLADAGF			9	1035.55	S2_Alone	16.667	1040.73	0.061914	4.69961	0.063764	7.21727	0.009249
S2 spike	824	833	NKVTLADAGF			9	1035.55	S2_Alone	166.667	1040.82	0.185473	4.79146	0.186099	7.17736	0.037393
S2 spike	824	833	NKVTLADAGF			9	1035.55	S2_FL_complex	0	1036.03	0.015251	0	0	7.17977	0.033465
S2 spike	824	833	NKVTLADAGF			9	1035.55	S2_FL_complex	0.167	1040.79	0.064967	4.75946	0.066733	7.19474	0.034484
S2 spike	824	833	NKVTLADAGF			9	1035.55	S2_FL_complex	1.667	1040.89	0.134993	4.86064	0.135852	7.20768	0.012074
S2 spike	824	833	NKVTLADAGF			9	1035.55	S2_FL_complex	16.667	1040.8	0.056914	4.77299	0.058922	7.18894	0.03803
S2 spike	824	833	NKVTLADAGF			9	1035.55	S2_FL_complex	166.667	1040.77	0.17696	4.73687	0.177616	7.19477	0.006984
S2 spike	858	865	LTVLPPLL			5	865.576	S2_3A3Fab_complex	0	866.111	0.042495	0	0	8.43475	0.008934
S2 spike	858	865	LTVLPPLL			5	865.576	S2_3A3Fab_complex	0.167	866.518	0.047978	0.406956	0.064091	8.44417	0.001847
S2 spike	858	865	LTVLPPLL			5	865.576	S2_3A3Fab_complex	1.667	867.222	0.075675	1.11129	0.08679	8.42973	0.015484
S2 spike	858	865	LTVLPPLL			5	865.576	S2_3A3Fab_complex	16.667	867.746	0.060176	1.63477	0.073668	8.43079	0.005024
S2 spike	858	865	LTVLPPLL			5	865.576	S2_3A3Fab_complex	166.667	868.215	0.036331	2.10366	0.055909	8.42523	0.015062
S2 spike	858	865	LTVLPPLL			5	865.576	S2_Alone	0	866.111	0.042495	0	0	8.43475	0.008934
S2 spike	858	865	LTVLPPLL			5	865.576	S2_Alone	0.167	866.53	0.069835	0.41927	0.081748	8.42126	0.016241
S2 spike	858	865	LTVLPPLL			5	865.576	S2_Alone	1.667	867.225	0.070245	1.11399	0.082098	8.4278	0.008704
S2 spike	858	865	LTVLPPLL			5	865.576	S2_Alone	16.667	867.727	0.087702	1.61577	0.097455	8.43906	0.004338
S2 spike	858	865	LTVLPPLL			5	865.576	S2_Alone	166.667	868.192	0.05791	2.08122	0.071829	8.42918	0.011605
S2 spike	858	865	LTVLPPLL			5	865.576	S2_FL_complex	0	866.111	0.042495	0	0	8.43475	0.008934
S2 spike	858	865	LTVLPPLL			5	865.576	S2_FL_complex	0.167	866.557	0.023511	0.445817	0.048566	8.438	0.011705
S2 spike	858	865	LTVLPPLL			5	865.576	S2_FL_complex	1.667	867.193	0.06538	1.08189	0.077977	8.4235	0.020575
S2 spike	858	865	LTVLPPLL			5	865.576	S2_FL_complex	16.667	867.741	0.080316	1.63028	0.090865	8.43781	0.004599
S2 spike	858	865	LTVLPPLL			5	865.576	S2_FL_complex	166.667	868.194	0.05406	2.08319	0.068763	8.41737	0.00977
S2 spike	858	866	LTVLPPLLT			6	966.623	S2_3A3Fab_complex	0	967.139	0.029977	0	0	8.21507	0.0142
S2 spike	858	866	LTVLPPLLT			6	966.623	S2_3A3Fab_complex	0.167	967.688	0.032012	0.549889	0.043857	8.22968	0.002492
S2 spike	858	866	LTVLPPLLT			6	966.623	S2_3A3Fab_complex	1.667	968.541	0.077551	1.40288	0.083144	8.21748	0.013796
S2 spike	858	866	LTVLPPLLT			6	966.623	S2_3A3Fab_complex	16.667	969.039	0.121134	1.90012	0.124788	8.21463	0.010315
S2 spike	858	866	LTVLPPLLT			6	966.623	S2_3A3Fab_complex	166.667	969.804	0.074334	2.66585	0.080151	8.21168	0.012531
S2 spike	858	866	LTVLPPLLT			6	966.623	S2_Alone	0	967.139	0.029977	0	0	8.21507	0.0142
S2 spike	858	866	LTVLPPLLT			6	966.623	S2_Alone	0.167	967.735	0.032868	0.596002	0.044485	8.20575	0.01449
S2 spike	858	866	LTVLPPLLT			6	966.623	S2_Alone	1.667	968.503	0.070302	1.36485	0.076426	8.21505	0.011873
S2 spike	858	866	LTVLPPLLT			6	966.623	S2_Alone	16.667	969.064	0.111623	1.92562	0.115578	8.22445	0.005987
S2 spike	858	866	LTVLPPLLT			6	966.623	S2_Alone	166.667	969.758	0.073168	2.61912	0.079071	8.20949	0.015001
S2 spike	858	866	LTVLPPLLT			6	966.623	S2_FL_complex	0	967.139	0.029977	0	0	8.21507	0.0142
S2 spike	858	866	LTVLPPLLT			6	966.623	S2_FL_complex	0.167	967.758	0.022117	0.619688	0.037253	8.21966	0.012961
S2 spike	858	866	LTVLPPLLT			6	966.623	S2_FL_complex	1.667	968.568	0.102986	1.42972	0.10726	8.21949	0.013443
S2 spike	858	866	LTVLPPLLT			6	966.623	S2_FL_complex	16.667	969.102	0.081547	1.96328	0.086882	8.21786	0.011072
S2 spike	858	866	LTVLPPLLT			6	966.623	S2_FL_complex	166.667	969.748	0.092495	2.60931	0.097231	8.20128	0.007696
S2 spike	858	868	LTVLPPLLTDE			8	1210.69	S2_3A3Fab_complex	0	1211.3	0.020673	0	0	8.22233	0.013552
S2 spike	858	868	LTVLPPLLTDE			8	1210.69	S2_3A3Fab_complex	0.167	1212.57	0.122282	1.26625	0.124017	8.23331	0.005446
S2 spike	858	868	LTVLPPLLTDE			8	1210.69	S2_3A3Fab_complex	1.667	1213.53	0.134586	2.22459	0.136164	8.22013	0.010452
S2 spike	858	868	LTVLPPLLTDE			8	1210.69	S2_3A3Fab_complex	16.667	1213.92	0.029304	2.61395	0.035862	8.21751	0.010034
S2 spike	858	868	LTVLPPLLTDE			8	1210.69	S2_3A3Fab_complex	166.667	1214.77	0.074877	3.46444	0.077679	8.20827	0.003441
S2 spike	858	868	LTVLPPLLTDE			8	1210.69	S2_Alone	0	1211.3	0.020673	0	0	8.22233	0.013552
S2 spike	858	868	LTVLPPLLTDE			8	1210.69	S2_Alone	0.167	1212.51	0.089344	1.20457	0.091705	8.21551	0.018226
S2 spike	858	868	LTVLPPLLTDE			8	1210.69	S2_Alone	1.667	1213.47	0.106011	2.17074	0.108008	8.22218	0.012403
S2 spike	858	868	LTVLPPLLTDE			8	1210.69	S2_Alone	16.667	1213.97	0.099164	2.66329	0.101296	8.22824	0.004702
S2 spike	858	868	LTVLPPLLTDE			8	1210.69	S2_Alone	166.667	1214.69	0.075271	3.38173	0.078059	8.21998	0.016371
S2 spike	858	868	LTVLPPLLTDE			8	1210.69	S2_FL_complex	0	1211.3	0.020673	0	0	8.22233	0.013552
S2 spike	858	868	LTVLPPLLTDE			8	1210.69	S2_FL_complex	0.167	1212.59	0.084178	1.28323	0.086679	8.21291	0.018988
S2 spike	858	868	LTVLPPLLTDE			8	1210.69	S2_FL_complex	1.667	1213.41	0.153789	2.10266	0.155172	8.2223	0.013223
S2 spike	858	868	LTVLPPLLTDE			8	1210.69	S2_FL_complex	16.667	1213.95	0.056648	2.64346	0.060302	8.22531	0.010714
S2 spike	858	868	LTVLPPLLTDE			8	1210.69	S2_FL_complex	166.667	1214.72	0.073373	3.41452	0.07623	8.20525	0.009271
S2 spike	859	866	TVLPPLLT			5	853.539	S2_3A3Fab_complex	0	854.128	0.048615	0	0	7.90985	0.018064
S2 spike	859	866	TVLPPLLT			5	853.539	S2_3A3Fab_complex	0.167	854.442	0.01199	0.314012	0.050071	7.93156	0.002546
S2 spike	859	866	TVLPPLLT			5	853.539	S2_3A3Fab_complex	1.667	854.888	0.007116	0.760581	0.049133	7.92782	0.010218
S2 spike	859	866	TVLPPLLT			5	853.539	S2_3A3Fab_complex	16.667	855.443	0.02486	1.3151	0.054602	7.91095	0.016828
S2 spike	859	866	TVLPPLLT			5	853.539	S2_3A3Fab_complex	166.667	856.073	0.03462	1.94524	0.059682	7.92212	0.011549
S2 spike	859	866	TVLPPLLT			5	853.539	S2_Alone	0	854.128	0.048615	0	0	7.90985	0.018064
S2 spike	859	866	TVLPPLLT			5	853.539	S2_Alone	0.167	854.456	0.025425	0.328477	0.054862	7.91271	0.017674
S2 spike	859	866	TVLPPLLT			5	853.539	S2_Alone	1.667	854.894	0.041068	0.766656	0.06364	7.9183	0.021093
S2 spike	859	866	TVLPPLLT			5	853.539	S2_Alone	16.667	855.416	0.028028	1.28824	0.056116	7.92688	0.006599
S2 spike	859	866	TVLPPLLT			5	853.539	S2_Alone	166.667	856.085	0.045265	1.9576	0.066425	7.90832	0.023726
S2 spike	859	866	TVLPPLLT			5	853.539	S2_FL_complex	0	854.128	0.048615	0	0	7.90985	0.018064
S2 spike	859	866	TVLPPLLT			5	853.539	S2_FL_complex	0.167	854.448	0.018271	0.320213	0.051935	7.92145	0.018208
S2 spike	859	866	TVLPPLLT			5	853.539	S2_FL_complex	1.667	854.877	0.035827	0.749645	0.06039	7.92414	0.010581
S2 spike	859	866	TVLPPLLT			5	853.539	S2_FL_complex	16.667	855.43	0.036178	1.30292	0.060599	7.91604	0.020243
S2 spike	859	866	TVLPPLLT			5	853.539	S2_FL_complex	166.667	856.077	0.055302	1.94941	0.073632	7.90416	0.010027
S2 spike	859	867	TVLPPLLTD			6	968.566	S2_3A3Fab_complex	0	969.046	0.017997	0	0	7.89907	0.019009
S2 spike	859	867	TVLPPLLTD			6	968.566	S2_3A3Fab_complex	0.167	969.765	0.012601	0.718712	0.02197	7.91863	0.00202
S2 spike	859	867	TVLPPLLTD			6	968.566	S2_3A3Fab_complex	1.667	970.278	0.046296	1.2322	0.049672	7.91293	0.010352
S2 spike	859	867	TVLPPLLTD			6	968.566	S2_3A3Fab_complex	16.667	970.828	0.043858	1.78169	0.047407	7.89846	0.017228
S2 spike	859	867	TVLPPLLTD			6	968.566	S2_3A3Fab_complex	166.667	971.499	0.111473	2.4533	0.112917	7.90975	0.00978
S2 spike	859	867	TVLPPLLTD			6	968.566	S2_Alone	0	969.046	0.017997	0	0	7.89907	0.019009
S2 spike	859	867	TVLPPLLTD			6	968.566	S2_Alone	0.167	969.824	0.047018	0.777988	0.050345	7.9008	0.018669
S2 spike	859	867	TVLPPLLTD			6	968.566	S2_Alone	1.667	970.303	0.110059	1.25716	0.11152	7.90449	0.018548
S2 spike	859	867	TVLPPLLTD			6	968.566	S2_Alone	16.667	970.878	0.066755	1.83225	0.069138	7.91288	0.007008
S2 spike	859	867	TVLPPLLTD			6	968.566	S2_Alone	166.667	971.582	0.070141	2.53614	0.072413	7.89503	0.022535
S2 spike	859	867	TVLPPLLTD			6	968.566	S2_FL_complex	0	969.046	0.017997	0	0	7.89907	0.019009
S2 spike	859	867	TVLPPLLTD			6	968.566	S2_FL_complex	0.167	969.706	0.039738	0.659825	0.043623	7.90108	0.019972
S2 spike	859	867	TVLPPLLTD			6	968.566	S2_FL_complex	1.667	970.304	0.067379	1.25805	0.069741	7.90771	0.010249
S2 spike	859	867	TVLPPLLTD			6	968.566	S2_FL_complex	16.667	970.827	0.080688	1.78116	0.08267	7.89966	0.018911
S2 spike	859	867	TVLPPLLTD			6	968.566	S2_FL_complex	166.667	971.545	0.050266	2.49947	0.053391	7.89311	0.010566
S2 spike	859	868	TVLPPLLTDE			7	1097.61	S2_3A3Fab_complex	0	1098.15	0.017279	0	0	7.94477	0.017749
S2 spike	859	868	TVLPPLLTDE			7	1097.61	S2_3A3Fab_complex	0.167	1099.1	0.044969	0.947798	0.048175	7.95456	0.002175
S2 spike	859	868	TVLPPLLTDE			7	1097.61	S2_3A3Fab_complex	1.667	1099.91	0.044224	1.76452	0.047479	7.95287	0.012246
S2 spike	859	868	TVLPPLLTDE			7	1097.61	S2_3A3Fab_complex	16.667	1100.63	0.052375	2.48614	0.055152	7.93962	0.01435
S2 spike	859	868	TVLPPLLTDE			7	1097.61	S2_3A3Fab_complex	166.667	1101.51	0.062791	3.3657	0.065125	7.94634	0.011868
S2 spike	859	868	TVLPPLLTDE			7	1097.61	S2_Alone	0	1098.15	0.017279	0	0	7.94477	0.017749
S2 spike	859	868	TVLPPLLTDE			7	1097.61	S2_Alone	0.167	1099.18	0.110103	1.03275	0.11145	7.94148	0.014873
S2 spike	859	868	TVLPPLLTDE			7	1097.61	S2_Alone	1.667	1099.88	0.063051	1.73203	0.065376	7.94482	0.01892
S2 spike	859	868	TVLPPLLTDE			7	1097.61	S2_Alone	16.667	1100.63	0.027076	2.48324	0.03212	7.95153	0.005203
S2 spike	859	868	TVLPPLLTDE			7	1097.61	S2_Alone	166.667	1101.51	0.038813	3.35915	0.042485	7.93267	0.021001
S2 spike	859	868	TVLPPLLTDE			7	1097.61	S2_FL_complex	0	1098.15	0.017279	0	0	7.94477	0.017749
S2 spike	859	868	TVLPPLLTDE			7	1097.61	S2_FL_complex	0.167	1099.12	0.02159	0.975998	0.027653	7.94645	0.012649
S2 spike	859	868	TVLPPLLTDE			7	1097.61	S2_FL_complex	1.667	1099.87	0.05353	1.71904	0.05625	7.95074	0.010397
S2 spike	859	868	TVLPPLLTDE			7	1097.61	S2_FL_complex	16.667	1100.64	0.034829	2.49466	0.038879	7.94456	0.017652
S2 spike	859	868	TVLPPLLTDE			7	1097.61	S2_FL_complex	166.667	1101.56	0.030519	3.41133	0.035071	7.92908	0.008574
S2 spike	859	869	TVLPPLLTDEM			8	1228.65	S2_3A3Fab_complex	0	1229.35	0.020474	0	0	8.29681	0.009967
S2 spike	859	869	TVLPPLLTDEM			8	1228.65	S2_3A3Fab_complex	0.167	1230.64	0.040055	1.29608	0.044984	8.30647	0.001745
S2 spike	859	869	TVLPPLLTDEM			8	1228.65	S2_3A3Fab_complex	1.667	1231.37	0.096574	2.02299	0.09872	8.29222	0.012736
S2 spike	859	869	TVLPPLLTDEM			8	1228.65	S2_3A3Fab_complex	16.667	1231.96	0.087843	2.61559	0.090197	8.28949	0.006947
S2 spike	859	869	TVLPPLLTDEM			8	1228.65	S2_3A3Fab_complex	166.667	1233.04	0.081054	3.69196	0.0836	8.27936	0.012034
S2 spike	859	869	TVLPPLLTDEM			8	1228.65	S2_Alone	0	1229.35	0.020474	0	0	8.29681	0.009967
S2 spike	859	869	TVLPPLLTDEM			8	1228.65	S2_Alone	0.167	1230.67	0.109687	1.32136	0.111582	8.28109	0.01405
S2 spike	859	869	TVLPPLLTDEM			8	1228.65	S2_Alone	1.667	1231.31	0.115531	1.96307	0.117331	8.29032	0.011517
S2 spike	859	869	TVLPPLLTDEM			8	1228.65	S2_Alone	16.667	1231.92	0.072873	2.56888	0.075694	8.29881	0.004945
S2 spike	859	869	TVLPPLLTDEM			8	1228.65	S2_Alone	166.667	1232.99	0.077779	3.6386	0.080429	8.29612	0.014645
S2 spike	859	869	TVLPPLLTDEM			8	1228.65	S2_FL_complex	0	1229.35	0.020474	0	0	8.29681	0.009967
S2 spike	859	869	TVLPPLLTDEM			8	1228.65	S2_FL_complex	0.167	1230.71	0.044189	1.35722	0.048702	8.30029	0.010543
S2 spike	859	869	TVLPPLLTDEM			8	1228.65	S2_FL_complex	1.667	1231.28	0.107525	1.9274	0.109457	8.29398	0.014257
S2 spike	859	869	TVLPPLLTDEM			8	1228.65	S2_FL_complex	16.667	1231.95	0.046423	2.60491	0.050737	8.29846	0.005941
S2 spike	859	869	TVLPPLLTDEM			8	1228.65	S2_FL_complex	166.667	1233.09	0.063477	3.73753	0.066697	8.27583	0.007157
S2 spike	870	877	IAQYTSAL			7	866.462	S2_3A3Fab_complex	0	867.063	0.0156	0	0	7.15233	0.035046
S2 spike	870	877	IAQYTSAL			7	866.462	S2_3A3Fab_complex	0.167	867.255	0.006614	0.191523	0.016944	7.19608	0.000197
S2 spike	870	877	IAQYTSAL			7	866.462	S2_3A3Fab_complex	16.667	867.511	0	0.447544	0.0156	7.20551	0
S2 spike	870	877	IAQYTSAL			7	866.462	S2_3A3Fab_complex	166.667	867.636	0	0.572515	0.0156	7.18412	0
S2 spike	870	877	IAQYTSAL			7	866.462	S2_Alone	0	867.063	0.0156	0	0	7.15233	0.035046
S2 spike	870	877	IAQYTSAL			7	866.462	S2_Alone	0.167	867.326	0.028499	0.262594	0.03249	7.16905	0.030302
S2 spike	870	877	IAQYTSAL			7	866.462	S2_Alone	1.667	867.423	0.073652	0.359591	0.075286	7.17558	0.042997
S2 spike	870	877	IAQYTSAL			7	866.462	S2_Alone	16.667	867.597	0.070502	0.533974	0.072208	7.19174	0.005153
S2 spike	870	877	IAQYTSAL			7	866.462	S2_Alone	166.667	867.692	0.045098	0.628789	0.04772	7.15712	0.040156
S2 spike	870	877	IAQYTSAL			7	866.462	S2_FL_complex	0	867.063	0.0156	0	0	7.15233	0.035046
S2 spike	870	877	IAQYTSAL			7	866.462	S2_FL_complex	0.167	867.248	0.009423	0.184757	0.018225	7.17698	0.037167
S2 spike	870	877	IAQYTSAL			7	866.462	S2_FL_complex	1.667	867.316	0.023017	0.253276	0.027806	7.20082	0.011115
S2 spike	870	877	IAQYTSAL			7	866.462	S2_FL_complex	16.667	867.515	0.044332	0.45235	0.046996	7.1733	0.040554
S2 spike	870	877	IAQYTSAL			7	866.462	S2_FL_complex	166.667	867.627	0.001607	0.564131	0.015682	7.14294	0.022119
S2 spike	870	878	IAQYTSALL			8	979.546	S2_3A3Fab_complex	0	980.027	0.013087	0	0	7.73264	0.021812
S2 spike	870	878	IAQYTSALL			8	979.546	S2_3A3Fab_complex	0.167	980.391	0.020491	0.363769	0.024314	7.76112	0.002714
S2 spike	870	878	IAQYTSALL			8	979.546	S2_3A3Fab_complex	1.667	980.544	0.040918	0.516693	0.04296	7.75572	0.010424
S2 spike	870	878	IAQYTSALL			8	979.546	S2_3A3Fab_complex	16.667	980.712	0.08156	0.684643	0.082603	7.73963	0.021043
S2 spike	870	878	IAQYTSALL			8	979.546	S2_3A3Fab_complex	166.667	980.781	0.075256	0.753429	0.076385	7.75575	0.013948
S2 spike	870	878	IAQYTSALL			8	979.546	S2_Alone	0	980.027	0.013087	0	0	7.73264	0.021812
S2 spike	870	878	IAQYTSALL			8	979.546	S2_Alone	0.167	980.401	0.056959	0.373282	0.058443	7.73626	0.019686
S2 spike	870	878	IAQYTSALL			8	979.546	S2_Alone	1.667	980.508	0.065424	0.48054	0.06672	7.74452	0.025946
S2 spike	870	878	IAQYTSALL			8	979.546	S2_Alone	16.667	980.71	0.03932	0.682187	0.041441	7.75858	0.00728
S2 spike	870	878	IAQYTSALL			8	979.546	S2_Alone	166.667	980.819	0.051099	0.79125	0.052749	7.73542	0.025819
S2 spike	870	878	IAQYTSALL			8	979.546	S2_FL_complex	0	980.027	0.013087	0	0	7.73264	0.021812
S2 spike	870	878	IAQYTSALL			8	979.546	S2_FL_complex	0.167	980.426	0.012822	0.398628	0.018322	7.75005	0.022285
S2 spike	870	878	IAQYTSALL			8	979.546	S2_FL_complex	1.667	980.497	0.077313	0.469966	0.078413	7.7557	0.011736
S2 spike	870	878	IAQYTSALL			8	979.546	S2_FL_complex	16.667	980.677	0.077821	0.649833	0.078914	7.74038	0.027994
S2 spike	870	878	IAQYTSALL			8	979.546	S2_FL_complex	166.667	980.82	0.060762	0.792856	0.062155	7.73421	0.013812
S2 spike	878	885	LAGTITSG			7	719.393	S2_3A3Fab_complex	0	719.823	0.045018	0	0	6.21348	0.044905
S2 spike	878	885	LAGTITSG			7	719.393	S2_3A3Fab_complex	0.167	720.09	0.009793	0.267747	0.046071	6.28881	0.001337
S2 spike	878	885	LAGTITSG			7	719.393	S2_3A3Fab_complex	1.667	720.198	0.021528	0.375586	0.049901	6.28689	0.00608
S2 spike	878	885	LAGTITSG			7	719.393	S2_3A3Fab_complex	16.667	720.234	0.074034	0.411285	0.086647	6.23287	0.049811
S2 spike	878	885	LAGTITSG			7	719.393	S2_3A3Fab_complex	166.667	720.547	0.069765	0.724381	0.083029	6.284	0.003408
S2 spike	878	885	LAGTITSG			7	719.393	S2_Alone	0	719.823	0.045018	0	0	6.21348	0.044905
S2 spike	878	885	LAGTITSG			7	719.393	S2_Alone	0.167	720.237	0.038167	0.414103	0.05902	6.24654	0.043715
S2 spike	878	885	LAGTITSG			7	719.393	S2_Alone	1.667	720.285	0.043469	0.461888	0.06258	6.22029	0.055124
S2 spike	878	885	LAGTITSG			7	719.393	S2_Alone	16.667	720.271	0	0.448611	0.045018	6.28313	0
S2 spike	878	885	LAGTITSG			7	719.393	S2_Alone	166.667	720.587	0.074584	0.764248	0.087117	6.20824	0.044874
S2 spike	878	885	LAGTITSG			7	719.393	S2_FL_complex	0	719.823	0.045018	0	0	6.21348	0.044905
S2 spike	878	885	LAGTITSG			7	719.393	S2_FL_complex	0.167	720.103	0.012731	0.280772	0.046784	6.23246	0.050067
S2 spike	878	885	LAGTITSG			7	719.393	S2_FL_complex	1.667	720.187	0.106145	0.364068	0.115297	6.27707	0.014227
S2 spike	878	885	LAGTITSG			7	719.393	S2_FL_complex	16.667	720.243	0.035397	0.420079	0.057268	6.23478	0.058557
S2 spike	878	885	LAGTITSG			7	719.393	S2_FL_complex	166.667	720.499	0.042257	0.676471	0.061744	6.2474	0.039899
S2 spike	878	895	LAGTITSGWTFGAGPALQ			16	1747.9	S2_3A3Fab_complex	0	1749.12	0.093501	0	0	8.11093	0.003242
S2 spike	878	895	LAGTITSGWTFGAGPALQ			16	1747.9	S2_3A3Fab_complex	0.167	1749.24	0.072429	0.115778	0.118272	8.12814	0.002528
S2 spike	878	895	LAGTITSGWTFGAGPALQ			16	1747.9	S2_3A3Fab_complex	1.667	1749.53	0.270252	0.412091	0.28597	8.11503	0.015446
S2 spike	878	895	LAGTITSGWTFGAGPALQ			16	1747.9	S2_3A3Fab_complex	16.667	1749.5	0.09499	0.376997	0.133287	8.11225	0.018987
S2 spike	878	895	LAGTITSGWTFGAGPALQ			16	1747.9	S2_3A3Fab_complex	166.667	1749.41	0.168247	0.284759	0.192483	8.11811	0.016525
S2 spike	878	895	LAGTITSGWTFGAGPALQ			16	1747.9	S2_Alone	0	1749.12	0.093501	0	0	8.11093	0.003242
S2 spike	878	895	LAGTITSGWTFGAGPALQ			16	1747.9	S2_Alone	0.167	1749.39	0.092781	0.267661	0.131723	8.09728	0.01477
S2 spike	878	895	LAGTITSGWTFGAGPALQ			16	1747.9	S2_Alone	1.667	1749.48	0.118991	0.354711	0.151332	8.09077	0.015933
S2 spike	878	895	LAGTITSGWTFGAGPALQ			16	1747.9	S2_Alone	16.667	1749.39	0.152251	0.266317	0.17867	8.10238	0.007157
S2 spike	878	895	LAGTITSGWTFGAGPALQ			16	1747.9	S2_Alone	166.667	1749.49	0.19925	0.369332	0.220098	8.08769	0.012901
S2 spike	878	895	LAGTITSGWTFGAGPALQ			16	1747.9	S2_FL_complex	0	1749.12	0.093501	0	0	8.11093	0.003242
S2 spike	878	895	LAGTITSGWTFGAGPALQ			16	1747.9	S2_FL_complex	0.167	1749.48	0.120734	0.354068	0.152706	8.12302	0.011789
S2 spike	878	895	LAGTITSGWTFGAGPALQ			16	1747.9	S2_FL_complex	1.667	1749.33	0.095502	0.209576	0.133653	8.0961	0.026011
S2 spike	878	895	LAGTITSGWTFGAGPALQ			16	1747.9	S2_FL_complex	16.667	1749.41	0.108174	0.285101	0.142983	8.1182	0.015033
S2 spike	878	895	LAGTITSGWTFGAGPALQ			16	1747.9	S2_FL_complex	166.667	1749.63	0.137622	0.506336	0.16638	8.09787	0.009362
S2 spike	886	901	WTFGAGPALQIPFPMQ			12	1760.88	S2_3A3Fab_complex	0	1762.06	0.052302	0	0	8.5789	0.00417
S2 spike	886	901	WTFGAGPALQIPFPMQ			12	1760.88	S2_3A3Fab_complex	0.167	1762.42	0.027522	0.362527	0.059102	8.5775	0.003106
S2 spike	886	901	WTFGAGPALQIPFPMQ			12	1760.88	S2_3A3Fab_complex	1.667	1762.31	0.103544	0.253317	0.116004	8.57438	0.000798
S2 spike	886	901	WTFGAGPALQIPFPMQ			12	1760.88	S2_3A3Fab_complex	16.667	1762.35	0.066563	0.293485	0.084653	8.56383	0.010295
S2 spike	886	901	WTFGAGPALQIPFPMQ			12	1760.88	S2_3A3Fab_complex	166.667	1762.47	0.084205	0.412627	0.099126	8.55086	0.017687
S2 spike	886	901	WTFGAGPALQIPFPMQ			12	1760.88	S2_Alone	0	1762.06	0.052302	0	0	8.5789	0.00417
S2 spike	886	901	WTFGAGPALQIPFPMQ			12	1760.88	S2_Alone	0.167	1762.43	0.192699	0.376951	0.199671	8.55639	0.023812
S2 spike	886	901	WTFGAGPALQIPFPMQ			12	1760.88	S2_Alone	1.667	1762.46	0.123121	0.402554	0.13377	8.55569	0.014741
S2 spike	886	901	WTFGAGPALQIPFPMQ			12	1760.88	S2_Alone	16.667	1762.44	0.08399	0.380464	0.098944	8.57274	0.006809
S2 spike	886	901	WTFGAGPALQIPFPMQ			12	1760.88	S2_Alone	166.667	1762.39	0.108223	0.335706	0.120198	8.57876	0.008964
S2 spike	886	901	WTFGAGPALQIPFPMQ			12	1760.88	S2_FL_complex	0	1762.06	0.052302	0	0	8.5789	0.00417
S2 spike	886	901	WTFGAGPALQIPFPMQ			12	1760.88	S2_FL_complex	0.167	1762.5	0.031583	0.449253	0.061098	8.57123	0.014172
S2 spike	886	901	WTFGAGPALQIPFPMQ			12	1760.88	S2_FL_complex	1.667	1762.36	0.10769	0.307742	0.119719	8.54678	0.024282
S2 spike	886	901	WTFGAGPALQIPFPMQ			12	1760.88	S2_FL_complex	16.667	1762.33	0.179162	0.276411	0.18664	8.57162	0.003607
S2 spike	886	901	WTFGAGPALQIPFPMQ			12	1760.88	S2_FL_complex	166.667	1762.42	0.048212	0.364576	0.071133	8.54605	0.017093
S2 spike	886	902	WTFGAGPALQIPFPMQM			13	1891.92	S2_3A3Fab_complex	0	1893.37	0.076761	0	0	8.81658	0.008406
S2 spike	886	902	WTFGAGPALQIPFPMQM			13	1891.92	S2_3A3Fab_complex	0.167	1893.66	0.04577	0.297524	0.089371	8.80654	0.002946
S2 spike	886	902	WTFGAGPALQIPFPMQM			13	1891.92	S2_3A3Fab_complex	1.667	1893.7	0.14621	0.33421	0.165135	8.78039	0.027268
S2 spike	886	902	WTFGAGPALQIPFPMQM			13	1891.92	S2_3A3Fab_complex	16.667	1893.55	0.066375	0.183806	0.101478	8.80639	0.014592
S2 spike	886	902	WTFGAGPALQIPFPMQM			13	1891.92	S2_3A3Fab_complex	166.667	1893.6	0.092699	0.234619	0.120355	8.77482	0.028417
S2 spike	886	902	WTFGAGPALQIPFPMQM			13	1891.92	S2_Alone	0	1893.37	0.076761	0	0	8.81658	0.008406
S2 spike	886	902	WTFGAGPALQIPFPMQM			13	1891.92	S2_Alone	0.167	1893.69	0.19515	0.321698	0.209704	8.77225	0.034158
S2 spike	886	902	WTFGAGPALQIPFPMQM			13	1891.92	S2_Alone	1.667	1893.76	0.181377	0.389529	0.196951	8.78155	0.025175
S2 spike	886	902	WTFGAGPALQIPFPMQM			13	1891.92	S2_Alone	16.667	1893.67	0.091572	0.305796	0.119489	8.79603	0.012961
S2 spike	886	902	WTFGAGPALQIPFPMQM			13	1891.92	S2_Alone	166.667	1893.64	0.111933	0.269658	0.135725	8.81886	0.005891
S2 spike	886	902	WTFGAGPALQIPFPMQM			13	1891.92	S2_FL_complex	0	1893.37	0.076761	0	0	8.81658	0.008406
S2 spike	886	902	WTFGAGPALQIPFPMQM			13	1891.92	S2_FL_complex	0.167	1893.72	0.053293	0.356954	0.093447	8.80375	0.018937
S2 spike	886	902	WTFGAGPALQIPFPMQM			13	1891.92	S2_FL_complex	1.667	1893.66	0.195221	0.294454	0.20977	8.76998	0.032407
S2 spike	886	902	WTFGAGPALQIPFPMQM			13	1891.92	S2_FL_complex	16.667	1893.67	0.170805	0.305317	0.187261	8.81475	0.013941
S2 spike	886	902	WTFGAGPALQIPFPMQM			13	1891.92	S2_FL_complex	166.667	1893.74	0.077946	0.374599	0.109397	8.75313	0.020047
S2 spike	889	902	GAGPALQIPFPMQM			10	1457.73	S2_3A3Fab_complex	0	1458.71	0.058514	0	0	8.37533	0.008177
S2 spike	889	902	GAGPALQIPFPMQM			10	1457.73	S2_3A3Fab_complex	0.167	1458.98	0.023951	0.265573	0.063226	8.37127	0.003114
S2 spike	889	902	GAGPALQIPFPMQM			10	1457.73	S2_3A3Fab_complex	1.667	1459.13	0.095104	0.419021	0.111663	8.36666	0.01425
S2 spike	889	902	GAGPALQIPFPMQM			10	1457.73	S2_3A3Fab_complex	16.667	1459.11	0.026175	0.396629	0.064102	8.35828	0.002598
S2 spike	889	902	GAGPALQIPFPMQM			10	1457.73	S2_3A3Fab_complex	166.667	1459.12	0.110357	0.414428	0.12491	8.35986	0.016955
S2 spike	889	902	GAGPALQIPFPMQM			10	1457.73	S2_Alone	0	1458.72	0.046413	0	0	8.3753	0.008166
S2 spike	889	902	GAGPALQIPFPMQM			10	1457.73	S2_Alone	0.167	1459.1	0.045324	0.378068	0.064872	8.3567	0.021112
S2 spike	889	902	GAGPALQIPFPMQM			10	1457.73	S2_Alone	1.667	1459.13	0.100623	0.414972	0.110812	8.3585	0.013184
S2 spike	889	902	GAGPALQIPFPMQM			10	1457.73	S2_Alone	16.667	1459.07	0.063177	0.351251	0.078393	8.37388	0.007374
S2 spike	889	902	GAGPALQIPFPMQM			10	1457.73	S2_Alone	166.667	1459.14	0.117152	0.423071	0.126011	8.37464	0.012213
S2 spike	889	902	GAGPALQIPFPMQM			10	1457.73	S2_FL_complex	0	1458.72	0.046413	0	0	8.3753	0.008166
S2 spike	889	902	GAGPALQIPFPMQM			10	1457.73	S2_FL_complex	0.167	1459.06	0.04945	0.340691	0.067819	8.36455	0.013039
S2 spike	889	902	GAGPALQIPFPMQM			10	1457.73	S2_FL_complex	1.667	1459.03	0.015279	0.311314	0.048863	8.35019	0.017302
S2 spike	889	902	GAGPALQIPFPMQM			10	1457.73	S2_FL_complex	16.667	1459	0.029261	0.281026	0.054867	8.36455	0.001671
S2 spike	889	902	GAGPALQIPFPMQM			10	1457.73	S2_FL_complex	166.667	1459.18	0.04423	0.461134	0.064113	8.34147	0.010771
S2 spike	892	902	PALQIPFPMQM			7	1272.65	S2_3A3Fab_complex	0	1272.3	0.030182	0	0	8.04402	0.020225
S2 spike	892	902	PALQIPFPMQM			7	1272.65	S2_3A3Fab_complex	0.167	1273.6	0.03087	1.30544	0.043173	8.06156	0.003421
S2 spike	892	902	PALQIPFPMQM			7	1272.65	S2_3A3Fab_complex	1.667	1274.24	0.06672	1.94043	0.073229	8.05044	0.013198
S2 spike	892	902	PALQIPFPMQM			7	1272.65	S2_3A3Fab_complex	16.667	1274.81	0.096607	2.51681	0.101212	8.04032	0.01177
S2 spike	892	902	PALQIPFPMQM			7	1272.65	S2_3A3Fab_complex	166.667	1275.23	0.079833	2.93314	0.085348	8.05461	0.012174
S2 spike	892	902	PALQIPFPMQM			7	1272.65	S2_Alone	0	1272.31	0.007507	0	0	8.02551	0.002399
S2 spike	892	902	PALQIPFPMQM			7	1272.65	S2_Alone	0.167	1273.67	0.085982	1.35611	0.086309	8.03536	0.017715
S2 spike	892	902	PALQIPFPMQM			7	1272.65	S2_Alone	1.667	1274.19	0.118658	1.87878	0.118895	8.04281	0.016099
S2 spike	892	902	PALQIPFPMQM			7	1272.65	S2_Alone	16.667	1274.81	0.071809	2.4952	0.072201	8.0547	0.008934
S2 spike	892	902	PALQIPFPMQM			7	1272.65	S2_Alone	166.667	1275.26	0.121303	2.95221	0.121535	8.03862	0.019271
S2 spike	892	902	PALQIPFPMQM			7	1272.65	S2_FL_complex	0	1272.35	0.032995	0	0	8.04746	0.019614
S2 spike	892	902	PALQIPFPMQM			7	1272.65	S2_FL_complex	0.167	1273.64	0.019692	1.29324	0.038424	8.05033	0.015745
S2 spike	892	902	PALQIPFPMQM			7	1272.65	S2_FL_complex	1.667	1274.23	0.089016	1.87932	0.094934	8.04861	0.018045
S2 spike	892	902	PALQIPFPMQM			7	1272.65	S2_FL_complex	16.667	1274.82	0.031445	2.46991	0.045579	8.04793	0.013958
S2 spike	892	902	PALQIPFPMQM			7	1272.65	S2_FL_complex	166.667	1275.28	0.066785	2.92708	0.074491	8.0357	0.011477
S2 spike	902	916	MAYRFNGIGVTQNVL			14	1682.87	S2_3A3Fab_complex	0	1684.03	0.050554	0	0	7.60715	0.019321
S2 spike	902	916	MAYRFNGIGVTQNVL			14	1682.87	S2_3A3Fab_complex	0.167	1685.63	0.078104	1.59523	0.093038	7.62975	0.00237
S2 spike	902	916	MAYRFNGIGVTQNVL			14	1682.87	S2_3A3Fab_complex	1.667	1686.71	0.091741	2.67233	0.104748	7.6265	0.011266
S2 spike	902	916	MAYRFNGIGVTQNVL			14	1682.87	S2_3A3Fab_complex	16.667	1687.6	0.10721	3.56191	0.118531	7.61362	0.019306
S2 spike	902	916	MAYRFNGIGVTQNVL			14	1682.87	S2_3A3Fab_complex	166.667	1688.64	0.167076	4.60927	0.174557	7.62702	0.012985
S2 spike	902	916	MAYRFNGIGVTQNVL			14	1682.87	S2_Alone	0	1684.03	0.050554	0	0	7.60715	0.019321
S2 spike	902	916	MAYRFNGIGVTQNVL			14	1682.87	S2_Alone	0.167	1685.73	0.186334	1.69572	0.19307	7.60946	0.018503
S2 spike	902	916	MAYRFNGIGVTQNVL			14	1682.87	S2_Alone	1.667	1686.68	0.137334	2.64484	0.146344	7.61739	0.023218
S2 spike	902	916	MAYRFNGIGVTQNVL			14	1682.87	S2_Alone	16.667	1687.63	0.100781	3.60151	0.11275	7.62811	0.007661
S2 spike	902	916	MAYRFNGIGVTQNVL			14	1682.87	S2_Alone	166.667	1688.59	0.132578	4.55872	0.141889	7.60697	0.023685
S2 spike	902	916	MAYRFNGIGVTQNVL			14	1682.87	S2_FL_complex	0	1684.03	0.050554	0	0	7.60715	0.019321
S2 spike	902	916	MAYRFNGIGVTQNVL			14	1682.87	S2_FL_complex	0.167	1685.67	0.026676	1.63993	0.057161	7.61867	0.021312
S2 spike	902	916	MAYRFNGIGVTQNVL			14	1682.87	S2_FL_complex	1.667	1686.61	0.076071	2.58073	0.091337	7.62388	0.012966
S2 spike	902	916	MAYRFNGIGVTQNVL			14	1682.87	S2_FL_complex	16.667	1687.53	0.027132	3.49328	0.057375	7.61647	0.024526
S2 spike	902	916	MAYRFNGIGVTQNVL			14	1682.87	S2_FL_complex	166.667	1688.7	0.140699	4.66444	0.149506	7.60478	0.011643
S2 spike	903	916	AYRFNGIGVTQNVL			13	1551.83	S2_3A3Fab_complex	0	1553.28	0.103907	0	0	7.50916	0.026516
S2 spike	903	916	AYRFNGIGVTQNVL			13	1551.83	S2_3A3Fab_complex	0.167	1554.44	0.02333	1.15614	0.106494	7.53197	0.002014
S2 spike	903	916	AYRFNGIGVTQNVL			13	1551.83	S2_3A3Fab_complex	1.667	1555.44	0.095351	2.16476	0.141027	7.52382	0.009951
S2 spike	903	916	AYRFNGIGVTQNVL			13	1551.83	S2_3A3Fab_complex	16.667	1556.34	0.077674	3.05882	0.129731	7.50623	0.024802
S2 spike	903	916	AYRFNGIGVTQNVL			13	1551.83	S2_3A3Fab_complex	166.667	1557.28	0.153409	3.99737	0.185286	7.52639	0.016557
S2 spike	903	916	AYRFNGIGVTQNVL			13	1551.83	S2_Alone	0	1553.3	0.086401	0	0	7.50777	0.028162
S2 spike	903	916	AYRFNGIGVTQNVL			13	1551.83	S2_Alone	0.167	1554.45	0.169958	1.14415	0.190658	7.50584	0.024718
S2 spike	903	916	AYRFNGIGVTQNVL			13	1551.83	S2_Alone	1.667	1555.49	0.090335	2.19018	0.125002	7.51367	0.031115
S2 spike	903	916	AYRFNGIGVTQNVL			13	1551.83	S2_Alone	16.667	1556.4	0.062886	3.09887	0.106863	7.52639	0.011643
S2 spike	903	916	AYRFNGIGVTQNVL			13	1551.83	S2_Alone	166.667	1557.28	0.115922	3.97354	0.144578	7.49754	0.028996
S2 spike	903	916	AYRFNGIGVTQNVL			13	1551.83	S2_FL_complex	0	1553.26	0.11653	0	0	7.50807	0.026604
S2 spike	903	916	AYRFNGIGVTQNVL			13	1551.83	S2_FL_complex	0.167	1554.46	0.029445	1.19572	0.120193	7.51955	0.026866
S2 spike	903	916	AYRFNGIGVTQNVL			13	1551.83	S2_FL_complex	1.667	1555.39	0.065532	2.1256	0.133692	7.52385	0.015395
S2 spike	903	916	AYRFNGIGVTQNVL			13	1551.83	S2_FL_complex	16.667	1556.34	0.063385	3.07648	0.132653	7.5175	0.02713
S2 spike	903	916	AYRFNGIGVTQNVL			13	1551.83	S2_FL_complex	166.667	1557.27	0.124983	4.00597	0.17088	7.50047	0.015058
S2 spike	904	916	YRFNGIGVTQNVL			12	1480.79	S2_3A3Fab_complex	0	1481.65	0.040788	0	0	7.50447	0.027288
S2 spike	904	916	YRFNGIGVTQNVL			12	1480.79	S2_3A3Fab_complex	0.167	1483.09	0.030785	1.43123	0.051101	7.53907	0.001376
S2 spike	904	916	YRFNGIGVTQNVL			12	1480.79	S2_3A3Fab_complex	1.667	1484.09	0.083751	2.43326	0.093155	7.52952	0.00989
S2 spike	904	916	YRFNGIGVTQNVL			12	1480.79	S2_3A3Fab_complex	16.667	1484.88	0.091865	3.22937	0.100513	7.5141	0.025649
S2 spike	904	916	YRFNGIGVTQNVL			12	1480.79	S2_3A3Fab_complex	166.667	1485.82	0.132044	4.16396	0.1382	7.53632	0.013947
S2 spike	904	916	YRFNGIGVTQNVL			12	1480.79	S2_Alone	0	1481.65	0.040788	0	0	7.50447	0.027288
S2 spike	904	916	YRFNGIGVTQNVL			12	1480.79	S2_Alone	0.167	1483.18	0.11412	1.5222	0.12119	7.51284	0.024617
S2 spike	904	916	YRFNGIGVTQNVL			12	1480.79	S2_Alone	1.667	1484.07	0.11156	2.41489	0.118783	7.52096	0.033484
S2 spike	904	916	YRFNGIGVTQNVL			12	1480.79	S2_Alone	16.667	1484.89	0.060088	3.23686	0.072624	7.5351	0.010476
S2 spike	904	916	YRFNGIGVTQNVL			12	1480.79	S2_Alone	166.667	1485.8	0.119564	4.14205	0.126329	7.5072	0.032371
S2 spike	904	916	YRFNGIGVTQNVL			12	1480.79	S2_FL_complex	0	1481.65	0.040788	0	0	7.50447	0.027288
S2 spike	904	916	YRFNGIGVTQNVL			12	1480.79	S2_FL_complex	0.167	1483.15	0.042765	1.49472	0.059098	7.52515	0.027893
S2 spike	904	916	YRFNGIGVTQNVL			12	1480.79	S2_FL_complex	1.667	1483.99	0.048057	2.33582	0.063033	7.53101	0.016787
S2 spike	904	916	YRFNGIGVTQNVL			12	1480.79	S2_FL_complex	16.667	1484.85	0.01814	3.19392	0.04464	7.51993	0.028014
S2 spike	904	916	YRFNGIGVTQNVL			12	1480.79	S2_FL_complex	166.667	1485.84	0.112814	4.18849	0.119961	7.50601	0.014582
S2 spike	905	916	RFNGIGVTQNVL			11	1317.73	S2_3A3Fab_complex	0	1318.32	0.047791	0	0	7.29938	0.031743
S2 spike	905	916	RFNGIGVTQNVL			11	1317.73	S2_3A3Fab_complex	0.167	1319.75	0.093448	1.42319	0.10496	7.33198	0.001341
S2 spike	905	916	RFNGIGVTQNVL			11	1317.73	S2_3A3Fab_complex	1.667	1320.45	0.021268	2.13042	0.052309	7.33681	0.004247
S2 spike	905	916	RFNGIGVTQNVL			11	1317.73	S2_3A3Fab_complex	16.667	1321.31	0.102821	2.9928	0.113385	7.29852	0.03301
S2 spike	905	916	RFNGIGVTQNVL			11	1317.73	S2_3A3Fab_complex	166.667	1322.53	0.024976	4.20904	0.053923	7.32889	0.002226
S2 spike	905	916	RFNGIGVTQNVL			11	1317.73	S2_Alone	0	1318.32	0.047791	0	0	7.29938	0.031743
S2 spike	905	916	RFNGIGVTQNVL			11	1317.73	S2_Alone	0.167	1319.79	0.097226	1.46695	0.108336	7.30949	0.024232
S2 spike	905	916	RFNGIGVTQNVL			11	1317.73	S2_Alone	1.667	1320.59	0.107629	2.26939	0.117762	7.31485	0.038307
S2 spike	905	916	RFNGIGVTQNVL			11	1317.73	S2_Alone	16.667	1321.42	0.176184	3.09395	0.182551	7.32984	0.009123
S2 spike	905	916	RFNGIGVTQNVL			11	1317.73	S2_Alone	166.667	1322.45	0.132862	4.12777	0.141196	7.29926	0.037574
S2 spike	905	916	RFNGIGVTQNVL			11	1317.73	S2_FL_complex	0	1318.32	0.047791	0	0	7.29938	0.031743
S2 spike	905	916	RFNGIGVTQNVL			11	1317.73	S2_FL_complex	0.167	1319.85	0.127032	1.53147	0.135724	7.31565	0.030611
S2 spike	905	916	RFNGIGVTQNVL			11	1317.73	S2_FL_complex	1.667	1320.5	0.175156	2.17853	0.181558	7.3237	0.016673
S2 spike	905	916	RFNGIGVTQNVL			11	1317.73	S2_FL_complex	16.667	1321.29	0.039799	2.97283	0.062192	7.33727	0.002186
S2 spike	905	916	RFNGIGVTQNVL			11	1317.73	S2_FL_complex	166.667	1322.35	0.118339	4.02826	0.127625	7.32128	0.017789
S2 spike	917	926	YENQKLIANQ			9	1220.63	S2_3A3Fab_complex	0	1221.22	0.029218	0	0	6.1241	0.048989
S2 spike	917	926	YENQKLIANQ			9	1220.63	S2_3A3Fab_complex	0.167	1222.7	0.067339	1.47898	0.073405	6.20108	0.002155
S2 spike	917	926	YENQKLIANQ			9	1220.63	S2_3A3Fab_complex	1.667	1223.31	0.086197	2.08239	0.091014	6.20029	0.004969
S2 spike	917	926	YENQKLIANQ			9	1220.63	S2_3A3Fab_complex	16.667	1223.64	0.11786	2.41373	0.121428	6.16139	0.051483
S2 spike	917	926	YENQKLIANQ			9	1220.63	S2_3A3Fab_complex	166.667	1224.25	0.056225	3.02165	0.063363	6.19455	0.0051
S2 spike	917	926	YENQKLIANQ			9	1220.63	S2_Alone	0	1221.22	0.029218	0	0	6.1241	0.048989
S2 spike	917	926	YENQKLIANQ			9	1220.63	S2_Alone	0.167	1222.75	0.079544	1.52489	0.08474	6.15695	0.048588
S2 spike	917	926	YENQKLIANQ			9	1220.63	S2_Alone	1.667	1223.24	0.072903	2.01624	0.07854	6.16457	0.063026
S2 spike	917	926	YENQKLIANQ			9	1220.63	S2_Alone	16.667	1223.71	0.078574	2.48093	0.08383	6.19009	0.005559
S2 spike	917	926	YENQKLIANQ			9	1220.63	S2_Alone	166.667	1224.26	0.122914	3.03748	0.126339	6.13732	0.058123
S2 spike	917	926	YENQKLIANQ			9	1220.63	S2_FL_complex	0	1221.22	0.029218	0	0	6.1241	0.048989
S2 spike	917	926	YENQKLIANQ			9	1220.63	S2_FL_complex	0.167	1222.69	0.079309	1.46485	0.08452	6.15467	0.04701
S2 spike	917	926	YENQKLIANQ			9	1220.63	S2_FL_complex	1.667	1223.22	0.100988	1.99479	0.10513	6.19758	0.011489
S2 spike	917	926	YENQKLIANQ			9	1220.63	S2_FL_complex	16.667	1223.68	0.119686	2.45454	0.123201	6.16969	0.056246
S2 spike	917	926	YENQKLIANQ			9	1220.63	S2_FL_complex	166.667	1224.23	0.135426	3.00619	0.138542	6.16475	0.039016
S2 spike	917	927	YENQKLIANQF			10	1367.7	S2_3A3Fab_complex	0	1368.58	0.019835	0	0	7.08575	0.031335
S2 spike	917	927	YENQKLIANQF			10	1367.7	S2_3A3Fab_complex	0.167	1370.01	0.038965	1.42785	0.043723	7.12808	0.002316
S2 spike	917	927	YENQKLIANQF			10	1367.7	S2_3A3Fab_complex	1.667	1370.65	0.031437	2.06615	0.037171	7.12556	0.007797
S2 spike	917	927	YENQKLIANQF			10	1367.7	S2_3A3Fab_complex	16.667	1371.09	0.09414	2.50778	0.096206	7.0968	0.031599
S2 spike	917	927	YENQKLIANQF			10	1367.7	S2_3A3Fab_complex	166.667	1371.72	0.042352	3.14257	0.046767	7.12546	0.014159
S2 spike	917	927	YENQKLIANQF			10	1367.7	S2_Alone	0	1368.58	0.019835	0	0	7.08575	0.031335
S2 spike	917	927	YENQKLIANQF			10	1367.7	S2_Alone	0.167	1370.07	0.074991	1.48476	0.07757	7.10127	0.027745
S2 spike	917	927	YENQKLIANQF			10	1367.7	S2_Alone	1.667	1370.63	0.062237	2.04791	0.065321	7.10617	0.041631
S2 spike	917	927	YENQKLIANQF			10	1367.7	S2_Alone	16.667	1371.08	0.08967	2.50288	0.091837	7.12738	0.011442
S2 spike	917	927	YENQKLIANQF			10	1367.7	S2_Alone	166.667	1371.81	0.118441	3.2323	0.12009	7.08909	0.03491
S2 spike	917	927	YENQKLIANQF			10	1367.7	S2_FL_complex	0	1368.58	0.019835	0	0	7.08575	0.031335
S2 spike	917	927	YENQKLIANQF			10	1367.7	S2_FL_complex	0.167	1370.1	0.026845	1.51662	0.033378	7.10994	0.037049
S2 spike	917	927	YENQKLIANQF			10	1367.7	S2_FL_complex	1.667	1370.68	0.069793	2.09898	0.072557	7.12003	0.013306
S2 spike	917	927	YENQKLIANQF			10	1367.7	S2_FL_complex	16.667	1371.15	0.088353	2.56945	0.090552	7.10278	0.038849
S2 spike	917	927	YENQKLIANQF			10	1367.7	S2_FL_complex	166.667	1371.84	0.163787	3.25748	0.164984	7.09497	0.020775
S2 spike	917	938	YENQKLIANQFNSAIGKIQDSL			21	2494.29	S2_3A3Fab_complex	0	2495.74	0.013902	0	0	7.89049	0.006645
S2 spike	917	938	YENQKLIANQFNSAIGKIQDSL			21	2494.29	S2_3A3Fab_complex	0.167	2500.32	0.122409	4.57649	0.123196	7.91014	0.003053
S2 spike	917	938	YENQKLIANQFNSAIGKIQDSL			21	2494.29	S2_3A3Fab_complex	1.667	2502.29	0.245237	6.54659	0.24563	7.90427	0.00938
S2 spike	917	938	YENQKLIANQFNSAIGKIQDSL			21	2494.29	S2_3A3Fab_complex	16.667	2503.64	0.298298	7.8972	0.298621	7.87893	0.014759
S2 spike	917	938	YENQKLIANQFNSAIGKIQDSL			21	2494.29	S2_3A3Fab_complex	166.667	2504.8	0.082942	9.05354	0.084099	7.88914	0.00628
S2 spike	917	938	YENQKLIANQFNSAIGKIQDSL			21	2494.29	S2_Alone	0	2495.74	0.013902	0	0	7.89049	0.006645
S2 spike	917	938	YENQKLIANQFNSAIGKIQDSL			21	2494.29	S2_Alone	0.167	2500.45	0.191815	4.7042	0.192318	7.88636	0.006979
S2 spike	917	938	YENQKLIANQFNSAIGKIQDSL			21	2494.29	S2_Alone	1.667	2502.33	0.182034	6.5853	0.182564	7.87844	0.018912
S2 spike	917	938	YENQKLIANQFNSAIGKIQDSL			21	2494.29	S2_Alone	16.667	2503.46	0.196071	7.71041	0.196563	7.89604	0.005917
S2 spike	917	938	YENQKLIANQFNSAIGKIQDSL			21	2494.29	S2_Alone	166.667	2505.01	0.252109	9.26837	0.252492	7.86495	0.013087
S2 spike	917	938	YENQKLIANQFNSAIGKIQDSL			21	2494.29	S2_FL_complex	0	2495.74	0.013902	0	0	7.89049	0.006645
S2 spike	917	938	YENQKLIANQFNSAIGKIQDSL			21	2494.29	S2_FL_complex	0.167	2500.43	0.129344	4.68224	0.130089	7.89532	0.014803
S2 spike	917	938	YENQKLIANQFNSAIGKIQDSL			21	2494.29	S2_FL_complex	1.667	2502.35	0.327052	6.6049	0.327347	7.89262	0.016268
S2 spike	917	938	YENQKLIANQFNSAIGKIQDSL			21	2494.29	S2_FL_complex	16.667	2503.58	0.075675	7.83228	0.076942	7.88197	0.017488
S2 spike	917	938	YENQKLIANQFNSAIGKIQDSL			21	2494.29	S2_FL_complex	166.667	2504.88	0.16704	9.13416	0.167618	7.87505	0.004905
S2 spike	923	930	IANQFNSA			7	864.421	S2_3A3Fab_complex	0	864.809	0.017193	0	0	6.52044	0.046756
S2 spike	923	930	IANQFNSA			7	864.421	S2_3A3Fab_complex	0.167	865.103	0.046764	0.293906	0.049825	6.5873	0.003697
S2 spike	923	930	IANQFNSA			7	864.421	S2_3A3Fab_complex	1.667	865.361	0.028893	0.552169	0.033621	6.58753	0.005935
S2 spike	923	930	IANQFNSA			7	864.421	S2_3A3Fab_complex	16.667	865.887	0.078841	1.0783	0.080694	6.54893	0.052177
S2 spike	923	930	IANQFNSA			7	864.421	S2_3A3Fab_complex	166.667	866.72	0.030987	1.91118	0.035437	6.59151	0.012746
S2 spike	923	930	IANQFNSA			7	864.421	S2_Alone	0	864.809	0.017193	0	0	6.52044	0.046756
S2 spike	923	930	IANQFNSA			7	864.421	S2_Alone	0.167	865.158	0.065342	0.348705	0.067566	6.54805	0.046127
S2 spike	923	930	IANQFNSA			7	864.421	S2_Alone	1.667	865.325	0.067037	0.515947	0.069207	6.55251	0.06235
S2 spike	923	930	IANQFNSA			7	864.421	S2_Alone	16.667	865.906	0.076752	1.09692	0.078654	6.58855	0.011973
S2 spike	923	930	IANQFNSA			7	864.421	S2_Alone	166.667	866.777	0.072154	1.96768	0.074175	6.52025	0.05261
S2 spike	923	930	IANQFNSA			7	864.421	S2_FL_complex	0	864.809	0.017193	0	0	6.52044	0.046756
S2 spike	923	930	IANQFNSA			7	864.421	S2_FL_complex	0.167	865.154	0.031242	0.344705	0.035661	6.5609	0.052447
S2 spike	923	930	IANQFNSA			7	864.421	S2_FL_complex	1.667	865.25	0.049132	0.441183	0.052053	6.58939	0.016133
S2 spike	923	930	IANQFNSA			7	864.421	S2_FL_complex	16.667	865.847	0.088061	1.03743	0.089723	6.55677	0.056206
S2 spike	923	930	IANQFNSA			7	864.421	S2_FL_complex	166.667	866.678	0.082669	1.86867	0.084438	6.55305	0.041465
S2 spike	923	938	IANQFNSAIGKIQDSL			15	1718.91	S2_3A3Fab_complex	0	1719.87	0.026222	0	0	7.73428	0.019102
S2 spike	923	938	IANQFNSAIGKIQDSL			15	1718.91	S2_3A3Fab_complex	0.167	1722.73	0.023213	2.85728	0.035021	7.75468	0.002365
S2 spike	923	938	IANQFNSAIGKIQDSL			15	1718.91	S2_3A3Fab_complex	1.667	1724.11	0.039762	4.2367	0.04763	7.74404	0.008799
S2 spike	923	938	IANQFNSAIGKIQDSL			15	1718.91	S2_3A3Fab_complex	16.667	1724.89	0.108752	5.01938	0.111869	7.72921	0.018854
S2 spike	923	938	IANQFNSAIGKIQDSL			15	1718.91	S2_3A3Fab_complex	166.667	1725.64	0.095428	5.76806	0.098965	7.74233	0.011158
S2 spike	923	938	IANQFNSAIGKIQDSL			15	1718.91	S2_Alone	0	1719.87	0.026222	0	0	7.73428	0.019102
S2 spike	923	938	IANQFNSAIGKIQDSL			15	1718.91	S2_Alone	0.167	1722.77	0.091237	2.89575	0.094931	7.73304	0.018843
S2 spike	923	938	IANQFNSAIGKIQDSL			15	1718.91	S2_Alone	1.667	1724.07	0.147548	4.19391	0.14986	7.73384	0.024272
S2 spike	923	938	IANQFNSAIGKIQDSL			15	1718.91	S2_Alone	16.667	1724.88	0.105844	5.00183	0.109044	7.7442	0.008337
S2 spike	923	938	IANQFNSAIGKIQDSL			15	1718.91	S2_Alone	166.667	1725.76	0.113312	5.88371	0.116306	7.71882	0.021826
S2 spike	923	938	IANQFNSAIGKIQDSL			15	1718.91	S2_FL_complex	0	1719.87	0.026222	0	0	7.73428	0.019102
S2 spike	923	938	IANQFNSAIGKIQDSL			15	1718.91	S2_FL_complex	0.167	1722.81	0.051466	2.94091	0.057761	7.74304	0.020076
S2 spike	923	938	IANQFNSAIGKIQDSL			15	1718.91	S2_FL_complex	1.667	1724.05	0.071274	4.18086	0.075945	7.74484	0.010767
S2 spike	923	938	IANQFNSAIGKIQDSL			15	1718.91	S2_FL_complex	16.667	1724.87	0.035174	5.00091	0.043873	7.73125	0.021541
S2 spike	923	938	IANQFNSAIGKIQDSL			15	1718.91	S2_FL_complex	166.667	1725.75	0.112174	5.87757	0.115198	7.72298	0.011649
S2 spike	923	945	IANQFNSAIGKIQDSLSSTPSAL			21	2362.22	S2_3A3Fab_complex	0	2363.62	0.047659	0	0	7.82713	0.016863
S2 spike	923	945	IANQFNSAIGKIQDSLSSTPSAL			21	2362.22	S2_3A3Fab_complex	0.167	2369.85	0.045228	6.22915	0.065703	7.85445	0.002599
S2 spike	923	945	IANQFNSAIGKIQDSLSSTPSAL			21	2362.22	S2_3A3Fab_complex	1.667	2371.46	0.185879	7.84021	0.191891	7.84067	0.010672
S2 spike	923	945	IANQFNSAIGKIQDSLSSTPSAL			21	2362.22	S2_3A3Fab_complex	16.667	2372.3	0.111384	8.67689	0.121152	7.81679	0.016532
S2 spike	923	945	IANQFNSAIGKIQDSLSSTPSAL			21	2362.22	S2_3A3Fab_complex	166.667	2372.8	0.32723	9.17489	0.330682	7.83413	0.013045
S2 spike	923	945	IANQFNSAIGKIQDSLSSTPSAL			21	2362.22	S2_Alone	0	2363.62	0.047659	0	0	7.82713	0.016863
[truncated: 879 more rows]

## Sheet: 3A3 IgG with Spike
Protein	Start	End	Sequence	Modification	Fragment	MaxUptake	MHP	State	Exposure	Center	Center SD	Uptake	Uptake SD	RT	RT SD
3A3_Heavy	5	11	QQSGAEL			6	732.352	FL_Alone	0	732.853	0.040941	0	0	5.97959	0.005265
3A3_Heavy	5	11	QQSGAEL			6	732.352	FL_Alone	0.167	734.667	0.006005	1.81421	0.041379	5.97387	0.007932
3A3_Heavy	5	11	QQSGAEL			6	732.352	FL_Alone	1.667	735.116	0.038541	2.26292	0.056228	5.97957	0.004653
3A3_Heavy	5	11	QQSGAEL			6	732.352	FL_Alone	16.667	735.338	0.058161	2.48524	0.071126	5.97597	0.006177
3A3_Heavy	5	11	QQSGAEL			6	732.352	FL_S2_Complex	0	732.853	0.040941	0	0	5.97959	0.005265
3A3_Heavy	5	11	QQSGAEL			6	732.352	FL_S2_Complex	0.167	734.668	0.049482	1.81574	0.064224	5.97438	0.003412
3A3_Heavy	5	11	QQSGAEL			6	732.352	FL_S2_Complex	1.667	735.106	0.031409	2.25358	0.051601	5.97843	0.006299
3A3_Heavy	5	11	QQSGAEL			6	732.352	FL_S2_Complex	16.667	735.324	0.041464	2.47092	0.05827	5.98103	0.005925
3A3_Heavy	5	17	QQSGAELLKPGAS			11	1285.67	FL_Alone	0	1286.32	0.00729	0	0	5.90539	0.005662
3A3_Heavy	5	17	QQSGAELLKPGAS			11	1285.67	FL_Alone	0.167	1288.73	0.027962	2.40796	0.028896	5.90511	0.003181
3A3_Heavy	5	17	QQSGAELLKPGAS			11	1285.67	FL_Alone	1.667	1289.97	0.080089	3.64731	0.08042	5.90714	0.004505
3A3_Heavy	5	17	QQSGAELLKPGAS			11	1285.67	FL_Alone	16.667	1290.99	0.090569	4.67412	0.090862	5.90287	0.006806
3A3_Heavy	5	17	QQSGAELLKPGAS			11	1285.67	FL_S2_Complex	0	1286.32	0.00729	0	0	5.90539	0.005662
3A3_Heavy	5	17	QQSGAELLKPGAS			11	1285.67	FL_S2_Complex	0.167	1288.68	0.097456	2.35856	0.097728	5.9012	0.001137
3A3_Heavy	5	17	QQSGAELLKPGAS			11	1285.67	FL_S2_Complex	1.667	1290	0.035605	3.67884	0.036344	5.90085	0.005303
3A3_Heavy	5	17	QQSGAELLKPGAS			11	1285.67	FL_S2_Complex	16.667	1291.02	0.065544	4.6993	0.065948	5.89745	0.004181
3A3_Heavy	10	17	ELLKPGAS			6	814.467	FL_Alone	0	814.889	0.025142	0	0	5.57922	0.006122
3A3_Heavy	10	17	ELLKPGAS			6	814.467	FL_Alone	0.167	815.373	0.0226	0.483847	0.033807	5.57943	0.001964
3A3_Heavy	10	17	ELLKPGAS			6	814.467	FL_Alone	1.667	816.186	0.022309	1.29649	0.033613	5.57998	0.003277
3A3_Heavy	10	17	ELLKPGAS			6	814.467	FL_Alone	16.667	816.927	0.04104	2.03763	0.048129	5.57646	0.003359
3A3_Heavy	10	17	ELLKPGAS			6	814.467	FL_S2_Complex	0	814.889	0.025142	0	0	5.57922	0.006122
3A3_Heavy	10	17	ELLKPGAS			6	814.467	FL_S2_Complex	0.167	815.316	0.03467	0.426735	0.042827	5.57542	0.003338
3A3_Heavy	10	17	ELLKPGAS			6	814.467	FL_S2_Complex	1.667	816.177	0.028825	1.28769	0.038249	5.57822	0.006758
3A3_Heavy	10	17	ELLKPGAS			6	814.467	FL_S2_Complex	16.667	816.938	0.032568	2.04854	0.041144	5.5763	0.004955
3A3_Heavy	11	17	LLKPGAS			5	685.424	FL_Alone	0	686.225	0.026153	0	0	5.00768	0.011006
3A3_Heavy	11	17	LLKPGAS			5	685.424	FL_Alone	0.167	686.573	0.01598	0.347947	0.030648	5.00271	0.003053
3A3_Heavy	11	17	LLKPGAS			5	685.424	FL_Alone	1.667	687.252	0.030413	1.02742	0.040111	5.00757	0.006947
3A3_Heavy	11	17	LLKPGAS			5	685.424	FL_Alone	16.667	687.94	0.039378	1.71478	0.047272	5.00437	0.00853
3A3_Heavy	11	17	LLKPGAS			5	685.424	FL_S2_Complex	0	686.225	0.026153	0	0	5.00768	0.011006
3A3_Heavy	11	17	LLKPGAS			5	685.424	FL_S2_Complex	0.167	686.563	0.049243	0.338616	0.055757	5.00357	0.004039
3A3_Heavy	11	17	LLKPGAS			5	685.424	FL_S2_Complex	1.667	687.259	0.023274	1.03397	0.035009	5.00523	0.004893
3A3_Heavy	11	17	LLKPGAS			5	685.424	FL_S2_Complex	16.667	687.938	0.034558	1.71311	0.043339	5.00929	0.004611
3A3_Heavy	28	46	NIKDTYIHWLKQRPEQGLE			17	2368.24	FL_Alone	0	2369.57	0.022387	0	0	6.91843	0.008269
3A3_Heavy	28	46	NIKDTYIHWLKQRPEQGLE			17	2368.24	FL_Alone	0.167	2372.38	0.027975	2.81538	0.03583	6.92228	0.007449
3A3_Heavy	28	46	NIKDTYIHWLKQRPEQGLE			17	2368.24	FL_Alone	1.667	2373.57	0.07501	4.00055	0.078279	6.92009	0.00406
3A3_Heavy	28	46	NIKDTYIHWLKQRPEQGLE			17	2368.24	FL_Alone	16.667	2374.34	0.046586	4.77181	0.051686	6.9124	0.005467
3A3_Heavy	28	46	NIKDTYIHWLKQRPEQGLE			17	2368.24	FL_S2_Complex	0	2369.57	0.022387	0	0	6.91843	0.008269
3A3_Heavy	28	46	NIKDTYIHWLKQRPEQGLE			17	2368.24	FL_S2_Complex	0.167	2372.32	0.045056	2.74663	0.050311	6.91589	0.004776
3A3_Heavy	28	46	NIKDTYIHWLKQRPEQGLE			17	2368.24	FL_S2_Complex	1.667	2373.42	0.035775	3.8533	0.042203	6.92418	0.006174
3A3_Heavy	28	46	NIKDTYIHWLKQRPEQGLE			17	2368.24	FL_S2_Complex	16.667	2374.23	0.041825	4.65734	0.04744	6.91453	0.005961
3A3_Heavy	34	45	IHWLKQRPEQGL			10	1504.84	FL_Alone	0	1505.87	0.015928	0	0	6.17221	0.008891
3A3_Heavy	34	45	IHWLKQRPEQGL			10	1504.84	FL_Alone	0.167	1507.49	0.014507	1.61557	0.021544	6.17341	0.010587
3A3_Heavy	34	45	IHWLKQRPEQGL			10	1504.84	FL_Alone	1.667	1507.99	0.03983	2.11426	0.042897	6.16915	0.003314
3A3_Heavy	34	45	IHWLKQRPEQGL			10	1504.84	FL_Alone	16.667	1508.57	0.060602	2.69998	0.06266	6.16275	0.004303
3A3_Heavy	34	45	IHWLKQRPEQGL			10	1504.84	FL_S2_Complex	0	1505.87	0.015928	0	0	6.17221	0.008891
3A3_Heavy	34	45	IHWLKQRPEQGL			10	1504.84	FL_S2_Complex	0.167	1507.44	0.078452	1.56264	0.080053	6.15558	0.004295
3A3_Heavy	34	45	IHWLKQRPEQGL			10	1504.84	FL_S2_Complex	1.667	1507.96	0.056295	2.08675	0.058505	6.16031	0.008885
3A3_Heavy	34	45	IHWLKQRPEQGL			10	1504.84	FL_S2_Complex	16.667	1508.53	0.036201	2.65624	0.03955	6.15785	0.008364
3A3_Heavy	37	45	LKQRPEQGL			7	1068.62	FL_Alone	0	1069.24	0.012928	0	0	5.13909	0.003753
3A3_Heavy	37	45	LKQRPEQGL			7	1068.62	FL_Alone	0.167	1070.93	0.017949	1.6934	0.02212	5.13311	0.002093
3A3_Heavy	37	45	LKQRPEQGL			7	1068.62	FL_Alone	1.667	1071.43	0.029641	2.18633	0.032338	5.14514	0.005072
3A3_Heavy	37	45	LKQRPEQGL			7	1068.62	FL_Alone	16.667	1071.98	0.051715	2.74113	0.053307	5.143	0.003896
3A3_Heavy	37	45	LKQRPEQGL			7	1068.62	FL_S2_Complex	0	1069.24	0.012928	0	0	5.13909	0.003753
3A3_Heavy	37	45	LKQRPEQGL			7	1068.62	FL_S2_Complex	0.167	1070.9	0.04189	1.66477	0.043839	5.13678	0.002192
3A3_Heavy	37	45	LKQRPEQGL			7	1068.62	FL_S2_Complex	1.667	1071.4	0.036709	2.16401	0.038919	5.13792	0.007532
3A3_Heavy	37	45	LKQRPEQGL			7	1068.62	FL_S2_Complex	16.667	1071.98	0.022867	2.74478	0.026268	5.13795	0.007038
3A3_Heavy	37	46	LKQRPEQGLE			8	1197.66	FL_Alone	0	1198.22	0.021393	0	0	5.0168	0.005946
3A3_Heavy	37	46	LKQRPEQGLE			8	1197.66	FL_Alone	0.167	1199.93	0.025884	1.70874	0.03358	5.01315	0.001061
3A3_Heavy	37	46	LKQRPEQGLE			8	1197.66	FL_Alone	1.667	1200.44	0.062148	2.22099	0.065727	5.02156	0.008523
3A3_Heavy	37	46	LKQRPEQGLE			8	1197.66	FL_Alone	16.667	1201	0.042488	2.78153	0.04757	5.01646	0.007198
3A3_Heavy	37	46	LKQRPEQGLE			8	1197.66	FL_S2_Complex	0	1198.22	0.021393	0	0	5.0168	0.005946
3A3_Heavy	37	46	LKQRPEQGLE			8	1197.66	FL_S2_Complex	0.167	1199.88	0.053096	1.65861	0.057243	5.01815	0.004035
3A3_Heavy	37	46	LKQRPEQGLE			8	1197.66	FL_S2_Complex	1.667	1200.42	0.040667	2.20387	0.045951	5.01671	0.007335
3A3_Heavy	37	46	LKQRPEQGLE			8	1197.66	FL_S2_Complex	16.667	1200.96	0.040799	2.74782	0.046067	5.01986	0.003185
3A3_Heavy	38	45	KQRPEQGL			6	955.532	FL_Alone	0	955.826	0.014269	0	0	5.14208	0.005372
3A3_Heavy	38	45	KQRPEQGL			6	955.532	FL_Alone	0.167	957.579	0.019619	1.75331	0.024259	5.13581	0.001775
3A3_Heavy	38	45	KQRPEQGL			6	955.532	FL_Alone	1.667	958.046	0.026516	2.22005	0.030111	5.14664	0.004111
3A3_Heavy	38	45	KQRPEQGL			6	955.532	FL_Alone	16.667	958.61	0.04248	2.78437	0.044813	5.14425	0.003343
3A3_Heavy	38	45	KQRPEQGL			6	955.532	FL_S2_Complex	0	955.826	0.014269	0	0	5.14208	0.005372
3A3_Heavy	38	45	KQRPEQGL			6	955.532	FL_S2_Complex	0.167	957.497	0.045167	1.67187	0.047367	5.13719	0.002624
3A3_Heavy	38	45	KQRPEQGL			6	955.532	FL_S2_Complex	1.667	957.96	0.027488	2.13402	0.030971	5.14015	0.007259
3A3_Heavy	38	45	KQRPEQGL			6	955.532	FL_S2_Complex	16.667	958.592	0.050092	2.76696	0.052085	5.13952	0.008235
3A3_Heavy	59	80	IYAPKFQGKATITTDTSSNTAY			20	2378.19	FL_Alone	0	2379.74	0.145186	0	0	6.24305	0.003956
3A3_Heavy	59	80	IYAPKFQGKATITTDTSSNTAY			20	2378.19	FL_Alone	0.167	2384.03	0.145738	4.2905	0.205715	6.24515	0.00503
3A3_Heavy	59	80	IYAPKFQGKATITTDTSSNTAY			20	2378.19	FL_Alone	1.667	2385.03	0.123865	5.29452	0.190844	6.24959	0.007028
3A3_Heavy	59	80	IYAPKFQGKATITTDTSSNTAY			20	2378.19	FL_Alone	16.667	2385.96	0.203455	6.22588	0.249946	6.24569	0.005165
3A3_Heavy	59	80	IYAPKFQGKATITTDTSSNTAY			20	2378.19	FL_S2_Complex	0	2379.74	0.145186	0	0	6.24305	0.003956
3A3_Heavy	59	80	IYAPKFQGKATITTDTSSNTAY			20	2378.19	FL_S2_Complex	0.167	2384.2	0.141349	4.46799	0.202629	6.24688	0.006586
3A3_Heavy	59	80	IYAPKFQGKATITTDTSSNTAY			20	2378.19	FL_S2_Complex	1.667	2384.97	0.177328	5.2343	0.229181	6.2482	0.005813
3A3_Heavy	59	80	IYAPKFQGKATITTDTSSNTAY			20	2378.19	FL_S2_Complex	16.667	2385.95	0.027429	6.21489	0.147754	6.24418	0.003093
3A3_Heavy	67	80	KATITTDTSSNTAY			13	1473.71	FL_Alone	0	1474.74	0.035849	0	0	5.60651	0.005171
3A3_Heavy	67	80	KATITTDTSSNTAY			13	1473.71	FL_Alone	0.167	1477.13	0.047226	2.38461	0.059291	5.60081	0.010155
3A3_Heavy	67	80	KATITTDTSSNTAY			13	1473.71	FL_Alone	1.667	1477.71	0.056702	2.96895	0.067084	5.60301	0.005629
3A3_Heavy	67	80	KATITTDTSSNTAY			13	1473.71	FL_Alone	16.667	1478.04	0.068092	3.29261	0.076952	5.60413	0.005223
3A3_Heavy	67	80	KATITTDTSSNTAY			13	1473.71	FL_S2_Complex	0	1474.74	0.035849	0	0	5.60651	0.005171
3A3_Heavy	67	80	KATITTDTSSNTAY			13	1473.71	FL_S2_Complex	0.167	1477.14	0.081944	2.39037	0.089443	5.60034	0.004067
3A3_Heavy	67	80	KATITTDTSSNTAY			13	1473.71	FL_S2_Complex	1.667	1477.72	0.032769	2.9705	0.04857	5.60206	0.006975
3A3_Heavy	67	80	KATITTDTSSNTAY			13	1473.71	FL_S2_Complex	16.667	1478.02	0.032353	3.27751	0.04829	5.60288	0.005213
3A3_Heavy	72	80	TDTSSNTAY			8	959.395	FL_Alone	0	959.957	0.038118	0	0	5.51066	0.006768
3A3_Heavy	72	80	TDTSSNTAY			8	959.395	FL_Alone	0.167	961.46	0.006522	1.50307	0.038672	5.50456	0.004652
3A3_Heavy	72	80	TDTSSNTAY			8	959.395	FL_Alone	1.667	961.443	0.044013	1.48588	0.058225	5.51469	0.006722
3A3_Heavy	72	80	TDTSSNTAY			8	959.395	FL_Alone	16.667	961.506	0.04293	1.54891	0.05741	5.51	0.008724
3A3_Heavy	72	80	TDTSSNTAY			8	959.395	FL_S2_Complex	0	959.957	0.038118	0	0	5.51066	0.006768
3A3_Heavy	72	80	TDTSSNTAY			8	959.395	FL_S2_Complex	0.167	961.382	0.047168	1.4252	0.060645	5.5066	0.001075
3A3_Heavy	72	80	TDTSSNTAY			8	959.395	FL_S2_Complex	1.667	961.411	0.031276	1.45396	0.049307	5.50937	0.0053
3A3_Heavy	72	80	TDTSSNTAY			8	959.395	FL_S2_Complex	16.667	961.473	0.021101	1.51608	0.043568	5.50932	0.003363
3A3_Heavy	73	80	DTSSNTAY			7	858.348	FL_Alone	0	858.97	0.039431	0	0	5.5694	0.008929
3A3_Heavy	73	80	DTSSNTAY			7	858.348	FL_Alone	0.167	859.923	0.016018	0.952151	0.04256	5.5667	0.003111
3A3_Heavy	73	80	DTSSNTAY			7	858.348	FL_Alone	1.667	859.93	0.029213	0.959314	0.049074	5.57042	0.00393
3A3_Heavy	73	80	DTSSNTAY			7	858.348	FL_Alone	16.667	859.985	0.036485	1.01408	0.053721	5.56626	0.002397
3A3_Heavy	73	80	DTSSNTAY			7	858.348	FL_S2_Complex	0	858.97	0.039431	0	0	5.5694	0.008929
3A3_Heavy	73	80	DTSSNTAY			7	858.348	FL_S2_Complex	0.167	859.849	0.044718	0.878124	0.059619	5.56305	0.00309
3A3_Heavy	73	80	DTSSNTAY			7	858.348	FL_S2_Complex	1.667	859.857	0.014118	0.886062	0.041883	5.5682	0.007056
3A3_Heavy	73	80	DTSSNTAY			7	858.348	FL_S2_Complex	16.667	859.937	0.016042	0.966296	0.042569	5.56807	0.004624
3A3_Heavy	81	86	LQLSSL			5	660.393	FL_Alone	0	661.066	0.048598	0	0	7.43258	0.002768
3A3_Heavy	81	86	LQLSSL			5	660.393	FL_Alone	0.167	661.793	0.027225	0.727579	0.055704	7.44192	0.00695
3A3_Heavy	81	86	LQLSSL			5	660.393	FL_Alone	1.667	662.214	0.01761	1.14871	0.05169	7.43244	0.004939
3A3_Heavy	81	86	LQLSSL			5	660.393	FL_Alone	16.667	662.614	0.033248	1.54832	0.058882	7.42787	0.004653
3A3_Heavy	81	86	LQLSSL			5	660.393	FL_S2_Complex	0	661.066	0.048598	0	0	7.43258	0.002768
3A3_Heavy	81	86	LQLSSL			5	660.393	FL_S2_Complex	0.167	661.729	0.022331	0.663207	0.053483	7.43239	0.002601
3A3_Heavy	81	86	LQLSSL			5	660.393	FL_S2_Complex	1.667	662.147	0.029986	1.08123	0.057104	7.43379	0.006863
3A3_Heavy	81	86	LQLSSL			5	660.393	FL_S2_Complex	16.667	662.632	0.01347	1.56616	0.05043	7.43001	0.003394
3A3_Heavy	84	89	SSLTSE			5	623.288	FL_Alone	0	623.667	0.038389	0	0	5.40725	0.00811
3A3_Heavy	84	89	SSLTSE			5	623.288	FL_Alone	0.167	624.876	0.003754	1.20842	0.038572	5.40103	0.004271
3A3_Heavy	84	89	SSLTSE			5	623.288	FL_Alone	1.667	625.06	0.045832	1.39283	0.059786	5.40694	0.005835
3A3_Heavy	84	89	SSLTSE			5	623.288	FL_Alone	16.667	625.86	0.037621	2.19265	0.05375	5.40227	0.005983
3A3_Heavy	84	89	SSLTSE			5	623.288	FL_S2_Complex	0	623.667	0.038389	0	0	5.40725	0.00811
3A3_Heavy	84	89	SSLTSE			5	623.288	FL_S2_Complex	0.167	624.882	0.037213	1.21473	0.053466	5.40055	0.001121
3A3_Heavy	84	89	SSLTSE			5	623.288	FL_S2_Complex	1.667	625.08	0.024147	1.41292	0.045352	5.40156	0.005262
3A3_Heavy	84	89	SSLTSE			5	623.288	FL_S2_Complex	16.667	625.932	0.03419	2.2646	0.051407	5.40384	0.003095
3A3_Heavy	84	90	SSLTSED			6	738.315	FL_Alone	0	738.893	0.041281	0	0	5.44657	0.005348
3A3_Heavy	84	90	SSLTSED			6	738.315	FL_Alone	0.167	739.982	0.014339	1.08901	0.0437	5.44183	0.002216
3A3_Heavy	84	90	SSLTSED			6	738.315	FL_Alone	1.667	740.136	0.018687	1.24341	0.045314	5.44949	0.004337
3A3_Heavy	84	90	SSLTSED			6	738.315	FL_Alone	16.667	741.065	0.05762	2.17242	0.070881	5.44255	0.004128
3A3_Heavy	84	90	SSLTSED			6	738.315	FL_S2_Complex	0	738.893	0.041281	0	0	5.44657	0.005348
3A3_Heavy	84	90	SSLTSED			6	738.315	FL_S2_Complex	0.167	739.949	0.052436	1.05612	0.066736	5.44202	0.001751
3A3_Heavy	84	90	SSLTSED			6	738.315	FL_S2_Complex	1.667	740.115	0.027891	1.22199	0.04982	5.44462	0.006828
3A3_Heavy	84	90	SSLTSED			6	738.315	FL_S2_Complex	16.667	741.129	0.016054	2.23568	0.044293	5.44098	0.006972
3A3_Heavy	84	91	SSLTSEDT			7	839.363	FL_Alone	0	839.753	0.027965	0	0	5.49559	0.006058
3A3_Heavy	84	91	SSLTSEDT			7	839.363	FL_Alone	0.167	841.08	0.031832	1.32662	0.042371	5.49269	0.003221
3A3_Heavy	84	91	SSLTSEDT			7	839.363	FL_Alone	1.667	841.276	0.022692	1.5225	0.036013	5.49568	0.003807
3A3_Heavy	84	91	SSLTSEDT			7	839.363	FL_Alone	16.667	842.256	0.037499	2.50286	0.046779	5.4922	0.006565
3A3_Heavy	84	91	SSLTSEDT			7	839.363	FL_S2_Complex	0	839.753	0.027965	0	0	5.49559	0.006058
3A3_Heavy	84	91	SSLTSEDT			7	839.363	FL_S2_Complex	0.167	841.04	0.044998	1.28692	0.05298	5.49573	0.002245
3A3_Heavy	84	91	SSLTSEDT			7	839.363	FL_S2_Complex	1.667	841.266	0.024122	1.5125	0.036931	5.49861	0.004482
3A3_Heavy	84	91	SSLTSEDT			7	839.363	FL_S2_Complex	16.667	842.313	0.045578	2.55911	0.053473	5.49802	0.0036
3A3_Heavy	84	92	SSLTSEDTA			8	910.4	FL_Alone	0	910.799	0.019012	0	0	5.58952	0.005715
3A3_Heavy	84	92	SSLTSEDTA			8	910.4	FL_Alone	0.167	912.205	0.04503	1.40593	0.048879	5.58496	0.004197
3A3_Heavy	84	92	SSLTSEDTA			8	910.4	FL_Alone	1.667	912.393	0.037937	1.59466	0.042434	5.58797	0.002266
3A3_Heavy	84	92	SSLTSEDTA			8	910.4	FL_Alone	16.667	913.364	0.053742	2.56543	0.057006	5.58428	0.004277
3A3_Heavy	84	92	SSLTSEDTA			8	910.4	FL_S2_Complex	0	910.799	0.019012	0	0	5.58952	0.005715
3A3_Heavy	84	92	SSLTSEDTA			8	910.4	FL_S2_Complex	0.167	912.148	0.060394	1.34921	0.063316	5.58665	0.00303
3A3_Heavy	84	92	SSLTSEDTA			8	910.4	FL_S2_Complex	1.667	912.305	0.035421	1.50676	0.040201	5.58737	0.00549
3A3_Heavy	84	92	SSLTSEDTA			8	910.4	FL_S2_Complex	16.667	913.416	0.020158	2.61718	0.027709	5.58859	0.004206
3A3_Heavy	84	93	SSLTSEDTAV			9	1009.47	FL_Alone	0	1010.15	0.033046	0	0	6.18846	0.006681
3A3_Heavy	84	93	SSLTSEDTAV			9	1009.47	FL_Alone	0.167	1011.34	0.03262	1.18893	0.046434	6.1893	0.003471
3A3_Heavy	84	93	SSLTSEDTAV			9	1009.47	FL_Alone	1.667	1011.53	0.025479	1.37967	0.041728	6.1885	0.002661
3A3_Heavy	84	93	SSLTSEDTAV			9	1009.47	FL_Alone	16.667	1012.47	0.051815	2.31557	0.061456	6.18372	0.008011
3A3_Heavy	84	93	SSLTSEDTAV			9	1009.47	FL_S2_Complex	0	1010.15	0.033046	0	0	6.18846	0.006681
3A3_Heavy	84	93	SSLTSEDTAV			9	1009.47	FL_S2_Complex	0.167	1011.31	0.05791	1.16214	0.066675	6.1802	0.002938
3A3_Heavy	84	93	SSLTSEDTAV			9	1009.47	FL_S2_Complex	1.667	1011.51	0.023729	1.36184	0.040683	6.18196	0.004914
3A3_Heavy	84	93	SSLTSEDTAV			9	1009.47	FL_S2_Complex	16.667	1012.51	0.033812	2.35583	0.047279	6.1794	0.003443
3A3_Heavy	87	94	TSEDTAVY			7	885.384	FL_Alone	0	885.777	0.009612	0	0	6.18126	0.005775
3A3_Heavy	87	94	TSEDTAVY			7	885.384	FL_Alone	0.167	886.251	0.086314	0.473734	0.086848	6.18441	0.00459
3A3_Heavy	87	94	TSEDTAVY			7	885.384	FL_Alone	1.667	886.344	0.035641	0.567041	0.036914	6.18595	0.003578
3A3_Heavy	87	94	TSEDTAVY			7	885.384	FL_Alone	16.667	886.488	0.031479	0.710864	0.032914	6.18216	0.00783
3A3_Heavy	87	94	TSEDTAVY			7	885.384	FL_S2_Complex	0	885.777	0.009612	0	0	6.18126	0.005775
3A3_Heavy	87	94	TSEDTAVY			7	885.384	FL_S2_Complex	0.167	886.208	0.084584	0.43082	0.085128	6.17632	0.004581
3A3_Heavy	87	94	TSEDTAVY			7	885.384	FL_S2_Complex	1.667	886.242	0.083615	0.464548	0.084165	6.1807	0.005306
3A3_Heavy	87	94	TSEDTAVY			7	885.384	FL_S2_Complex	16.667	886.422	0.061262	0.644755	0.062011	6.18023	0.004647
3A3_Heavy	104	109	YYYFDY			5	933.366	FL_Alone	0	933.855	0.014506	0	0	8.39616	0.004037
3A3_Heavy	104	109	YYYFDY			5	933.366	FL_Alone	0.167	934.419	0.035751	0.563827	0.038582	8.40924	0.00446
3A3_Heavy	104	109	YYYFDY			5	933.366	FL_Alone	1.667	935.06	0.024795	1.20486	0.028727	8.40076	0.005247
3A3_Heavy	104	109	YYYFDY			5	933.366	FL_Alone	16.667	935.909	0.043148	2.05399	0.045521	8.39531	0.008735
3A3_Heavy	104	109	YYYFDY			5	933.366	FL_S2_Complex	0	933.855	0.014506	0	0	8.39616	0.004037
3A3_Heavy	104	109	YYYFDY			5	933.366	FL_S2_Complex	0.167	934.378	0.034005	0.523163	0.036969	8.40142	0.002192
3A3_Heavy	104	109	YYYFDY			5	933.366	FL_S2_Complex	1.667	934.896	0.010492	1.04115	0.017902	8.40875	0.008109
3A3_Heavy	104	109	YYYFDY			5	933.366	FL_S2_Complex	16.667	935.741	0.023982	1.88604	0.028028	8.4018	0.005413
3A3_Heavy	105	116	YYFDYWGQGTTL			11	1513.66	FL_Alone	0	1514.91	0.050342	0	0	8.78132	0.00898
3A3_Heavy	105	116	YYFDYWGQGTTL			11	1513.66	FL_Alone	0.167	1516.07	0.041661	1.1589	0.065345	8.79566	0.00964
3A3_Heavy	105	116	YYFDYWGQGTTL			11	1513.66	FL_Alone	1.667	1516.64	0.023279	1.73256	0.055464	8.78918	0.004418
3A3_Heavy	105	116	YYFDYWGQGTTL			11	1513.66	FL_Alone	16.667	1518.21	0.118051	3.29651	0.128337	8.78058	0.010087
3A3_Heavy	105	116	YYFDYWGQGTTL			11	1513.66	FL_S2_Complex	0	1514.91	0.050342	0	0	8.78132	0.00898
3A3_Heavy	105	116	YYFDYWGQGTTL			11	1513.66	FL_S2_Complex	0.167	1515.98	0.063672	1.07443	0.08117	8.78589	0.006786
3A3_Heavy	105	116	YYFDYWGQGTTL			11	1513.66	FL_S2_Complex	1.667	1516.52	0.022199	1.60914	0.055019	8.78706	0.008453
3A3_Heavy	105	116	YYFDYWGQGTTL			11	1513.66	FL_S2_Complex	16.667	1517.98	0.064638	3.06811	0.081929	8.7903	0.003208
3A3_Heavy	106	116	YFDYWGQGTTL			10	1350.6	FL_Alone	0	1351.41	0.005435	0	0	8.51912	0.010678
3A3_Heavy	106	116	YFDYWGQGTTL			10	1350.6	FL_Alone	0.167	1352.56	0.02936	1.14791	0.029859	8.5349	0.005061
3A3_Heavy	106	116	YFDYWGQGTTL			10	1350.6	FL_Alone	1.667	1352.97	0.033529	1.56187	0.033967	8.5304	0.002517
3A3_Heavy	106	116	YFDYWGQGTTL			10	1350.6	FL_Alone	16.667	1354.12	0.057894	2.70736	0.058149	8.52113	0.006043
3A3_Heavy	106	116	YFDYWGQGTTL			10	1350.6	FL_S2_Complex	0	1351.41	0.005435	0	0	8.51912	0.010678
3A3_Heavy	106	116	YFDYWGQGTTL			10	1350.6	FL_S2_Complex	0.167	1352.53	0.047289	1.12529	0.0476	8.52882	0.006733
3A3_Heavy	106	116	YFDYWGQGTTL			10	1350.6	FL_S2_Complex	1.667	1352.92	0.006577	1.50806	0.008532	8.53341	0.008095
3A3_Heavy	106	116	YFDYWGQGTTL			10	1350.6	FL_S2_Complex	16.667	1354	0.032156	2.58763	0.032612	8.53326	0.00461
3A3_Heavy	107	116	FDYWGQGTTL			9	1187.54	FL_Alone	0	1188.19	0.014257	0	0	8.2238	0.005034
3A3_Heavy	107	116	FDYWGQGTTL			9	1187.54	FL_Alone	0.167	1189.4	0.032763	1.21173	0.035731	8.23559	0.004686
3A3_Heavy	107	116	FDYWGQGTTL			9	1187.54	FL_Alone	1.667	1189.83	0.015895	1.63933	0.021352	8.22942	0.006854
3A3_Heavy	107	116	FDYWGQGTTL			9	1187.54	FL_Alone	16.667	1190.85	0.05254	2.65469	0.05444	8.22749	0.005924
3A3_Heavy	107	116	FDYWGQGTTL			9	1187.54	FL_S2_Complex	0	1188.19	0.014257	0	0	8.2238	0.005034
3A3_Heavy	107	116	FDYWGQGTTL			9	1187.54	FL_S2_Complex	0.167	1189.38	0.047134	1.18425	0.049243	8.23204	0.003313
3A3_Heavy	107	116	FDYWGQGTTL			9	1187.54	FL_S2_Complex	1.667	1189.79	0.013155	1.59462	0.019398	8.235	0.006196
3A3_Heavy	107	116	FDYWGQGTTL			9	1187.54	FL_S2_Complex	16.667	1190.79	0.013518	2.59445	0.019647	8.23185	0.008353
3A3_Heavy	109	116	YWGQGTTL			7	925.441	FL_Alone	0	925.956	0.010938	0	0	7.71738	0.002344
3A3_Heavy	109	116	YWGQGTTL			7	925.441	FL_Alone	0.167	927.189	0.02502	1.23231	0.027307	7.72716	0.00462
3A3_Heavy	109	116	YWGQGTTL			7	925.441	FL_Alone	1.667	927.398	0.028673	1.44134	0.030689	7.72581	0.003016
3A3_Heavy	109	116	YWGQGTTL			7	925.441	FL_Alone	16.667	927.677	0.020537	1.72042	0.023268	7.71952	0.003841
3A3_Heavy	109	116	YWGQGTTL			7	925.441	FL_S2_Complex	0	925.956	0.010938	0	0	7.71738	0.002344
3A3_Heavy	109	116	YWGQGTTL			7	925.441	FL_S2_Complex	0.167	927.14	0.053803	1.18375	0.054904	7.72146	0.00092
3A3_Heavy	109	116	YWGQGTTL			7	925.441	FL_S2_Complex	1.667	927.325	0.024985	1.36887	0.027274	7.72668	0.00738
3A3_Heavy	109	116	YWGQGTTL			7	925.441	FL_S2_Complex	16.667	927.592	0.050211	1.63585	0.051389	7.72358	0.006161
3A3_Heavy	117	129	TVSSASTKGPSVF			11	1267.65	FL_Alone	0	1268.23	0.016846	0	0	6.45466	0.006379
3A3_Heavy	117	129	TVSSASTKGPSVF			11	1267.65	FL_Alone	0.167	1268.9	0.040216	0.665452	0.043602	6.46212	0.005291
3A3_Heavy	117	129	TVSSASTKGPSVF			11	1267.65	FL_Alone	1.667	1269.54	0.088094	1.30614	0.08969	6.4583	0.002358
3A3_Heavy	117	129	TVSSASTKGPSVF			11	1267.65	FL_Alone	16.667	1269.51	0.118264	1.27484	0.119457	6.45495	0.004897
3A3_Heavy	117	129	TVSSASTKGPSVF			11	1267.65	FL_S2_Complex	0	1268.23	0.016846	0	0	6.45466	0.006379
3A3_Heavy	117	129	TVSSASTKGPSVF			11	1267.65	FL_S2_Complex	0.167	1268.86	0.097571	0.628075	0.099014	6.45224	0.003386
3A3_Heavy	117	129	TVSSASTKGPSVF			11	1267.65	FL_S2_Complex	1.667	1269.46	0.054778	1.22268	0.05731	6.45413	0.010921
3A3_Heavy	117	129	TVSSASTKGPSVF			11	1267.65	FL_S2_Complex	16.667	1269.45	0.167978	1.21225	0.168821	6.45671	0.006958
3A3_Heavy	149	158	VKDYFPEPVT			7	1194.6	FL_Alone	0	1195.28	0.064334	0	0	6.81172	0.004551
3A3_Heavy	149	158	VKDYFPEPVT			7	1194.6	FL_Alone	0.167	1195.4	0.04583	0.117557	0.078989	6.82026	0.00643
3A3_Heavy	149	158	VKDYFPEPVT			7	1194.6	FL_Alone	1.667	1195.74	0.055883	0.461905	0.085216	6.82501	0.003223
3A3_Heavy	149	158	VKDYFPEPVT			7	1194.6	FL_Alone	16.667	1196.26	0.129435	0.977102	0.144541	6.81473	0.003207
3A3_Heavy	149	158	VKDYFPEPVT			7	1194.6	FL_S2_Complex	0	1195.28	0.064334	0	0	6.81172	0.004551
3A3_Heavy	149	158	VKDYFPEPVT			7	1194.6	FL_S2_Complex	0.167	1195.38	0.019763	0.096461	0.067301	6.8132	0.003611
3A3_Heavy	149	158	VKDYFPEPVT			7	1194.6	FL_S2_Complex	1.667	1195.75	0.066418	0.471229	0.092468	6.81432	0.008639
3A3_Heavy	149	158	VKDYFPEPVT			7	1194.6	FL_S2_Complex	16.667	1196.29	0.071834	1.00964	0.096431	6.81304	0.003808
3A3_Heavy	166	177	LTSGVHTFPAVL			10	1241.69	FL_Alone	0	1242.49	0.029242	0	0	7.30464	0.004485
3A3_Heavy	166	177	LTSGVHTFPAVL			10	1241.69	FL_Alone	0.167	1244.06	0.021841	1.56485	0.036499	7.31043	0.004699
3A3_Heavy	166	177	LTSGVHTFPAVL			10	1241.69	FL_Alone	1.667	1244.7	0.123411	2.20313	0.126828	7.30862	0.00585
3A3_Heavy	166	177	LTSGVHTFPAVL			10	1241.69	FL_Alone	16.667	1244.84	0.079785	2.35056	0.084975	7.30574	0.008402
3A3_Heavy	166	177	LTSGVHTFPAVL			10	1241.69	FL_S2_Complex	0	1242.49	0.029242	0	0	7.30464	0.004485
3A3_Heavy	166	177	LTSGVHTFPAVL			10	1241.69	FL_S2_Complex	0.167	1244.03	0.079118	1.53723	0.084349	7.31118	0.002232
3A3_Heavy	166	177	LTSGVHTFPAVL			10	1241.69	FL_S2_Complex	1.667	1244.63	0.057074	2.14103	0.064129	7.31236	0.006032
3A3_Heavy	166	177	LTSGVHTFPAVL			10	1241.69	FL_S2_Complex	16.667	1244.82	0.12896	2.33089	0.132234	7.31391	0.003266
3A3_Heavy	183	188	YSLSSV			5	655.33	FL_Alone	0	655.878	0.020771	0	0	6.91546	0.004288
3A3_Heavy	183	188	YSLSSV			5	655.33	FL_Alone	0.167	655.971	0.011258	0.092497	0.023626	6.92125	0.004354
3A3_Heavy	183	188	YSLSSV			5	655.33	FL_Alone	1.667	655.951	0.01094	0.072701	0.023476	6.92378	0.003614
3A3_Heavy	183	188	YSLSSV			5	655.33	FL_Alone	16.667	656.001	0.015342	0.122877	0.025823	6.91692	0.005707
3A3_Heavy	183	188	YSLSSV			5	655.33	FL_S2_Complex	0	655.878	0.020771	0	0	6.91546	0.004288
3A3_Heavy	183	188	YSLSSV			5	655.33	FL_S2_Complex	0.167	655.896	0.022882	0.017799	0.030903	6.91442	0.00298
3A3_Heavy	183	188	YSLSSV			5	655.33	FL_S2_Complex	1.667	655.891	0.048302	0.012368	0.052579	6.92164	0.006149
3A3_Heavy	183	188	YSLSSV			5	655.33	FL_S2_Complex	16.667	655.931	0.021339	0.052689	0.029779	6.9152	0.004905
3A3_Heavy	183	196	YSLSSVVTVPSSSL			12	1425.75	FL_Alone	0	1426.51	0.021883	0	0	7.59566	0.003945
3A3_Heavy	183	196	YSLSSVVTVPSSSL			12	1425.75	FL_Alone	0.167	1428.82	0.066665	2.30458	0.070164	7.60402	0.00481
3A3_Heavy	183	196	YSLSSVVTVPSSSL			12	1425.75	FL_Alone	1.667	1428.96	0.081817	2.44148	0.084693	7.59242	0.00301
3A3_Heavy	183	196	YSLSSVVTVPSSSL			12	1425.75	FL_Alone	16.667	1429.1	0.062266	2.58486	0.065999	7.59203	0.011099
3A3_Heavy	183	196	YSLSSVVTVPSSSL			12	1425.75	FL_S2_Complex	0	1426.51	0.021883	0	0	7.59566	0.003945
3A3_Heavy	183	196	YSLSSVVTVPSSSL			12	1425.75	FL_S2_Complex	0.167	1428.8	0.141473	2.28444	0.143155	7.60186	0.000812
3A3_Heavy	183	196	YSLSSVVTVPSSSL			12	1425.75	FL_S2_Complex	1.667	1428.91	0.115632	2.4005	0.117684	7.61187	0.00648
3A3_Heavy	183	196	YSLSSVVTVPSSSL			12	1425.75	FL_S2_Complex	16.667	1429.06	0.041594	2.54396	0.046999	7.60459	0.0018
3A3_Heavy	188	200	VVTVPSSSLGTQT			11	1275.68	FL_Alone	0	1276.39	0.015829	0	0	6.20393	0.004749
3A3_Heavy	188	200	VVTVPSSSLGTQT			11	1275.68	FL_Alone	0.167	1280.75	0.06214	4.36381	0.064125	6.20766	0.003237
3A3_Heavy	188	200	VVTVPSSSLGTQT			11	1275.68	FL_Alone	1.667	1280.81	0.17005	4.42428	0.170786	6.20881	0.001484
3A3_Heavy	188	200	VVTVPSSSLGTQT			11	1275.68	FL_Alone	16.667	1280.94	0.157077	4.54704	0.157872	6.20601	0.007507
3A3_Heavy	188	200	VVTVPSSSLGTQT			11	1275.68	FL_S2_Complex	0	1276.39	0.015829	0	0	6.20393	0.004749
3A3_Heavy	188	200	VVTVPSSSLGTQT			11	1275.68	FL_S2_Complex	0.167	1280.56	0.215164	4.17525	0.215746	6.20326	0.004545
3A3_Heavy	188	200	VVTVPSSSLGTQT			11	1275.68	FL_S2_Complex	1.667	1280.72	0.128483	4.32769	0.129454	6.2013	0.003287
3A3_Heavy	188	200	VVTVPSSSLGTQT			11	1275.68	FL_S2_Complex	16.667	1280.88	0.082427	4.49084	0.083933	6.20192	0.002244
3A3_Heavy	189	196	VTVPSSSL			6	789.435	FL_Alone	0	789.903	0.031588	0	0	6.44919	0.002961
3A3_Heavy	189	196	VTVPSSSL			6	789.435	FL_Alone	0.167	791.912	0.023467	2.00907	0.039351	6.45057	0.002395
3A3_Heavy	189	196	VTVPSSSL			6	789.435	FL_Alone	1.667	791.944	0.067704	2.0407	0.07471	6.45215	0.002302
3A3_Heavy	189	196	VTVPSSSL			6	789.435	FL_Alone	16.667	791.998	0.088205	2.09503	0.09369	6.44679	0.005743
3A3_Heavy	189	196	VTVPSSSL			6	789.435	FL_S2_Complex	0	789.903	0.031588	0	0	6.44919	0.002961
3A3_Heavy	189	196	VTVPSSSL			6	789.435	FL_S2_Complex	0.167	791.822	0.065766	1.91845	0.072959	6.4426	0.003319
3A3_Heavy	189	196	VTVPSSSL			6	789.435	FL_S2_Complex	1.667	791.915	0.065518	2.01176	0.072735	6.44705	0.005957
3A3_Heavy	189	196	VTVPSSSL			6	789.435	FL_S2_Complex	16.667	791.972	0.052333	2.06886	0.061127	6.44667	0.00434
3A3_Heavy	189	200	VTVPSSSLGTQT			10	1176.61	FL_Alone	0	1177.32	0.013951	0	0	6.06603	0.002829
3A3_Heavy	189	200	VTVPSSSLGTQT			10	1176.61	FL_Alone	0.167	1181.68	0.065399	4.35887	0.06687	6.06402	0.004372
3A3_Heavy	189	200	VTVPSSSLGTQT			10	1176.61	FL_Alone	1.667	1181.74	0.1377	4.42026	0.138405	6.06448	0.003614
3A3_Heavy	189	200	VTVPSSSLGTQT			10	1176.61	FL_Alone	16.667	1181.76	0.142486	4.43601	0.143167	6.06313	0.005382
3A3_Heavy	189	200	VTVPSSSLGTQT			10	1176.61	FL_S2_Complex	0	1177.32	0.013951	0	0	6.06603	0.002829
3A3_Heavy	189	200	VTVPSSSLGTQT			10	1176.61	FL_S2_Complex	0.167	1181.5	0.187511	4.17729	0.18803	6.06328	0.003166
3A3_Heavy	189	200	VTVPSSSLGTQT			10	1176.61	FL_S2_Complex	1.667	1181.61	0.098183	4.2886	0.099169	6.06859	0.005274
3A3_Heavy	189	200	VTVPSSSLGTQT			10	1176.61	FL_S2_Complex	16.667	1181.71	0.073706	4.38357	0.075015	6.06541	0.005526
3A3_Heavy	192	200	PSSSLGTQT			7	877.426	FL_Alone	0	877.784	0.052709	0	0	6.06309	0.002646
3A3_Heavy	192	200	PSSSLGTQT			7	877.426	FL_Alone	0.167	881.326	0.030772	3.54202	0.061034	6.05673	0.005162
3A3_Heavy	192	200	PSSSLGTQT			7	877.426	FL_Alone	1.667	881.435	0.150981	3.65146	0.159917	6.06118	0.005531
3A3_Heavy	192	200	PSSSLGTQT			7	877.426	FL_Alone	16.667	881.302	0.092696	3.51842	0.106634	6.0616	0.002958
3A3_Heavy	192	200	PSSSLGTQT			7	877.426	FL_S2_Complex	0	877.784	0.052709	0	0	6.06309	0.002646
3A3_Heavy	192	200	PSSSLGTQT			7	877.426	FL_S2_Complex	0.167	881.248	0.056403	3.46373	0.077198	6.06409	0.005708
3A3_Heavy	192	200	PSSSLGTQT			7	877.426	FL_S2_Complex	1.667	881.368	0.089689	3.58428	0.104031	6.06623	0.001235
3A3_Heavy	192	200	PSSSLGTQT			7	877.426	FL_S2_Complex	16.667	881.303	0.061917	3.51889	0.081314	6.06377	0.005043
3A3_Heavy	195	205	SLGTQTYICNV			10	1198.58	FL_Alone	0	1199.14	0.017979	0	0	6.06249	0.002859
3A3_Heavy	195	205	SLGTQTYICNV			10	1198.58	FL_Alone	0.167	1203.65	0.109676	4.50983	0.11114	6.06173	0.003716
3A3_Heavy	195	205	SLGTQTYICNV			10	1198.58	FL_Alone	1.667	1203.76	0.114275	4.62649	0.115681	6.06379	0.003629
3A3_Heavy	195	205	SLGTQTYICNV			10	1198.58	FL_Alone	16.667	1203.74	0.101416	4.59966	0.102998	6.06451	0.005425
3A3_Heavy	195	205	SLGTQTYICNV			10	1198.58	FL_S2_Complex	0	1199.14	0.017979	0	0	6.06249	0.002859
3A3_Heavy	195	205	SLGTQTYICNV			10	1198.58	FL_S2_Complex	0.167	1203.64	0.167744	4.50178	0.168704	6.06814	0.005011
3A3_Heavy	195	205	SLGTQTYICNV			10	1198.58	FL_S2_Complex	1.667	1203.71	0.103473	4.57562	0.105024	6.07114	0.00608
3A3_Heavy	195	205	SLGTQTYICNV			10	1198.58	FL_S2_Complex	16.667	1203.8	0.132041	4.6639	0.13326	6.06741	0.005415
3A3_Heavy	238	243	LGGPSV			4	529.298	FL_Alone	0	529.736	0.031201	0	0	5.96539	0.004236
3A3_Heavy	238	243	LGGPSV			4	529.298	FL_Alone	0.167	530.189	0.036023	0.453002	0.047657	5.96369	0.00558
3A3_Heavy	238	243	LGGPSV			4	529.298	FL_Alone	1.667	530.515	0.0207	0.778904	0.037443	5.96608	0.005271
3A3_Heavy	238	243	LGGPSV			4	529.298	FL_Alone	16.667	531.023	0.040259	1.2867	0.050934	5.96125	0.003669
3A3_Heavy	238	243	LGGPSV			4	529.298	FL_S2_Complex	0	529.736	0.031201	0	0	5.96539	0.004236
3A3_Heavy	238	243	LGGPSV			4	529.298	FL_S2_Complex	0.167	530.149	0.047491	0.41282	0.056823	5.95945	0.00271
3A3_Heavy	238	243	LGGPSV			4	529.298	FL_S2_Complex	1.667	530.541	0.014405	0.80527	0.034366	5.96761	0.0069
3A3_Heavy	238	243	LGGPSV			4	529.298	FL_S2_Complex	16.667	531.049	0.04273	1.31232	0.052909	5.9635	0.009023
3A3_Heavy	238	255	LGGPSVFLFPPKPKDTLM			13	1944.07	FL_Alone	0	1945.4	0.072542	0	0	7.6852	0.016915
3A3_Heavy	238	255	LGGPSVFLFPPKPKDTLM			13	1944.07	FL_Alone	0.167	1945.45	0.090831	0.048167	0.116244	7.6963	0.001576
3A3_Heavy	238	255	LGGPSVFLFPPKPKDTLM			13	1944.07	FL_Alone	1.667	1945.38	0.020382	-0.015611	0.075351	7.68846	0.008393
3A3_Heavy	238	255	LGGPSVFLFPPKPKDTLM			13	1944.07	FL_Alone	16.667	1945.49	0.074445	0.095264	0.103945	7.69453	0.010689
3A3_Heavy	238	255	LGGPSVFLFPPKPKDTLM			13	1944.07	FL_S2_Complex	0	1945.4	0.072542	0	0	7.6852	0.016915
3A3_Heavy	238	255	LGGPSVFLFPPKPKDTLM			13	1944.07	FL_S2_Complex	0.167	1945.49	0.148343	0.0886	0.16513	7.69208	0.006229
3A3_Heavy	238	255	LGGPSVFLFPPKPKDTLM			13	1944.07	FL_S2_Complex	1.667	1945.47	0.166094	0.073956	0.181245	7.69492	0.010895
3A3_Heavy	238	255	LGGPSVFLFPPKPKDTLM			13	1944.07	FL_S2_Complex	16.667	1945.67	0.086871	0.269013	0.113177	7.69603	0.001974
3A3_Heavy	244	254	FLFPPKPKDTL			7	1302.75	FL_Alone	0	1303.52	0.016217	0	0	6.73777	0.007248
3A3_Heavy	244	254	FLFPPKPKDTL			7	1302.75	FL_Alone	0.167	1304.46	0.068354	0.939241	0.070251	6.74333	0.00364
3A3_Heavy	244	254	FLFPPKPKDTL			7	1302.75	FL_Alone	1.667	1305.2	0.054132	1.68636	0.056509	6.73975	0.003016
3A3_Heavy	244	254	FLFPPKPKDTL			7	1302.75	FL_Alone	16.667	1305.99	0.116314	2.4746	0.117439	6.73253	0.005364
3A3_Heavy	244	254	FLFPPKPKDTL			7	1302.75	FL_S2_Complex	0	1303.52	0.016217	0	0	6.73777	0.007248
3A3_Heavy	244	254	FLFPPKPKDTL			7	1302.75	FL_S2_Complex	0.167	1304.43	0.07224	0.908302	0.074038	6.72975	0.007502
3A3_Heavy	244	254	FLFPPKPKDTL			7	1302.75	FL_S2_Complex	1.667	1305.19	0.055105	1.67167	0.057441	6.73926	0.010509
3A3_Heavy	244	254	FLFPPKPKDTL			7	1302.75	FL_S2_Complex	16.667	1305.93	0.088979	2.41033	0.090445	6.72983	0.011199
3A3_Heavy	244	255	FLFPPKPKDTLM			8	1433.79	FL_Alone	0	1434.82	0.022867	0	0	6.97828	0.003525
3A3_Heavy	244	255	FLFPPKPKDTLM			8	1433.79	FL_Alone	0.167	1435.68	0.034834	0.857658	0.041669	6.98226	0.002286
3A3_Heavy	244	255	FLFPPKPKDTLM			8	1433.79	FL_Alone	1.667	1436.54	0.068581	1.72326	0.072293	6.97556	0.003282
3A3_Heavy	244	255	FLFPPKPKDTLM			8	1433.79	FL_Alone	16.667	1437.51	0.084565	2.68892	0.087602	6.97364	0.00658
3A3_Heavy	244	255	FLFPPKPKDTLM			8	1433.79	FL_S2_Complex	0	1434.82	0.022867	0	0	6.97828	0.003525
3A3_Heavy	244	255	FLFPPKPKDTLM			8	1433.79	FL_S2_Complex	0.167	1435.64	0.073027	0.818442	0.076523	6.97686	0.003331
3A3_Heavy	244	255	FLFPPKPKDTLM			8	1433.79	FL_S2_Complex	1.667	1436.46	0.080514	1.63902	0.083698	6.98251	0.01069
3A3_Heavy	244	255	FLFPPKPKDTLM			8	1433.79	FL_S2_Complex	16.667	1437.51	0.069789	2.69364	0.07344	6.97595	0.003952
3A3_Heavy	245	255	LFPPKPKDTLM			7	1286.72	FL_Alone	0	1287.47	0.010152	0	0	6.3059	0.005485
3A3_Heavy	245	255	LFPPKPKDTLM			7	1286.72	FL_Alone	0.167	1288.53	0.014237	1.05533	0.017486	6.31158	0.005134
3A3_Heavy	245	255	LFPPKPKDTLM			7	1286.72	FL_Alone	1.667	1289.51	0.052023	2.03206	0.053004	6.31274	0.00564
3A3_Heavy	245	255	LFPPKPKDTLM			7	1286.72	FL_Alone	16.667	1290.69	0.06731	3.21233	0.068071	6.30994	0.008354
3A3_Heavy	245	255	LFPPKPKDTLM			7	1286.72	FL_S2_Complex	0	1287.47	0.010152	0	0	6.3059	0.005485
3A3_Heavy	245	255	LFPPKPKDTLM			7	1286.72	FL_S2_Complex	0.167	1288.48	0.04245	1.01044	0.043647	6.3104	0.003294
3A3_Heavy	245	255	LFPPKPKDTLM			7	1286.72	FL_S2_Complex	1.667	1289.46	0.090583	1.98883	0.091151	6.31436	0.006458
3A3_Heavy	245	255	LFPPKPKDTLM			7	1286.72	FL_S2_Complex	16.667	1290.67	0.042213	3.193	0.043416	6.30884	0.002904
3A3_Heavy	247	255	PPKPKDTLM			5	1026.57	FL_Alone	0	1027.77	0.056664	0	0	6.31339	0.006214
3A3_Heavy	247	255	PPKPKDTLM			5	1026.57	FL_Alone	0.167	1028.38	0.038471	0.605764	0.06849	6.32142	0.004738
3A3_Heavy	247	255	PPKPKDTLM			5	1026.57	FL_Alone	1.667	1029.09	0.049844	1.31692	0.075467	6.32175	0.006286
3A3_Heavy	247	255	PPKPKDTLM			5	1026.57	FL_Alone	16.667	1030.02	0.060588	2.25073	0.082956	6.3163	0.009142
3A3_Heavy	247	255	PPKPKDTLM			5	1026.57	FL_S2_Complex	0	1027.73	0.057975	0	0	6.31295	0.005831
3A3_Heavy	247	255	PPKPKDTLM			5	1026.57	FL_S2_Complex	0.167	1028.35	0.024425	0.617828	0.06291	6.323	0.007744
3A3_Heavy	247	255	PPKPKDTLM			5	1026.57	FL_S2_Complex	1.667	1029	0.013291	1.26493	0.059479	6.32084	0.003345
3A3_Heavy	247	255	PPKPKDTLM			5	1026.57	FL_S2_Complex	16.667	1029.93	0.024481	2.19461	0.062932	6.31907	0.002435
3A3_Heavy	256	265	ISRTPEVTCV			8	1104.57	FL_Alone	0	1105.17	0.029647	0	0	6.20132	0.005213
3A3_Heavy	256	265	ISRTPEVTCV			8	1104.57	FL_Alone	0.167	1106.27	0.058748	1.10685	0.065805	6.20955	0.004171
3A3_Heavy	256	265	ISRTPEVTCV			8	1104.57	FL_Alone	1.667	1106.48	0.025238	1.30987	0.038935	6.21075	0.001867
3A3_Heavy	256	265	ISRTPEVTCV			8	1104.57	FL_Alone	16.667	1106.61	0.05108	1.449	0.05906	6.20534	0.00732
3A3_Heavy	256	265	ISRTPEVTCV			8	1104.57	FL_S2_Complex	0	1105.17	0.029647	0	0	6.20132	0.005213
3A3_Heavy	256	265	ISRTPEVTCV			8	1104.57	FL_S2_Complex	0.167	1106.15	0.091144	0.981226	0.095845	6.1921	0.004148
3A3_Heavy	256	265	ISRTPEVTCV			8	1104.57	FL_S2_Complex	1.667	1106.35	0.102509	1.18238	0.10671	6.19779	0.004994
3A3_Heavy	256	265	ISRTPEVTCV			8	1104.57	FL_S2_Complex	16.667	1106.57	0.04167	1.40852	0.051141	6.1963	0.00423
3A3_Heavy	265	280	VVVDVSHEDPEVKFNW			14	1898.93	FL_Alone	0	1900.07	0.033868	0	0	7.37929	0.006901
3A3_Heavy	265	280	VVVDVSHEDPEVKFNW			14	1898.93	FL_Alone	0.167	1902.18	0.047424	2.11312	0.058275	7.38995	0.005984
3A3_Heavy	265	280	VVVDVSHEDPEVKFNW			14	1898.93	FL_Alone	1.667	1903.18	0.098323	3.11462	0.103993	7.38464	0.004065
3A3_Heavy	265	280	VVVDVSHEDPEVKFNW			14	1898.93	FL_Alone	16.667	1903.9	0.155132	3.83413	0.158786	7.37826	0.010251
3A3_Heavy	265	280	VVVDVSHEDPEVKFNW			14	1898.93	FL_S2_Complex	0	1900.07	0.033868	0	0	7.37929	0.006901
3A3_Heavy	265	280	VVVDVSHEDPEVKFNW			14	1898.93	FL_S2_Complex	0.167	1902.14	0.063478	2.07066	0.071948	7.3846	0.005227
3A3_Heavy	265	280	VVVDVSHEDPEVKFNW			14	1898.93	FL_S2_Complex	1.667	1903.16	0.032582	3.09652	0.046996	7.38736	0.006086
3A3_Heavy	265	280	VVVDVSHEDPEVKFNW			14	1898.93	FL_S2_Complex	16.667	1903.91	0.11567	3.83819	0.120527	7.38642	0.003303
3A3_Heavy	266	280	VVDVSHEDPEVKFNW			13	1799.86	FL_Alone	0	1800.91	0.01395	0	0	7.32694	0.004918
3A3_Heavy	266	280	VVDVSHEDPEVKFNW			13	1799.86	FL_Alone	0.167	1802.87	0.051413	1.96466	0.053272	7.34233	0.011937
3A3_Heavy	266	280	VVDVSHEDPEVKFNW			13	1799.86	FL_Alone	1.667	1803.84	0.084246	2.93389	0.085393	7.32847	0.008598
3A3_Heavy	266	280	VVDVSHEDPEVKFNW			13	1799.86	FL_Alone	16.667	1804.48	0.099121	3.57035	0.100098	7.32873	0.005725
3A3_Heavy	266	280	VVDVSHEDPEVKFNW			13	1799.86	FL_S2_Complex	0	1800.91	0.01395	0	0	7.32694	0.004918
3A3_Heavy	266	280	VVDVSHEDPEVKFNW			13	1799.86	FL_S2_Complex	0.167	1802.95	0.079691	2.04686	0.080903	7.32519	0.006208
3A3_Heavy	266	280	VVDVSHEDPEVKFNW			13	1799.86	FL_S2_Complex	1.667	1803.83	0.072337	2.92412	0.07367	7.33264	0.007287
3A3_Heavy	266	280	VVDVSHEDPEVKFNW			13	1799.86	FL_S2_Complex	16.667	1804.54	0.069699	3.63611	0.071082	7.32809	0.005147
3A3_Heavy	269	280	VSHEDPEVKFNW			10	1486.7	FL_Alone	0	1487.59	0.029302	0	0	7.14687	0.00212
3A3_Heavy	269	280	VSHEDPEVKFNW			10	1486.7	FL_Alone	0.167	1489.21	0.049869	1.61322	0.057841	7.15739	0.007806
3A3_Heavy	269	280	VSHEDPEVKFNW			10	1486.7	FL_Alone	1.667	1489.74	0.046857	2.15048	0.055265	7.15167	0.006816
3A3_Heavy	269	280	VSHEDPEVKFNW			10	1486.7	FL_Alone	16.667	1490.11	0.062599	2.51759	0.069118	7.14664	0.005922
3A3_Heavy	269	280	VSHEDPEVKFNW			10	1486.7	FL_S2_Complex	0	1487.59	0.029302	0	0	7.14687	0.00212
3A3_Heavy	269	280	VSHEDPEVKFNW			10	1486.7	FL_S2_Complex	0.167	1489.14	0.058082	1.5426	0.065055	7.15436	0.005027
3A3_Heavy	269	280	VSHEDPEVKFNW			10	1486.7	FL_S2_Complex	1.667	1489.71	0.064766	2.11217	0.071087	7.15677	0.007705
3A3_Heavy	269	280	VSHEDPEVKFNW			10	1486.7	FL_S2_Complex	16.667	1490.1	0.034057	2.50181	0.044928	7.15516	0.005862
3A3_Heavy	281	296	YVDGVEVHNAKTKPRE			14	1841.95	FL_Alone	0	1842.91	0.043678	0	0	4.79099	0.007154
3A3_Heavy	281	296	YVDGVEVHNAKTKPRE			14	1841.95	FL_Alone	0.167	1845.12	0.128786	2.21409	0.135991	4.7904	0.002615
3A3_Heavy	281	296	YVDGVEVHNAKTKPRE			14	1841.95	FL_Alone	1.667	1846.19	0.097156	3.27513	0.106523	4.79257	0.005874
3A3_Heavy	281	296	YVDGVEVHNAKTKPRE			14	1841.95	FL_Alone	16.667	1846.45	0.195718	3.53466	0.200532	4.78611	0.007878
3A3_Heavy	281	296	YVDGVEVHNAKTKPRE			14	1841.95	FL_S2_Complex	0	1842.91	0.043678	0	0	4.79099	0.007154
3A3_Heavy	281	296	YVDGVEVHNAKTKPRE			14	1841.95	FL_S2_Complex	0.167	1844.95	0.1329	2.0403	0.139893	4.79205	0.00916
3A3_Heavy	281	296	YVDGVEVHNAKTKPRE			14	1841.95	FL_S2_Complex	1.667	1845.93	0.110067	3.02331	0.118416	4.79785	0.007535
3A3_Heavy	281	296	YVDGVEVHNAKTKPRE			14	1841.95	FL_S2_Complex	16.667	1846.3	0.170409	3.38543	0.175917	4.79746	0.007918
3A3_Heavy	281	302	YVDGVEVHNAKTKPREEQYNST			20	2564.24	FL_Alone	0	2565.67	0.023271	0	0	5.08896	0.008355
3A3_Heavy	281	302	YVDGVEVHNAKTKPREEQYNST			20	2564.24	FL_Alone	0.167	2573.09	0.038813	7.4135	0.045254	5.08639	0.002646
3A3_Heavy	281	302	YVDGVEVHNAKTKPREEQYNST			20	2564.24	FL_Alone	1.667	2573.88	0.171673	8.21098	0.173243	5.08713	0.003175
3A3_Heavy	281	302	YVDGVEVHNAKTKPREEQYNST			20	2564.24	FL_Alone	16.667	2573.89	0.170509	8.21288	0.17209	5.08352	0.004747
3A3_Heavy	281	302	YVDGVEVHNAKTKPREEQYNST			20	2564.24	FL_S2_Complex	0	2565.67	0.023271	0	0	5.08896	0.008355
3A3_Heavy	281	302	YVDGVEVHNAKTKPREEQYNST			20	2564.24	FL_S2_Complex	0.167	2572.98	0.124054	7.30956	0.126218	5.08171	0.003849
3A3_Heavy	281	302	YVDGVEVHNAKTKPREEQYNST			20	2564.24	FL_S2_Complex	1.667	2573.53	0.144723	7.86043	0.146582	5.0909	0.00616
3A3_Heavy	281	302	YVDGVEVHNAKTKPREEQYNST			20	2564.24	FL_S2_Complex	16.667	2573.61	0.122232	7.93934	0.124428	5.09004	0.002297
3A3_Heavy	309	321	LTVLHQDWLNGKE			12	1552.81	FL_Alone	0	1553.67	0.010764	0	0	6.86451	0.007436
3A3_Heavy	309	321	LTVLHQDWLNGKE			12	1552.81	FL_Alone	0.167	1554.34	0.049041	0.676034	0.050209	6.87035	0.004599
3A3_Heavy	309	321	LTVLHQDWLNGKE			12	1552.81	FL_Alone	1.667	1554.74	0.065022	1.07607	0.065907	6.86929	0.004985
3A3_Heavy	309	321	LTVLHQDWLNGKE			12	1552.81	FL_Alone	16.667	1556.01	0.060155	2.34209	0.06111	6.86633	0.008104
3A3_Heavy	309	321	LTVLHQDWLNGKE			12	1552.81	FL_S2_Complex	0	1553.67	0.010764	0	0	6.86451	0.007436
3A3_Heavy	309	321	LTVLHQDWLNGKE			12	1552.81	FL_S2_Complex	0.167	1554.36	0.117953	0.691364	0.118443	6.86041	0.002825
3A3_Heavy	309	321	LTVLHQDWLNGKE			12	1552.81	FL_S2_Complex	1.667	1554.61	0.052101	0.948921	0.053201	6.86312	0.007034
3A3_Heavy	309	321	LTVLHQDWLNGKE			12	1552.81	FL_S2_Complex	16.667	1555.95	0.119126	2.27962	0.119611	6.86878	0.002483
3A3_Heavy	310	321	TVLHQDWLNGKE			11	1439.73	FL_Alone	0	1440.6	0.029369	0	0	6.53386	0.005253
3A3_Heavy	310	321	TVLHQDWLNGKE			11	1439.73	FL_Alone	0.167	1441.09	0.011428	0.491737	0.031514	6.53773	0.004836
3A3_Heavy	310	321	TVLHQDWLNGKE			11	1439.73	FL_Alone	1.667	1441.39	0.036474	0.787724	0.046829	6.53859	0.00681
3A3_Heavy	310	321	TVLHQDWLNGKE			11	1439.73	FL_Alone	16.667	1442.68	0.029707	2.07791	0.041774	6.53102	0.004241
3A3_Heavy	310	321	TVLHQDWLNGKE			11	1439.73	FL_S2_Complex	0	1440.6	0.029369	0	0	6.53386	0.005253
3A3_Heavy	310	321	TVLHQDWLNGKE			11	1439.73	FL_S2_Complex	0.167	1441.03	0.079889	0.42998	0.085116	6.52889	0.00544
3A3_Heavy	310	321	TVLHQDWLNGKE			11	1439.73	FL_S2_Complex	1.667	1441.31	0.045556	0.715329	0.054203	6.53766	0.009474
3A3_Heavy	310	321	TVLHQDWLNGKE			11	1439.73	FL_S2_Complex	16.667	1442.63	0.024592	2.03036	0.038306	6.5343	0.006832
3A3_Heavy	310	351	TVLHQDWLNGKEYKCKVSNKALPAPIEKTISKAKGQPREPQV			37	4729.56	FL_Alone	0	4732.46	0.064157	0	0	6.22739	0.006234
3A3_Heavy	310	351	TVLHQDWLNGKEYKCKVSNKALPAPIEKTISKAKGQPREPQV			37	4729.56	FL_Alone	0.167	4737.37	0.144099	4.91629	0.157736	6.23011	0.009095
3A3_Heavy	310	351	TVLHQDWLNGKEYKCKVSNKALPAPIEKTISKAKGQPREPQV			37	4729.56	FL_Alone	1.667	4739.43	0.25422	6.97002	0.262191	6.22747	0.011056
3A3_Heavy	310	351	TVLHQDWLNGKEYKCKVSNKALPAPIEKTISKAKGQPREPQV			37	4729.56	FL_Alone	16.667	4742.09	0.195346	9.63087	0.205612	6.22804	0.004147
3A3_Heavy	310	351	TVLHQDWLNGKEYKCKVSNKALPAPIEKTISKAKGQPREPQV			37	4729.56	FL_S2_Complex	0	4732.46	0.064157	0	0	6.22739	0.006234
3A3_Heavy	310	351	TVLHQDWLNGKEYKCKVSNKALPAPIEKTISKAKGQPREPQV			37	4729.56	FL_S2_Complex	0.167	4737.09	0.274659	4.63918	0.282053	6.21299	0.012721
3A3_Heavy	310	351	TVLHQDWLNGKEYKCKVSNKALPAPIEKTISKAKGQPREPQV			37	4729.56	FL_S2_Complex	1.667	4739.61	0.450923	7.15001	0.455464	6.21054	0.003499
3A3_Heavy	310	351	TVLHQDWLNGKEYKCKVSNKALPAPIEKTISKAKGQPREPQV			37	4729.56	FL_S2_Complex	16.667	4742.6	0.332964	10.1404	0.339089	6.20467	0.003969
3A3_Heavy	312	321	LHQDWLNGKE			9	1239.61	FL_Alone	0	1240.31	0.047018	0	0	6.533	0.00558
3A3_Heavy	312	321	LHQDWLNGKE			9	1239.61	FL_Alone	0.167	1240.83	0.051664	0.52334	0.069856	6.53605	0.00501
3A3_Heavy	312	321	LHQDWLNGKE			9	1239.61	FL_Alone	1.667	1241.04	0.065191	0.734376	0.080378	6.53712	0.006157
3A3_Heavy	312	321	LHQDWLNGKE			9	1239.61	FL_Alone	16.667	1242.08	0.073399	1.77159	0.087167	6.53038	0.003944
3A3_Heavy	312	321	LHQDWLNGKE			9	1239.61	FL_S2_Complex	0	1240.31	0.047018	0	0	6.533	0.00558
3A3_Heavy	312	321	LHQDWLNGKE			9	1239.61	FL_S2_Complex	0.167	1240.81	0.041932	0.504434	0.063	6.53003	0.006377
3A3_Heavy	312	321	LHQDWLNGKE			9	1239.61	FL_S2_Complex	1.667	1241.14	0.051805	0.831323	0.069961	6.53802	0.0095
3A3_Heavy	312	321	LHQDWLNGKE			9	1239.61	FL_S2_Complex	16.667	1242.08	0.127165	1.76604	0.135579	6.54017	0.010756
3A3_Heavy	322	351	YKCKVSNKALPAPIEKTISKAKGQPREPQV			25	3308.85	FL_Alone	0	3310.84	0.058714	0	0	5.70809	0.005662
3A3_Heavy	322	351	YKCKVSNKALPAPIEKTISKAKGQPREPQV			25	3308.85	FL_Alone	0.167	3315.37	0.031291	4.53752	0.066532	5.70187	0.007681
3A3_Heavy	322	351	YKCKVSNKALPAPIEKTISKAKGQPREPQV			25	3308.85	FL_Alone	1.667	3317.13	0.239837	6.29697	0.246919	5.70817	0.009878
3A3_Heavy	322	351	YKCKVSNKALPAPIEKTISKAKGQPREPQV			25	3308.85	FL_Alone	16.667	3318.38	0.437035	7.54445	0.440962	5.70239	0.012751
3A3_Heavy	322	351	YKCKVSNKALPAPIEKTISKAKGQPREPQV			25	3308.85	FL_S2_Complex	0	3310.84	0.058714	0	0	5.70809	0.005662
3A3_Heavy	322	351	YKCKVSNKALPAPIEKTISKAKGQPREPQV			25	3308.85	FL_S2_Complex	0.167	3315.3	0.479887	4.46881	0.483465	5.70411	0.005406
3A3_Heavy	322	351	YKCKVSNKALPAPIEKTISKAKGQPREPQV			25	3308.85	FL_S2_Complex	1.667	3317.5	0.208651	6.66523	0.216755	5.69854	0.013217
3A3_Heavy	322	351	YKCKVSNKALPAPIEKTISKAKGQPREPQV			25	3308.85	FL_S2_Complex	16.667	3318.66	0.387532	7.82709	0.391955	5.69455	0.009267
3A3_Heavy	337	351	KTISKAKGQPREPQV			12	1666.96	FL_Alone	0	1668.57	0.017345	0	0	4.62045	0.005446
3A3_Heavy	337	351	KTISKAKGQPREPQV			12	1666.96	FL_Alone	0.167	1670.8	0.030056	2.22675	0.034702	4.62067	0.003151
3A3_Heavy	337	351	KTISKAKGQPREPQV			12	1666.96	FL_Alone	1.667	1671.47	0.127455	2.89854	0.128629	4.62554	0.009932
3A3_Heavy	337	351	KTISKAKGQPREPQV			12	1666.96	FL_Alone	16.667	1671.82	0.109345	3.24346	0.110712	4.61658	0.007169
3A3_Heavy	337	351	KTISKAKGQPREPQV			12	1666.96	FL_S2_Complex	0	1668.57	0.017345	0	0	4.62045	0.005446
3A3_Heavy	337	351	KTISKAKGQPREPQV			12	1666.96	FL_S2_Complex	0.167	1670.75	0.096615	2.1797	0.09816	4.61858	0.002175
3A3_Heavy	337	351	KTISKAKGQPREPQV			12	1666.96	FL_S2_Complex	1.667	1671.41	0.083926	2.83658	0.085699	4.61911	0.003045
3A3_Heavy	337	351	KTISKAKGQPREPQV			12	1666.96	FL_S2_Complex	16.667	1671.74	0.071667	3.16909	0.073736	4.61952	0.005938
3A3_Heavy	337	359	KTISKAKGQPREPQVYTLPPSRE			18	2610.44	FL_Alone	0	2612.33	0.02698	0	0	5.3019	0.01264
3A3_Heavy	337	359	KTISKAKGQPREPQVYTLPPSRE			18	2610.44	FL_Alone	0.167	2616.49	0.058588	4.16319	0.064502	5.30694	0.006435
3A3_Heavy	337	359	KTISKAKGQPREPQVYTLPPSRE			18	2610.44	FL_Alone	1.667	2617.41	0.187313	5.08115	0.189246	5.30577	0.006891
3A3_Heavy	337	359	KTISKAKGQPREPQVYTLPPSRE			18	2610.44	FL_Alone	16.667	2617.79	0.085117	5.46139	0.089291	5.30231	0.008571
3A3_Heavy	337	359	KTISKAKGQPREPQVYTLPPSRE			18	2610.44	FL_S2_Complex	0	2612.33	0.028541	0	0	5.30213	0.012649
3A3_Heavy	337	359	KTISKAKGQPREPQVYTLPPSRE			18	2610.44	FL_S2_Complex	0.167	2616.49	0.143757	4.16074	0.146563	5.29597	0.011489
3A3_Heavy	337	359	KTISKAKGQPREPQVYTLPPSRE			18	2610.44	FL_S2_Complex	1.667	2617.31	0.13266	4.98819	0.135695	5.30436	0.007636
3A3_Heavy	337	359	KTISKAKGQPREPQVYTLPPSRE			18	2610.44	FL_S2_Complex	16.667	2617.68	0.12041	5.35378	0.123747	5.31196	0.001528
3A3_Heavy	337	368	KTISKAKGQPREPQVYTLPPSREEMTKNQVSL			27	3640.95	FL_Alone	0	3643.16	0.014473	0	0	5.92173	0.004462
3A3_Heavy	337	368	KTISKAKGQPREPQVYTLPPSREEMTKNQVSL			27	3640.95	FL_Alone	0.167	3650.15	0.113665	6.9897	0.114583	5.93174	0.008893
3A3_Heavy	337	368	KTISKAKGQPREPQVYTLPPSREEMTKNQVSL			27	3640.95	FL_Alone	1.667	3651.28	0.225693	8.12183	0.226157	5.93555	0.008007
3A3_Heavy	337	368	KTISKAKGQPREPQVYTLPPSREEMTKNQVSL			27	3640.95	FL_Alone	16.667	3651.94	0.122856	8.78222	0.123706	5.92838	0.008591
3A3_Heavy	337	368	KTISKAKGQPREPQVYTLPPSREEMTKNQVSL			27	3640.95	FL_S2_Complex	0	3643.16	0.014473	0	0	5.92173	0.004462
3A3_Heavy	337	368	KTISKAKGQPREPQVYTLPPSREEMTKNQVSL			27	3640.95	FL_S2_Complex	0.167	3650.03	0.107978	6.87405	0.108944	5.92567	0.006574
3A3_Heavy	337	368	KTISKAKGQPREPQVYTLPPSREEMTKNQVSL			27	3640.95	FL_S2_Complex	1.667	3651.17	0.132051	8.01831	0.132841	5.92223	0.004324
3A3_Heavy	337	368	KTISKAKGQPREPQVYTLPPSREEMTKNQVSL			27	3640.95	FL_S2_Complex	16.667	3651.94	0.204305	8.78567	0.204817	5.9239	0.002799
3A3_Heavy	338	351	TISKAKGQPREPQV			11	1538.86	FL_Alone	0	1539.71	0.010014	0	0	4.6155	0.003877
3A3_Heavy	338	351	TISKAKGQPREPQV			11	1538.86	FL_Alone	0.167	1542.24	0.010363	2.53771	0.01441	4.61571	0.001629
3A3_Heavy	338	351	TISKAKGQPREPQV			11	1538.86	FL_Alone	1.667	1542.92	0.092029	3.20931	0.092573	4.6199	0.008855
3A3_Heavy	338	351	TISKAKGQPREPQV			11	1538.86	FL_Alone	16.667	1543.21	0.06309	3.49932	0.06388	4.6199	0.006326
3A3_Heavy	338	351	TISKAKGQPREPQV			11	1538.86	FL_S2_Complex	0	1539.71	0.010014	0	0	4.6155	0.003877
3A3_Heavy	338	351	TISKAKGQPREPQV			11	1538.86	FL_S2_Complex	0.167	1542.18	0.105507	2.47119	0.105981	4.61293	0.002367
3A3_Heavy	338	351	TISKAKGQPREPQV			11	1538.86	FL_S2_Complex	1.667	1542.88	0.053896	3.17544	0.054818	4.61502	0.006409
3A3_Heavy	338	351	TISKAKGQPREPQV			11	1538.86	FL_S2_Complex	16.667	1543.18	0.029392	3.47615	0.031051	4.61692	0.004585
3A3_Heavy	339	351	ISKAKGQPREPQV			10	1437.82	FL_Alone	0	1438.59	0.038026	0	0	4.8197	0.004827
3A3_Heavy	339	351	ISKAKGQPREPQV			10	1437.82	FL_Alone	0.167	1441.32	0.032296	2.73635	0.04989	4.81946	0.002215
3A3_Heavy	339	351	ISKAKGQPREPQV			10	1437.82	FL_Alone	1.667	1442	0.095142	3.41183	0.10246	4.82119	0.007239
3A3_Heavy	339	351	ISKAKGQPREPQV			10	1437.82	FL_Alone	16.667	1442.08	0.089398	3.49918	0.097149	4.82287	0.005385
3A3_Heavy	339	351	ISKAKGQPREPQV			10	1437.82	FL_S2_Complex	0	1438.59	0.038026	0	0	4.8197	0.004827
3A3_Heavy	339	351	ISKAKGQPREPQV			10	1437.82	FL_S2_Complex	0.167	1441.3	0.108965	2.71238	0.11541	4.81505	0.001885
3A3_Heavy	339	351	ISKAKGQPREPQV			10	1437.82	FL_S2_Complex	1.667	1441.88	0.070106	3.29206	0.079755	4.81745	0.004677
3A3_Heavy	339	351	ISKAKGQPREPQV			10	1437.82	FL_S2_Complex	16.667	1442.1	0.056716	3.51926	0.068284	4.82243	0.003725
3A3_Heavy	342	351	AKGQPREPQV			7	1109.61	FL_Alone	0	1110.11	0.021725	0	0	4.61534	0.003556
3A3_Heavy	342	351	AKGQPREPQV			7	1109.61	FL_Alone	0.167	1111.83	0.08211	1.72023	0.084935	4.61729	0.001119
3A3_Heavy	342	351	AKGQPREPQV			7	1109.61	FL_Alone	1.667	1112.45	0.099536	2.34202	0.101879	4.6222	0.007728
3A3_Heavy	342	351	AKGQPREPQV			7	1109.61	FL_Alone	16.667	1112.63	0.066756	2.52564	0.070202	4.61974	0.008438
3A3_Heavy	342	351	AKGQPREPQV			7	1109.61	FL_S2_Complex	0	1110.11	0.021725	0	0	4.61534	0.003556
3A3_Heavy	342	351	AKGQPREPQV			7	1109.61	FL_S2_Complex	0.167	1111.84	0.144412	1.73042	0.146037	4.61831	0.003944
3A3_Heavy	342	351	AKGQPREPQV			7	1109.61	FL_S2_Complex	1.667	1112.47	0.052322	2.36296	0.056653	4.61987	0.006466
3A3_Heavy	342	351	AKGQPREPQV			7	1109.61	FL_S2_Complex	16.667	1112.71	0.030335	2.60217	0.037312	4.61952	0.002725
3A3_Heavy	352	364	YTLPPSREEMTKN			10	1565.76	FL_Alone	0	1566.61	0.043796	0	0	5.55439	0.009321
3A3_Heavy	352	364	YTLPPSREEMTKN			10	1565.76	FL_Alone	0.167	1569.8	0.139556	3.19692	0.146267	5.55735	0.004691
3A3_Heavy	352	364	YTLPPSREEMTKN			10	1565.76	FL_Alone	1.667	1570.12	0.071011	3.51193	0.08343	5.56261	0.004554
3A3_Heavy	352	364	YTLPPSREEMTKN			10	1565.76	FL_Alone	16.667	1570.38	0.054246	3.77708	0.069719	5.55414	0.004402
3A3_Heavy	352	364	YTLPPSREEMTKN			10	1565.76	FL_S2_Complex	0	1566.61	0.043796	0	0	5.55439	0.009321
3A3_Heavy	352	364	YTLPPSREEMTKN			10	1565.76	FL_S2_Complex	0.167	1569.83	0.126947	3.22568	0.134289	5.55482	0.004782
3A3_Heavy	352	364	YTLPPSREEMTKN			10	1565.76	FL_S2_Complex	1.667	1570.03	0.047819	3.42163	0.064844	5.56619	0.005112
3A3_Heavy	352	364	YTLPPSREEMTKN			10	1565.76	FL_S2_Complex	16.667	1570.35	0.066415	3.74483	0.079555	5.56572	0.005187
3A3_Heavy	352	370	YTLPPSREEMTKNQVSLTC			16	2197.06	FL_Alone	0	2198.36	0.042302	0	0	6.37576	0.007906
3A3_Heavy	352	370	YTLPPSREEMTKNQVSLTC			16	2197.06	FL_Alone	0.167	2202.93	0.081159	4.56713	0.091522	6.38137	0.004467
3A3_Heavy	352	370	YTLPPSREEMTKNQVSLTC			16	2197.06	FL_Alone	1.667	2203.3	0.148249	4.94326	0.154166	6.37387	0.005806
3A3_Heavy	352	370	YTLPPSREEMTKNQVSLTC			16	2197.06	FL_Alone	16.667	2203.75	0.083878	5.38518	0.093942	6.36855	0.009063
3A3_Heavy	352	370	YTLPPSREEMTKNQVSLTC			16	2197.06	FL_S2_Complex	0	2198.36	0.042302	0	0	6.37576	0.007906
3A3_Heavy	352	370	YTLPPSREEMTKNQVSLTC			16	2197.06	FL_S2_Complex	0.167	2202.82	0.32133	4.46325	0.324102	6.36212	0.005984
3A3_Heavy	352	370	YTLPPSREEMTKNQVSLTC			16	2197.06	FL_S2_Complex	1.667	2203.21	0.136845	4.84399	0.143234	6.36877	0.006549
3A3_Heavy	352	370	YTLPPSREEMTKNQVSLTC			16	2197.06	FL_S2_Complex	16.667	2203.73	0.283234	5.36405	0.286376	6.36683	0.005222
3A3_Heavy	354	359	LPPSRE			3	698.383	FL_Alone	0	698.779	0.029324	0	0	5.60329	0.003524
3A3_Heavy	354	359	LPPSRE			3	698.383	FL_Alone	0.167	699.841	0.015079	1.06212	0.032974	5.59813	0.004798
3A3_Heavy	354	359	LPPSRE			3	698.383	FL_Alone	1.667	699.862	0.02365	1.08298	0.037673	5.60386	0.005357
3A3_Heavy	354	359	LPPSRE			3	698.383	FL_Alone	16.667	699.967	0.029091	1.18863	0.041306	5.60234	0.005759
3A3_Heavy	354	359	LPPSRE			3	698.383	FL_S2_Complex	0	698.779	0.029324	0	0	5.60329	0.003524
3A3_Heavy	354	359	LPPSRE			3	698.383	FL_S2_Complex	0.167	699.811	0.028893	1.03254	0.041167	5.59764	0.002557
3A3_Heavy	354	359	LPPSRE			3	698.383	FL_S2_Complex	1.667	699.811	0.016391	1.03173	0.033594	5.59932	0.00695
3A3_Heavy	354	359	LPPSRE			3	698.383	FL_S2_Complex	16.667	699.933	0.023495	1.15388	0.037575	5.59777	0.004634
3A3_Heavy	360	367	EMTKNQVS			7	936.446	FL_Alone	0	936.966	0.018196	0	0	4.59938	0.005949
3A3_Heavy	360	367	EMTKNQVS			7	936.446	FL_Alone	0.167	939.092	0.030799	2.12669	0.035773	4.59766	0.000467
3A3_Heavy	360	367	EMTKNQVS			7	936.446	FL_Alone	1.667	939.171	0.068916	2.20542	0.071277	4.60203	0.006368
3A3_Heavy	360	367	EMTKNQVS			7	936.446	FL_Alone	16.667	939.189	0.049376	2.22294	0.052622	4.59744	0.005311
3A3_Heavy	360	367	EMTKNQVS			7	936.446	FL_S2_Complex	0	936.966	0.018196	0	0	4.59938	0.005949
3A3_Heavy	360	367	EMTKNQVS			7	936.446	FL_S2_Complex	0.167	939.099	0.055072	2.13374	0.058	4.5978	0.00298
3A3_Heavy	360	367	EMTKNQVS			7	936.446	FL_S2_Complex	1.667	939.182	0.045486	2.21607	0.048991	4.60063	0.006474
3A3_Heavy	360	367	EMTKNQVS			7	936.446	FL_S2_Complex	16.667	939.202	0.037204	2.23633	0.041415	4.60071	0.003913
3A3_Heavy	360	368	EMTKNQVSL			8	1049.53	FL_Alone	0	1050.21	0.015981	0	0	6.13256	0.002259
3A3_Heavy	360	368	EMTKNQVSL			8	1049.53	FL_Alone	0.167	1052.28	0.021227	2.06658	0.026571	6.13373	0.003155
3A3_Heavy	360	368	EMTKNQVSL			8	1049.53	FL_Alone	1.667	1052.34	0.070126	2.12288	0.071924	6.13777	0.005446
3A3_Heavy	360	368	EMTKNQVSL			8	1049.53	FL_Alone	16.667	1052.33	0.044487	2.11582	0.04727	6.13422	0.003593
3A3_Heavy	360	368	EMTKNQVSL			8	1049.53	FL_S2_Complex	0	1050.21	0.015981	0	0	6.13256	0.002259
3A3_Heavy	360	368	EMTKNQVSL			8	1049.53	FL_S2_Complex	0.167	1052.23	0.051108	2.01905	0.053549	6.13301	0.004814
3A3_Heavy	360	368	EMTKNQVSL			8	1049.53	FL_S2_Complex	1.667	1052.31	0.032923	2.09475	0.036597	6.13458	0.006142
3A3_Heavy	360	368	EMTKNQVSL			8	1049.53	FL_S2_Complex	16.667	1052.33	0.027363	2.11604	0.031689	6.13661	0.005175
3A3_Heavy	371	383	LVKGFYPSDIAVE			11	1437.76	FL_Alone	0	1438.59	0.013462	0	0	7.1519	0.002382
3A3_Heavy	371	383	LVKGFYPSDIAVE			11	1437.76	FL_Alone	0.167	1440.26	0.041012	1.67274	0.043165	7.15777	0.00627
3A3_Heavy	371	383	LVKGFYPSDIAVE			11	1437.76	FL_Alone	1.667	1440.56	0.014266	1.96524	0.019615	7.15393	0.006408
3A3_Heavy	371	383	LVKGFYPSDIAVE			11	1437.76	FL_Alone	16.667	1441.4	0.045751	2.8123	0.047691	7.14762	0.004493
3A3_Heavy	371	383	LVKGFYPSDIAVE			11	1437.76	FL_S2_Complex	0	1438.59	0.013462	0	0	7.1519	0.002382
3A3_Heavy	371	383	LVKGFYPSDIAVE			11	1437.76	FL_S2_Complex	0.167	1440.13	0.036938	1.54095	0.039314	7.15604	0.004391
3A3_Heavy	371	383	LVKGFYPSDIAVE			11	1437.76	FL_S2_Complex	1.667	1440.46	0.066634	1.87417	0.06798	7.15541	0.007469
3A3_Heavy	371	383	LVKGFYPSDIAVE			11	1437.76	FL_S2_Complex	16.667	1441.29	0.098853	2.69709	0.099765	7.15468	0.004304
3A3_Heavy	372	379	VKGFYPSD			6	912.446	FL_Alone	0	912.939	0.004669	0	0	6.22192	0.003171
3A3_Heavy	372	379	VKGFYPSD			6	912.446	FL_Alone	0.167	913.693	0.008512	0.754103	0.009709	6.22661	0.003076
3A3_Heavy	372	379	VKGFYPSD			6	912.446	FL_Alone	1.667	913.833	0.034915	0.894426	0.035226	6.2286	0.006193
3A3_Heavy	372	379	VKGFYPSD			6	912.446	FL_Alone	16.667	914.316	0.058866	1.37711	0.059051	6.22567	0.003771
3A3_Heavy	372	379	VKGFYPSD			6	912.446	FL_S2_Complex	0	912.939	0.004669	0	0	6.22192	0.003171
3A3_Heavy	372	379	VKGFYPSD			6	912.446	FL_S2_Complex	0.167	913.648	0.03527	0.709198	0.035578	6.2182	0.002837
3A3_Heavy	372	379	VKGFYPSD			6	912.446	FL_S2_Complex	1.667	913.809	0.028028	0.869729	0.028414	6.22029	0.006028
3A3_Heavy	372	379	VKGFYPSD			6	912.446	FL_S2_Complex	16.667	914.33	0.042129	1.39117	0.042387	6.21962	0.002091
3A3_Heavy	372	383	VKGFYPSDIAVE			10	1324.68	FL_Alone	0	1325.56	0.034941	0	0	6.9762	0.00293
3A3_Heavy	372	383	VKGFYPSDIAVE			10	1324.68	FL_Alone	0.167	1327.06	0.013028	1.49845	0.03729	6.97693	0.003105
3A3_Heavy	372	383	VKGFYPSDIAVE			10	1324.68	FL_Alone	1.667	1327.28	0.036895	1.72373	0.050814	6.97897	0.00335
3A3_Heavy	372	383	VKGFYPSDIAVE			10	1324.68	FL_Alone	16.667	1328.09	0.036831	2.52878	0.050768	6.97363	0.005968
3A3_Heavy	372	383	VKGFYPSDIAVE			10	1324.68	FL_S2_Complex	0	1325.56	0.034941	0	0	6.9762	0.00293
3A3_Heavy	372	383	VKGFYPSDIAVE			10	1324.68	FL_S2_Complex	0.167	1327.06	0.034715	1.49687	0.049254	6.97687	0.002974
3A3_Heavy	372	383	VKGFYPSDIAVE			10	1324.68	FL_S2_Complex	1.667	1327.26	0.013628	1.70075	0.037504	6.9793	0.009259
3A3_Heavy	372	383	VKGFYPSDIAVE			10	1324.68	FL_S2_Complex	16.667	1328.14	0.048069	2.57895	0.059426	6.97716	0.00403
3A3_Heavy	380	393	IAVEWESNGQPENN			12	1586.71	FL_Alone	0	1587.48	0.031797	0	0	6.79621	0.003165
3A3_Heavy	380	393	IAVEWESNGQPENN			12	1586.71	FL_Alone	0.167	1590.84	0.008671	3.36226	0.032958	6.7987	0.002663
3A3_Heavy	380	393	IAVEWESNGQPENN			12	1586.71	FL_Alone	1.667	1591.85	0.097231	4.37203	0.102298	6.80171	0.005011
3A3_Heavy	380	393	IAVEWESNGQPENN			12	1586.71	FL_Alone	16.667	1592.32	0.09393	4.83529	0.099166	6.79673	0.008609
3A3_Heavy	380	393	IAVEWESNGQPENN			12	1586.71	FL_S2_Complex	0	1587.48	0.031797	0	0	6.79621	0.003165
3A3_Heavy	380	393	IAVEWESNGQPENN			12	1586.71	FL_S2_Complex	0.167	1590.76	0.130328	3.27816	0.134151	6.79664	0.006299
3A3_Heavy	380	393	IAVEWESNGQPENN			12	1586.71	FL_S2_Complex	1.667	1591.78	0.136086	4.29894	0.139751	6.8015	0.007226
3A3_Heavy	380	393	IAVEWESNGQPENN			12	1586.71	FL_S2_Complex	16.667	1592.35	0.140253	4.87091	0.143812	6.79349	0.003252
3A3_Heavy	380	401	IAVEWESNGQPENNYKTTPPVL			18	2486.22	FL_Alone	0	2487.82	0.032199	0	0	7.17986	0.006778
3A3_Heavy	380	401	IAVEWESNGQPENNYKTTPPVL			18	2486.22	FL_Alone	0.167	2492.13	0.06518	4.30848	0.072699	7.18762	0.007841
3A3_Heavy	380	401	IAVEWESNGQPENNYKTTPPVL			18	2486.22	FL_Alone	1.667	2493.82	0.151388	6.00172	0.154774	7.18787	0.003906
3A3_Heavy	380	401	IAVEWESNGQPENNYKTTPPVL			18	2486.22	FL_Alone	16.667	2494.54	0.170386	6.72747	0.173402	7.17625	0.006919
3A3_Heavy	380	401	IAVEWESNGQPENNYKTTPPVL			18	2486.22	FL_S2_Complex	0	2487.82	0.032199	0	0	7.17986	0.006778
3A3_Heavy	380	401	IAVEWESNGQPENNYKTTPPVL			18	2486.22	FL_S2_Complex	0.167	2492.06	0.127673	4.23806	0.13167	7.18518	0.002496
3A3_Heavy	380	401	IAVEWESNGQPENNYKTTPPVL			18	2486.22	FL_S2_Complex	1.667	2493.75	0.034711	5.93022	0.047346	7.18776	0.007173
3A3_Heavy	380	401	IAVEWESNGQPENNYKTTPPVL			18	2486.22	FL_S2_Complex	16.667	2494.47	0.13336	6.64961	0.137192	7.18278	0.005453
3A3_Heavy	383	393	EWESNGQPENN			9	1303.52	FL_Alone	0	1304.13	0.022266	0	0	5.81172	0.004553
3A3_Heavy	383	393	EWESNGQPENN			9	1303.52	FL_Alone	0.167	1306.53	0.049857	2.39259	0.054603	5.80793	0.005128
3A3_Heavy	383	393	EWESNGQPENN			9	1303.52	FL_Alone	1.667	1307.48	0.048922	3.34673	0.053751	5.81768	0.006202
3A3_Heavy	383	393	EWESNGQPENN			9	1303.52	FL_Alone	16.667	1307.92	0.069706	3.78618	0.073176	5.81359	0.004863
3A3_Heavy	383	393	EWESNGQPENN			9	1303.52	FL_S2_Complex	0	1304.13	0.022266	0	0	5.81172	0.004553
3A3_Heavy	383	393	EWESNGQPENN			9	1303.52	FL_S2_Complex	0.167	1306.57	0.100232	2.43725	0.102675	5.81388	0.002683
3A3_Heavy	383	393	EWESNGQPENN			9	1303.52	FL_S2_Complex	1.667	1307.36	0.08515	3.22742	0.088013	5.80825	0.009375
3A3_Heavy	383	393	EWESNGQPENN			9	1303.52	FL_S2_Complex	16.667	1307.93	0.027296	3.79577	0.035226	5.81331	0.003492
3A3_Heavy	383	401	EWESNGQPENNYKTTPPVL			15	2203.03	FL_Alone	0	2204.39	0.031094	0	0	6.84124	0.008013
3A3_Heavy	383	401	EWESNGQPENNYKTTPPVL			15	2203.03	FL_Alone	0.167	2207.81	0.034626	3.42363	0.046538	6.84487	0.004116
3A3_Heavy	383	401	EWESNGQPENNYKTTPPVL			15	2203.03	FL_Alone	1.667	2209.56	0.055926	5.17339	0.063989	6.84574	0.00536
3A3_Heavy	383	401	EWESNGQPENNYKTTPPVL			15	2203.03	FL_Alone	16.667	2210.11	0.06973	5.72178	0.076349	6.83713	0.005131
3A3_Heavy	383	401	EWESNGQPENNYKTTPPVL			15	2203.03	FL_S2_Complex	0	2204.39	0.031094	0	0	6.84124	0.008013
3A3_Heavy	383	401	EWESNGQPENNYKTTPPVL			15	2203.03	FL_S2_Complex	0.167	2207.76	0.060357	3.37625	0.067895	6.8329	0.004286
3A3_Heavy	383	401	EWESNGQPENNYKTTPPVL			15	2203.03	FL_S2_Complex	1.667	2209.45	0.049281	5.06047	0.05827	6.83806	0.008407
3A3_Heavy	383	401	EWESNGQPENNYKTTPPVL			15	2203.03	FL_S2_Complex	16.667	2210.06	0.041471	5.67152	0.051833	6.83988	0.01068
3A3_Heavy	384	393	WESNGQPENN			8	1174.48	FL_Alone	0	1175.1	0.019403	0	0	5.53089	0.003734
3A3_Heavy	384	393	WESNGQPENN			8	1174.48	FL_Alone	0.167	1177.51	0.023431	2.41682	0.030422	5.52862	0.004002
3A3_Heavy	384	393	WESNGQPENN			8	1174.48	FL_Alone	1.667	1178.32	0.048571	3.22498	0.052303	5.54133	0.007128
3A3_Heavy	384	393	WESNGQPENN			8	1174.48	FL_Alone	16.667	1178.74	0.058091	3.64109	0.061245	5.533	0.005537
3A3_Heavy	384	393	WESNGQPENN			8	1174.48	FL_S2_Complex	0	1175.1	0.019403	0	0	5.53089	0.003734
3A3_Heavy	384	393	WESNGQPENN			8	1174.48	FL_S2_Complex	0.167	1177.5	0.053541	2.40321	0.056948	5.52947	0.001785
3A3_Heavy	384	393	WESNGQPENN			8	1174.48	FL_S2_Complex	1.667	1178.3	0.039141	3.20394	0.043687	5.53247	0.005536
3A3_Heavy	384	393	WESNGQPENN			8	1174.48	FL_S2_Complex	16.667	1178.69	0.050633	3.59141	0.054224	5.53242	0.004654
3A3_Heavy	384	401	WESNGQPENNYKTTPPVL			14	2073.99	FL_Alone	0	2075.42	0.034379	0	0	6.76871	0.011344
3A3_Heavy	384	401	WESNGQPENNYKTTPPVL			14	2073.99	FL_Alone	0.167	2078.59	0.044555	3.17393	0.056276	6.77216	0.007342
3A3_Heavy	384	401	WESNGQPENNYKTTPPVL			14	2073.99	FL_Alone	1.667	2080.21	0.040664	4.78997	0.053249	6.76997	0.005339
3A3_Heavy	384	401	WESNGQPENNYKTTPPVL			14	2073.99	FL_Alone	16.667	2080.69	0.068887	5.27161	0.076989	6.76415	0.009727
3A3_Heavy	384	401	WESNGQPENNYKTTPPVL			14	2073.99	FL_S2_Complex	0	2075.42	0.034379	0	0	6.76871	0.011344
3A3_Heavy	384	401	WESNGQPENNYKTTPPVL			14	2073.99	FL_S2_Complex	0.167	2078.52	0.041166	3.10498	0.053634	6.76038	0.003655
3A3_Heavy	384	401	WESNGQPENNYKTTPPVL			14	2073.99	FL_S2_Complex	1.667	2080.08	0.046408	4.66531	0.057755	6.76045	0.007475
3A3_Heavy	384	401	WESNGQPENNYKTTPPVL			14	2073.99	FL_S2_Complex	16.667	2080.53	0.022134	5.11447	0.040888	6.77139	0.00228
3A3_Heavy	385	401	ESNGQPENNYKTTPPVL			13	1887.91	FL_Alone	0	1888.89	0.011061	0	0	6.42318	0.00385
3A3_Heavy	385	401	ESNGQPENNYKTTPPVL			13	1887.91	FL_Alone	0.167	1891.97	0.053018	3.08053	0.054159	6.42766	0.005935
3A3_Heavy	385	401	ESNGQPENNYKTTPPVL			13	1887.91	FL_Alone	1.667	1893.42	0.085601	4.52877	0.086312	6.43101	0.006957
3A3_Heavy	385	401	ESNGQPENNYKTTPPVL			13	1887.91	FL_Alone	16.667	1893.81	0.084485	4.92618	0.085206	6.4268	0.003883
3A3_Heavy	385	401	ESNGQPENNYKTTPPVL			13	1887.91	FL_S2_Complex	0	1888.89	0.011061	0	0	6.42318	0.00385
3A3_Heavy	385	401	ESNGQPENNYKTTPPVL			13	1887.91	FL_S2_Complex	0.167	1891.97	0.086078	3.08443	0.086786	6.42171	0.005466
3A3_Heavy	385	401	ESNGQPENNYKTTPPVL			13	1887.91	FL_S2_Complex	1.667	1893.45	0.101687	4.56496	0.102287	6.42199	0.006692
3A3_Heavy	385	401	ESNGQPENNYKTTPPVL			13	1887.91	FL_S2_Complex	16.667	1893.75	0.04802	4.86462	0.049277	6.42186	0.004137
3A3_Heavy	394	401	YKTTPPVL			5	918.529	FL_Alone	0	919.098	0.018858	0	0	6.33618	0.004121
3A3_Heavy	394	401	YKTTPPVL			5	918.529	FL_Alone	0.167	919.816	0.01005	0.717502	0.021369	6.33931	0.006247
3A3_Heavy	394	401	YKTTPPVL			5	918.529	FL_Alone	1.667	920.311	0.007973	1.21289	0.020475	6.33808	0.00739
3A3_Heavy	394	401	YKTTPPVL			5	918.529	FL_Alone	16.667	920.364	0.013153	1.26545	0.022992	6.33786	0.003759
3A3_Heavy	394	401	YKTTPPVL			5	918.529	FL_S2_Complex	0	919.098	0.018858	0	0	6.33618	0.004121
3A3_Heavy	394	401	YKTTPPVL			5	918.529	FL_S2_Complex	0.167	919.792	0.036601	0.693586	0.041174	6.33484	0.005844
3A3_Heavy	394	401	YKTTPPVL			5	918.529	FL_S2_Complex	1.667	920.27	0.015158	1.17162	0.024195	6.33929	0.006345
3A3_Heavy	394	401	YKTTPPVL			5	918.529	FL_S2_Complex	16.667	920.355	0.016534	1.25636	0.02508	6.33727	0.008474
3A3_Heavy	395	401	KTTPPVL			4	755.466	FL_Alone	0	755.82	0.008565	0	0	5.97777	0.006177
3A3_Heavy	395	401	KTTPPVL			4	755.466	FL_Alone	0.167	756.028	0.024579	0.207844	0.026028	5.97928	0.003039
3A3_Heavy	395	401	KTTPPVL			4	755.466	FL_Alone	1.667	756.539	0.006009	0.719124	0.010462	5.97998	0.004912
3A3_Heavy	395	401	KTTPPVL			4	755.466	FL_Alone	16.667	756.619	0.017874	0.798842	0.01982	5.97674	0.005861
3A3_Heavy	395	401	KTTPPVL			4	755.466	FL_S2_Complex	0	755.82	0.008565	0	0	5.97777	0.006177
3A3_Heavy	395	401	KTTPPVL			4	755.466	FL_S2_Complex	0.167	756.059	0.016909	0.239426	0.018954	5.97479	0.004882
3A3_Heavy	395	401	KTTPPVL			4	755.466	FL_S2_Complex	1.667	756.552	0.011581	0.732634	0.014404	5.97879	0.006477
3A3_Heavy	395	401	KTTPPVL			4	755.466	FL_S2_Complex	16.667	756.658	0.017907	0.83869	0.01985	5.98014	0.005542
3A3_Heavy	402	407	DSDGSF			5	627.226	FL_Alone	0	627.962	0.031483	0	0	6.36457	0.004728
3A3_Heavy	402	407	DSDGSF			5	627.226	FL_Alone	0.167	628.544	0.027831	0.581678	0.042021	6.36025	0.007279
3A3_Heavy	402	407	DSDGSF			5	627.226	FL_Alone	1.667	628.549	0.021008	0.586891	0.037848	6.36629	0.004066
3A3_Heavy	402	407	DSDGSF			5	627.226	FL_Alone	16.667	628.588	0.026069	0.625496	0.040875	6.36272	0.005694
3A3_Heavy	402	407	DSDGSF			5	627.226	FL_S2_Complex	0	627.962	0.031483	0	0	6.36457	0.004728
3A3_Heavy	402	407	DSDGSF			5	627.226	FL_S2_Complex	0.167	628.464	0.026834	0.501531	0.041367	6.35878	0.003413
3A3_Heavy	402	407	DSDGSF			5	627.226	FL_S2_Complex	1.667	628.464	0.012189	0.501458	0.03376	6.36294	0.006998
3A3_Heavy	402	407	DSDGSF			5	627.226	FL_S2_Complex	16.667	628.503	0.025694	0.540359	0.040637	6.36302	0.00479
3A3_Heavy	402	408	DSDGSFF			6	774.294	FL_Alone	0	774.676	0.019614	0	0	8.0393	0.002977
3A3_Heavy	402	408	DSDGSFF			6	774.294	FL_Alone	0.167	775.463	0.028376	0.787621	0.034495	8.05361	0.005473
3A3_Heavy	402	408	DSDGSFF			6	774.294	FL_Alone	1.667	775.496	0.016071	0.819818	0.025357	8.04459	0.007755
3A3_Heavy	402	408	DSDGSFF			6	774.294	FL_Alone	16.667	775.52	0.040763	0.844637	0.045237	8.04358	0.010327
3A3_Heavy	402	408	DSDGSFF			6	774.294	FL_S2_Complex	0	774.676	0.019614	0	0	8.0393	0.002977
3A3_Heavy	402	408	DSDGSFF			6	774.294	FL_S2_Complex	0.167	775.406	0.05476	0.729882	0.058167	8.05015	0.006219
3A3_Heavy	402	408	DSDGSFF			6	774.294	FL_S2_Complex	1.667	775.441	0.02358	0.765711	0.030672	8.0523	0.005688
3A3_Heavy	402	408	DSDGSFF			6	774.294	FL_S2_Complex	16.667	775.462	0.04179	0.786276	0.046164	8.05291	0.005059
3A3_Heavy	408	413	FLYSKL			5	770.445	FL_Alone	0	771.079	0.03424	0	0	7.00859	0.00743
3A3_Heavy	408	413	FLYSKL			5	770.445	FL_Alone	0.167	771.197	0.027631	0.117999	0.043999	7.02278	0.005258
3A3_Heavy	408	413	FLYSKL			5	770.445	FL_Alone	1.667	771.198	0.020159	0.119077	0.039734	7.02177	0.004286
3A3_Heavy	408	413	FLYSKL			5	770.445	FL_Alone	16.667	771.177	0.012369	0.098856	0.036406	7.01616	0.007519
3A3_Heavy	408	413	FLYSKL			5	770.445	FL_S2_Complex	0	771.079	0.03424	0	0	7.00859	0.00743
3A3_Heavy	408	413	FLYSKL			5	770.445	FL_S2_Complex	0.167	771.103	0.040418	0.024089	0.052972	7.01211	0.003443
3A3_Heavy	408	413	FLYSKL			5	770.445	FL_S2_Complex	1.667	771.107	0.016228	0.028731	0.037891	7.01968	0.008339
3A3_Heavy	408	413	FLYSKL			5	770.445	FL_S2_Complex	16.667	771.097	0.020042	0.018789	0.039675	7.01732	0.007477
3A3_Heavy	414	425	TVDKSRWQQGNV			11	1417.72	FL_Alone	0	1418.66	0.037386	0	0	5.64778	0.005635
3A3_Heavy	414	425	TVDKSRWQQGNV			11	1417.72	FL_Alone	0.167	1421.42	0.034823	2.75525	0.051092	5.64832	0.00321
3A3_Heavy	414	425	TVDKSRWQQGNV			11	1417.72	FL_Alone	1.667	1422.24	0.101791	3.5803	0.108439	5.65446	0.004375
3A3_Heavy	414	425	TVDKSRWQQGNV			11	1417.72	FL_Alone	16.667	1423.09	0.106768	4.42567	0.113124	5.64622	0.005888
3A3_Heavy	414	425	TVDKSRWQQGNV			11	1417.72	FL_S2_Complex	0	1418.66	0.037386	0	0	5.64778	0.005635
3A3_Heavy	414	425	TVDKSRWQQGNV			11	1417.72	FL_S2_Complex	0.167	1421.36	0.071315	2.69468	0.08052	5.64247	0.005372
3A3_Heavy	414	425	TVDKSRWQQGNV			11	1417.72	FL_S2_Complex	1.667	1422.26	0.052976	3.59511	0.064839	5.64689	0.008826
3A3_Heavy	414	425	TVDKSRWQQGNV			11	1417.72	FL_S2_Complex	16.667	1423.11	0.059177	4.44605	0.069997	5.65136	0.005392
3A3_Heavy	414	426	TVDKSRWQQGNVF			12	1564.79	FL_Alone	0	1565.69	0.013315	0	0	6.63844	0.004916
3A3_Heavy	414	426	TVDKSRWQQGNVF			12	1564.79	FL_Alone	0.167	1568.82	0.035082	3.13227	0.037524	6.64282	0.005761
3A3_Heavy	414	426	TVDKSRWQQGNVF			12	1564.79	FL_Alone	1.667	1569.78	0.094866	4.08978	0.095796	6.64419	0.003899
3A3_Heavy	414	426	TVDKSRWQQGNVF			12	1564.79	FL_Alone	16.667	1570.7	0.123101	5.01197	0.123819	6.63675	0.001807
3A3_Heavy	414	426	TVDKSRWQQGNVF			12	1564.79	FL_S2_Complex	0	1565.69	0.013315	0	0	6.63844	0.004916
3A3_Heavy	414	426	TVDKSRWQQGNVF			12	1564.79	FL_S2_Complex	0.167	1568.8	0.108138	3.10446	0.108955	6.63756	0.003846
3A3_Heavy	414	426	TVDKSRWQQGNVF			12	1564.79	FL_S2_Complex	1.667	1569.71	0.040672	4.02235	0.042796	6.64342	0.009038
3A3_Heavy	414	426	TVDKSRWQQGNVF			12	1564.79	FL_S2_Complex	16.667	1570.62	0.0858	4.93066	0.086827	6.64008	0.008203
3A3_Heavy	427	449	SCSVMHEALHNHYTQKSLSLSPG			21	2526.19	FL_Alone	0	2527.74	0.006351	0	0	6.22775	0.002023
3A3_Heavy	427	449	SCSVMHEALHNHYTQKSLSLSPG			21	2526.19	FL_Alone	0.167	2531.24	0.09242	3.50042	0.092638	6.22816	0.005124
3A3_Heavy	427	449	SCSVMHEALHNHYTQKSLSLSPG			21	2526.19	FL_Alone	1.667	2532.17	0.107447	4.4341	0.107634	6.2324	0.008321
3A3_Heavy	427	449	SCSVMHEALHNHYTQKSLSLSPG			21	2526.19	FL_Alone	16.667	2533.16	0.150368	5.42726	0.150502	6.22691	0.003146
3A3_Heavy	427	449	SCSVMHEALHNHYTQKSLSLSPG			21	2526.19	FL_S2_Complex	0	2527.74	0.006351	0	0	6.22775	0.002023
3A3_Heavy	427	449	SCSVMHEALHNHYTQKSLSLSPG			21	2526.19	FL_S2_Complex	0.167	2531.15	0.125841	3.41278	0.126001	6.22354	0.006653
3A3_Heavy	427	449	SCSVMHEALHNHYTQKSLSLSPG			21	2526.19	FL_S2_Complex	1.667	2532.12	0.076829	4.38518	0.077091	6.22122	0.003858
3A3_Heavy	427	449	SCSVMHEALHNHYTQKSLSLSPG			21	2526.19	FL_S2_Complex	16.667	2533.2	0.13469	5.46672	0.13484	6.22446	0.004961
3A3_Heavy	430	449	VMHEALHNHYTQKSLSLSPG			18	2249.11	FL_Alone	0	2250.38	0.141655	0	0	5.71204	0.005902
3A3_Heavy	430	449	VMHEALHNHYTQKSLSLSPG			18	2249.11	FL_Alone	0.167	2253.58	0.081848	3.20593	0.1636	5.71018	0.008634
3A3_Heavy	430	449	VMHEALHNHYTQKSLSLSPG			18	2249.11	FL_Alone	1.667	2254.56	0.089062	4.18736	0.167326	5.71571	0.009933
3A3_Heavy	430	449	VMHEALHNHYTQKSLSLSPG			18	2249.11	FL_Alone	16.667	2255.42	0.232538	5.04113	0.272286	5.71477	0.005732
3A3_Heavy	430	449	VMHEALHNHYTQKSLSLSPG			18	2249.11	FL_S2_Complex	0	2250.38	0.141655	0	0	5.71204	0.005902
3A3_Heavy	430	449	VMHEALHNHYTQKSLSLSPG			18	2249.11	FL_S2_Complex	0.167	2253.56	0.110306	3.18189	0.179537	5.71335	0.007255
3A3_Heavy	430	449	VMHEALHNHYTQKSLSLSPG			18	2249.11	FL_S2_Complex	1.667	2254.5	0.069459	4.12178	0.157767	5.71011	0.006495
3A3_Heavy	430	449	VMHEALHNHYTQKSLSLSPG			18	2249.11	FL_S2_Complex	16.667	2255.43	0.332021	5.05309	0.360976	5.71287	0.005779
3A3_Heavy	432	449	HEALHNHYTQKSLSLSPG			16	2019	FL_Alone	0	2020.37	0.030637	0	0	5.51445	0.005857
3A3_Heavy	432	449	HEALHNHYTQKSLSLSPG			16	2019	FL_Alone	0.167	2023.07	0.025156	2.6952	0.039641	5.50727	0.008646
3A3_Heavy	432	449	HEALHNHYTQKSLSLSPG			16	2019	FL_Alone	1.667	2023.79	0.10103	3.41741	0.105573	5.52205	0.009518
3A3_Heavy	432	449	HEALHNHYTQKSLSLSPG			16	2019	FL_Alone	16.667	2024.37	0.095992	3.99329	0.100762	5.51436	0.010589
3A3_Heavy	432	449	HEALHNHYTQKSLSLSPG			16	2019	FL_S2_Complex	0	2020.37	0.030637	0	0	5.51445	0.005857
3A3_Heavy	432	449	HEALHNHYTQKSLSLSPG			16	2019	FL_S2_Complex	0.167	2023.02	0.093914	2.64242	0.098784	5.50276	0.004238
3A3_Heavy	432	449	HEALHNHYTQKSLSLSPG			16	2019	FL_S2_Complex	1.667	2023.8	0.064831	3.42754	0.071705	5.50443	0.004656
3A3_Heavy	432	449	HEALHNHYTQKSLSLSPG			16	2019	FL_S2_Complex	16.667	2024.33	0.074593	3.95409	0.080639	5.50599	0.004117
3A3_Heavy	432	450	HEALHNHYTQKSLSLSPGK			17	2147.1	FL_Alone	0	2148.31	0.049255	0	0	5.25594	0.007343
3A3_Heavy	432	450	HEALHNHYTQKSLSLSPGK			17	2147.1	FL_Alone	0.167	2151.6	0.083488	3.28062	0.096934	5.25063	0.009392
3A3_Heavy	432	450	HEALHNHYTQKSLSLSPGK			17	2147.1	FL_Alone	1.667	2152.31	0.13287	3.99553	0.141706	5.25884	0.006772
3A3_Heavy	432	450	HEALHNHYTQKSLSLSPGK			17	2147.1	FL_Alone	16.667	2152.92	0.108472	4.60621	0.119131	5.25468	0.004036
3A3_Heavy	432	450	HEALHNHYTQKSLSLSPGK			17	2147.1	FL_S2_Complex	0	2148.31	0.049255	0	0	5.25594	0.007343
3A3_Heavy	432	450	HEALHNHYTQKSLSLSPGK			17	2147.1	FL_S2_Complex	0.167	2151.62	0.187752	3.30394	0.194105	5.24864	0.004896
3A3_Heavy	432	450	HEALHNHYTQKSLSLSPGK			17	2147.1	FL_S2_Complex	1.667	2152.32	0.246921	4.0022	0.251786	5.25161	0.011493
3A3_Heavy	432	450	HEALHNHYTQKSLSLSPGK			17	2147.1	FL_S2_Complex	16.667	2152.88	0.120789	4.56947	0.130445	5.25166	0.011652
3A3_Heavy	434	449	ALHNHYTQKSLSLSPG			14	1752.9	FL_Alone	0	1753.99	0.038959	0	0	5.65988	0.003728
3A3_Heavy	434	449	ALHNHYTQKSLSLSPG			14	1752.9	FL_Alone	0.167	1756.63	0.015496	2.64791	0.041928	5.66162	0.003546
3A3_Heavy	434	449	ALHNHYTQKSLSLSPG			14	1752.9	FL_Alone	1.667	1757.46	0.061443	3.47067	0.072753	5.66351	0.005513
3A3_Heavy	434	449	ALHNHYTQKSLSLSPG			14	1752.9	FL_Alone	16.667	1757.84	0.069801	3.84922	0.079937	5.6568	0.006478
3A3_Heavy	434	449	ALHNHYTQKSLSLSPG			14	1752.9	FL_S2_Complex	0	1753.99	0.038959	0	0	5.65988	0.003728
3A3_Heavy	434	449	ALHNHYTQKSLSLSPG			14	1752.9	FL_S2_Complex	0.167	1756.64	0.090798	2.65642	0.098803	5.65977	0.006842
3A3_Heavy	434	449	ALHNHYTQKSLSLSPG			14	1752.9	FL_S2_Complex	1.667	1757.39	0.038165	3.40102	0.054538	5.6637	0.011778
3A3_Heavy	434	449	ALHNHYTQKSLSLSPG			14	1752.9	FL_S2_Complex	16.667	1757.85	0.053764	3.86065	0.066395	5.6618	0.007105
3A3_Heavy	436	449	HNHYTQKSLSLSPG			12	1568.78	FL_Alone	0	1570.16	0.133957	0	0	5.48551	0.00649
3A3_Heavy	436	449	HNHYTQKSLSLSPG			12	1568.78	FL_Alone	0.167	1572.44	0.031532	2.28633	0.137618	5.47621	0.002888
3A3_Heavy	436	449	HNHYTQKSLSLSPG			12	1568.78	FL_Alone	1.667	1573.17	0.087436	3.01366	0.159967	5.4756	0.003288
3A3_Heavy	436	449	HNHYTQKSLSLSPG			12	1568.78	FL_Alone	16.667	1573.53	0.093767	3.36846	0.163513	5.47465	0.006827
3A3_Heavy	436	449	HNHYTQKSLSLSPG			12	1568.78	FL_S2_Complex	0	1570.16	0.133957	0	0	5.48551	0.00649
3A3_Heavy	436	449	HNHYTQKSLSLSPG			12	1568.78	FL_S2_Complex	0.167	1572.44	0.061297	2.2791	0.147315	5.46639	0.005264
3A3_Heavy	436	449	HNHYTQKSLSLSPG			12	1568.78	FL_S2_Complex	1.667	1573.12	0.042141	2.96356	0.140429	5.4722	0.009419
3A3_Heavy	436	449	HNHYTQKSLSLSPG			12	1568.78	FL_S2_Complex	16.667	1573.51	0.07075	3.35424	0.151493	5.47388	0.00709
3A3_Heavy	436	450	HNHYTQKSLSLSPGK			13	1696.88	FL_Alone	0	1697.77	0.027458	0	0	5.12807	0.002985
3A3_Heavy	436	450	HNHYTQKSLSLSPGK			13	1696.88	FL_Alone	0.167	1700.98	0.035414	3.20901	0.044812	5.12514	0.005326
3A3_Heavy	436	450	HNHYTQKSLSLSPGK			13	1696.88	FL_Alone	1.667	1701.64	0.070497	3.87023	0.075656	5.13551	0.007016
3A3_Heavy	436	450	HNHYTQKSLSLSPGK			13	1696.88	FL_Alone	16.667	1701.99	0.119048	4.22747	0.122174	5.1352	0.004238
3A3_Heavy	436	450	HNHYTQKSLSLSPGK			13	1696.88	FL_S2_Complex	0	1697.77	0.027458	0	0	5.12807	0.002985
3A3_Heavy	436	450	HNHYTQKSLSLSPGK			13	1696.88	FL_S2_Complex	0.167	1700.96	0.082819	3.19149	0.087252	5.12759	0.003371
3A3_Heavy	436	450	HNHYTQKSLSLSPGK			13	1696.88	FL_S2_Complex	1.667	1701.57	0.049721	3.80541	0.056799	5.12669	0.006224
3A3_Heavy	436	450	HNHYTQKSLSLSPGK			13	1696.88	FL_S2_Complex	16.667	1702.02	0.027776	4.25437	0.039057	5.1276	0.00428
3A3_Light	5	18	TQSAPSVPVTPGES			10	1356.66	FL_Alone	0	1357.77	0.049375	0	0	5.86613	0.004273
3A3_Light	5	18	TQSAPSVPVTPGES			10	1356.66	FL_Alone	0.167	1360.28	0.048545	2.50544	0.069242	5.8609	0.006118
3A3_Light	5	18	TQSAPSVPVTPGES			10	1356.66	FL_Alone	1.667	1361.49	0.088807	3.71275	0.10161	5.85954	0.004306
3A3_Light	5	18	TQSAPSVPVTPGES			10	1356.66	FL_Alone	16.667	1362.01	0.088757	4.23686	0.101567	5.85712	0.004254
3A3_Light	5	18	TQSAPSVPVTPGES			10	1356.66	FL_S2_Complex	0	1357.77	0.049375	0	0	5.86613	0.004273
3A3_Light	5	18	TQSAPSVPVTPGES			10	1356.66	FL_S2_Complex	0.167	1360.28	0.080013	2.50478	0.094021	5.85263	0.006515
3A3_Light	5	18	TQSAPSVPVTPGES			10	1356.66	FL_S2_Complex	1.667	1361.45	0.071839	3.67292	0.087171	5.86088	0.008704
3A3_Light	5	18	TQSAPSVPVTPGES			10	1356.66	FL_S2_Complex	16.667	1362.05	0.027937	4.2784	0.056731	5.85674	0.007965
3A3_Light	5	20	TQSAPSVPVTPGESVS			12	1542.76	FL_Alone	0	1542.47	0.016847	0	0	6.06095	0.005557
3A3_Light	5	20	TQSAPSVPVTPGESVS			12	1542.76	FL_Alone	0.167	1544.96	0.061975	2.4918	0.064224	6.06358	0.007086
3A3_Light	5	20	TQSAPSVPVTPGESVS			12	1542.76	FL_Alone	1.667	1545.64	0.067193	3.17138	0.069272	6.05761	0.004598
3A3_Light	5	20	TQSAPSVPVTPGESVS			12	1542.76	FL_Alone	16.667	1545.9	0.041108	3.42407	0.044426	6.05447	0.006963
3A3_Light	5	20	TQSAPSVPVTPGESVS			12	1542.76	FL_S2_Complex	0	1542.34	0.117944	0	0	6.06043	0.004987
3A3_Light	5	20	TQSAPSVPVTPGESVS			12	1542.76	FL_S2_Complex	0.167	1544.94	0.042324	2.5981	0.125309	6.05422	0.00743
3A3_Light	5	20	TQSAPSVPVTPGESVS			12	1542.76	FL_S2_Complex	1.667	1545.52	0.053044	3.17745	0.129324	6.06442	0.011539
3A3_Light	5	20	TQSAPSVPVTPGESVS			12	1542.76	FL_S2_Complex	16.667	1545.88	0.041685	3.54197	0.125094	6.0596	0.009944
3A3_Light	9	18	PSVPVTPGES			6	969.489	FL_Alone	0	969.107	0.079678	0	0	5.85642	0.004477
3A3_Light	9	18	PSVPVTPGES			6	969.489	FL_Alone	0.167	970.865	0.019203	1.75814	0.081959	5.85615	0.004162
3A3_Light	9	18	PSVPVTPGES			6	969.489	FL_Alone	1.667	971.702	0.063913	2.59557	0.102144	5.85707	0.005091
3A3_Light	9	18	PSVPVTPGES			6	969.489	FL_Alone	16.667	972.047	0.044724	2.94063	0.091372	5.85523	0.003525
3A3_Light	9	18	PSVPVTPGES			6	969.489	FL_S2_Complex	0	969.098	0.06544	0	0	5.85643	0.004481
3A3_Light	9	18	PSVPVTPGES			6	969.489	FL_S2_Complex	0.167	970.865	0.076647	1.76745	0.100783	5.84845	0.004897
3A3_Light	9	18	PSVPVTPGES			6	969.489	FL_S2_Complex	1.667	971.704	0.021639	2.60654	0.068925	5.85125	0.006823
3A3_Light	9	18	PSVPVTPGES			6	969.489	FL_S2_Complex	16.667	972.09	0.019899	2.99263	0.068399	5.85091	0.007552
3A3_Light	12	18	PVTPGES			4	686.336	FL_Alone	0	686.954	0.067588	0	0	5.86929	0.009191
3A3_Light	12	18	PVTPGES			4	686.336	FL_Alone	0.167	688.155	0.069859	1.20154	0.097203	5.85779	0.006785
3A3_Light	12	18	PVTPGES			4	686.336	FL_Alone	1.667	688.7	0.02407	1.74591	0.071747	5.8563	0.004277
3A3_Light	12	18	PVTPGES			4	686.336	FL_Alone	16.667	689.029	0.057832	2.07494	0.088954	5.85428	0.00346
3A3_Light	12	18	PVTPGES			4	686.336	FL_S2_Complex	0	686.954	0.067588	0	0	5.86929	0.009191
3A3_Light	12	18	PVTPGES			4	686.336	FL_S2_Complex	0.167	688.054	0.037966	1.09986	0.077522	5.85336	0.005882
3A3_Light	12	18	PVTPGES			4	686.336	FL_S2_Complex	1.667	688.646	0.036381	1.69182	0.076758	5.85867	0.007329
3A3_Light	12	18	PVTPGES			4	686.336	FL_S2_Complex	16.667	688.993	0.0185	2.03924	0.070075	5.85605	0.008117
3A3_Light	24	38	RSSKSLLHSNGNTYL			14	1676.87	FL_Alone	0	1677.75	0.023997	0	0	5.96712	0.006733
3A3_Light	24	38	RSSKSLLHSNGNTYL			14	1676.87	FL_Alone	0.167	1679.49	0.061553	1.73685	0.066065	5.9707	0.00579
3A3_Light	24	38	RSSKSLLHSNGNTYL			14	1676.87	FL_Alone	1.667	1680.27	0.161595	2.52113	0.163368	5.96978	0.006584
3A3_Light	24	38	RSSKSLLHSNGNTYL			14	1676.87	FL_Alone	16.667	1681.25	0.26145	3.49676	0.262549	5.96547	0.007036
3A3_Light	24	38	RSSKSLLHSNGNTYL			14	1676.87	FL_S2_Complex	0	1677.75	0.023997	0	0	5.96712	0.006733
3A3_Light	24	38	RSSKSLLHSNGNTYL			14	1676.87	FL_S2_Complex	0.167	1679.4	0.068145	1.64399	0.072246	5.96003	0.005779
3A3_Light	24	38	RSSKSLLHSNGNTYL			14	1676.87	FL_S2_Complex	1.667	1680.04	0.078681	2.29216	0.082259	5.96922	0.007703
3A3_Light	24	38	RSSKSLLHSNGNTYL			14	1676.87	FL_S2_Complex	16.667	1681.15	0.160733	3.3983	0.162515	5.96684	0.006174
3A3_Light	31	37	HSNGNTY			6	792.327	FL_Alone	0	792.725	0.011658	0	0	4.71949	0.004444
3A3_Light	31	37	HSNGNTY			6	792.327	FL_Alone	0.167	793.673	0.017104	0.947907	0.020699	4.71908	0.001002
3A3_Light	31	37	HSNGNTY			6	792.327	FL_Alone	1.667	794.153	0.041686	1.42744	0.043286	4.7263	0.007565
3A3_Light	31	37	HSNGNTY			6	792.327	FL_Alone	16.667	794.272	0.019759	1.54652	0.022942	4.72152	0.005027
3A3_Light	31	37	HSNGNTY			6	792.327	FL_S2_Complex	0	792.725	0.011658	0	0	4.71949	0.004444
3A3_Light	31	37	HSNGNTY			6	792.327	FL_S2_Complex	0.167	793.59	0.042779	0.864693	0.044339	4.7158	0.002908
3A3_Light	31	37	HSNGNTY			6	792.327	FL_S2_Complex	1.667	794.074	0.039153	1.34881	0.040852	4.71678	0.007758
3A3_Light	31	37	HSNGNTY			6	792.327	FL_S2_Complex	16.667	794.244	0.026469	1.51831	0.028922	4.71945	0.004892
3A3_Light	31	38	HSNGNTYL			7	905.411	FL_Alone	0	906.335	0.024876	0	0	6.10043	0.006
3A3_Light	31	38	HSNGNTYL			7	905.411	FL_Alone	0.167	906.925	0.0173	0.590149	0.030301	6.10356	0.005012
3A3_Light	31	38	HSNGNTYL			7	905.411	FL_Alone	1.667	907.31	0.028713	0.974763	0.037991	6.10657	0.002275
3A3_Light	31	38	HSNGNTYL			7	905.411	FL_Alone	16.667	907.453	0.018916	1.11783	0.031251	6.1025	0.004119
3A3_Light	31	38	HSNGNTYL			7	905.411	FL_S2_Complex	0	906.335	0.024876	0	0	6.10043	0.006
3A3_Light	31	38	HSNGNTYL			7	905.411	FL_S2_Complex	0.167	906.788	0.043071	0.453567	0.049739	6.09972	0.00388
3A3_Light	31	38	HSNGNTYL			7	905.411	FL_S2_Complex	1.667	907.165	0.050471	0.829892	0.056269	6.10294	0.007076
3A3_Light	31	38	HSNGNTYL			7	905.411	FL_S2_Complex	16.667	907.363	0.026457	1.02852	0.036315	6.10232	0.004053
3A3_Light	31	40	HSNGNTYLYW			9	1254.55	FL_Alone	0	1255.18	0.026235	0	0	7.75158	0.006276
3A3_Light	31	40	HSNGNTYLYW			9	1254.55	FL_Alone	0.167	1256.09	0.052715	0.90808	0.058883	7.76758	0.008289
3A3_Light	31	40	HSNGNTYLYW			9	1254.55	FL_Alone	1.667	1256.58	0.042182	1.39849	0.049675	7.75908	0.004405
3A3_Light	31	40	HSNGNTYLYW			9	1254.55	FL_Alone	16.667	1256.71	0.044176	1.53177	0.051379	7.75992	0.010763
3A3_Light	31	40	HSNGNTYLYW			9	1254.55	FL_S2_Complex	0	1255.18	0.026235	0	0	7.75158	0.006276
3A3_Light	31	40	HSNGNTYLYW			9	1254.55	FL_S2_Complex	0.167	1256.02	0.096151	0.837655	0.099666	7.75457	0.00482
3A3_Light	31	40	HSNGNTYLYW			9	1254.55	FL_S2_Complex	1.667	1256.44	0.009924	1.26107	0.028049	7.75743	0.006656
3A3_Light	31	40	HSNGNTYLYW			9	1254.55	FL_S2_Complex	16.667	1256.57	0.012733	1.38524	0.029162	7.76401	0.002018
3A3_Light	41	51	FLQRPGQSPQL			8	1270.69	FL_Alone	0	1270.35	0.088522	0	0	6.70484	0.003554
3A3_Light	41	51	FLQRPGQSPQL			8	1270.69	FL_Alone	0.167	1271.35	0.127341	1.00414	0.155087	6.70715	0.009515
3A3_Light	41	51	FLQRPGQSPQL			8	1270.69	FL_Alone	1.667	1271.86	0.176831	1.51668	0.197751	6.7001	0.009866
3A3_Light	41	51	FLQRPGQSPQL			8	1270.69	FL_Alone	16.667	1272.39	0.05824	2.04216	0.105963	6.70187	0.00774
3A3_Light	41	51	FLQRPGQSPQL			8	1270.69	FL_S2_Complex	0	1270.31	0.0708	0	0	6.70193	0.006844
3A3_Light	41	51	FLQRPGQSPQL			8	1270.69	FL_S2_Complex	0.167	1271.36	0.046663	1.05159	0.084794	6.71018	0.008962
3A3_Light	41	51	FLQRPGQSPQL			8	1270.69	FL_S2_Complex	1.667	1271.84	0.09835	1.53245	0.121183	6.72735	0.014303
3A3_Light	41	51	FLQRPGQSPQL			8	1270.69	FL_S2_Complex	16.667	1272.37	0.071821	2.06165	0.100851	6.70462	0.006405
3A3_Light	41	52	FLQRPGQSPQLL			9	1383.77	FL_Alone	0	1384.67	0.025183	0	0	6.95944	0.004202
3A3_Light	41	52	FLQRPGQSPQLL			9	1383.77	FL_Alone	0.167	1386.29	0.052758	1.61533	0.05846	6.96605	0.00552
3A3_Light	41	52	FLQRPGQSPQLL			9	1383.77	FL_Alone	1.667	1386.65	0.070542	1.97372	0.074903	6.95921	0.005834
3A3_Light	41	52	FLQRPGQSPQLL			9	1383.77	FL_Alone	16.667	1387.34	0.022305	2.66509	0.033641	6.95911	0.008681
3A3_Light	41	52	FLQRPGQSPQLL			9	1383.77	FL_S2_Complex	0	1384.67	0.025183	0	0	6.95944	0.004202
3A3_Light	41	52	FLQRPGQSPQLL			9	1383.77	FL_S2_Complex	0.167	1386.31	0.079812	1.63654	0.083691	6.956	0.007079
3A3_Light	41	52	FLQRPGQSPQLL			9	1383.77	FL_S2_Complex	1.667	1386.64	0.06084	1.96553	0.065846	6.95971	0.00753
3A3_Light	41	52	FLQRPGQSPQLL			9	1383.77	FL_S2_Complex	16.667	1387.33	0.034422	2.66171	0.042651	6.96316	0.002984
3A3_Light	42	51	LQRPGQSPQL			7	1123.62	FL_Alone	0	1124.26	0.013901	0	0	5.88983	0.006444
3A3_Light	42	51	LQRPGQSPQL			7	1123.62	FL_Alone	0.167	1125.98	0.010711	1.71817	0.017549	5.8884	0.003628
3A3_Light	42	51	LQRPGQSPQL			7	1123.62	FL_Alone	1.667	1126.35	0.03948	2.08637	0.041856	5.88846	0.005283
3A3_Light	42	51	LQRPGQSPQL			7	1123.62	FL_Alone	16.667	1127.02	0.040271	2.76081	0.042602	5.88786	0.007233
3A3_Light	42	51	LQRPGQSPQL			7	1123.62	FL_S2_Complex	0	1124.26	0.013901	0	0	5.88983	0.006444
3A3_Light	42	51	LQRPGQSPQL			7	1123.62	FL_S2_Complex	0.167	1125.97	0.034848	1.71525	0.037518	5.87987	0.005249
3A3_Light	42	51	LQRPGQSPQL			7	1123.62	FL_S2_Complex	1.667	1126.28	0.022672	2.0239	0.026594	5.88678	0.006427
3A3_Light	42	51	LQRPGQSPQL			7	1123.62	FL_S2_Complex	16.667	1126.98	0.031526	2.71661	0.034455	5.88449	0.00301
3A3_Light	52	59	LIYRMSNL			7	1009.55	FL_Alone	0	1010.31	0.01784	0	0	7.02861	0.003308
3A3_Light	52	59	LIYRMSNL			7	1009.55	FL_Alone	0.167	1011.51	0.023182	1.20278	0.029252	7.04078	0.005591
3A3_Light	52	59	LIYRMSNL			7	1009.55	FL_Alone	1.667	1012.76	0.047024	2.4456	0.050294	7.03608	0.00502
3A3_Light	52	59	LIYRMSNL			7	1009.55	FL_Alone	16.667	1013.54	0.085917	3.22466	0.08775	7.03302	0.005451
3A3_Light	52	59	LIYRMSNL			7	1009.55	FL_S2_Complex	0	1010.31	0.01784	0	0	7.02861	0.003308
3A3_Light	52	59	LIYRMSNL			7	1009.55	FL_S2_Complex	0.167	1011.4	0.119325	1.08835	0.120651	7.0277	0.00266
3A3_Light	52	59	LIYRMSNL			7	1009.55	FL_S2_Complex	1.667	1012.38	0.041258	2.06892	0.04495	7.03175	0.009816
3A3_Light	52	59	LIYRMSNL			7	1009.55	FL_S2_Complex	16.667	1013.25	0.04529	2.93945	0.048677	7.03484	0.004286
3A3_Light	53	59	IYRMSNL			6	896.466	FL_Alone	0	897.006	0.018658	0	0	6.67699	0.006425
3A3_Light	53	59	IYRMSNL			6	896.466	FL_Alone	0.167	898.299	0.022273	1.29249	0.029055	6.68278	0.005773
3A3_Light	53	59	IYRMSNL			6	896.466	FL_Alone	1.667	899.529	0.048627	2.52269	0.052083	6.67859	0.003504
3A3_Light	53	59	IYRMSNL			6	896.466	FL_Alone	16.667	900.104	0.042093	3.09757	0.046043	6.67831	0.007396
3A3_Light	53	59	IYRMSNL			6	896.466	FL_S2_Complex	0	897.006	0.018658	0	0	6.67699	0.006425
3A3_Light	53	59	IYRMSNL			6	896.466	FL_S2_Complex	0.167	898.223	0.058635	1.21653	0.061532	6.67516	0.003735
3A3_Light	53	59	IYRMSNL			6	896.466	FL_S2_Complex	1.667	899.208	0.02114	2.20233	0.028196	6.67881	0.006218
3A3_Light	53	59	IYRMSNL			6	896.466	FL_S2_Complex	16.667	899.908	0.039162	2.9021	0.043379	6.68013	0.002464
3A3_Light	54	59	YRMSNL			5	783.382	FL_Alone	0	783.737	0.007153	0	0	7.02819	0.003916
3A3_Light	54	59	YRMSNL			5	783.382	FL_Alone	0.167	784.848	0.027488	1.11084	0.028404	7.04216	0.00623
3A3_Light	54	59	YRMSNL			5	783.382	FL_Alone	1.667	786.034	0.029192	2.29656	0.030056	7.0432	0.003647
3A3_Light	54	59	YRMSNL			5	783.382	FL_Alone	16.667	786.791	0.036939	3.05374	0.037625	7.03588	0.006042
3A3_Light	54	59	YRMSNL			5	783.382	FL_S2_Complex	0	783.737	0.007153	0	0	7.02819	0.003916
3A3_Light	54	59	YRMSNL			5	783.382	FL_S2_Complex	0.167	784.777	0.019337	1.0401	0.020617	7.03458	0.002131
3A3_Light	54	59	YRMSNL			5	783.382	FL_S2_Complex	1.667	785.775	0.032872	2.03805	0.033641	7.03611	0.010853
3A3_Light	54	59	YRMSNL			5	783.382	FL_S2_Complex	16.667	786.603	0.026742	2.86609	0.027682	7.04341	0.007566
3A3_Light	55	72	RMSNLASGVPDRFSGSGS			16	1824.87	FL_Alone	0	1825.82	2.27374e-13	0	0	5.43573	0
3A3_Light	55	72	RMSNLASGVPDRFSGSGS			16	1824.87	FL_Alone	0.167	1832.26	0.058207	6.44383	0.058207	5.50637	0.009661
3A3_Light	55	72	RMSNLASGVPDRFSGSGS			16	1824.87	FL_Alone	1.667	1832.96	0.092107	7.14323	0.092107	5.51706	0.009801
3A3_Light	55	72	RMSNLASGVPDRFSGSGS			16	1824.87	FL_Alone	16.667	1833.49	0.056862	7.67199	0.056862	5.51085	0.013182
3A3_Light	55	72	RMSNLASGVPDRFSGSGS			16	1824.87	FL_S2_Complex	0	1825.82	2.27374e-13	0	0	5.43573	0
3A3_Light	55	72	RMSNLASGVPDRFSGSGS			16	1824.87	FL_S2_Complex	0.167	1832.3	0.070772	6.4832	0.070772	5.50574	0.005751
3A3_Light	55	72	RMSNLASGVPDRFSGSGS			16	1824.87	FL_S2_Complex	1.667	1833	0.088584	7.17749	0.088584	5.51035	0.007162
3A3_Light	55	72	RMSNLASGVPDRFSGSGS			16	1824.87	FL_S2_Complex	16.667	1833.46	0.153237	7.64059	0.153237	5.51817	0.008807
3A3_Light	55	76	RMSNLASGVPDRFSGSGSGTAF			20	2201.04	FL_Alone	0	2204.39	0.097359	0	0	6.84293	0.009862
3A3_Light	55	76	RMSNLASGVPDRFSGSGSGTAF			20	2201.04	FL_Alone	0.167	2207.69	0.036827	3.30382	0.104091	6.85026	0.002259
3A3_Light	55	76	RMSNLASGVPDRFSGSGSGTAF			20	2201.04	FL_Alone	1.667	2209.23	0.028335	4.83932	0.101398	6.84823	0.006558
3A3_Light	55	76	RMSNLASGVPDRFSGSGSGTAF			20	2201.04	FL_Alone	16.667	2209.9	0.214103	5.50775	0.235199	6.84346	0.00826
3A3_Light	55	76	RMSNLASGVPDRFSGSGSGTAF			20	2201.04	FL_S2_Complex	0	2204.35	0.12056	0	0	6.84375	0.009472
3A3_Light	55	76	RMSNLASGVPDRFSGSGSGTAF			20	2201.04	FL_S2_Complex	0.167	2207.74	0.050938	3.39384	0.130879	6.82862	0.006404
3A3_Light	55	76	RMSNLASGVPDRFSGSGSGTAF			20	2201.04	FL_S2_Complex	1.667	2209.19	0.07493	4.83781	0.141948	6.83553	0.009731
3A3_Light	55	76	RMSNLASGVPDRFSGSGSGTAF			20	2201.04	FL_S2_Complex	16.667	2209.77	0.192814	5.42085	0.227402	6.83182	0.012982
3A3_Light	60	75	ASGVPDRFSGSGSGTA			14	1452.67	FL_Alone	0	1454.59	0.18084	0	0	5.78969	0.009497
3A3_Light	60	75	ASGVPDRFSGSGSGTA			14	1452.67	FL_Alone	0.167	1457.7	0.064069	3.10853	0.191854	5.77318	0.00906
3A3_Light	60	75	ASGVPDRFSGSGSGTA			14	1452.67	FL_Alone	1.667	1458.71	0.112849	4.11857	0.213162	5.76962	0.004248
3A3_Light	60	75	ASGVPDRFSGSGSGTA			14	1452.67	FL_Alone	16.667	1459.58	0.160601	4.98609	0.241859	5.76689	0.007154
3A3_Light	60	75	ASGVPDRFSGSGSGTA			14	1452.67	FL_S2_Complex	0	1454.54	0.177974	0	0	5.79189	0.009986
3A3_Light	60	75	ASGVPDRFSGSGSGTA			14	1452.67	FL_S2_Complex	0.167	1457.62	0.123633	3.08	0.216703	5.77201	0.00575
3A3_Light	60	75	ASGVPDRFSGSGSGTA			14	1452.67	FL_S2_Complex	1.667	1458.52	0.095405	3.97868	0.201933	5.77601	0.008957
3A3_Light	60	75	ASGVPDRFSGSGSGTA			14	1452.67	FL_S2_Complex	16.667	1459.37	0.108504	4.83224	0.208442	5.77674	0.004125
3A3_Light	60	77	ASGVPDRFSGSGSGTAFT			16	1700.79	FL_Alone	0	1702.19	0.066357	0	0	6.492	0.006667
3A3_Light	60	77	ASGVPDRFSGSGSGTAFT			16	1700.79	FL_Alone	0.167	1706.02	0.058683	3.82474	0.088583	6.49491	0.002543
3A3_Light	60	77	ASGVPDRFSGSGSGTAFT			16	1700.79	FL_Alone	1.667	1707.07	0.11511	4.8804	0.132866	6.49086	0.003038
3A3_Light	60	77	ASGVPDRFSGSGSGTAFT			16	1700.79	FL_Alone	16.667	1708.13	0.174692	5.93703	0.186871	6.48821	0.010623
3A3_Light	60	77	ASGVPDRFSGSGSGTAFT			16	1700.79	FL_S2_Complex	0	1702.19	0.066357	0	0	6.492	0.006667
3A3_Light	60	77	ASGVPDRFSGSGSGTAFT			16	1700.79	FL_S2_Complex	0.167	1705.92	0.108912	3.73083	0.127534	6.48976	0.001569
3A3_Light	60	77	ASGVPDRFSGSGSGTAFT			16	1700.79	FL_S2_Complex	1.667	1706.92	0.080024	4.72343	0.103957	6.49	0.003787
3A3_Light	60	77	ASGVPDRFSGSGSGTAFT			16	1700.79	FL_S2_Complex	16.667	1707.97	0.079454	5.77444	0.103519	6.49081	0.002705
3A3_Light	60	78	ASGVPDRFSGSGSGTAFTL			17	1813.87	FL_Alone	0	1815.03	0.034202	0	0	7.32627	0.006486
3A3_Light	60	78	ASGVPDRFSGSGSGTAFTL			17	1813.87	FL_Alone	0.167	1818.81	0.068391	3.7721	0.076466	7.332	0.011098
3A3_Light	60	78	ASGVPDRFSGSGSGTAFTL			17	1813.87	FL_Alone	1.667	1819.48	0.123307	4.44679	0.127962	7.32194	0.00203
3A3_Light	60	78	ASGVPDRFSGSGSGTAFTL			17	1813.87	FL_Alone	16.667	1820.24	0.162691	5.20469	0.166247	7.32036	0.005106
3A3_Light	60	78	ASGVPDRFSGSGSGTAFTL			17	1813.87	FL_S2_Complex	0	1815.03	0.034202	0	0	7.32627	0.006486
3A3_Light	60	78	ASGVPDRFSGSGSGTAFTL			17	1813.87	FL_S2_Complex	0.167	1818.78	0.094194	3.74178	0.100211	7.33889	0.003284
3A3_Light	60	78	ASGVPDRFSGSGSGTAFTL			17	1813.87	FL_S2_Complex	1.667	1819.41	0.123475	4.37626	0.128124	7.32571	0.009134
3A3_Light	60	78	ASGVPDRFSGSGSGTAFTL			17	1813.87	FL_S2_Complex	16.667	1820.38	0.276651	5.34506	0.278757	7.32589	0.006528
3A3_Light	76	85	FTLRISRVEA			9	1191.68	FL_Alone	0	1192.37	0.008247	0	0	6.57619	0.007517
3A3_Light	76	85	FTLRISRVEA			9	1191.68	FL_Alone	0.167	1193.14	0.006386	0.775095	0.01043	6.582	0.006031
3A3_Light	76	85	FTLRISRVEA			9	1191.68	FL_Alone	1.667	1193.54	0.037124	1.17228	0.038029	6.58059	0.001685
3A3_Light	76	85	FTLRISRVEA			9	1191.68	FL_Alone	16.667	1194.3	0.051652	1.92672	0.052306	6.57555	0.006267
3A3_Light	76	85	FTLRISRVEA			9	1191.68	FL_S2_Complex	0	1192.37	0.008247	0	0	6.57619	0.007517
3A3_Light	76	85	FTLRISRVEA			9	1191.68	FL_S2_Complex	0.167	1193.13	0.035246	0.761868	0.036198	6.57797	0.002866
3A3_Light	76	85	FTLRISRVEA			9	1191.68	FL_S2_Complex	1.667	1193.55	0.06542	1.18333	0.065938	6.5778	0.003851
3A3_Light	76	85	FTLRISRVEA			9	1191.68	FL_S2_Complex	16.667	1194.29	0.033989	1.92111	0.034975	6.57942	0.002859
3A3_Light	76	87	FTLRISRVEAED			11	1435.75	FL_Alone	0	1436.7	0.038012	0	0	6.53436	0.004028
3A3_Light	76	87	FTLRISRVEAED			11	1435.75	FL_Alone	0.167	1437.55	0.022323	0.848114	0.044082	6.53618	0.003049
3A3_Light	76	87	FTLRISRVEAED			11	1435.75	FL_Alone	1.667	1437.76	0.021693	1.06119	0.043766	6.53962	0.006522
3A3_Light	76	87	FTLRISRVEAED			11	1435.75	FL_Alone	16.667	1438.55	0.051632	1.85173	0.064115	6.53349	0.005724
3A3_Light	76	87	FTLRISRVEAED			11	1435.75	FL_S2_Complex	0	1436.7	0.038012	0	0	6.53436	0.004028
3A3_Light	76	87	FTLRISRVEAED			11	1435.75	FL_S2_Complex	0.167	1437.53	0.047909	0.832207	0.061157	6.52726	0.005084
3A3_Light	76	87	FTLRISRVEAED			11	1435.75	FL_S2_Complex	1.667	1437.79	0.049636	1.08388	0.062519	6.53644	0.009155
3A3_Light	76	87	FTLRISRVEAED			11	1435.75	FL_S2_Complex	16.667	1438.59	0.051813	1.88652	0.064261	6.53423	0.009091
3A3_Light	76	90	FTLRISRVEAEDVGV			14	1690.91	FL_Alone	0	1692	0.043411	0	0	6.96882	0.002883
3A3_Light	76	90	FTLRISRVEAEDVGV			14	1690.91	FL_Alone	0.167	1693.22	0.051914	1.22757	0.067673	6.96929	0.00278
3A3_Light	76	90	FTLRISRVEAEDVGV			14	1690.91	FL_Alone	1.667	1693.65	0.011361	1.65229	0.044873	6.96665	0.00335
3A3_Light	76	90	FTLRISRVEAEDVGV			14	1690.91	FL_Alone	16.667	1694.35	0.075884	2.35768	0.087424	6.96491	0.005717
3A3_Light	76	90	FTLRISRVEAEDVGV			14	1690.91	FL_S2_Complex	0	1692	0.043411	0	0	6.96882	0.002883
3A3_Light	76	90	FTLRISRVEAEDVGV			14	1690.91	FL_S2_Complex	0.167	1693.23	0.045806	1.23232	0.063109	6.96412	0.004088
3A3_Light	76	90	FTLRISRVEAEDVGV			14	1690.91	FL_S2_Complex	1.667	1693.7	0.046063	1.70576	0.063296	6.96439	0.008119
3A3_Light	76	90	FTLRISRVEAEDVGV			14	1690.91	FL_S2_Complex	16.667	1694.4	0.035733	2.40328	0.056226	6.96767	0.003558
3A3_Light	77	83	TLRISRV			6	844.536	FL_Alone	0	844.916	0.018112	0	0	5.6496	0.004489
3A3_Light	77	83	TLRISRV			6	844.536	FL_Alone	0.167	845.109	0.013692	0.192726	0.022705	5.65367	0.003786
3A3_Light	77	83	TLRISRV			6	844.536	FL_Alone	1.667	845.536	0.038539	0.620059	0.042583	5.65723	0.003694
3A3_Light	77	83	TLRISRV			6	844.536	FL_Alone	16.667	846.183	0.024533	1.26719	0.030494	5.65145	0.005304
3A3_Light	77	83	TLRISRV			6	844.536	FL_S2_Complex	0	844.916	0.018112	0	0	5.6496	0.004489
3A3_Light	77	83	TLRISRV			6	844.536	FL_S2_Complex	0.167	845.095	0.033769	0.179339	0.03832	5.65073	0.004293
3A3_Light	77	83	TLRISRV			6	844.536	FL_S2_Complex	1.667	845.472	0.017235	0.555922	0.025002	5.65428	0.01138
3A3_Light	77	83	TLRISRV			6	844.536	FL_S2_Complex	16.667	846.158	0.031499	1.24203	0.036335	5.65379	0.005168
3A3_Light	77	85	TLRISRVEA			8	1044.62	FL_Alone	0	1045.15	0.009057	0	0	5.69329	0.005286
3A3_Light	77	85	TLRISRVEA			8	1044.62	FL_Alone	0.167	1045.97	0.009804	0.818863	0.013347	5.69408	0.002728
3A3_Light	77	85	TLRISRVEA			8	1044.62	FL_Alone	1.667	1046.38	0.048188	1.23168	0.049032	5.6997	0.004217
3A3_Light	77	85	TLRISRVEA			8	1044.62	FL_Alone	16.667	1047.06	0.053762	1.9026	0.05452	5.69784	0.007597
3A3_Light	77	85	TLRISRVEA			8	1044.62	FL_S2_Complex	0	1045.15	0.009057	0	0	5.69329	0.005286
3A3_Light	77	85	TLRISRVEA			8	1044.62	FL_S2_Complex	0.167	1045.94	0.035469	0.790476	0.036607	5.69357	0.002954
3A3_Light	77	85	TLRISRVEA			8	1044.62	FL_S2_Complex	1.667	1046.35	0.018879	1.19552	0.020939	5.69649	0.005474
3A3_Light	77	85	TLRISRVEA			8	1044.62	FL_S2_Complex	16.667	1047.02	0.026555	1.87207	0.028057	5.69782	0.004207
3A3_Light	77	87	TLRISRVEAED			10	1288.69	FL_Alone	0	1289.3	0.005822	0	0	5.6697	0.004008
3A3_Light	77	87	TLRISRVEAED			10	1288.69	FL_Alone	0.167	1290.69	0.025201	1.39573	0.025865	5.6709	0.00215
3A3_Light	77	87	TLRISRVEAED			10	1288.69	FL_Alone	1.667	1291.18	0.033401	1.87792	0.033905	5.67294	0.003463
3A3_Light	77	87	TLRISRVEAED			10	1288.69	FL_Alone	16.667	1291.85	0.043742	2.5571	0.044128	5.6688	0.004677
3A3_Light	77	87	TLRISRVEAED			10	1288.69	FL_S2_Complex	0	1289.3	0.005822	0	0	5.6697	0.004008
3A3_Light	77	87	TLRISRVEAED			10	1288.69	FL_S2_Complex	0.167	1290.62	0.055642	1.31984	0.055945	5.66978	0.004393
3A3_Light	77	87	TLRISRVEAED			10	1288.69	FL_S2_Complex	1.667	1291.12	0.041576	1.81923	0.041982	5.67396	0.008556
3A3_Light	77	87	TLRISRVEAED			10	1288.69	FL_S2_Complex	16.667	1291.79	0.024134	2.48809	0.024826	5.67251	0.003582
3A3_Light	77	90	TLRISRVEAEDVGV			13	1543.84	FL_Alone	0	1545.08	0.020814	0	0	6.36596	0.005407
3A3_Light	77	90	TLRISRVEAEDVGV			13	1543.84	FL_Alone	0.167	1546.25	0.040296	1.16606	0.045354	6.3751	0.008668
3A3_Light	77	90	TLRISRVEAEDVGV			13	1543.84	FL_Alone	1.667	1546.72	0.031982	1.64058	0.038158	6.36869	0.004301
3A3_Light	77	90	TLRISRVEAEDVGV			13	1543.84	FL_Alone	16.667	1547.38	0.073029	2.30134	0.075938	6.36343	0.006551
3A3_Light	77	90	TLRISRVEAEDVGV			13	1543.84	FL_S2_Complex	0	1545.08	0.020814	0	0	6.36596	0.005407
3A3_Light	77	90	TLRISRVEAEDVGV			13	1543.84	FL_S2_Complex	0.167	1546.15	0.103214	1.07098	0.105292	6.36322	0.006061
3A3_Light	77	90	TLRISRVEAEDVGV			13	1543.84	FL_S2_Complex	1.667	1546.63	0.042292	1.54601	0.047136	6.36647	0.00902
3A3_Light	77	90	TLRISRVEAEDVGV			13	1543.84	FL_S2_Complex	16.667	1547.29	0.031659	2.20639	0.037888	6.36755	0.003655
3A3_Light	78	90	LRISRVEAEDVGV			12	1442.8	FL_Alone	0	1443.83	0.020592	0	0	6.276	0.007909
3A3_Light	78	90	LRISRVEAEDVGV			12	1442.8	FL_Alone	0.167	1445.05	0.044324	1.22025	0.048874	6.2839	0.009693
3A3_Light	78	90	LRISRVEAEDVGV			12	1442.8	FL_Alone	1.667	1445.53	0.057576	1.69912	0.061147	6.27951	0.001714
3A3_Light	78	90	LRISRVEAEDVGV			12	1442.8	FL_Alone	16.667	1446.2	0.085115	2.36695	0.08757	6.27226	0.00643
3A3_Light	78	90	LRISRVEAEDVGV			12	1442.8	FL_S2_Complex	0	1443.83	0.020592	0	0	6.276	0.007909
3A3_Light	78	90	LRISRVEAEDVGV			12	1442.8	FL_S2_Complex	0.167	1445.05	0.082694	1.21494	0.085219	6.27959	0.005211
3A3_Light	78	90	LRISRVEAEDVGV			12	1442.8	FL_S2_Complex	1.667	1445.53	0.062222	1.69925	0.065541	6.28048	0.011118
3A3_Light	78	90	LRISRVEAEDVGV			12	1442.8	FL_S2_Complex	16.667	1446.19	0.078224	2.35598	0.080889	6.28453	0.006273
3A3_Light	79	87	RISRVEAED			8	1074.55	FL_Alone	0	1075.18	0.035927	0	0	4.77432	0.007154
3A3_Light	79	87	RISRVEAED			8	1074.55	FL_Alone	0.167	1076.31	0.013235	1.12641	0.038287	4.771	0.00317
3A3_Light	79	87	RISRVEAED			8	1074.55	FL_Alone	1.667	1076.7	0.04675	1.5174	0.05896	4.77703	0.004461
3A3_Light	79	87	RISRVEAED			8	1074.55	FL_Alone	16.667	1077.23	0.048676	2.04455	0.060498	4.77377	0.008206
3A3_Light	79	87	RISRVEAED			8	1074.55	FL_S2_Complex	0	1075.18	0.035927	0	0	4.77432	0.007154
3A3_Light	79	87	RISRVEAED			8	1074.55	FL_S2_Complex	0.167	1076.33	0.018953	1.14949	0.04062	4.77109	0.005021
3A3_Light	79	87	RISRVEAED			8	1074.55	FL_S2_Complex	1.667	1076.72	0.054368	1.53739	0.065166	4.77785	0.008926
3A3_Light	79	87	RISRVEAED			8	1074.55	FL_S2_Complex	16.667	1077.23	0.043927	2.04933	0.056748	4.77431	0.007092
3A3_Light	84	90	EAEDVGV			6	718.325	FL_Alone	0	718.709	0.019561	0	0	6.00866	0.007923
3A3_Light	84	90	EAEDVGV			6	718.325	FL_Alone	0.167	719.158	0.013919	0.449048	0.024007	6.00751	0.007057
3A3_Light	84	90	EAEDVGV			6	718.325	FL_Alone	1.667	719.201	0.010226	0.49127	0.022072	6.01723	0.005714
3A3_Light	84	90	EAEDVGV			6	718.325	FL_Alone	16.667	719.238	0.0316	0.528199	0.037165	6.01411	0.00828
3A3_Light	84	90	EAEDVGV			6	718.325	FL_S2_Complex	0	718.709	0.019561	0	0	6.00866	0.007923
3A3_Light	84	90	EAEDVGV			6	718.325	FL_S2_Complex	0.167	719.106	0.016319	0.396425	0.025474	6.00993	0.002807
3A3_Light	84	90	EAEDVGV			6	718.325	FL_S2_Complex	1.667	719.186	0.004819	0.476907	0.020145	6.01045	0.006612
3A3_Light	84	90	EAEDVGV			6	718.325	FL_S2_Complex	16.667	719.217	0.012522	0.507489	0.023225	6.01418	0.005683
3A3_Light	95	109	QYLEYPLTFGAGTKL			13	1700.89	FL_Alone	0	1701.86	0.03892	0	0	7.85392	0.002371
3A3_Light	95	109	QYLEYPLTFGAGTKL			13	1700.89	FL_Alone	0.167	1703.47	0.009781	1.61373	0.04013	7.86611	0.00594
3A3_Light	95	109	QYLEYPLTFGAGTKL			13	1700.89	FL_Alone	1.667	1703.83	0.028694	1.96599	0.048354	7.85833	0.006301
3A3_Light	95	109	QYLEYPLTFGAGTKL			13	1700.89	FL_Alone	16.667	1704.47	0.093037	2.61423	0.100849	7.8547	0.01125
3A3_Light	95	109	QYLEYPLTFGAGTKL			13	1700.89	FL_S2_Complex	0	1701.86	0.03892	0	0	7.85392	0.002371
3A3_Light	95	109	QYLEYPLTFGAGTKL			13	1700.89	FL_S2_Complex	0.167	1703.45	0.150076	1.58828	0.15504	7.86052	0.005867
3A3_Light	95	109	QYLEYPLTFGAGTKL			13	1700.89	FL_S2_Complex	1.667	1703.95	0.065312	2.08605	0.07603	7.86038	0.0061
3A3_Light	95	109	QYLEYPLTFGAGTKL			13	1700.89	FL_S2_Complex	16.667	1704.46	0.076925	2.59573	0.086211	7.86333	0.001469
3A3_Light	95	111	QYLEYPLTFGAGTKLEL			15	1943.02	FL_Alone	0	1944.15	0.055706	0	0	8.19907	0.008714
3A3_Light	95	111	QYLEYPLTFGAGTKLEL			15	1943.02	FL_Alone	0.167	1945.75	0.079976	1.59208	0.097464	8.21445	0.004945
3A3_Light	95	111	QYLEYPLTFGAGTKLEL			15	1943.02	FL_Alone	1.667	1946.13	0.048947	1.97386	0.074155	8.20361	0.006352
3A3_Light	95	111	QYLEYPLTFGAGTKLEL			15	1943.02	FL_Alone	16.667	1946.66	0.118333	2.50499	0.13079	8.20285	0.013444
3A3_Light	95	111	QYLEYPLTFGAGTKLEL			15	1943.02	FL_S2_Complex	0	1944.15	0.055706	0	0	8.19907	0.008714
3A3_Light	95	111	QYLEYPLTFGAGTKLEL			15	1943.02	FL_S2_Complex	0.167	1945.74	0.080573	1.58759	0.097955	8.20862	0.001562
3A3_Light	95	111	QYLEYPLTFGAGTKLEL			15	1943.02	FL_S2_Complex	1.667	1946.08	0.047463	1.92552	0.073184	8.21087	0.009524
3A3_Light	95	111	QYLEYPLTFGAGTKLEL			15	1943.02	FL_S2_Complex	16.667	1946.67	0.060475	2.51726	0.082222	8.20733	0.003366
3A3_Light	96	109	YLEYPLTFGAGTKL			12	1572.83	FL_Alone	0	1573.76	0.038175	0	0	7.86604	0.002266
3A3_Light	96	109	YLEYPLTFGAGTKL			12	1572.83	FL_Alone	0.167	1575.34	0.067399	1.58256	0.077459	7.87214	0.003005
3A3_Light	96	109	YLEYPLTFGAGTKL			12	1572.83	FL_Alone	1.667	1575.74	0.05004	1.98696	0.062939	7.86922	0.009214
3A3_Light	96	109	YLEYPLTFGAGTKL			12	1572.83	FL_Alone	16.667	1576.28	0.176285	2.5198	0.180371	7.86395	0.007161
3A3_Light	96	109	YLEYPLTFGAGTKL			12	1572.83	FL_S2_Complex	0	1573.76	0.038175	0	0	7.86604	0.002266
3A3_Light	96	109	YLEYPLTFGAGTKL			12	1572.83	FL_S2_Complex	0.167	1575.25	0.060263	1.49377	0.071337	7.87102	0.004089
3A3_Light	96	109	YLEYPLTFGAGTKL			12	1572.83	FL_S2_Complex	1.667	1575.67	0.027605	1.91548	0.04711	7.87191	0.005546
3A3_Light	96	109	YLEYPLTFGAGTKL			12	1572.83	FL_S2_Complex	16.667	1576.21	0.121142	2.45796	0.127014	7.87333	0.005128
3A3_Light	96	111	YLEYPLTFGAGTKLEL			14	1814.96	FL_Alone	0	1816.09	0.062818	0	0	8.22696	0.00529
3A3_Light	96	111	YLEYPLTFGAGTKLEL			14	1814.96	FL_Alone	0.167	1817.52	0.075336	1.42909	0.09809	8.23931	0.008095
3A3_Light	96	111	YLEYPLTFGAGTKLEL			14	1814.96	FL_Alone	1.667	1817.78	0.052191	1.68966	0.081671	8.22974	0.008291
3A3_Light	96	111	YLEYPLTFGAGTKLEL			14	1814.96	FL_Alone	16.667	1818.34	0.15918	2.25297	0.171127	8.23007	0.006895
3A3_Light	96	111	YLEYPLTFGAGTKLEL			14	1814.96	FL_S2_Complex	0	1816.09	0.062818	0	0	8.22696	0.00529
3A3_Light	96	111	YLEYPLTFGAGTKLEL			14	1814.96	FL_S2_Complex	0.167	1817.44	0.037984	1.3549	0.073409	8.23969	0.005049
3A3_Light	96	111	YLEYPLTFGAGTKLEL			14	1814.96	FL_S2_Complex	1.667	1817.81	0.030359	1.72786	0.06977	8.24001	0.009341
3A3_Light	96	111	YLEYPLTFGAGTKLEL			14	1814.96	FL_S2_Complex	16.667	1818.34	0.124085	2.25562	0.13908	8.23739	0.010776
3A3_Light	97	103	LEYPLTF			5	882.461	FL_Alone	0	882.887	0.012587	0	0	8.40557	0.002322
3A3_Light	97	103	LEYPLTF			5	882.461	FL_Alone	0.167	883.423	0.070859	0.535997	0.071969	8.41691	0.005229
3A3_Light	97	103	LEYPLTF			5	882.461	FL_Alone	1.667	883.647	0.040223	0.759802	0.042146	8.40878	0.005931
3A3_Light	97	103	LEYPLTF			5	882.461	FL_Alone	16.667	884.039	0.015724	1.15176	0.020141	8.40212	0.009324
3A3_Light	97	103	LEYPLTF			5	882.461	FL_S2_Complex	0	882.887	0.012587	0	0	8.40557	0.002322
3A3_Light	97	103	LEYPLTF			5	882.461	FL_S2_Complex	0.167	883.404	0.034132	0.51705	0.036379	8.41258	0.003192
3A3_Light	97	103	LEYPLTF			5	882.461	FL_S2_Complex	1.667	883.582	0.054218	0.69507	0.05566	8.41708	0.009487
3A3_Light	97	103	LEYPLTF			5	882.461	FL_S2_Complex	16.667	884.013	0.054006	1.12552	0.055454	8.41007	0.004245
3A3_Light	97	106	LEYPLTFGAG			8	1067.54	FL_Alone	0	1068.09	0.010758	0	0	7.97702	0.002305
3A3_Light	97	106	LEYPLTFGAG			8	1067.54	FL_Alone	0.167	1069.17	0.014597	1.07952	0.018133	7.98688	0.004984
3A3_Light	97	106	LEYPLTFGAG			8	1067.54	FL_Alone	1.667	1069.44	0.023084	1.34467	0.025468	7.98246	0.004838
3A3_Light	97	106	LEYPLTFGAG			8	1067.54	FL_Alone	16.667	1069.86	0.027235	1.76426	0.029282	7.97682	0.007371
3A3_Light	97	106	LEYPLTFGAG			8	1067.54	FL_S2_Complex	0	1068.09	0.010758	0	0	7.97702	0.002305
3A3_Light	97	106	LEYPLTFGAG			8	1067.54	FL_S2_Complex	0.167	1069.1	0.02451	1.00745	0.026767	7.98131	0.003171
3A3_Light	97	106	LEYPLTFGAG			8	1067.54	FL_S2_Complex	1.667	1069.31	0.04462	1.21465	0.045898	7.98682	0.002592
3A3_Light	97	106	LEYPLTFGAG			8	1067.54	FL_S2_Complex	16.667	1069.8	0.038281	1.70314	0.039764	7.98026	0.005469
3A3_Light	99	109	YPLTFGAGTKL			9	1167.64	FL_Alone	0	1168.3	0.030619	0	0	7.66992	0.004285
3A3_Light	99	109	YPLTFGAGTKL			9	1167.64	FL_Alone	0.167	1169.77	0.073952	1.4679	0.08004	7.68155	0.008707
3A3_Light	99	109	YPLTFGAGTKL			9	1167.64	FL_Alone	1.667	1170.13	0.078388	1.82604	0.084156	7.67179	0.004958
3A3_Light	99	109	YPLTFGAGTKL			9	1167.64	FL_Alone	16.667	1170.56	0.05337	2.26106	0.061529	7.66597	0.011689
3A3_Light	99	109	YPLTFGAGTKL			9	1167.64	FL_S2_Complex	0	1168.3	0.030619	0	0	7.66992	0.004285
3A3_Light	99	109	YPLTFGAGTKL			9	1167.64	FL_S2_Complex	0.167	1169.68	0.045161	1.38327	0.054562	7.67087	0.002509
3A3_Light	99	109	YPLTFGAGTKL			9	1167.64	FL_S2_Complex	1.667	1169.98	0.064336	1.68158	0.071251	7.67141	0.006977
3A3_Light	99	109	YPLTFGAGTKL			9	1167.64	FL_S2_Complex	16.667	1170.52	0.059129	2.21753	0.066587	7.67113	0.00529
3A3_Light	110	121	ELKRTVAAPSVF			10	1317.75	FL_Alone	0	1318.81	0.0665	0	0	6.41571	0.004551
3A3_Light	110	121	ELKRTVAAPSVF			10	1317.75	FL_Alone	0.167	1321.3	0.01755	2.48651	0.068776	6.42322	0.010939
3A3_Light	110	121	ELKRTVAAPSVF			10	1317.75	FL_Alone	1.667	1321.56	0.083203	2.75005	0.106512	6.42499	0.007195
3A3_Light	110	121	ELKRTVAAPSVF			10	1317.75	FL_Alone	16.667	1321.98	0.092996	3.17313	0.114326	6.42361	0.002124
3A3_Light	110	121	ELKRTVAAPSVF			10	1317.75	FL_S2_Complex	0	1318.81	0.0665	0	0	6.41571	0.004551
3A3_Light	110	121	ELKRTVAAPSVF			10	1317.75	FL_S2_Complex	0.167	1321.27	0.082107	2.46091	0.105658	6.4172	0.003984
3A3_Light	110	121	ELKRTVAAPSVF			10	1317.75	FL_S2_Complex	1.667	1321.52	0.038874	2.70807	0.077028	6.41735	0.007112
3A3_Light	110	121	ELKRTVAAPSVF			10	1317.75	FL_S2_Complex	16.667	1321.98	0.035381	3.16645	0.075326	6.41838	0.005337
3A3_Light	112	120	KRTVAAPSV			7	928.557	FL_Alone	0	929.33	0.056522	0	0	5.06518	0.006456
3A3_Light	112	120	KRTVAAPSV			7	928.557	FL_Alone	0.167	931.563	0.025978	2.23227	0.062206	5.05942	0.002998
3A3_Light	112	120	KRTVAAPSV			7	928.557	FL_Alone	1.667	931.819	0.073547	2.48828	0.092757	5.06639	0.003884
3A3_Light	112	120	KRTVAAPSV			7	928.557	FL_Alone	16.667	932.108	0.072511	2.77729	0.091938	5.06529	0.003371
3A3_Light	112	120	KRTVAAPSV			7	928.557	FL_S2_Complex	0	929.321	0.049092	0	0	5.06517	0.006471
3A3_Light	112	120	KRTVAAPSV			7	928.557	FL_S2_Complex	0.167	931.513	0.054423	2.19157	0.073293	5.06061	0.003325
3A3_Light	112	120	KRTVAAPSV			7	928.557	FL_S2_Complex	1.667	931.777	0.03176	2.45564	0.05847	5.06689	0.008947
3A3_Light	112	120	KRTVAAPSV			7	928.557	FL_S2_Complex	16.667	932.106	0.056003	2.78418	0.074474	5.06527	0.00511
3A3_Light	112	121	KRTVAAPSVF			8	1075.63	FL_Alone	0	1076.32	0.029296	0	0	6.17761	0.007693
3A3_Light	112	121	KRTVAAPSVF			8	1075.63	FL_Alone	0.167	1078.74	0.020439	2.4242	0.035721	6.18299	0.007373
3A3_Light	112	121	KRTVAAPSVF			8	1075.63	FL_Alone	1.667	1078.98	0.058618	2.66273	0.065531	6.17983	0.003372
3A3_Light	112	121	KRTVAAPSVF			8	1075.63	FL_Alone	16.667	1079.27	0.066456	2.94948	0.072627	6.17615	0.006385
3A3_Light	112	121	KRTVAAPSVF			8	1075.63	FL_S2_Complex	0	1076.32	0.029296	0	0	6.17761	0.007693
3A3_Light	112	121	KRTVAAPSVF			8	1075.63	FL_S2_Complex	0.167	1078.69	0.057223	2.37203	0.064287	6.17167	0.007084
3A3_Light	112	121	KRTVAAPSVF			8	1075.63	FL_S2_Complex	1.667	1078.94	0.037564	2.6219	0.047637	6.17608	0.008344
3A3_Light	112	121	KRTVAAPSVF			8	1075.63	FL_S2_Complex	16.667	1079.27	0.019296	2.94636	0.03508	6.17446	0.005805
3A3_Light	121	127	FIFPPSD			4	822.403	FL_Alone	0	822.959	0.0342	0	0	7.44843	0.00248
3A3_Light	121	127	FIFPPSD			4	822.403	FL_Alone	0.167	823.342	0.010108	0.382042	0.035662	7.46	0.006942
3A3_Light	121	127	FIFPPSD			4	822.403	FL_Alone	1.667	823.665	0.030051	0.705828	0.045527	7.45481	0.002833
3A3_Light	121	127	FIFPPSD			4	822.403	FL_Alone	16.667	823.768	0.023084	0.809011	0.041261	7.4485	0.006422
3A3_Light	121	127	FIFPPSD			4	822.403	FL_S2_Complex	0	822.959	0.0342	0	0	7.44843	0.00248
3A3_Light	121	127	FIFPPSD			4	822.403	FL_S2_Complex	0.167	823.309	0.022895	0.349083	0.041156	7.45033	0.003066
3A3_Light	121	127	FIFPPSD			4	822.403	FL_S2_Complex	1.667	823.624	0.025037	0.664317	0.042385	7.45395	0.005552
3A3_Light	121	127	FIFPPSD			4	822.403	FL_S2_Complex	16.667	823.747	0.032826	0.787593	0.047404	7.44976	0.005034
3A3_Light	121	128	FIFPPSDE			5	951.446	FL_Alone	0	952.004	0.01375	0	0	7.48386	0.002591
3A3_Light	121	128	FIFPPSDE			5	951.446	FL_Alone	0.167	952.669	0.012938	0.66516	0.01888	7.49406	0.004744
3A3_Light	121	128	FIFPPSDE			5	951.446	FL_Alone	1.667	952.975	0.032113	0.970602	0.034933	7.48871	0.003258
3A3_Light	121	128	FIFPPSDE			5	951.446	FL_Alone	16.667	953.117	0.046376	1.11314	0.048371	7.48383	0.010592
3A3_Light	121	128	FIFPPSDE			5	951.446	FL_S2_Complex	0	952.004	0.01375	0	0	7.48386	0.002591
3A3_Light	121	128	FIFPPSDE			5	951.446	FL_S2_Complex	0.167	952.611	0.040147	0.606951	0.042437	7.48368	0.002457
3A3_Light	121	128	FIFPPSDE			5	951.446	FL_S2_Complex	1.667	952.925	0.036923	0.920952	0.0394	7.4862	0.004497
3A3_Light	121	128	FIFPPSDE			5	951.446	FL_S2_Complex	16.667	953.074	0.012727	1.07025	0.018736	7.48402	0.001388
3A3_Light	121	130	FIFPPSDEQL			7	1192.59	FL_Alone	0	1193.32	0.009823	0	0	7.95283	0.002357
3A3_Light	121	130	FIFPPSDEQL			7	1192.59	FL_Alone	0.167	1194.17	0.015559	0.852564	0.018401	7.9651	0.004729
3A3_Light	121	130	FIFPPSDEQL			7	1192.59	FL_Alone	1.667	1194.93	0.054524	1.61248	0.055402	7.95538	0.005785
3A3_Light	121	130	FIFPPSDEQL			7	1192.59	FL_Alone	16.667	1195.72	0.074453	2.4016	0.075099	7.95336	0.009995
3A3_Light	121	130	FIFPPSDEQL			7	1192.59	FL_S2_Complex	0	1193.32	0.009823	0	0	7.95283	0.002357
3A3_Light	121	130	FIFPPSDEQL			7	1192.59	FL_S2_Complex	0.167	1194.08	0.06329	0.759281	0.064048	7.95774	0.005119
3A3_Light	121	130	FIFPPSDEQL			7	1192.59	FL_S2_Complex	1.667	1194.91	0.041992	1.58973	0.043125	7.96016	0.004253
3A3_Light	121	130	FIFPPSDEQL			7	1192.59	FL_S2_Complex	16.667	1195.69	0.051122	2.36334	0.052057	7.9583	0.003277
3A3_Light	122	127	IFPPSD			3	675.335	FL_Alone	0	675.75	0.019736	0	0	6.08119	0.003185
3A3_Light	122	127	IFPPSD			3	675.335	FL_Alone	0.167	676.207	0.011432	0.456565	0.022808	6.08018	0.002109
3A3_Light	122	127	IFPPSD			3	675.335	FL_Alone	1.667	676.51	0.023477	0.75935	0.03067	6.08397	0.002801
3A3_Light	122	127	IFPPSD			3	675.335	FL_Alone	16.667	676.65	0.020258	0.899566	0.028283	6.08147	0.003725
3A3_Light	122	127	IFPPSD			3	675.335	FL_S2_Complex	0	675.75	0.019736	0	0	6.08119	0.003185
3A3_Light	122	127	IFPPSD			3	675.335	FL_S2_Complex	0.167	676.197	0.02336	0.446619	0.030581	6.0798	0.002556
3A3_Light	122	127	IFPPSD			3	675.335	FL_S2_Complex	1.667	676.505	0.027869	0.754526	0.03415	6.08259	0.003509
3A3_Light	122	127	IFPPSD			3	675.335	FL_S2_Complex	16.667	676.626	0.000912	0.875038	0.019757	6.0802	0.001303
3A3_Light	122	128	IFPPSDE			4	804.377	FL_Alone	0	804.912	0.028138	0	0	6.2023	0.00456
3A3_Light	122	128	IFPPSDE			4	804.377	FL_Alone	0.167	805.578	0.025364	0.665817	0.037883	6.20334	0.003127
3A3_Light	122	128	IFPPSDE			4	804.377	FL_Alone	1.667	805.921	0.030515	1.00855	0.041508	6.20931	0.003165
3A3_Light	122	128	IFPPSDE			4	804.377	FL_Alone	16.667	806.049	0.026605	1.13739	0.038724	6.20328	0.006679
3A3_Light	122	128	IFPPSDE			4	804.377	FL_S2_Complex	0	804.912	0.028138	0	0	6.2023	0.00456
3A3_Light	122	128	IFPPSDE			4	804.377	FL_S2_Complex	0.167	805.521	0.037271	0.608867	0.0467	6.19967	0.003536
3A3_Light	122	128	IFPPSDE			4	804.377	FL_S2_Complex	1.667	805.875	0.011936	0.962777	0.030565	6.19907	0.004393
3A3_Light	122	128	IFPPSDE			4	804.377	FL_S2_Complex	16.667	806.014	0.030947	1.10247	0.041827	6.20012	0.002235
3A3_Light	122	136	IFPPSDEQLKSGTAS			12	1576.79	FL_Alone	0	1577.68	0.017291	0	0	6.01293	0.009649
3A3_Light	122	136	IFPPSDEQLKSGTAS			12	1576.79	FL_Alone	0.167	1580.35	0.037345	2.67498	0.041154	6.01683	0.005045
3A3_Light	122	136	IFPPSDEQLKSGTAS			12	1576.79	FL_Alone	1.667	1581.68	0.156239	3.99674	0.157192	6.01749	0.006555
3A3_Light	122	136	IFPPSDEQLKSGTAS			12	1576.79	FL_Alone	16.667	1582.68	0.133553	5.00556	0.134667	6.01034	0.009893
3A3_Light	122	136	IFPPSDEQLKSGTAS			12	1576.79	FL_S2_Complex	0	1577.68	0.017291	0	0	6.01293	0.009649
3A3_Light	122	136	IFPPSDEQLKSGTAS			12	1576.79	FL_S2_Complex	0.167	1580.32	0.086961	2.63957	0.088664	6.01527	0.004459
3A3_Light	122	136	IFPPSDEQLKSGTAS			12	1576.79	FL_S2_Complex	1.667	1581.68	0.088816	3.99679	0.090483	6.01173	0.005712
3A3_Light	122	136	IFPPSDEQLKSGTAS			12	1576.79	FL_S2_Complex	16.667	1582.61	0.085243	4.92763	0.086979	6.0154	0.006248
3A3_Light	122	137	IFPPSDEQLKSGTASV			13	1675.85	FL_Alone	0	1676.97	0.015003	0	0	6.39162	0.008428
3A3_Light	122	137	IFPPSDEQLKSGTASV			13	1675.85	FL_Alone	0.167	1679.6	0.051683	2.62608	0.053816	6.3948	0.004837
3A3_Light	122	137	IFPPSDEQLKSGTASV			13	1675.85	FL_Alone	1.667	1680.9	0.156251	3.92901	0.15697	6.38802	0.002024
3A3_Light	122	137	IFPPSDEQLKSGTASV			13	1675.85	FL_Alone	16.667	1681.85	0.188594	4.87752	0.18919	6.38433	0.008781
3A3_Light	122	137	IFPPSDEQLKSGTASV			13	1675.85	FL_S2_Complex	0	1676.97	0.015003	0	0	6.39162	0.008428
3A3_Light	122	137	IFPPSDEQLKSGTASV			13	1675.85	FL_S2_Complex	0.167	1679.52	0.11805	2.54804	0.119	6.38671	0.003342
3A3_Light	122	137	IFPPSDEQLKSGTASV			13	1675.85	FL_S2_Complex	1.667	1680.84	0.094104	3.87256	0.095292	6.38736	0.006611
3A3_Light	122	137	IFPPSDEQLKSGTASV			13	1675.85	FL_S2_Complex	16.667	1681.81	0.104034	4.84587	0.105111	6.3866	0.002117
3A3_Light	128	137	EQLKSGTASV			9	1019.54	FL_Alone	0	1020.02	0.01667	0	0	5.27186	0.006636
3A3_Light	128	137	EQLKSGTASV			9	1019.54	FL_Alone	0.167	1021.45	0.02843	1.43644	0.032957	5.27496	0.004019
3A3_Light	128	137	EQLKSGTASV			9	1019.54	FL_Alone	1.667	1022.15	0.079155	2.12734	0.080891	5.27649	0.003668
3A3_Light	128	137	EQLKSGTASV			9	1019.54	FL_Alone	16.667	1022.55	0.079427	2.53275	0.081158	5.27103	0.003964
3A3_Light	128	137	EQLKSGTASV			9	1019.54	FL_S2_Complex	0	1020.02	0.01667	0	0	5.27186	0.006636
3A3_Light	128	137	EQLKSGTASV			9	1019.54	FL_S2_Complex	0.167	1021.41	0.067775	1.39351	0.069795	5.26999	0.002519
3A3_Light	128	137	EQLKSGTASV			9	1019.54	FL_S2_Complex	1.667	1022.11	0.056963	2.0918	0.059352	5.27712	0.008184
3A3_Light	128	137	EQLKSGTASV			9	1019.54	FL_S2_Complex	16.667	1022.55	0.121517	2.53523	0.122655	5.27679	0.005533
3A3_Light	129	137	QLKSGTASV			8	890.494	FL_Alone	0	890.982	0.00995	0	0	5.10783	0.006012
3A3_Light	129	137	QLKSGTASV			8	890.494	FL_Alone	0.167	892.204	0.016451	1.22146	0.019226	5.10644	0.002164
3A3_Light	129	137	QLKSGTASV			8	890.494	FL_Alone	1.667	892.546	0.064561	1.56347	0.065323	5.11363	0.006536
3A3_Light	129	137	QLKSGTASV			8	890.494	FL_Alone	16.667	892.729	0.076631	1.7464	0.077275	5.10929	0.00544
3A3_Light	129	137	QLKSGTASV			8	890.494	FL_S2_Complex	0	890.982	0.00995	0	0	5.10783	0.006012
3A3_Light	129	137	QLKSGTASV			8	890.494	FL_S2_Complex	0.167	892.161	0.048322	1.17848	0.049336	5.10729	0.002496
3A3_Light	129	137	QLKSGTASV			8	890.494	FL_S2_Complex	1.667	892.529	0.04382	1.54728	0.044936	5.10867	0.005637
3A3_Light	129	137	QLKSGTASV			8	890.494	FL_S2_Complex	16.667	892.685	0.040707	1.70295	0.041905	5.1109	0.002029
3A3_Light	131	137	KSGTASV			6	649.351	FL_Alone	0	650.088	0.015028	0	0	4.45974	0.008616
3A3_Light	131	137	KSGTASV			6	649.351	FL_Alone	0.167	650.483	0.036518	0.394849	0.039489	4.45365	0.002612
3A3_Light	131	137	KSGTASV			6	649.351	FL_Alone	1.667	650.613	0.027845	0.524875	0.031642	4.46344	0.004654
3A3_Light	131	137	KSGTASV			6	649.351	FL_Alone	16.667	650.732	0.043558	0.64403	0.046078	4.46006	0.007294
3A3_Light	131	137	KSGTASV			6	649.351	FL_S2_Complex	0	650.088	0.015028	0	0	4.45974	0.008616
3A3_Light	131	137	KSGTASV			6	649.351	FL_S2_Complex	0.167	650.456	0.048574	0.367703	0.050845	4.45494	0.004021
3A3_Light	131	137	KSGTASV			6	649.351	FL_S2_Complex	1.667	650.594	0.044262	0.505706	0.046743	4.45796	0.009525
3A3_Light	131	137	KSGTASV			6	649.351	FL_S2_Complex	16.667	650.736	0.026671	0.647656	0.030613	4.46164	0.006962
3A3_Light	139	155	CLLNNFYPREAKVQWKV			15	2108.11	FL_Alone	0	2109.27	0.029634	0	0	6.96978	0.00228
3A3_Light	139	155	CLLNNFYPREAKVQWKV			15	2108.11	FL_Alone	0.167	2111.75	0.033817	2.48633	0.044964	6.96864	0.005107
3A3_Light	139	155	CLLNNFYPREAKVQWKV			15	2108.11	FL_Alone	1.667	2112.81	0.065468	3.54502	0.071862	6.96596	0.006037
3A3_Light	139	155	CLLNNFYPREAKVQWKV			15	2108.11	FL_Alone	16.667	2113.49	0.050335	4.22368	0.058411	6.96274	0.007464
3A3_Light	139	155	CLLNNFYPREAKVQWKV			15	2108.11	FL_S2_Complex	0	2109.27	0.029634	0	0	6.96978	0.00228
3A3_Light	139	155	CLLNNFYPREAKVQWKV			15	2108.11	FL_S2_Complex	0.167	2111.73	0.029186	2.45792	0.041593	6.97184	0.005661
3A3_Light	139	155	CLLNNFYPREAKVQWKV			15	2108.11	FL_S2_Complex	1.667	2112.81	0.070904	3.53789	0.076847	6.97287	0.010795
3A3_Light	139	155	CLLNNFYPREAKVQWKV			15	2108.11	FL_S2_Complex	16.667	2113.57	0.045266	4.2992	0.054103	6.9715	0.00411
3A3_Light	141	148	LNNFYPRE			6	1052.52	FL_Alone	0	1053.12	0.024625	0	0	6.35855	0.00599
3A3_Light	141	148	LNNFYPRE			6	1052.52	FL_Alone	0.167	1053.9	0.021572	0.783847	0.032737	6.36818	0.009299
3A3_Light	141	148	LNNFYPRE			6	1052.52	FL_Alone	1.667	1054.19	0.056631	1.06853	0.061753	6.36513	0.00325
3A3_Light	141	148	LNNFYPRE			6	1052.52	FL_Alone	16.667	1054.35	0.090304	1.23202	0.093601	6.35769	0.003719
3A3_Light	141	148	LNNFYPRE			6	1052.52	FL_S2_Complex	0	1053.12	0.024625	0	0	6.35855	0.00599
3A3_Light	141	148	LNNFYPRE			6	1052.52	FL_S2_Complex	0.167	1053.9	0.038695	0.779028	0.045866	6.35935	0.004967
3A3_Light	141	148	LNNFYPRE			6	1052.52	FL_S2_Complex	1.667	1054.14	0.047165	1.02691	0.053206	6.36277	0.010442
3A3_Light	141	148	LNNFYPRE			6	1052.52	FL_S2_Complex	16.667	1054.3	0.083127	1.18451	0.086697	6.36174	0.005161
3A3_Light	141	153	LNNFYPREAKVQW			11	1664.85	FL_Alone	0	1665.79	0.050027	0	0	6.97008	0.003849
3A3_Light	141	153	LNNFYPREAKVQW			11	1664.85	FL_Alone	0.167	1667.51	0.011541	1.72436	0.051341	6.97112	0.004746
3A3_Light	141	153	LNNFYPREAKVQW			11	1664.85	FL_Alone	1.667	1668.88	0.072477	3.09697	0.088066	6.9669	0.004103
3A3_Light	141	153	LNNFYPREAKVQW			11	1664.85	FL_Alone	16.667	1669.31	0.075447	3.52542	0.090526	6.96527	0.006654
3A3_Light	141	153	LNNFYPREAKVQW			11	1664.85	FL_S2_Complex	0	1665.79	0.050027	0	0	6.97008	0.003849
3A3_Light	141	153	LNNFYPREAKVQW			11	1664.85	FL_S2_Complex	0.167	1667.55	0.075654	1.7603	0.090698	6.96582	0.005068
3A3_Light	141	153	LNNFYPREAKVQW			11	1664.85	FL_S2_Complex	1.667	1668.93	0.068294	3.13869	0.084657	6.9665	0.009264
3A3_Light	141	153	LNNFYPREAKVQW			11	1664.85	FL_S2_Complex	16.667	1669.29	0.064549	3.50368	0.081666	6.97012	0.001866
3A3_Light	141	159	LNNFYPREAKVQWKVDNAL			17	2305.21	FL_Alone	0	2306.63	0.078449	0	0	6.8491	0.004635
3A3_Light	141	159	LNNFYPREAKVQWKVDNAL			17	2305.21	FL_Alone	0.167	2309.35	0.066817	2.71682	0.103047	6.85316	0.004633
3A3_Light	141	159	LNNFYPREAKVQWKVDNAL			17	2305.21	FL_Alone	1.667	2310.88	0.068864	4.24696	0.104386	6.8516	0.006006
3A3_Light	141	159	LNNFYPREAKVQWKVDNAL			17	2305.21	FL_Alone	16.667	2312.01	0.133483	5.37863	0.154829	6.84676	0.009564
3A3_Light	141	159	LNNFYPREAKVQWKVDNAL			17	2305.21	FL_S2_Complex	0	2306.63	0.078449	0	0	6.8491	0.004635
3A3_Light	141	159	LNNFYPREAKVQWKVDNAL			17	2305.21	FL_S2_Complex	0.167	2309.37	0.206279	2.73574	0.220693	6.83745	0.003945
3A3_Light	141	159	LNNFYPREAKVQWKVDNAL			17	2305.21	FL_S2_Complex	1.667	2310.9	0.094658	4.26472	0.12294	6.8426	0.006417
3A3_Light	141	159	LNNFYPREAKVQWKVDNAL			17	2305.21	FL_S2_Complex	16.667	2312.2	0.147208	5.56546	0.166807	6.84884	0.00437
3A3_Light	141	166	LNNFYPREAKVQWKVDNALQSGNSQE			24	3035.5	FL_Alone	0	3036.89	0.052568	0	0	6.6359	0.00398
3A3_Light	141	166	LNNFYPREAKVQWKVDNALQSGNSQE			24	3035.5	FL_Alone	0.167	3042.55	0.304698	5.66525	0.309199	6.64493	0.007868
3A3_Light	141	166	LNNFYPREAKVQWKVDNALQSGNSQE			24	3035.5	FL_Alone	1.667	3045	0.279945	8.10905	0.284838	6.64745	0.005642
3A3_Light	141	166	LNNFYPREAKVQWKVDNALQSGNSQE			24	3035.5	FL_Alone	16.667	3045.43	0.170421	8.5445	0.178344	6.63715	0.001533
3A3_Light	141	166	LNNFYPREAKVQWKVDNALQSGNSQE			24	3035.5	FL_S2_Complex	0	3036.89	0.052568	0	0	6.6359	0.00398
3A3_Light	141	166	LNNFYPREAKVQWKVDNALQSGNSQE			24	3035.5	FL_S2_Complex	0.167	3042.72	0.442264	5.83619	0.445377	6.6393	0.00578
3A3_Light	141	166	LNNFYPREAKVQWKVDNALQSGNSQE			24	3035.5	FL_S2_Complex	1.667	3044.9	0.316174	8.01499	0.320515	6.64618	0.008571
3A3_Light	141	166	LNNFYPREAKVQWKVDNALQSGNSQE			24	3035.5	FL_S2_Complex	16.667	3045.34	0.138423	8.44892	0.148069	6.64095	0.006727
3A3_Light	145	166	YPREAKVQWKVDNALQSGNSQE			20	2547.26	FL_Alone	0	2548.8	0.078503	0	0	6.22886	0.003284
3A3_Light	145	166	YPREAKVQWKVDNALQSGNSQE			20	2547.26	FL_Alone	0.167	2553.93	0.162689	5.13054	0.180639	6.23056	0.004519
3A3_Light	145	166	YPREAKVQWKVDNALQSGNSQE			20	2547.26	FL_Alone	1.667	2555.92	0.249479	7.11855	0.261539	6.23457	0.008809
3A3_Light	145	166	YPREAKVQWKVDNALQSGNSQE			20	2547.26	FL_Alone	16.667	2557.09	0.278099	8.29128	0.288966	6.23157	0.002398
3A3_Light	145	166	YPREAKVQWKVDNALQSGNSQE			20	2547.26	FL_S2_Complex	0	2548.8	0.078503	0	0	6.22886	0.003284
3A3_Light	145	166	YPREAKVQWKVDNALQSGNSQE			20	2547.26	FL_S2_Complex	0.167	2553.82	0.240665	5.02226	0.253145	6.23268	0.005861
3A3_Light	145	166	YPREAKVQWKVDNALQSGNSQE			20	2547.26	FL_S2_Complex	1.667	2555.84	0.184962	7.04235	0.200932	6.22894	0.004586
3A3_Light	145	166	YPREAKVQWKVDNALQSGNSQE			20	2547.26	FL_S2_Complex	16.667	2557.3	0.267463	8.49887	0.278745	6.23279	0.00615
3A3_Light	149	166	AKVQWKVDNALQSGNSQE			17	2002	FL_Alone	0	2003.46	0.166962	0	0	6.25636	0.004357
3A3_Light	149	166	AKVQWKVDNALQSGNSQE			17	2002	FL_Alone	0.167	2007.82	0.031768	4.35777	0.169957	6.25791	0.007755
3A3_Light	149	166	AKVQWKVDNALQSGNSQE			17	2002	FL_Alone	1.667	2009.36	0.185864	5.8963	0.249843	6.25619	0.005255
3A3_Light	149	166	AKVQWKVDNALQSGNSQE			17	2002	FL_Alone	16.667	2010.23	0.063589	6.76505	0.178661	6.25321	0.004602
3A3_Light	149	166	AKVQWKVDNALQSGNSQE			17	2002	FL_S2_Complex	0	2003.46	0.166962	0	0	6.25636	0.004357
3A3_Light	149	166	AKVQWKVDNALQSGNSQE			17	2002	FL_S2_Complex	0.167	2007.78	0.028266	4.32066	0.169338	6.25481	0.008108
3A3_Light	149	166	AKVQWKVDNALQSGNSQE			17	2002	FL_S2_Complex	1.667	2009.3	0.114961	5.8438	0.202712	6.25932	0.009859
3A3_Light	149	166	AKVQWKVDNALQSGNSQE			17	2002	FL_S2_Complex	16.667	2010.28	0.087571	6.81994	0.188534	6.25302	0.008821
3A3_Light	149	177	AKVQWKVDNALQSGNSQESVTEQDSKDST			28	3179.51	FL_Alone	0	3181.28	0.036322	0	0	6.09507	0.007592
3A3_Light	149	177	AKVQWKVDNALQSGNSQESVTEQDSKDST			28	3179.51	FL_Alone	0.167	3187.79	0.125447	6.50877	0.130599	6.09452	0.005533
3A3_Light	149	177	AKVQWKVDNALQSGNSQESVTEQDSKDST			28	3179.51	FL_Alone	1.667	3190.89	0.200992	9.60915	0.204248	6.09869	0.003654
3A3_Light	149	177	AKVQWKVDNALQSGNSQESVTEQDSKDST			28	3179.51	FL_Alone	16.667	3192.43	0.164239	11.1481	0.168207	6.09027	0.005108
3A3_Light	149	177	AKVQWKVDNALQSGNSQESVTEQDSKDST			28	3179.51	FL_S2_Complex	0	3181.28	0.036322	0	0	6.09507	0.007592
3A3_Light	149	177	AKVQWKVDNALQSGNSQESVTEQDSKDST			28	3179.51	FL_S2_Complex	0.167	3187.74	0.376359	6.4595	0.378108	6.09463	0.003247
3A3_Light	149	177	AKVQWKVDNALQSGNSQESVTEQDSKDST			28	3179.51	FL_S2_Complex	1.667	3190.85	0.250061	9.56489	0.252685	6.09242	0.006529
3A3_Light	149	177	AKVQWKVDNALQSGNSQESVTEQDSKDST			28	3179.51	FL_S2_Complex	16.667	3192.47	0.439106	11.191	0.440605	6.09013	0.007377
3A3_Light	154	159	KVDNAL			5	659.372	FL_Alone	0	659.906	0.025828	0	0	5.43666	0.004481
3A3_Light	154	159	KVDNAL			5	659.372	FL_Alone	0.167	660.687	0.015123	0.781151	0.02993	5.43485	0.002502
3A3_Light	154	159	KVDNAL			5	659.372	FL_Alone	1.667	660.932	0.026071	1.02598	0.036698	5.44346	0.005752
3A3_Light	154	159	KVDNAL			5	659.372	FL_Alone	16.667	661.422	0.043234	1.51579	0.050361	5.43903	0.003601
3A3_Light	154	159	KVDNAL			5	659.372	FL_S2_Complex	0	659.906	0.025828	0	0	5.43666	0.004481
3A3_Light	154	159	KVDNAL			5	659.372	FL_S2_Complex	0.167	660.66	0.048184	0.754692	0.05467	5.44025	0.002094
3A3_Light	154	159	KVDNAL			5	659.372	FL_S2_Complex	1.667	660.9	0.026097	0.994202	0.036717	5.44389	0.00899
3A3_Light	154	159	KVDNAL			5	659.372	FL_S2_Complex	16.667	661.413	0.030072	1.5068	0.039641	5.44254	0.006403
3A3_Light	154	177	KVDNALQSGNSQESVTEQDSKDST			23	2567.17	FL_Alone	0	2568.61	0.041299	0	0	5.34272	0.003099
3A3_Light	154	177	KVDNALQSGNSQESVTEQDSKDST			23	2567.17	FL_Alone	0.167	2574.82	0.083555	6.20946	0.093204	5.33744	0.003646
3A3_Light	154	177	KVDNALQSGNSQESVTEQDSKDST			23	2567.17	FL_Alone	1.667	2577.16	0.269197	8.54702	0.272347	5.34462	0.003128
3A3_Light	154	177	KVDNALQSGNSQESVTEQDSKDST			23	2567.17	FL_Alone	16.667	2578.52	0.223534	9.91017	0.227317	5.33973	0.003682
3A3_Light	154	177	KVDNALQSGNSQESVTEQDSKDST			23	2567.17	FL_S2_Complex	0	2568.61	0.041299	0	0	5.34272	0.003099
3A3_Light	154	177	KVDNALQSGNSQESVTEQDSKDST			23	2567.17	FL_S2_Complex	0.167	2574.65	0.179129	6.0408	0.183828	5.34043	0.002451
3A3_Light	154	177	KVDNALQSGNSQESVTEQDSKDST			23	2567.17	FL_S2_Complex	1.667	2577.08	0.163882	8.46968	0.169006	5.3411	0.006654
3A3_Light	154	177	KVDNALQSGNSQESVTEQDSKDST			23	2567.17	FL_S2_Complex	16.667	2578.46	0.114542	9.85074	0.12176	5.34405	0.008874
3A3_Light	160	177	QSGNSQESVTEQDSKDST			17	1926.82	FL_Alone	0	1927.96	0.037832	0	0	4.92655	0.00088
3A3_Light	160	177	QSGNSQESVTEQDSKDST			17	1926.82	FL_Alone	0.167	1931.67	0.072262	3.71474	0.081566	4.92323	0.002165
3A3_Light	160	177	QSGNSQESVTEQDSKDST			17	1926.82	FL_Alone	1.667	1933.46	0.221842	5.50557	0.225045	4.92554	0.009066
3A3_Light	160	177	QSGNSQESVTEQDSKDST			17	1926.82	FL_Alone	16.667	1934.35	0.200297	6.39626	0.203839	4.91794	0.00814
3A3_Light	160	177	QSGNSQESVTEQDSKDST			17	1926.82	FL_S2_Complex	0	1927.96	0.037832	0	0	4.92655	0.00088
3A3_Light	160	177	QSGNSQESVTEQDSKDST			17	1926.82	FL_S2_Complex	0.167	1931.61	0.114752	3.65694	0.120828	4.92047	0.001171
3A3_Light	160	177	QSGNSQESVTEQDSKDST			17	1926.82	FL_S2_Complex	1.667	1933.42	0.154274	5.4684	0.158845	4.91872	0.004269
3A3_Light	160	177	QSGNSQESVTEQDSKDST			17	1926.82	FL_S2_Complex	16.667	1934.29	0.104168	6.33655	0.110825	4.91764	0.003348
3A3_Light	161	166	SGNSQE			5	621.247	FL_Alone	0	621.484	0.010456	0	0	5.17987	0.008003
3A3_Light	161	166	SGNSQE			5	621.247	FL_Alone	0.167	623.433	0.027301	1.94887	0.029235	5.17785	0.001253
3A3_Light	161	166	SGNSQE			5	621.247	FL_Alone	1.667	623.85	0.06931	2.36652	0.070095	5.17875	0.004591
3A3_Light	161	166	SGNSQE			5	621.247	FL_Alone	16.667	624.111	0.048408	2.62742	0.049524	5.1749	0.003928
3A3_Light	161	166	SGNSQE			5	621.247	FL_S2_Complex	0	621.484	0.010456	0	0	5.17987	0.008003
3A3_Light	161	166	SGNSQE			5	621.247	FL_S2_Complex	0.167	623.381	0.078529	1.89749	0.079222	5.16792	0.001306
3A3_Light	161	166	SGNSQE			5	621.247	FL_S2_Complex	1.667	623.827	0.078284	2.34282	0.07898	5.17299	0.007707
3A3_Light	161	166	SGNSQE			5	621.247	FL_S2_Complex	16.667	624.157	0.052407	2.6733	0.05344	5.17246	0.006204
3A3_Light	165	177	QESVTEQDSKDST			12	1453.63	FL_Alone	0	1454.35	0.023846	0	0	4.7865	0.009072
3A3_Light	165	177	QESVTEQDSKDST			12	1453.63	FL_Alone	0.167	1456.48	0.008295	2.12209	0.025247	4.78558	0.002017
3A3_Light	165	177	QESVTEQDSKDST			12	1453.63	FL_Alone	1.667	1457.87	0.091564	3.52101	0.094618	4.78839	0.003939
3A3_Light	165	177	QESVTEQDSKDST			12	1453.63	FL_Alone	16.667	1458.62	0.081686	4.27178	0.085095	4.78329	0.008291
3A3_Light	165	177	QESVTEQDSKDST			12	1453.63	FL_S2_Complex	0	1454.35	0.023846	0	0	4.7865	0.009072
3A3_Light	165	177	QESVTEQDSKDST			12	1453.63	FL_S2_Complex	0.167	1456.42	0.102382	2.06518	0.105122	4.79056	0.005509
3A3_Light	165	177	QESVTEQDSKDST			12	1453.63	FL_S2_Complex	1.667	1457.84	0.122945	3.48435	0.125236	4.79197	0.008466
3A3_Light	165	177	QESVTEQDSKDST			12	1453.63	FL_S2_Complex	16.667	1458.65	0.0555	4.29365	0.060406	4.78804	0.006962
3A3_Light	166	177	ESVTEQDSKDST			11	1325.57	FL_Alone	0	1326.28	0.011237	0	0	4.7273	0.004547
3A3_Light	166	177	ESVTEQDSKDST			11	1325.57	FL_Alone	0.167	1328.29	0.020109	2.00497	0.023036	4.72414	0.000824
3A3_Light	166	177	ESVTEQDSKDST			11	1325.57	FL_Alone	1.667	1329.68	0.12878	3.39419	0.129269	4.72673	0.007489
3A3_Light	166	177	ESVTEQDSKDST			11	1325.57	FL_Alone	16.667	1330.37	0.105502	4.08892	0.106099	4.72145	0.005446
3A3_Light	166	177	ESVTEQDSKDST			11	1325.57	FL_S2_Complex	0	1326.28	0.011237	0	0	4.7273	0.004547
3A3_Light	166	177	ESVTEQDSKDST			11	1325.57	FL_S2_Complex	0.167	1328.3	0.075734	2.01853	0.076563	4.72517	0.003155
3A3_Light	166	177	ESVTEQDSKDST			11	1325.57	FL_S2_Complex	1.667	1329.65	0.087326	3.36299	0.088046	4.72431	0.004901
3A3_Light	166	177	ESVTEQDSKDST			11	1325.57	FL_S2_Complex	16.667	1330.33	0.048442	4.0515	0.049729	4.72602	0.00605
3A3_Light	167	177	SVTEQDSKDST			10	1196.53	FL_Alone	0	1197.36	0.024219	0	0	4.45996	0.007488
3A3_Light	167	177	SVTEQDSKDST			10	1196.53	FL_Alone	0.167	1199.1	0.02099	1.74226	0.032049	4.45104	0.000881
3A3_Light	167	177	SVTEQDSKDST			10	1196.53	FL_Alone	1.667	1200.05	0.08431	2.69022	0.08772	4.46093	0.003734
3A3_Light	167	177	SVTEQDSKDST			10	1196.53	FL_Alone	16.667	1200.6	0.074634	3.24363	0.078465	4.4577	0.005653
3A3_Light	167	177	SVTEQDSKDST			10	1196.53	FL_S2_Complex	0	1197.36	0.024219	0	0	4.45996	0.007488
3A3_Light	167	177	SVTEQDSKDST			10	1196.53	FL_S2_Complex	0.167	1199.08	0.088944	1.72131	0.092182	4.45518	0.003507
3A3_Light	167	177	SVTEQDSKDST			10	1196.53	FL_S2_Complex	1.667	1200.03	0.063204	2.67367	0.067685	4.45904	0.00935
3A3_Light	167	177	SVTEQDSKDST			10	1196.53	FL_S2_Complex	16.667	1200.61	0.034474	3.25251	0.042131	4.46048	0.007101
3A3_Light	167	178	SVTEQDSKDSTY			11	1359.59	FL_Alone	0	1360.32	0.037761	0	0	5.29361	0.007813
3A3_Light	167	178	SVTEQDSKDSTY			11	1359.59	FL_Alone	0.167	1362.11	0.072302	1.79157	0.081569	5.29526	0.002317
3A3_Light	167	178	SVTEQDSKDSTY			11	1359.59	FL_Alone	1.667	1363.09	0.065986	2.76335	0.076026	5.29502	0.005813
3A3_Light	167	178	SVTEQDSKDSTY			11	1359.59	FL_Alone	16.667	1363.61	0.098231	3.28998	0.105239	5.2919	0.004686
3A3_Light	167	178	SVTEQDSKDSTY			11	1359.59	FL_S2_Complex	0	1360.32	0.037761	0	0	5.29361	0.007813
3A3_Light	167	178	SVTEQDSKDSTY			11	1359.59	FL_S2_Complex	0.167	1362.04	0.093469	1.72201	0.100808	5.28756	0.003725
3A3_Light	167	178	SVTEQDSKDSTY			11	1359.59	FL_S2_Complex	1.667	1362.98	0.039901	2.65885	0.054936	5.2938	0.003747
3A3_Light	167	178	SVTEQDSKDSTY			11	1359.59	FL_S2_Complex	16.667	1363.52	0.047945	3.19624	0.06103	5.29764	0.004475
3A3_Light	167	183	SVTEQDSKDSTYSLSST			16	1834.82	FL_Alone	0	1835.9	0.038304	0	0	5.96307	0.002056
3A3_Light	167	183	SVTEQDSKDSTYSLSST			16	1834.82	FL_Alone	0.167	1837.79	0.056776	1.88599	0.068489	5.96233	0.006911
3A3_Light	167	183	SVTEQDSKDSTYSLSST			16	1834.82	FL_Alone	1.667	1838.72	0.138092	2.82052	0.143306	5.95945	0.003062
3A3_Light	167	183	SVTEQDSKDSTYSLSST			16	1834.82	FL_Alone	16.667	1839.5	0.103927	3.59405	0.110761	5.9542	0.005827
3A3_Light	167	183	SVTEQDSKDSTYSLSST			16	1834.82	FL_S2_Complex	0	1835.9	0.038304	0	0	5.96307	0.002056
3A3_Light	167	183	SVTEQDSKDSTYSLSST			16	1834.82	FL_S2_Complex	0.167	1837.85	0.128482	1.95024	0.13407	5.95969	0.005514
3A3_Light	167	183	SVTEQDSKDSTYSLSST			16	1834.82	FL_S2_Complex	1.667	1838.83	0.088245	2.92726	0.0962	5.96255	0.008404
3A3_Light	167	183	SVTEQDSKDSTYSLSST			16	1834.82	FL_S2_Complex	16.667	1839.54	0.081538	3.64261	0.090087	5.96625	0.006124
3A3_Light	167	186	SVTEQDSKDSTYSLSSTLTL			19	2162.03	FL_Alone	0	2163.23	0.044139	0	0	7.4672	0.005384
3A3_Light	167	186	SVTEQDSKDSTYSLSSTLTL			19	2162.03	FL_Alone	0.167	2165.21	0.074217	1.97934	0.08635	7.47623	0.006248
3A3_Light	167	186	SVTEQDSKDSTYSLSSTLTL			19	2162.03	FL_Alone	1.667	2166.43	0.150844	3.20197	0.15717	7.4753	0.001143
3A3_Light	167	186	SVTEQDSKDSTYSLSSTLTL			19	2162.03	FL_Alone	16.667	2167.25	0.208373	4.01655	0.212996	7.46255	0.010391
3A3_Light	167	186	SVTEQDSKDSTYSLSSTLTL			19	2162.03	FL_S2_Complex	0	2163.23	0.044139	0	0	7.4672	0.005384
3A3_Light	167	186	SVTEQDSKDSTYSLSSTLTL			19	2162.03	FL_S2_Complex	0.167	2165.1	0.143713	1.86821	0.150338	7.4646	0.00484
3A3_Light	167	186	SVTEQDSKDSTYSLSSTLTL			19	2162.03	FL_S2_Complex	1.667	2166.42	0.290677	3.19447	0.294009	7.46989	0.005771
3A3_Light	167	186	SVTEQDSKDSTYSLSSTLTL			19	2162.03	FL_S2_Complex	16.667	2167.01	0.234516	3.77581	0.238633	7.46021	0.007019
3A3_Light	169	177	TEQDSKDST			8	1010.43	FL_Alone	0	1010.92	0.018534	0	0	4.45559	0.006782
3A3_Light	169	177	TEQDSKDST			8	1010.43	FL_Alone	0.167	1012.5	0.013673	1.58663	0.023032	4.44871	0.000996
3A3_Light	169	177	TEQDSKDST			8	1010.43	FL_Alone	1.667	1013.34	0.05713	2.42493	0.060061	4.45773	0.004693
3A3_Light	169	177	TEQDSKDST			8	1010.43	FL_Alone	16.667	1013.79	0.048793	2.86965	0.052194	4.4545	0.005606
3A3_Light	169	177	TEQDSKDST			8	1010.43	FL_S2_Complex	0	1010.92	0.018534	0	0	4.45559	0.006782
3A3_Light	169	177	TEQDSKDST			8	1010.43	FL_S2_Complex	0.167	1012.51	0.064467	1.59282	0.067079	4.45082	0.002855
3A3_Light	169	177	TEQDSKDST			8	1010.43	FL_S2_Complex	1.667	1013.33	0.039617	2.41051	0.043738	4.45526	0.008508
3A3_Light	169	177	TEQDSKDST			8	1010.43	FL_S2_Complex	16.667	1013.8	0.02233	2.87841	0.029019	4.45608	0.005983
3A3_Light	171	177	QDSKDST			6	780.337	FL_Alone	0	780.67	0.015221	0	0	4.45599	0.005997
3A3_Light	171	177	QDSKDST			6	780.337	FL_Alone	0.167	782.072	0.022314	1.40213	0.027011	4.44813	0.001655
3A3_Light	171	177	QDSKDST			6	780.337	FL_Alone	1.667	782.75	0.041845	2.07987	0.044528	4.45686	0.004866
3A3_Light	171	177	QDSKDST			6	780.337	FL_Alone	16.667	783.109	0.061363	2.43905	0.063223	4.45348	0.005102
3A3_Light	171	177	QDSKDST			6	780.337	FL_S2_Complex	0	780.67	0.015221	0	0	4.45599	0.005997
3A3_Light	171	177	QDSKDST			6	780.337	FL_S2_Complex	0.167	782.047	0.08717	1.37704	0.088489	4.4515	0.002958
3A3_Light	171	177	QDSKDST			6	780.337	FL_S2_Complex	1.667	782.752	0.080601	2.08179	0.082026	4.4561	0.009094
3A3_Light	171	177	QDSKDST			6	780.337	FL_S2_Complex	16.667	783.125	0.040391	2.45537	0.043164	4.45678	0.007743
3A3_Light	172	177	DSKDST			5	652.278	FL_Alone	0	652.534	0.009456	0	0	4.45416	0.007536
3A3_Light	172	177	DSKDST			5	652.278	FL_Alone	0.167	653.761	0.028474	1.22645	0.030003	4.44625	0.001703
3A3_Light	172	177	DSKDST			5	652.278	FL_Alone	1.667	654.315	0.038034	1.78072	0.039192	4.45724	0.003623
3A3_Light	172	177	DSKDST			5	652.278	FL_Alone	16.667	654.649	0.045747	2.11479	0.046714	4.45278	0.005591
3A3_Light	172	177	DSKDST			5	652.278	FL_S2_Complex	0	652.534	0.009456	0	0	4.45416	0.007536
3A3_Light	172	177	DSKDST			5	652.278	FL_S2_Complex	0.167	653.748	0.058123	1.21346	0.058887	4.45181	0.003695
3A3_Light	172	177	DSKDST			5	652.278	FL_S2_Complex	1.667	654.293	0.044324	1.7585	0.045321	4.4546	0.00998
3A3_Light	172	177	DSKDST			5	652.278	FL_S2_Complex	16.667	654.656	0.04459	2.12226	0.045582	4.45606	0.006749
3A3_Light	172	183	DSKDSTYSLSST			11	1290.57	FL_Alone	0	1291.07	0.030107	0	0	5.97333	0.005161
3A3_Light	172	183	DSKDSTYSLSST			11	1290.57	FL_Alone	0.167	1291.94	0.051605	0.870316	0.059746	5.97372	0.003292
3A3_Light	172	183	DSKDSTYSLSST			11	1290.57	FL_Alone	1.667	1292.29	0.047711	1.22175	0.056416	5.97504	0.006665
3A3_Light	172	183	DSKDSTYSLSST			11	1290.57	FL_Alone	16.667	1292.67	0.081001	1.59958	0.086415	5.9713	0.006327
3A3_Light	172	183	DSKDSTYSLSST			11	1290.57	FL_S2_Complex	0	1291.07	0.030107	0	0	5.97333	0.005161
3A3_Light	172	183	DSKDSTYSLSST			11	1290.57	FL_S2_Complex	0.167	1291.85	0.056205	0.778228	0.063761	5.97359	0.002935
3A3_Light	172	183	DSKDSTYSLSST			11	1290.57	FL_S2_Complex	1.667	1292.1	0.056834	1.02657	0.064316	5.97788	0.007605
3A3_Light	172	183	DSKDSTYSLSST			11	1290.57	FL_S2_Complex	16.667	1292.53	0.037871	1.46027	0.04838	5.97799	0.003889
3A3_Light	178	183	YSLSST			5	657.309	FL_Alone	0	657.889	0.023506	0	0	6.14735	0.004728
3A3_Light	178	183	YSLSST			5	657.309	FL_Alone	0.167	657.95	0.000235	0.060698	0.023508	6.14499	0.003834
3A3_Light	178	183	YSLSST			5	657.309	FL_Alone	1.667	657.952	0.016917	0.063029	0.028961	6.14785	0.003455
3A3_Light	178	183	YSLSST			5	657.309	FL_Alone	16.667	658.149	0.031593	0.259896	0.039379	6.14518	0.005951
3A3_Light	178	183	YSLSST			5	657.309	FL_S2_Complex	0	657.889	0.023506	0	0	6.14735	0.004728
3A3_Light	178	183	YSLSST			5	657.309	FL_S2_Complex	0.167	657.848	0.02869	-0.040878	0.03709	6.14342	0.005252
3A3_Light	178	183	YSLSST			5	657.309	FL_S2_Complex	1.667	657.866	0.019072	-0.0231	0.03027	6.14684	0.007759
3A3_Light	178	183	YSLSST			5	657.309	FL_S2_Complex	16.667	658.074	0.018398	0.185311	0.02985	6.14566	0.006624
3A3_Light	178	184	YSLSSTL			6	770.393	FL_Alone	0	771.011	0.033746	0	0	7.2664	0.003894
3A3_Light	178	184	YSLSSTL			6	770.393	FL_Alone	0.167	771.098	0.007634	0.086972	0.034599	7.27209	0.00573
3A3_Light	178	184	YSLSSTL			6	770.393	FL_Alone	1.667	771.101	0.017438	0.090383	0.037985	7.27378	0.002575
3A3_Light	178	184	YSLSSTL			6	770.393	FL_Alone	16.667	771.293	0.013298	0.282021	0.036272	7.26929	0.002568
3A3_Light	178	184	YSLSSTL			6	770.393	FL_S2_Complex	0	771.011	0.033746	0	0	7.2664	0.003894
3A3_Light	178	184	YSLSSTL			6	770.393	FL_S2_Complex	0.167	770.976	0.021981	-0.034782	0.040274	7.27037	0.001735
3A3_Light	178	184	YSLSSTL			6	770.393	FL_S2_Complex	1.667	770.984	0.030155	-0.026297	0.045256	7.27605	0.007011
3A3_Light	178	184	YSLSSTL			6	770.393	FL_S2_Complex	16.667	771.201	0.024423	0.190036	0.041657	7.269	0.005763
3A3_Light	178	186	YSLSSTLTL			8	984.525	FL_Alone	0	985.047	0.00689	0	0	7.94458	0.001735
3A3_Light	178	186	YSLSSTLTL			8	984.525	FL_Alone	0.167	985.353	0.024525	0.305643	0.025474	7.95733	0.00455
3A3_Light	178	186	YSLSSTLTL			8	984.525	FL_Alone	1.667	985.784	0.026218	0.737469	0.027108	7.94755	0.005106
3A3_Light	178	186	YSLSSTLTL			8	984.525	FL_Alone	16.667	986.141	0.039227	1.09437	0.039828	7.94639	0.009477
3A3_Light	178	186	YSLSSTLTL			8	984.525	FL_S2_Complex	0	985.047	0.00689	0	0	7.94458	0.001735
3A3_Light	178	186	YSLSSTLTL			8	984.525	FL_S2_Complex	0.167	985.324	0.017159	0.27741	0.018491	7.94922	0.003422
3A3_Light	178	186	YSLSSTLTL			8	984.525	FL_S2_Complex	1.667	985.811	0.019917	0.764229	0.021075	7.94939	0.004375
3A3_Light	178	186	YSLSSTLTL			8	984.525	FL_S2_Complex	16.667	986.171	0.016522	1.12458	0.017901	7.95132	0.00213
3A3_Light	181	186	SSTLTL			5	621.345	FL_Alone	0	621.601	0.00898	0	0	7.0878	0.002219
3A3_Light	181	186	SSTLTL			5	621.345	FL_Alone	0.167	621.799	0.017399	0.197867	0.01958	7.09039	0.004096
3A3_Light	181	186	SSTLTL			5	621.345	FL_Alone	1.667	622.222	0.03437	0.621439	0.035524	7.09279	0.002069
3A3_Light	181	186	SSTLTL			5	621.345	FL_Alone	16.667	622.42	0.051584	0.819269	0.05236	7.085	0.005331
3A3_Light	181	186	SSTLTL			5	621.345	FL_S2_Complex	0	621.601	0.00898	0	0	7.0878	0.002219
3A3_Light	181	186	SSTLTL			5	621.345	FL_S2_Complex	0.167	621.77	0.009956	0.16921	0.013408	7.08709	0.002754
3A3_Light	181	186	SSTLTL			5	621.345	FL_S2_Complex	1.667	622.204	0.035226	0.602916	0.036353	7.09055	0.006239
3A3_Light	181	186	SSTLTL			5	621.345	FL_S2_Complex	16.667	622.401	0.036803	0.800814	0.037883	7.08597	0.003566
3A3_Light	181	200	SSTLTLSKADYEKHKVYACE			19	2273.11	FL_Alone	0	2274.37	0.057136	0	0	5.84932	0.006592
3A3_Light	181	200	SSTLTLSKADYEKHKVYACE			19	2273.11	FL_Alone	0.167	2276.21	0.121112	1.83187	0.133913	5.85329	0.007884
3A3_Light	181	200	SSTLTLSKADYEKHKVYACE			19	2273.11	FL_Alone	1.667	2277.15	0.069032	2.77127	0.08961	5.85627	0.005242
3A3_Light	181	200	SSTLTLSKADYEKHKVYACE			19	2273.11	FL_Alone	16.667	2277.96	0.12004	3.58509	0.132944	5.84849	0.002713
3A3_Light	181	200	SSTLTLSKADYEKHKVYACE			19	2273.11	FL_S2_Complex	0	2274.37	0.057136	0	0	5.84932	0.006592
3A3_Light	181	200	SSTLTLSKADYEKHKVYACE			19	2273.11	FL_S2_Complex	0.167	2276.22	0.061803	1.84509	0.084167	5.83926	0.002712
3A3_Light	181	200	SSTLTLSKADYEKHKVYACE			19	2273.11	FL_S2_Complex	1.667	2277.35	0.105988	2.97315	0.120408	5.85316	0.011025
3A3_Light	181	200	SSTLTLSKADYEKHKVYACE			19	2273.11	FL_S2_Complex	16.667	2278.1	0.131074	3.73003	0.142986	5.84573	0.004129
3A3_Light	184	189	LTLSKA			5	632.398	FL_Alone	0	632.667	0.016999	0	0	5.55942	0.006792
3A3_Light	184	189	LTLSKA			5	632.398	FL_Alone	0.167	633.849	0.016349	1.18179	0.023585	5.56201	0.00376
3A3_Light	184	189	LTLSKA			5	632.398	FL_Alone	1.667	634.095	0.05646	1.42796	0.058964	5.56542	0.003484
3A3_Light	184	189	LTLSKA			5	632.398	FL_Alone	16.667	634.185	0.083302	1.51801	0.085018	5.55942	0.005461
3A3_Light	184	189	LTLSKA			5	632.398	FL_S2_Complex	0	632.667	0.016999	0	0	5.55942	0.006792
3A3_Light	184	189	LTLSKA			5	632.398	FL_S2_Complex	0.167	633.806	0.033318	1.13898	0.037404	5.55609	0.00245
3A3_Light	184	189	LTLSKA			5	632.398	FL_S2_Complex	1.667	634.084	0.056785	1.41683	0.059274	5.56095	0.008423
3A3_Light	184	189	LTLSKA			5	632.398	FL_S2_Complex	16.667	634.163	0.061241	1.49578	0.063556	5.55983	0.00677
3A3_Light	184	200	LTLSKADYEKHKVYACE			16	1998	FL_Alone	0	1999.18	0.012546	0	0	5.7055	0.003833
3A3_Light	184	200	LTLSKADYEKHKVYACE			16	1998	FL_Alone	0.167	2000.61	0.030011	1.43112	0.032528	5.70742	0.005525
3A3_Light	184	200	LTLSKADYEKHKVYACE			16	1998	FL_Alone	1.667	2001.12	0.138229	1.93989	0.138797	5.71235	0.006821
3A3_Light	184	200	LTLSKADYEKHKVYACE			16	1998	FL_Alone	16.667	2001.63	0.235812	2.44961	0.236145	5.71082	0.006426
3A3_Light	184	200	LTLSKADYEKHKVYACE			16	1998	FL_S2_Complex	0	1999.18	0.012546	0	0	5.7055	0.003833
3A3_Light	184	200	LTLSKADYEKHKVYACE			16	1998	FL_S2_Complex	0.167	2000.51	0.12701	1.32874	0.127628	5.70907	0.002398
3A3_Light	184	200	LTLSKADYEKHKVYACE			16	1998	FL_S2_Complex	1.667	2000.94	0.05878	1.75517	0.060104	5.70764	0.004581
3A3_Light	184	200	LTLSKADYEKHKVYACE			16	1998	FL_S2_Complex	16.667	2001.49	0.134372	2.31142	0.134957	5.70788	0.004843
3A3_Light	201	206	VTHQGL			5	654.357	FL_Alone	0	654.613	0.030063	0	0	5.19076	0.008113
3A3_Light	201	206	VTHQGL			5	654.357	FL_Alone	0.167	654.725	0.001324	0.112753	0.030092	5.19421	0.001579
3A3_Light	201	206	VTHQGL			5	654.357	FL_Alone	1.667	654.922	0.048389	0.309214	0.056968	5.19814	0.005015
3A3_Light	201	206	VTHQGL			5	654.357	FL_Alone	16.667	655.022	0.043497	0.408924	0.052875	5.19415	0.006952
3A3_Light	201	206	VTHQGL			5	654.357	FL_S2_Complex	0	654.613	0.030063	0	0	5.19076	0.008113
3A3_Light	201	206	VTHQGL			5	654.357	FL_S2_Complex	0.167	654.721	0.031935	0.107907	0.043859	5.19323	0.005076
3A3_Light	201	206	VTHQGL			5	654.357	FL_S2_Complex	1.667	654.912	0.01322	0.298999	0.032841	5.19998	0.005731
3A3_Light	201	206	VTHQGL			5	654.357	FL_S2_Complex	16.667	655.063	0.038387	0.450055	0.048758	5.20187	0.004542
3A3_Light	201	211	VTHQGLSSPVT			9	1125.59	FL_Alone	0	1126.12	0.02467	0	0	5.62348	0.003764
3A3_Light	201	211	VTHQGLSSPVT			9	1125.59	FL_Alone	0.167	1126.92	0.035685	0.803983	0.043383	5.62535	0.002352
3A3_Light	201	211	VTHQGLSSPVT			9	1125.59	FL_Alone	1.667	1127.24	0.103625	1.12158	0.106521	5.63355	0.003837
3A3_Light	201	211	VTHQGLSSPVT			9	1125.59	FL_Alone	16.667	1127.65	0.072883	1.53527	0.076945	5.62566	0.004454
3A3_Light	201	211	VTHQGLSSPVT			9	1125.59	FL_S2_Complex	0	1126.12	0.02467	0	0	5.62348	0.003764
3A3_Light	201	211	VTHQGLSSPVT			9	1125.59	FL_S2_Complex	0.167	1126.86	0.115177	0.741773	0.117789	5.62584	0.001001
3A3_Light	201	211	VTHQGLSSPVT			9	1125.59	FL_S2_Complex	1.667	1127.22	0.10154	1.10128	0.104494	5.63137	0.00302
3A3_Light	201	211	VTHQGLSSPVT			9	1125.59	FL_S2_Complex	16.667	1127.76	0.060295	1.64516	0.065146	5.6316	0.005387
3A3_Light	201	213	VTHQGLSSPVTKS			11	1340.72	FL_Alone	0	1341.57	0.043542	0	0	5.08142	0.009228
3A3_Light	201	213	VTHQGLSSPVTKS			11	1340.72	FL_Alone	0.167	1342.44	0.043227	0.878412	0.061355	5.07906	0.006781
3A3_Light	201	213	VTHQGLSSPVTKS			11	1340.72	FL_Alone	1.667	1342.72	0.07759	1.15614	0.088973	5.08013	0.005121
3A3_Light	201	213	VTHQGLSSPVTKS			11	1340.72	FL_Alone	16.667	1343.11	0.147704	1.54806	0.153988	5.07759	0.006458
3A3_Light	201	213	VTHQGLSSPVTKS			11	1340.72	FL_S2_Complex	0	1341.57	0.043542	0	0	5.08142	0.009228
3A3_Light	201	213	VTHQGLSSPVTKS			11	1340.72	FL_S2_Complex	0.167	1342.46	0.165456	0.895083	0.17109	5.07346	0.006125
3A3_Light	201	213	VTHQGLSSPVTKS			11	1340.72	FL_S2_Complex	1.667	1342.58	0.136131	1.01577	0.142925	5.081	0.011071
3A3_Light	201	213	VTHQGLSSPVTKS			11	1340.72	FL_S2_Complex	16.667	1343.05	0.231465	1.48582	0.235525	5.07869	0.007048
3A3_Light	201	219	VTHQGLSSPVTKSFNRGEC			17	2047	FL_Alone	0	2048.32	0.067874	0	0	5.81042	0.004284
3A3_Light	201	219	VTHQGLSSPVTKSFNRGEC			17	2047	FL_Alone	0.167	2049.14	0.047859	0.817827	0.08305	5.81063	0.003394
3A3_Light	201	219	VTHQGLSSPVTKSFNRGEC			17	2047	FL_Alone	1.667	2049.18	0.161854	0.857418	0.175509	5.81423	0.00577
3A3_Light	201	219	VTHQGLSSPVTKSFNRGEC			17	2047	FL_Alone	16.667	2049.41	0.334564	1.08789	0.341379	5.81027	0.004253
3A3_Light	201	219	VTHQGLSSPVTKSFNRGEC			17	2047	FL_S2_Complex	0	2048.32	0.067874	0	0	5.81042	0.004284
3A3_Light	201	219	VTHQGLSSPVTKSFNRGEC			17	2047	FL_S2_Complex	0.167	2048.96	0.158396	0.638442	0.172326	5.81264	0.00456
3A3_Light	201	219	VTHQGLSSPVTKSFNRGEC			17	2047	FL_S2_Complex	1.667	2049.05	0.061397	0.728761	0.091523	5.80966	0.002757
3A3_Light	201	219	VTHQGLSSPVTKSFNRGEC			17	2047	FL_S2_Complex	16.667	2049.26	0.25457	0.937587	0.263463	5.80928	0.00337

## Sheet: Sequences
Spike	MFVFLVLLPLVSSQCVNLTTRTQLPPAYTNSFTRGVYYPDKVFRSSVLHSTQDLFLPFFSNVTWFHAIHVSGTNGTKRFDNPVLPFNDGVYFASTEKSNIIRGWIFGTTLDSKTQSLLIVNNATNVVIKVCEFQFCNDPFLGVYYHKNNKSWMESEFRVYSSANNCTFEYVSQPFLMDLEGKQGNFKNLREFVFKNIDGYFKIYSKHTPINLVRDLPQGFSALEPLVDLPIGINITRFQTLLALHRSYLTPGDSSSGWTAGAAAYYVGYLQPRTFLLKYNENGTITDAVDCALDPLSETKCTLKSFTVEKGIYQTSNFRVQPTESIVRFPNITNLCPFGEVFNATRFASVYAWNRKRISNCVADYSVLYNSASFSTFKCYGVSPTKLNDLCFTNVYADS…
3A3 IgG heavy chain	MGWSCIILFLVATATGVHSQVQLQQSGAELLKPGASVKLSCTASGFNIKDTYIHWLKQRPEQGLEWIGRIGPAIGNTIYAPKFQGKATITTDTSSNTAYLQLSSLTSEDTAVYYCARYYGSSYYYFDYWGQGTTLTVSSASTKGPSVFPLAPSSKSTSGGTAALGCLVKDYFPEPVTVSWNSGALTSGVHTFPAVLQSSGLYSLSSVVTVPSSSLGTQTYICNVNHKPSNTKVDKRVEPKSCDKTHTCPPCPAPELLGGPSVFLFPPKPKDTLMISRTPEVTCVVVDVSHEDPEVKFNWYVDGVEVHNAKTKPREEQYNSTYRVVSVLTVLHQDWLNGKEYKCKVSNKALPAPIEKTISKAKGQPREPQVYTLPPSREEMTKNQVSLTCLVKGFYPSDI…
3A3 IgG light chain	MGWSCIILFLVATATGVHSDIVMTQSAPSVPVTPGESVSISCRSSKSLLHSNGNTYLYWFLQRPGQSPQLLIYRMSNLASGVPDRFSGSGSGTAFTLRISRVEAEDVGVYYCMQYLEYPLTFGAGTKLELKRTVAAPSVFIFPPSDEQLKSGTASVVCLLNNFYPREAKVQWKVDNALQSGNSQESVTEQDSKDSTYSLSSTLTLSKADYEKHKVYACEVTHQGLSSPVTKSFNRGEC
